# Supplementary material for: Meta-analysis of RNA-Seq studies reveals genes with dominant functions during flower bud endo- to eco-dormancy transition in Prunus species
Source: Sci Rep. 2021 Jun 23;11:13173. doi: 10.1038/s41598-021-92600-6 (PMC8222350; doi:10.1038/s41598-021-92600-6)
Supplement: Supplementary file 3 — Supplementary Information 3. [file 41598_2021_92600_MOESM3_ESM.xlsx]

## Sheet: RPKM
gene_id	HCR-En1	HCR-En2	HCR-Eco	LCR-En1	LCR-En2	LCR-Eco
PARG00006	2.33413	2.61315	17.1375	3.63147	1.721	17.517
PARG00007	50.7449	43.0498	57.7431	49.492	34.2877	38.8444
PARG00008	39.2814	14.9518	33.415	26.2724	15.0144	46.5951
PARG00009	12.5189	7.33138	19.8858	7.33518	8.0489	11.7927
PARG00010	369.803	362.475	272.879	351.184	301.421	311.961
PARG00011	152.986	9.44386	39.3353	47.8449	353.486	237.935
PARG00012	121.476	70.9839	73.8952	115.409	196.916	342.986
PARG00013	102.385	118.503	135.808	72.1774	96.6083	30.3305
PARG00014	138.343	78.3822	72.0183	112.192	85.4063	88.0072
PARG00015	773.733	838.639	763.377	790.879	867.739	934.152
PARG00019	156.48	57.1914	387.946	160.1	59.5312	135.938
PARG00020	61.4078	43.3946	76.5167	54.5557	35.7825	45.9955
PARG00022	11.7389	3.96596	34.1286	9.67853	7.34727	8.26602
PARG00023	40.0573	18.4495	65.6872	23.7763	26.1731	25.0904
PARG00025	3.7215	7.10651	8.18902	23.098	15.4834	2.4838
PARG00027	305.617	311.645	826.754	373.608	258.028	321.367
PARG00028	160.4	48.264	29.9195	75.0144	25.9879	107.168
PARG00029	124.67	125.384	130.584	147.073	160.269	158.892
PARG00030	1044.33	1234.95	645.896	1113.85	740.694	1276.16
PARG00031	3.18244	4.44838	2.26243	0.726451	0.622178	0.793483
PARG00033	782.95	555.32	464.674	664.372	394.456	1552.37
PARG00034	248.94	296.337	173.365	220.827	160.897	136.663
PARG00035	500.579	500.318	425.454	517.823	591.405	512.632
PARG00036	607.886	845.324	513.689	606.966	516.582	326.265
PARG00037	1379.17	1637.66	1251.64	1352.61	1338.2	1088.13
PARG00038	3.95347	1.56169	7.62728	3.67027	4.56641	7.8483
PARG00039	70.8661	89.3484	69.4036	70.0191	71.6504	102.534
PARG00040	11.578	4.6564	3.53118	7.11703	1.20753	2.51047
PARG00041	13.0611	20.0723	28.809	29.2846	55.0179	58.7562
PARG00042	52.2176	48.5708	67.4184	41.9743	44.6784	94.5343
PARG00043	26.7675	33.8229	55.4416	29.0223	28.1247	43.3092
PARG00044	473.601	110.931	81.0058	248.061	78.9766	147.902
PARG00045	226.622	176.529	84.8747	312.656	126.604	666.246
PARG00046	306.566	350.271	63.5968	308.985	455.117	43.5035
PARG00048	456.729	318.362	271.031	704.679	745.562	982.718
PARG00049	400.774	417.486	382.264	386.669	423.113	393.474
PARG00050	6.05904	8.9545	5.79725	3.29802	8.4354	6.50858
PARG00051	18.5352	28.9374	15.7642	23.1354	22.5235	21.7943
PARG00052	27.7794	41.7023	21.7158	31.6146	33.3321	29.7245
PARG00054	9.09495	12.1573	3.62186	6.93827	6.49997	4.15734
PARG00055	8.4423	11.8689	1.95142	2.93781	3.68283	1.48982
PARG00056	831.393	655.716	500.146	829.532	693.905	803.61
PARG00057	61.605	23.8676	34.4638	35.3208	173.405	40.227
PARG00058	128.935	79.9169	267.744	91.6192	112.806	302.1
PARG00059	379.931	619.146	432.875	343.825	359.119	282.219
PARG00060	112.034	221.329	163.409	111.305	124.419	95.5858
PARG00061	39.9204	33.4555	174.357	32.8776	50.26	108.475
PARG00062	17.6187	9.29276	19.8637	40.6682	31.6868	26.6137
PARG00063	129.595	153.357	103.038	126.671	111.123	97.0787
PARG00064	54.9194	58.3817	58.5881	51.2154	55.7292	29.0508
PARG00065	243.606	304.951	291.543	325.033	383.141	334.947
PARG00067	7.84317	5.03593	4.14792	3.07131	1.44676	1.75435
PARG00073	182.158	217.728	191.807	170.773	195.393	217.982
PARG00075	42.69	36.7686	49.8572	45.7265	32.1222	37.2338
PARG00076	1.93223	1.78158	15.196	3.12742	1.42467	15.4939
PARG00079	61.4285	18.127	40.6817	95.9023	78.0043	119.469
PARG00081	547.551	633.124	396.762	481.817	503.346	512.127
PARG00082	313.579	376.295	369.957	403.027	432.512	320.073
PARG00086	1.51018	5.14632	3.57868	2.28315	5.02384	14.7268
PARG00087	631.735	664.791	875.131	739.422	796.281	389.583
PARG00088	2.28983	0.935614	1.87543	0.554789	0.509581	0.518336
PARG00091	5.9302	1.61121	2.67134	3.49688	5.98905	3.05424
PARG00092	134.898	161.764	161.502	148.237	148.466	86.5994
PARG00094	450.305	453.393	382.316	528.459	455.261	385.029
PARG00097	0.806429	0.238916	2.52747	1.62917	0.204482	37.0181
PARG00098	326.536	298.44	711.503	349.086	291.287	215.572
PARG00099	175.943	169.204	230.678	180.513	148.374	128.261
PARG00100	63.6523	78.0905	65.9196	62.4206	74.5094	92.1753
PARG00101	1.4191	82.3775	12.9199	3.37386	16.0807	9.69921
PARG00102	0	1.61828	2.18584	0	0	2.44263
PARG00103	105.114	132.912	91.2168	145.347	74.1292	107.393
PARG00104	0.502352	0.570632	4.69315	0.784565	0.903409	39.3971
PARG00105	181.068	141.489	158.004	180.057	149.494	102.765
PARG00106	100.685	49.3847	232.536	109.607	66.1288	75.6678
PARG00107	876.541	565.713	2503.25	803.755	261.186	309.078
PARG00108	5.1029	2.75726	4.34495	3.16927	1.2511	3.23339
PARG00112	41.8649	23.5551	216.556	34.8678	36.1333	63.6963
PARG00114	19.5292	18.1815	54.6972	13.3692	5.71351	11.4676
PARG00115	8.71672	4.1158	7.36197	1.47171	9.08831	12.9565
PARG00116	1.68846	2.91842	1.68715	0.635654	4.06567	11.4208
PARG00117	52.508	15.1317	38.5291	5.81523	10.9015	14.6563
PARG00118	30.0724	19.9295	27.3085	53.4126	44.9908	71.2059
PARG00119	130.349	80.3551	122.34	181.957	139.55	228.084
PARG00120	528.344	719.448	509.951	507.941	560.91	692.317
PARG00122	392.214	380.729	367.231	364.038	369.166	393.456
PARG00123	335.716	275.717	213.323	250.786	173.383	231.787
PARG00124	19.5816	13.8619	11.0929	8.96901	18.7209	31.1484
PARG00125	58.6838	78.9949	61.8336	59.8143	62.8472	136.225
PARG00126	168.593	93.6556	187.96	193.869	105.377	91.2466
PARG00127	325.547	289.737	493.205	320.204	259.567	268.816
PARG00128	203.51	162.771	196.831	271.123	228.78	144.442
PARG00129	10.3779	7.72978	84.0214	21.0104	2.21732	4.40522
PARG00130	0.748118	0.354624	2.20092	1.16483	0.264073	0.526685
PARG00131	0	0	6.65924	0	0.37253	31.1099
PARG00132	0.259763	1.56545	0.961644	0.294929	0.252015	2.42147
PARG00133	1443.27	910.211	3008.11	1404.04	1259.6	1515
PARG00134	44.908	40.5948	50.1335	34.6444	42.9495	20.0751
PARG00135	1.82582	0	1.47213	0.383823	0.892363	1.43241
PARG00136	16.2714	7.76003	43.7129	7.20879	4.60712	40.5123
PARG00137	13.5933	9.09008	44.0966	5.99436	4.1825	40.7677
PARG00138	9.33696	7.19664	33.8826	5.57283	3.48196	34.5587
PARG00141	369.102	519.316	302.12	466.33	411.333	298.936
PARG00142	62.3256	87.778	45.463	15.8243	17.8092	21.6073
PARG00143	47.2249	19.7679	142.11	48.9164	21.1714	269.529
PARG00144	0.227445	0.134767	2.21429	0.363863	0.263652	1.05671
PARG00145	8.03763	2.28253	3.42315	0	0.697835	0
PARG00149	1.25978	0	0	1.48572	2.09565	1.29348
PARG00154	1.45592	1.72534	3.10828	3.42537	3.77323	1.49487
PARG00155	0.621043	0.183993	0.590037	0.130555	0.451015	0.65357
PARG00159	3.0777	1.82362	1.74768	3.62967	4.25378	4.67138
PARG00161	222.831	46.8392	516.584	106.422	54.6874	149.342
PARG00162	39.8466	31.9976	34.5492	45.2326	41.8965	7.08046
PARG00163	0	0	0	1.52472	2.97085	2.52135
PARG00166	0	0.331959	0	0.128423	0.276624	2.02012
PARG00167	541.316	351.504	1395.37	530.819	127.933	206.504
PARG00168	75.4295	485.754	49.9233	65.9067	72.695	100.821
PARG00169	85.5738	236.047	86.2519	63.9521	141.535	78.9883
PARG00170	67.4732	94.177	79.5596	47.2008	58.9345	46.949
PARG00171	189.585	282.16	119.846	219.358	176.298	184.915
PARG00172	180.764	697.252	552.65	125.229	105.777	213.392
PARG00173	1548.57	1882.23	2393.42	1563.7	1387.01	1083.02
PARG00174	469.799	341.598	847.31	636.983	675.793	373.29
PARG00175	477.431	472.914	307.534	406.887	351.454	308.439
PARG00176	733.656	427.774	185.568	635.303	138.605	199.431
PARG00178	38.5748	61.2265	64.7002	32.4362	25.2005	33.6957
PARG00179	2.77872	11.8707	9.22476	4.50645	4.32336	2.17539
PARG00180	21.6658	17.7743	17.4228	20.9554	17.0527	18.5538
PARG00184	125.362	180.637	117.681	109.389	118.908	113.662
PARG00185	5273.59	4615.25	3507.9	4437.42	3497.21	3999.21
PARG00186	671.525	565.364	471.97	493.456	399.115	505.684
PARG00188	0	0.667271	0.697307	1.45553	0.85123	2.46278
PARG00190	228.751	212.596	409.091	255.415	327.857	261.946
PARG00191	257.327	254.921	122.583	519.351	232.442	235.049
PARG00192	277.846	305.491	292.779	236.443	236.28	204.487
PARG00194	13.6272	4.0383	46.3164	10.0374	9.20235	29.5364
PARG00195	141.557	187.179	161.498	105.381	125.428	94.8899
PARG00196	124.617	84.0672	168.06	142.805	156.046	169.637
PARG00197	261.228	349.273	443.731	359.457	496.626	523.537
PARG00198	194.969	240.497	320.046	223.893	366.27	607.679
PARG00199	91.7329	81.3995	67.415	79.4427	93.6898	85.703
PARG00200	57.9264	10.4282	33.8112	54.1048	43.8856	95.0806
PARG00201	124.989	62.9872	84.2536	168.543	89.3636	154.383
PARG00204	592.079	506.317	421.84	591.301	448.61	566.458
PARG00205	262.086	339.63	263.161	224.648	195.451	235.546
PARG00206	673.99	765.738	600.077	707.401	641.573	553.274
PARG00207	761.539	746.565	787.026	813.927	707.093	952.438
PARG00208	553.471	561.853	525.586	556.444	540.902	505.017
PARG00209	340.969	384.266	392.518	327.411	352.968	231.793
PARG00210	36.3571	15.5987	13.04	33.0951	1.78813	70.6809
PARG00211	91.9983	454.668	122.496	172.782	150.357	231.339
PARG00212	40.1707	8.56148	11.6365	18.9861	3.18217	52.2567
PARG00213	80.4985	403.148	106.215	148.141	131.486	210.285
PARG00214	108.415	524.159	135.446	206.262	183.772	271.34
PARG00215	7.07545	36.3736	15.3514	11.2248	12.9783	29.3398
PARG00216	210.247	983.16	297.654	332.183	279.072	437.789
PARG00217	1.92882	15.257	5.27637	6.66656	5.13626	5.56708
PARG00218	44.8395	49.1967	70.9295	30.3998	36.5671	27.3815
PARG00219	854.608	869.346	920.537	595.329	763.422	588.922
PARG00220	376.452	573.768	391.745	401	438.858	359.784
PARG00221	2.44185	2.79089	48.69	3.71375	2.10921	16.0956
PARG00222	178.703	213.017	135.999	137.814	102.729	103.115
PARG00223	0	0.493377	4274.91	0	3.9061	1285.63
PARG00224	98.2264	84.8875	132.693	95.4749	91.2338	121.947
PARG00225	1353.88	1995.67	1451.52	1195.37	1399.84	1456.85
PARG00226	410.701	454.698	303.02	350.615	335.412	341.87
PARG00227	80.4026	96.1423	81.6657	184.792	212.902	271.356
PARG00228	331.074	334.331	267.7	397.327	392.753	625.1
PARG00229	47.5705	96.2174	31.1807	2.44064	1.00085	2.17431
PARG00230	25.8279	48.3387	18.4645	3.64768	5.96718	8.94049
PARG00233	65.2262	177.088	220.833	163.993	152.204	133.802
PARG00234	210.178	230.887	200.993	202.163	229.45	215.805
PARG00235	170.889	208.34	157.92	223.747	233.856	268.696
PARG00236	116.374	147.484	106.728	167.967	173.706	179.083
PARG00237	609.053	680.811	626.677	530.267	688.435	767.383
PARG00238	10458.3	9678.29	12876.7	11103.6	11991.1	11884.3
PARG00239	55.5574	59.3014	47.6363	44.0642	56.7774	87.0205
PARG00241	0	0.347986	1.84066	0.894902	0.341136	0
PARG00242	314.123	377.371	267.27	257.044	248.573	226.367
PARG00243	1.97353	1.67648	65.8305	3.2336	1.51591	19.5076
PARG00244	82.1783	74.1112	71.1831	64.54	63.1078	54.6708
PARG00249	77.3442	17.7055	74.2686	63.1332	36.0355	61.8485
PARG00250	256.19	342.602	274.285	280.572	389.824	483.595
PARG00251	4.75853	5.13612	84.4059	6.32897	8.11587	116.698
PARG00252	85.7449	110.768	81.271	78.0682	82.7354	95.0286
PARG00253	13.6104	12.8712	16.33	10.2477	11.9735	11.1007
PARG00255	0	0.535562	7.20545	0.340276	0.81856	1.85907
PARG00256	7.85651	5.39143	6.08248	4.68704	4.84199	4.45279
PARG00258	1.04952	1.17498	0.548225	1.07736	0.660937	1.45588
PARG00259	83.291	104.917	82.388	103.923	117.217	114.022
PARG00260	0	1.66794	2.40731	1178.67	1248.08	1144.39
PARG00261	0.931564	1.65593	3.54022	35.3043	36.4716	37.4986
PARG00262	2.61439	0.710321	2.04847	39.4783	48.9203	117.536
PARG00263	110.517	10.8438	46.4172	24.1638	246.546	448.363
PARG00264	2562.73	476.722	435.011	546.868	6245.51	6006.82
PARG00265	137.204	128.208	124.489	179.383	182.952	341.034
PARG00266	15.4799	5.51699	18.9326	10.3277	9.72206	21.9831
PARG00267	1122.06	1114.27	591.297	1187.01	1173.73	814.165
PARG00268	375.108	477.054	473.528	525.172	543.551	409.01
PARG00269	612.774	268.816	941.513	1032.73	1410.68	629.376
PARG00270	7.15113	7.34594	4.81833	12.9469	14.7798	31.0723
PARG00272	0	0	5.86166	0	0	0
PARG00273	202.054	234.846	224.934	256.849	253.351	183.798
PARG00274	6.37044	5.45332	3.32765	8.77778	10.4281	15.3234
PARG00276	1.37366	1.56037	1.6951	3.24825	2.64585	3.56122
PARG00278	6.53817	7.44692	5.27462	8.67218	12.5344	23.0715
PARG00279	706.435	663.556	372.293	599.56	634.189	535.771
PARG00280	125.161	111.434	255.841	89.5903	141.424	1600.19
PARG00281	266.321	324.203	212.948	204.79	331.01	289.859
PARG00282	388.965	126.026	319.998	286.542	249.059	833.76
PARG00283	238.282	289.649	480.852	292.814	354.487	318.394
PARG00284	331.439	60.195	444.586	189.269	96.558	178.746
PARG00285	241.894	177.19	273.968	245.713	204.335	168.153
PARG00286	149.045	128.262	107.033	149.239	142.572	114.746
PARG00287	386.811	729.511	367.52	449.539	361.818	557.041
PARG00288	314.166	298.274	262.236	254.438	249.397	457.74
PARG00289	757.388	688.167	682.599	759.612	939.801	973.173
PARG00290	76.66	56.7856	70.0429	58.852	108.366	107.118
PARG00291	16.9601	11.3815	18.5981	20.1675	21.0093	36.2977
PARG00292	0	0.993381	2.25589	0	2.38674	1.87701
PARG00293	165.364	178.035	133.834	196.67	202.578	283.215
PARG00294	68.3416	84.7684	69.6296	90.5282	77.8214	126.033
PARG00295	50.0579	70.9859	58.2181	69.0596	67.3755	74.0904
PARG00296	174.223	187.96	130.192	187.631	185.683	181.008
PARG00297	769.792	634.651	582.998	396.172	397.351	369.203
PARG00298	707.373	962.107	652.039	763.705	740.754	926.654
PARG00299	1180.76	572.656	1942.46	1471.44	579.105	1358.99
PARG00300	198.931	209.726	196.785	214.934	179.764	146.757
PARG00301	4.40613	1.34532	7.72053	4.07598	1.69211	7.47777
PARG00302	340.829	362.928	261.09	300.96	306.352	308.144
PARG00303	51.9348	19.5823	25.5646	36.3669	14.6216	11.899
PARG00304	73.5271	56.7207	71.8172	48.9537	52.009	52.8114
PARG00305	149.196	268.578	139.492	163.976	142.61	267.11
PARG00306	304.217	424.173	336.167	212.438	244.738	248.886
PARG00307	7.9457	10.1235	11.766	11.8336	11.2283	18.0717
PARG00308	1.99294	2.26382	4.45067	3.10064	2.57334	0.972058
PARG00310	142.106	180.827	142.567	134.021	215.691	174.007
PARG00311	198.35	157.408	225.732	259.3	263.215	355.669
PARG00312	181.489	122.566	151.923	263.023	415.029	286.492
PARG00313	16.0487	33.1789	30.9352	28.7271	16.4883	73.6908
PARG00315	62.5213	52.692	48.3974	64.9294	49.1216	36.3599
PARG00316	601.137	652.449	621.779	652.23	684.94	642.959
PARG00317	261.616	400.008	335.629	306.06	441.255	493.314
PARG00318	20.0051	9.75418	3.72788	14.264	4.40701	2.13637
PARG00319	252.98	226.984	306.387	224.314	188.662	203.271
PARG00321	393.924	272.919	250.241	290.412	534.14	472.018
PARG00322	155.143	174.499	119.352	114.684	450.09	438.725
PARG00323	523.804	321.424	652.55	651.306	347.384	564.234
PARG00325	8.01555	30.3095	7.43753	11.3611	22.874	21.4182
PARG00326	69.7283	237.015	56.0937	91.1068	130.476	126.952
PARG00327	206.931	721.101	149.88	180.833	233.681	260.147
PARG00328	455.07	505.127	362.126	155.666	127.54	136.398
PARG00329	54.2133	54.4091	71.7653	58.7815	48.5222	68.227
PARG00330	175.717	211.966	212.075	200.844	182.395	159.168
PARG00331	0.348336	0	1.0575	0.292908	0.606629	2.48919
PARG00333	447.074	437.097	273.536	523.681	496.53	584.843
PARG00334	661.895	434.897	505.56	477.233	1773.38	1137.06
PARG00335	201.686	245.547	137.984	140.839	163.522	237.784
PARG00336	4966.51	7043.4	5997.21	4970.31	4931.64	3702.83
PARG00337	74.1642	91.055	79.8188	78.0783	73.2434	116.791
PARG00338	70.051	54.6651	237.897	62.7025	110.145	681.301
PARG00339	1171.54	1414.96	1431.24	1221.37	1245.5	1027.88
PARG00340	234.661	163.703	477.27	221.449	210.948	175.816
PARG00341	0	1.13886	2.69189	0.771581	0.577428	0.51799
PARG00342	1853.3	2336.39	2127.6	1747.35	1859.32	4479.89
PARG00343	291.047	189.638	169.492	274.682	250.33	535.188
PARG00344	1594.74	1703.74	1501.36	1293.06	1272.4	1115.95
PARG00345	48.4424	47.7687	94.9635	114.739	85.8946	561.815
PARG00346	388.599	441.209	254.147	475.16	523.587	692.062
PARG00347	299.851	215.972	298.712	285.848	229.655	202.884
PARG00348	14.7171	124.333	23.349	6.03357	15.3105	105.617
PARG00349	5.51135	6.36712	7.3636	12.9862	20.2315	13.8964
PARG00350	0	0	4.17024	0	1.37089	6.99075
PARG00351	286.653	456.335	255.462	269.419	314.955	511.34
PARG00354	0	0	2.85705	0.190696	0	0.273024
PARG00355	186.737	171.646	269.441	191.601	154.622	99.0469
PARG00356	5.96252	10.2083	69.9093	8.2052	13.3732	927.752
PARG00357	90.9126	80.4022	91.6837	221.07	141.297	147.272
PARG00358	274.981	231.772	192.851	269.753	250.207	237.689
PARG00359	130.85	172.212	245.382	166.041	240.752	125.754
PARG00360	2.87345	2.03034	1.93103	2.18938	3.06358	1.90293
PARG00361	512.686	1593.2	373.577	823.686	331.156	108.295
PARG00362	395.332	1097.18	391.607	403.473	493.492	215.226
PARG00363	1441.68	1264.6	1365.26	1799.03	1471.23	946.609
PARG00364	142.207	122.269	107.875	204.803	261.178	280.638
PARG00365	408.826	428.182	135.065	805.662	693.829	1338.79
PARG00366	15.9571	6.49808	15.3075	8.94713	4.92717	4.93718
PARG00367	6.60702	3.06695	32.9225	0	0.56524	21.6578
PARG00368	271.678	171.019	176.137	190.244	140.66	65.519
PARG00369	517.863	244.025	178.691	286.288	195.804	83.4868
PARG00370	57.5057	22.6707	56.8628	31.1339	24.3838	57.875
PARG00371	21.9373	13.5427	34.4472	15.6084	14.4884	31.5526
PARG00372	2324.59	1084.08	824.159	1789.12	3481.24	4912.75
PARG00373	1726.62	771.919	540.148	1222.36	2295.77	3236.24
PARG00374	87.5872	66.3198	100.28	89.5207	100.529	37.652
PARG00375	638.572	603.326	793.046	635.239	520.686	1507.13
PARG00376	108.496	91.957	124.38	72.9887	59.1851	68.4736
PARG00377	592.013	654.95	367.069	524.213	633.244	548.095
PARG00378	0	2.11182	1.22085	0.923587	1.57045	3.47358
PARG00379	105.251	99.6767	138.417	331.174	152.481	308.77
PARG00380	151.156	155.168	111.785	127.493	133.008	157.879
PARG00381	24.6591	25.8654	32.8905	81.43	41.4848	125.993
PARG00383	18.2751	15.3437	9.69655	12.5208	9.1234	11.3047
PARG00384	26.7031	20.5792	28.7232	79.5093	39.1666	124.89
PARG00385	9.83797	14.299	9.6077	10.4389	10.3369	9.27625
PARG00390	547.164	570.176	749.867	675.156	674.172	661.344
PARG00391	78.7338	68.2632	85.1847	98.3045	82.6634	84.0298
PARG00392	27.8675	14.035	19.8022	39.3118	30.2752	52.1015
PARG00393	133.921	108.491	174.323	125.582	91.5089	115.722
PARG00394	32.503	42.686	23.8162	22.9269	19.6098	30.9017
PARG00395	81.2102	83.8408	101.861	78.968	79.4755	57.3406
PARG00396	144.459	144.716	133.904	174.333	179.619	176.101
PARG00397	259.239	299.452	272.878	269.246	278.66	142.845
PARG00400	3.22038	16.5405	16.8101	5.55531	10.4118	40.4238
PARG00401	24.8576	69.093	60.0316	33.9818	39.541	81.9743
PARG00402	692.539	665.126	706.628	699.945	678.816	541.674
PARG00403	34.7524	150.099	801.518	43.699	106.041	534.602
PARG00404	570.719	911.597	211.638	434.064	1472.67	3308.77
PARG00405	52.1593	86.4387	80.5736	39.3056	86.7385	140.498
PARG00406	0	2.0671	0.959623	0.565903	2.67337	3.20914
PARG00411	111.637	17.9586	25.7785	170.244	38.7944	48.3962
PARG00412	0.527034	0.936846	0.774097	7.10632	47.7282	0
PARG00413	848.883	674.229	558.446	730.924	1047.81	1522.83
PARG00414	356.79	255.451	352.421	333.299	372.876	660.514
PARG00415	311.007	479.295	311.704	324.802	408.299	548.784
PARG00416	247.17	255.378	278.798	258.748	234.071	204.387
PARG00417	2.10327	0.976329	1.37581	19.9425	8.54922	1.1135
PARG00418	77.3622	82.603	63.6668	52.8806	52.2341	48.4057
PARG00419	2.01178	2.46964	0.422124	1.67801	0.833653	0.295086
PARG00420	79.5097	84.1729	99.5165	74.0853	71.28	81.2069
PARG00421	371.128	351.271	546.511	425.638	453.996	416.305
PARG00422	383.045	318.666	290.235	306.97	341.307	380.274
PARG00423	26.6063	18.3216	84.5228	35.2959	35.1419	47.0774
PARG00424	139.226	324.056	201.326	129.191	139.36	160.796
PARG00425	110.017	149.342	115.932	91.5583	144.481	274.066
PARG00426	145.568	260.623	116.743	220.828	154.903	160.595
PARG00427	31.7137	46.4058	90.7304	35.1984	39.3187	81.3665
PARG00428	1.99022	1.71999	12.4753	3.52073	1.5647	18.4307
PARG00429	32.9679	73.3375	28.0367	17.2233	74.0959	47.3203
PARG00430	31.7713	23.5891	24.9546	36.892	34.9897	47.2741
PARG00431	117.939	84.3008	64.7246	125.959	122.139	158.66
PARG00432	1167.99	1118.56	789.105	1098.15	956.578	925.133
PARG00433	93.9398	100.531	113.036	84.448	94.5467	53.0119
PARG00434	112.717	67.7927	134.836	99.2339	85.8794	158.461
PARG00435	5793.93	5797.56	8533.22	6228.84	5975.2	3905.68
PARG00436	219.844	443.161	362.93	219.793	346.291	228.71
PARG00437	471.643	366.323	313.114	514.217	409.643	610.111
PARG00438	656.991	433.48	479.068	625.026	614.86	685.362
PARG00439	954.476	883.78	869.362	1150.35	1127.27	1075.35
PARG00440	605.86	490.671	315.918	701.02	272.07	474.316
PARG00441	577.228	438.074	405.099	643.953	524.456	463.598
PARG00443	53.7362	119.076	59.9893	55.9092	85.8174	65.8795
PARG00445	30.8006	18.9463	22.3217	30.3016	24.4613	17.2544
PARG00446	3.45694	3.95512	3.17109	2.06036	9.90468	3.58276
PARG00448	5.97147	6.70889	29.873	12.7556	3.34034	16.702
PARG00449	100.135	93.3343	247.165	86.7122	63.4329	170.264
PARG00450	152.916	138.553	253.167	192.844	175.767	167.071
PARG00451	0.143614	0.248229	3.38129	0.224294	0.222259	0.940538
PARG00452	249.202	356.76	300.649	297.689	359.491	373.785
PARG00453	493.444	292.098	1329.72	522.95	471.087	828.853
PARG00454	177.71	304.511	164.948	148.069	157.125	278.095
PARG00455	77.0509	44.0929	467.831	54.6473	30.1433	361.128
PARG00456	110.179	246.182	4.9448	388.251	206.071	5.00311
PARG00457	12.7623	10.3598	55.0919	8.17084	15.9117	30.754
PARG00458	297.418	266.844	244.36	235.634	131.961	132.47
PARG00459	1.91447	2.17469	2.04363	8.19002	11.2211	4.49639
PARG00460	70.3626	86.484	66.5209	81.6427	66.3265	48.7266
PARG00462	338.34	734.529	198.84	353.228	897.578	1344.93
PARG00464	225.268	358.142	229.65	244.035	258.707	367.241
PARG00465	229.183	165.945	147.088	253.12	254.059	689.34
PARG00466	130.653	107.236	99.139	116.462	96.7053	143.172
PARG00467	47.9948	41.0918	93.5309	28.7342	18.0602	53.8583
PARG00468	2.99554	3.42723	6.0927	0.798705	0.997179	100.075
PARG00469	47.3774	78.8578	121.086	64.7936	62.2425	44.8621
PARG00470	5.14035	2.71596	3.12107	3.66302	3.19056	6.619
PARG00471	813.33	786.012	455.956	604.723	568.151	644.984
PARG00472	273.624	194.287	183.267	264.601	195.224	123.119
PARG00473	249.373	307.218	263.724	307.742	249.05	533.519
PARG00474	20.289	29.7449	96.915	11.2566	6.17269	16.6681
PARG00475	396.979	151.504	149.449	319.731	168.16	397.565
PARG00476	118.235	90.183	78.9485	101.139	72.2869	95.7426
PARG00477	123.482	80.5068	76.2598	104.657	120.822	33.1192
PARG00478	0	0.2945	7.65567	0.602826	0.609571	12.6322
PARG00480	408.269	111.144	32.327	251.078	95.9575	63.4028
PARG00481	903.236	672.292	402.833	728.422	651.185	616.556
PARG00482	407.497	795.265	487.16	330.23	470.007	338.491
PARG00483	702.645	949.073	611.969	678.61	742.539	999.198
PARG00484	0	0	4.28756	0.280922	0.157106	2.9039
PARG00485	3202.45	2658.39	3891.58	3420.88	3043.9	3241.21
PARG00486	154	139.804	95.0808	203.108	141.236	100.679
PARG00487	184.102	316.573	317.923	170.834	215.526	301.77
PARG00488	18.0847	29.1362	21.8271	14.2855	15.3151	45.7199
PARG00489	44.9692	325.56	57.1941	120.87	100.13	26.6531
PARG00490	11.7203	9.05687	27.211	63.2403	43.8124	8.95843
PARG00491	24.8286	12.8913	59.3129	23.3768	18.6758	9.01426
PARG00492	678.151	575.605	610.894	563.023	573.831	481.772
PARG00493	255.267	149.821	237.22	276.274	166.673	126.669
PARG00495	0	0	17.0986	0	0.892812	3.15787
PARG00496	495.47	685.316	296.566	615.059	718.8	790.558
PARG00497	114.589	50.878	61.8658	93.3322	28.4583	22.9439
PARG00499	767.938	1293.92	1252.54	741.594	656.964	444.905
PARG00500	78.9501	85.4813	63.1643	102.984	230.719	153.09
PARG00501	560.221	784.526	850.205	681.315	802.219	1029.5
PARG00502	447.393	346.359	511.66	422.81	519.015	443.587
PARG00503	2.9651	4.97933	2.67134	3.51458	1.49533	6.39275
PARG00504	330.756	484.767	99.8793	260.131	324.803	210.83
PARG00505	2.72373	1.56035	3.30754	4.39805	7.06754	30.1537
PARG00506	25.3365	13.7816	24.8366	21.187	20.7573	10.0812
PARG00507	180.649	281.444	264.152	193.262	226.099	94.937
PARG00508	1531.04	902.79	802.246	987.043	304.978	23150.5
PARG00509	1231.12	231.041	365.351	364.155	6034.47	7050.14
PARG00510	66.7114	68.5616	34.1558	56.3611	154.753	462.256
PARG00511	87.2566	121.617	252.148	116.55	105.372	98.1802
PARG00512	1919.35	2052.63	2532.42	1756.59	2126.62	2395.58
PARG00513	7.62369	4.56701	248.416	3.73096	3.69199	100.045
PARG00514	0.797175	1.61405	10.9536	0.944902	1.59776	7.85816
PARG00515	79.4412	26.52	48.4191	92.3802	42.6155	17.8147
PARG00516	173.194	154.905	314.04	162.104	202.088	324.591
PARG00517	80.1839	104.201	56.2197	84.2891	29.0177	19.6397
PARG00518	3.02035	0	3.22412	0	0.382927	2.29217
PARG00519	188.268	131.1	133.284	204.85	178.637	402.12
PARG00520	25.4333	37.6429	28.2513	28.9993	23.8906	31.9206
PARG00521	308.194	309.195	247.798	320.993	272.217	457.721
PARG00522	146.866	118.546	134.749	129.925	141.769	229.636
PARG00524	5.89823	15.9249	11.4258	4.11511	5.59341	10.4997
PARG00525	167.486	243.3	194.455	165.065	134.337	290.463
PARG00526	260.727	403.353	264.959	76.9888	70.6416	39.6587
PARG00527	22.161	34.774	30.3718	0	0	0.961039
PARG00528	153.632	238.314	175.01	169.61	250.321	270.563
PARG00529	47.2818	49.8373	68.3345	34.5912	243.882	532.223
PARG00530	152.045	279.322	247.548	130.725	181.33	197.482
PARG00531	10.6484	13.1473	8.16897	19.0607	74.6676	24.6629
PARG00532	15.229	10.7372	10.5117	17.3252	72.3318	33.4521
PARG00533	65.2322	57.8951	65.3535	79.8313	58.4275	41.3669
PARG00534	5.69855	2.06437	23.886	0.798632	0.659672	1.95033
PARG00535	6.59358	8.38551	8.24898	10.4445	38.2778	11.8979
PARG00536	46.9214	33.0052	20.4416	66.0496	311.448	141.787
PARG00537	22.8836	26.5603	14.7908	34.9031	179.298	71.97
PARG00538	45.2778	21.1164	24.5868	54.7017	259.454	75.9341
PARG00539	5.40307	4.90997	4.00044	2.95566	2.38531	3.27677
PARG00540	147.303	140.065	113.426	128.933	107.996	66.7909
PARG00541	65.1192	61.2747	163.628	55.4025	43.5672	109.261
PARG00542	4.33369	4.81548	21.6677	10.535	3.15466	13.4591
PARG00544	212.953	367.726	123.753	345.988	397.83	330.914
PARG00545	272.899	234.707	250.402	236.403	252.38	157.264
PARG00546	183.848	205.105	139.864	226.72	149.874	78.4043
PARG00547	124.534	124.108	65.2507	106.502	83.2888	241.69
PARG00549	32.4049	95.0603	15.0897	16.3175	26.1986	32.2063
PARG00550	77.3622	83.9514	102.151	51.9466	52.3974	51.8948
PARG00551	220.255	128.888	130.615	232.44	202.519	225.677
PARG00552	60.1195	49.2918	33.7327	32.3403	58.7975	218.982
PARG00553	1893.22	1102.52	1030.55	2448	2416.36	3688.8
PARG00554	1483.25	1139.38	903.455	1388.22	1189.41	1105.97
PARG00555	2052.04	862.427	1108.44	1922.9	1057.18	5054.45
PARG00556	321.7	154.242	270.456	302.315	176.77	202.609
PARG00557	169.95	209.479	294.484	152.828	154.567	101.434
PARG00558	627.636	640.988	836.234	498.603	540.021	218.668
PARG00559	0	0.472348	69.1994	0	0.276846	14.7976
PARG00560	276.608	332.211	246.195	279.233	260.476	193.839
PARG00561	933.79	479.57	565.135	939.192	737.406	1657.92
PARG00562	96.6911	41.2703	70.9372	101.305	50.9933	39.844
PARG00563	82.1196	49.1808	55.2345	79.9373	39.7672	35.8681
PARG00564	5.12887	3.11699	11.5963	2.00167	1.85762	7.71163
PARG00565	103.334	52.5125	73.5672	80.1345	44.1317	36.1525
PARG00566	49.0516	25.9909	17.5181	48.9707	39.4564	5.0673
PARG00567	2.74363	3.36805	5.39736	0.924484	1.98861	6.26784
PARG00568	47.4767	29.2749	28.6883	29.9906	16.0023	14.0106
PARG00570	169.557	157.502	233.76	219.479	242.308	237.925
PARG00571	40.9018	36.2481	108.018	60.1867	53.3174	101.883
PARG00572	70.5101	37.8298	33.8135	53.7476	45.6007	50.6643
PARG00573	269.139	256.521	242.905	233.027	232.906	109.048
PARG00574	367.983	284.623	314.247	319.045	252.287	162.176
PARG00575	22.5449	18.0884	51.2983	14.8509	14.2657	199.915
PARG00578	55.5378	230.286	29.6626	50.0383	37.3498	83.244
PARG00579	30.0522	21.7499	27.4923	25.8953	28.2497	15.9841
PARG00580	242.148	274.836	231.193	230.89	292.823	217.607
PARG00581	617.008	2328.45	417.381	506.196	1484.69	603.301
PARG00582	308.739	404.161	347.661	314.538	299	204.913
PARG00583	680.628	358.442	324.272	647.498	912.179	457.934
PARG00584	82.0052	45.8293	41.5084	71.9398	133.48	88.4833
PARG00585	457.858	325.708	239.257	461.953	796.578	402.007
PARG00586	10.7042	12.084	4.49204	9.66004	13.5151	12.7376
PARG00587	6.28129	7.09647	4.87444	3.01853	4.38365	6.19227
PARG00588	77.6271	24.9026	60.2349	78.9149	55.6493	48.8773
PARG00589	2.79469	0	1.58698	2.22712	3.83041	4.23257
PARG00590	17.7607	11.6151	13.5015	12.3426	10.5792	4.72124
PARG00591	89.1247	36.4872	41.8806	71.9219	81.806	70.5092
PARG00593	24.8441	17.1076	43.0879	17.656	23.0142	43.1077
PARG00594	27.9946	22.3266	40.0877	19.0893	29.2399	136.029
PARG00595	0	2.81822	0.826358	0.934022	2.1484	7.65855
PARG00596	56.0785	55.336	87.2687	30.9654	65.0246	141.4
PARG00597	4.67343	2.64549	8.415	3.41907	3.46125	13.9163
PARG00598	16.2092	17.4358	9.73281	6.17249	5.18292	1.04186
PARG00600	88.1111	25.8849	49.395	71.2222	198.418	156.566
PARG00602	437.649	807.306	200.553	583.774	849.326	637.885
PARG00603	1412.59	1652.51	2459.65	1491.5	1815.41	3478.2
PARG00604	15.4374	16.1375	40.895	10.9732	8.36111	183.385
PARG00605	3.0973	22.0005	15.4292	4.60796	4.60299	238.786
PARG00606	471.029	1204.86	266.574	315.601	244.044	1176.53
PARG00607	118.053	165.316	147.092	108.786	79.137	56.8589
PARG00608	14.2111	16.1934	23.2601	7.66779	9.49681	14.3059
PARG00609	2.96109	3.02216	4.29172	3.25104	4.09583	5.60245
PARG00610	17.4114	9.45944	6.28478	5.86689	7.54784	19.7937
PARG00611	753.684	998.922	622.15	632.083	723.304	801.286
PARG00612	691.931	761.116	508.203	801.342	601.208	746.092
PARG00613	215.086	261.517	167.358	223.48	192.913	263.124
PARG00614	498.795	530.924	393.047	458.984	377.277	596.515
PARG00616	2.28418	0.451147	6.83052	1.82028	1.51568	15.9676
PARG00617	3.28565	3.73224	3.50732	0	0	0
PARG00618	1308.4	1469.43	1128.27	1406.14	1193.64	1108.37
PARG00619	290.688	178.875	416.856	245.905	242.313	165.48
PARG00620	675.718	246.035	63.2431	1404.68	1543.23	1937.42
PARG00623	0	0	10.4352	0	4.01852	17.0806
PARG00624	7.23295	8.6004	7.20293	8.96357	10.7748	9.44933
PARG00625	0	0.531609	1.91544	0	0.884719	2.76951
PARG00626	15.333	5.80571	13.5868	12.9998	11.1092	52.783
PARG00627	606.48	197.629	617.951	677.219	373.707	790.462
PARG00628	17.4891	8.57783	19.7441	10.975	5.81172	8.83292
PARG00629	487.177	152.82	550.655	920.955	470.567	951.278
PARG00630	536.281	315.889	587.747	443.461	631.835	978.101
PARG00632	518.215	235.454	564.206	605.219	297.651	762.606
PARG00633	529.612	502.478	477.838	564.84	499.442	625.099
PARG00634	570.353	443.034	424.985	585.851	484.237	557.344
PARG00635	285.405	141.075	1776.01	299.144	346.031	1654.64
PARG00636	11.4296	24.6057	28.0352	20.6955	23.1446	20.253
PARG00637	26.1258	30.9654	39.121	29.4895	32.5884	20.8142
PARG00638	432.823	603.515	776.24	498.953	567.746	380.323
PARG00639	107.117	169.877	259.193	148.35	171.15	120.997
PARG00640	162.9	188.127	207.728	125.894	133.511	171.997
PARG00642	6.20025	8.81462	5.77702	6.91772	9.32413	4.79327
PARG00643	87.523	159.026	63.1262	111.532	87.5548	76.5247
PARG00644	266.395	150.775	265.047	205.767	137.49	196.811
PARG00645	726.038	729.042	653.696	775.211	767.569	663.977
PARG00646	740.658	358.188	162.144	940.193	820.504	1719.15
PARG00648	5.31902	4.57121	7.79316	3.87957	1.45515	5.42849
PARG00649	16.2092	11.6659	67.9469	1.94714	1.51328	7.13265
PARG00650	123.148	24.7975	10.9483	42.7453	842.869	298.801
PARG00651	5.17316	5.00706	12.7674	8.6688	31.2564	9.06246
PARG00652	127.385	117.291	186.523	134.296	246.49	132.178
PARG00653	556.487	499.375	524.999	567.452	563.601	442.628
PARG00654	93.5191	77.0347	79.6584	68.7898	105.799	140.02
PARG00655	1424.3	904.064	892.086	1184.94	1339.63	1215.11
PARG00656	495.231	524.353	378.747	457.395	377.083	485.364
PARG00657	172.022	190.173	190.528	176.112	177.547	306.851
PARG00658	24.1898	104.207	38.6024	15.6184	149.151	172.758
PARG00659	56.2538	80.029	72.1044	48.0272	61.6463	140.615
PARG00660	88.1124	168.454	73.2996	53.7991	40.6951	116.646
PARG00661	77.5591	52.2045	36.1208	37.3095	255.551	344.423
PARG00662	250.496	242.456	192.449	270.227	171.874	190.761
PARG00663	539.877	523.407	471.059	526.262	816.064	1572.05
PARG00664	237.37	187.897	174.565	295.118	323.642	277.055
PARG00665	463.307	820.612	640.464	406.87	470.834	473.875
PARG00666	69.3225	54.2527	46.2566	69.6787	95.1808	67.629
PARG00668	67.3441	33.9311	81.5435	47.4785	55.1901	58.5975
PARG00669	6.63859	1.65977	7.93148	11.0766	13.7605	13.7422
PARG00670	11.4115	4.82677	4.32242	3.88056	5.75956	3.48564
PARG00671	0	0.249911	0.720711	7.66064	4.62642	2.61047
PARG00672	0	1.89561	3.1967	11.4786	2.21768	0
PARG00675	0	0.256543	1.74777	0.35829	0.357803	0.484743
PARG00676	2.88591	0.819542	4.8284	1.05937	0.556632	0.117301
PARG00677	2.61184	1.19621	3.69232	26.5638	17.2433	14.6691
PARG00679	6.08221	5.8183	5.07867	4.03454	15.445	10.2864
PARG00682	3.8365	2.20254	3.83216	1.6261	2.08739	3.07686
PARG00683	59.6098	74.2965	56.0508	71.1103	58.0661	52.5628
PARG00684	3.7358	2.12179	2.44649	3.2603	4.06182	2.8687
PARG00685	22.475	16.2462	32.375	22.3293	23.0019	37.8423
PARG00686	13.681	12.4104	20.6607	17.9886	12.4784	18.7698
PARG00687	93.1215	101.701	130.045	27.6896	30.3228	27.999
PARG00688	389.897	463.228	288.228	435.331	430.712	350.197
PARG00689	3.19919	2.55954	3.73469	0.485577	1.04139	1.9751
PARG00690	4.94519	6.43207	3.79373	0	0	0.846246
PARG00693	169.403	102.304	271.587	161.84	284.356	384.035
PARG00694	65.0921	17.0213	217.148	20.1407	37.4467	22.262
PARG00695	187.243	152.917	216.638	216.051	120.567	233.078
PARG00696	594.291	625.165	505.951	588.777	507.179	477.36
PARG00697	246.87	291.254	193.369	249.108	263.699	207.989
PARG00698	10.0487	7.48836	11.8966	9.92983	9.42004	4.84308
PARG00699	0	0	2.99937	2.56949	2.81757	3.40957
PARG00701	447.114	557.251	546.891	697.39	1359.16	1109.37
PARG00705	3361.4	2581.56	1180.37	2408.4	2111.97	4359.87
PARG00706	776.643	1075.11	1231.35	766.004	701.937	689.351
PARG00707	54.0307	71.769	59.4597	39.5342	33.9115	36.3879
PARG00708	7567.06	4716.03	5621.3	6869.11	7837.27	3715.03
PARG00709	55.8183	68.876	75.6858	58.5133	53.5655	60.2128
PARG00710	5380.21	3694.59	12200.8	5162.85	3950.92	55330.9
PARG00711	3.07554	2.89871	8.06203	3.36806	2.64857	21.4573
PARG00712	194.985	212.628	285.469	233.383	138.11	153.896
PARG00713	101.933	230.996	89.7293	117.416	156.264	225.359
PARG00714	111.846	100.322	57.4718	82.0357	58.9311	61.9373
PARG00715	153.87	95.0297	88.5501	137.172	140.223	207.661
PARG00716	871.571	835.505	1333.35	774.15	725.986	410.924
PARG00717	125.449	37.3978	83.0619	104.727	48.5215	68.8428
PARG00718	995.181	883.494	798.907	1349.16	1329.89	971.748
PARG00719	171.496	103.23	115.53	148.964	140.411	141.887
PARG00721	53.9109	47.1537	59.8823	14.2986	17.6689	22.997
PARG00722	74.4996	61.7345	65.0556	10.0127	9.55355	7.93699
PARG00723	0	0	0.5661	0.696299	0.581518	3.12043
PARG00724	0.374059	0.831423	17.0114	1.16617	0.788263	18.3492
PARG00725	202.84	154.806	123.589	245.95	185.909	186.035
PARG00727	138.928	137.314	284.722	114.267	133.193	159.325
PARG00728	45.8289	41.3973	88.0042	46.1503	59.8541	62.1512
PARG00729	11.3263	13.7854	14.2722	11.55	10.7434	5.97467
PARG00730	1272.89	1441.83	3155.57	1633.83	1445.81	699.416
PARG00731	2341.43	2039.82	1404.07	2637.68	3045.74	3383.96
PARG00732	518.309	473.27	318.491	589.076	726.13	865.199
PARG00733	234.25	238.15	147.245	260.809	223.723	148.918
PARG00734	4.27094	1.20537	5.82003	4.29666	3.62897	6.61815
PARG00735	424.335	272.345	437.553	410.181	338.719	414.685
PARG00736	2422.61	2211.84	3860.31	2960.79	2790.38	3112.72
PARG00737	2761.94	1477.9	2513.91	2297.6	1200.57	814.632
PARG00738	178.077	213.307	138.558	196.287	172.503	156.359
PARG00739	28.8539	22.1524	30.4731	36.1588	30.5692	30.2044
PARG00740	2294.51	1895.49	973.016	1998.97	1611.91	1344.37
PARG00741	0	0	0	0	0	46.8013
PARG00742	4118.44	3240.88	5320.43	4048.05	2077.87	2551.22
PARG00743	37.5163	41.5632	38.4953	32.8313	29.8751	28.8625
PARG00744	2948.7	3176.98	1905.7	2667.96	2353.78	1578.12
PARG00745	3813.55	2259.26	6156.05	3338.35	1710.92	2673.84
PARG00746	357.109	265.748	238.966	281.068	248.059	215.419
PARG00747	542.582	701.298	585.994	453.712	435.26	549.117
PARG00748	43.9965	32.2892	53.3223	38.2389	28.5992	21.0661
PARG00749	51.2823	35.0114	55.6342	42.8392	31.4982	25.767
PARG00750	3.13846	3.71071	3.08458	2.22832	2.38724	2.65742
PARG00751	48.8119	36.4798	34.5623	26.0347	23.609	20.8751
PARG00753	1855.64	2019.47	1922.45	1755.58	1643.69	1264.17
PARG00754	156.064	148.724	61.7601	204.642	1815.46	2566.17
PARG00755	17.6645	19.5549	18.4975	26.778	16.6843	14.133
PARG00757	60.8275	35.9735	43.9902	42.3824	30.617	20.4706
PARG00758	212.528	1182.7	185.958	131.802	348.388	180.749
PARG00759	103.23	128.832	59.227	73.5109	80.6072	59.0633
PARG00760	6.64312	9.97308	2.52459	5.25933	8.00344	5.46547
PARG00761	31.7729	25.4648	42.5486	27.6481	22.1557	158.009
PARG00762	66.6034	63.3511	177.276	42.4192	63.1753	102.742
PARG00764	2861.93	2663.57	3878.48	2559.13	2312.55	1740.21
PARG00765	3.0622	4.83968	24.3512	2.95893	3.02826	15.5991
PARG00766	4.12099	0	18.0011	1.64203	2.58162	11.4775
PARG00767	64.8946	93.2374	67.4757	61.7615	65.0797	43.4799
PARG00768	101.345	80.9805	189.113	101.088	102.267	247.695
PARG00769	84.2728	54.5571	50.3112	65.8208	47.1364	32.5038
PARG00771	0	0	0.517104	0	0	3.79116
PARG00772	22.2157	16.869	14.9757	18.3714	12.1724	5.16226
PARG00774	41.5621	51.3948	51.611	43.902	38.9749	25.9772
PARG00775	14.9624	18.0124	28.5736	16.133	17.8156	11.5467
PARG00776	2.42331	2.23437	19.7769	1.60118	4.38509	2.40534
PARG00777	206.201	20.1154	116.519	266.013	221.044	83.1897
PARG00778	208.625	52.1122	113.829	133.47	707.497	1531.88
PARG00780	89.0292	114.034	235.351	90.8267	50.369	102.39
PARG00781	62.7497	71.0626	103.488	82.6789	87.8981	82.4848
PARG00782	491.488	524.796	275.256	376.313	452.134	1041.88
PARG00783	231.006	314.791	252.021	267.475	322.531	304.555
PARG00784	608.864	648.79	653.42	591.659	599.047	617.834
PARG00785	25.3521	10.3028	34.6186	13.4402	9.10063	11.4026
PARG00786	1.3072	1.5491	0.435393	2.03375	2.07122	2.68866
PARG00788	11.9088	8.38152	12.2841	8.51082	7.71862	3.11099
PARG00789	2.00941	2.28253	15.1519	4.63923	5.61607	6.29912
PARG00790	10.1644	6.57389	12.8177	8.7417	7.44433	6.70465
PARG00791	18.5659	17.3525	26.3201	14.9662	14.2184	15.3255
PARG00792	25.9662	19.9366	22.5173	6.35274	12.1944	8.42251
PARG00793	18.1649	18.2987	26.5744	16.3187	13.6891	13.9009
PARG00795	85.3774	82.7966	81.9503	87.983	73.4469	69.2107
PARG00796	206.222	235.514	160.178	281.55	210.577	191.435
PARG00797	38.2345	27.278	35.0769	28.2615	19.4353	17.0705
PARG00798	26.6002	25.9651	32.4408	30.9492	27.9922	15.886
PARG00799	44.2279	44.1302	51.6793	43.35	42.5989	21.3162
PARG00800	69.8985	51.1145	91.0781	68.2255	26.8209	61.057
PARG00802	7.12783	6.33631	18.9105	31.9929	18.9799	59.4858
PARG00803	220.23	148.596	292.231	188.614	173.772	146.704
PARG00804	11.9332	10.2396	13.5853	10.4238	9.68292	8.39518
PARG00805	27.1985	22.3479	41.4664	22.9376	21.7724	20.5438
PARG00807	58.095	7.22664	98.9576	19.5033	11.0616	29.3426
PARG00808	11.24	7.07037	11.2279	9.99721	10.7532	16.3324
PARG00809	2.91184	3.30761	14.4284	7.52689	6.14738	9.83819
PARG00810	8.01115	7.04268	10.7803	7.21434	6.58634	6.74397
PARG00811	13.2372	10.6404	16.3073	13.2286	11.9811	14.7445
PARG00812	4.63121	15.0592	5.20074	4.32418	3.71283	3.59121
PARG00813	6.54011	5.66213	8.12302	16.9439	15.9447	14.259
PARG00815	30.2426	31.1587	32.403	30.9557	24.8869	19.3243
PARG00816	8.159	13.7817	15.9488	14.1281	16.9731	12.6347
PARG00817	32.9382	32.8061	33.4779	35.4769	28.6682	27.3506
PARG00818	25.9598	27.0774	29.5139	26.4523	26.5627	12.6922
PARG00819	81.561	61.4618	108.217	84.7704	33.3728	72.3236
PARG00821	6.22368	5.34807	18.201	28.5606	16.9965	52.4355
PARG00822	15.812	12.7839	17.7346	12.1355	9.0129	8.59322
PARG00823	9.8227	8.07506	12.1333	9.61461	8.79963	9.76958
PARG00824	227.677	261.563	220.678	221.739	274.06	329.175
PARG00825	1.69631	0.642293	1.43409	0.989527	0.497908	0.5815
PARG00826	150.232	121.301	31.2467	234.398	132.856	62.7743
PARG00827	9.53484	9.10376	18.6598	3.77374	3.70814	5.62934
PARG00828	85.1871	67.8955	87.2493	94.3776	71.0568	71.9226
PARG00829	0.714412	0.988068	13.4754	0.273218	0.93564	6.86337
PARG00830	1.60487	0.475466	2.35721	3.7854	5.3873	0.82656
PARG00831	269.039	366.522	243.324	254.412	248.612	134.616
PARG00832	98.547	110.903	132.798	131.911	167.142	102.065
PARG00833	87.9382	87.6614	105.314	102.043	80.5602	99.0356
PARG00834	58.9633	21.4174	102.812	97.2414	59.4565	161.642
PARG00835	0.940574	0	0.847389	0.752358	0.263907	0.229383
PARG00836	299.089	166.887	145.677	131.214	681.543	861.683
PARG00837	358.902	249.753	234.463	279.937	287.928	214.454
PARG00838	76.1674	58.9945	57.6028	64.8788	52.8641	71.2025
PARG00839	177.459	82.0475	165.763	179.059	129.014	143.139
PARG00840	19.0046	16.6257	18.8958	15.1977	18.2685	7.9303
PARG00841	37.215	20.667	27.5043	33.0518	23.278	14.4939
PARG00842	31.4917	29.5308	27.5074	26.2456	37.6132	12.687
PARG00843	590.43	2097.63	428.361	613.053	804.483	647.324
PARG00844	27.6841	14.5197	24.6251	29.7345	47.9947	31.7631
PARG00845	390.521	484.752	407.647	447.032	451.236	537.383
PARG00846	3786.4	2877.36	3250.38	3787.44	3381.02	3019.1
PARG00847	22.4254	34.159	42.6308	22.546	22.1227	15.7659
PARG00848	59.5313	52.5822	94.2034	55.9267	48.5703	48.8774
PARG00849	9.11769	5.17848	4.25656	4.85305	2.89275	5.5049
PARG00850	1224.28	543.418	548.279	529.679	4787.64	7158.88
PARG00851	2.58331	9.21289	10.0329	1.59167	8.25378	24.6128
PARG00852	28.3013	24.4393	36.9805	28.6067	23.7676	12.8512
PARG00853	21.8795	17.8739	30.1894	16.6726	18.0591	8.20151
PARG00854	0	1.23482	4.1122	0	0.286848	1.09553
PARG00855	1.96608	1.10055	6.25143	0.522262	0	4.71241
PARG00857	44.5335	28.343	78.1055	34.9122	19.971	33.1497
PARG00858	265.318	576.98	338.911	240.697	324.658	285.534
PARG00859	374.902	350.407	250.212	327.502	273.057	315.511
PARG00860	409.935	441.736	272.118	443.259	421.64	387.771
PARG00861	259.463	357.038	307.926	153.134	187.709	115.815
PARG00862	5149.77	5223.11	6460.33	5079.4	4659.15	3257.93
PARG00863	921.651	436.88	707.425	979.924	588.082	567.399
PARG00864	1311.39	1595.24	493.048	1411.54	1916.13	1085.08
PARG00865	346.429	369.509	155.636	358.642	466.854	310.838
PARG00868	1.83732	18.1178	5.18328	0.925913	4.50479	7.25729
PARG00869	91.2572	83.6727	148.67	92.5228	241.913	268.702
PARG00870	8.02415	7.00764	9.62183	5.16613	11.9967	8.69539
PARG00872	0	0	4.06703	0	0	0.37648
PARG00874	0.394919	0.682597	2.62209	0	0.419037	2.64576
PARG00875	301.745	721.019	313.823	247.223	1482.52	1095.86
PARG00876	9.19983	23.8863	14.467	3.54477	3.33626	3.91355
PARG00878	1939.25	1459.5	2370.82	1633.76	1319.35	831.809
PARG00879	247.204	287.278	366.567	309.549	260.079	140.196
PARG00880	46.3659	867.275	78.9015	55.043	30.8029	106.707
PARG00881	39.5787	35.5927	54.7505	37.0982	38.8498	30.2223
PARG00882	7.68383	4.60841	5.49311	7.50142	7.31509	5.10351
PARG00883	13.604	9.90075	5.75235	7.87933	10.8002	5.1495
PARG00884	6.15677	5.48942	3.44664	5.12502	7.24466	3.80339
PARG00885	0.906106	175.074	15.3175	0.380962	4.77912	21.765
PARG00886	48.4871	98.4936	133.974	66.4594	84.5855	84.9738
PARG00887	89.47	114.998	120.139	109.93	151.308	108.972
PARG00888	50.4095	48.5219	78.7127	60.4346	57.915	69.7251
PARG00889	0	0	0.393267	24.867	17.7256	0.448191
PARG00890	565.702	796.807	604.234	564.665	677.049	568.785
PARG00891	7602.13	8270.13	7630.64	8898.84	6642.68	5224.71
PARG00892	519.29	628.151	667.823	437.929	474.854	431.553
PARG00893	189.108	371.137	148.824	189.481	421.999	370.274
PARG00894	130.527	218.338	116.197	91.6976	200.075	125.947
PARG00895	5496.01	8492.94	3653.97	6127.74	6570.63	6366.4
PARG00896	799.527	974.687	177.175	861.807	357.101	406.359
PARG00901	0	0	10.9557	0.297077	0.196969	0.79758
PARG00904	12.6306	5.04255	22.6263	0	0.112559	0.283661
PARG00905	2.81265	1.04963	10.7742	8.25358	6.42917	13.6226
PARG00907	612.985	571.6	476.028	461.117	403.204	379.927
PARG00908	623.069	789.119	468.632	620.468	790.001	878.271
PARG00909	229.012	208.799	229.848	234.888	192.228	154.101
PARG00910	73.9701	91.59	127.26	70.5766	78.7841	59.458
PARG00911	40.9842	33.962	40.8641	52.2189	52.3486	32.509
PARG00912	7.33818	12.613	17.6218	11.5518	11.6247	7.97615
PARG00913	102.911	112.865	157.583	140.26	132.898	79.3858
PARG00914	377.69	285.732	271.67	415.698	388.298	1188.82
PARG00915	255.803	296.052	367.036	348.795	316.339	191.457
PARG00916	69.1166	110.737	76.2748	40.9893	121.101	257.384
PARG00917	240.342	211.09	147.966	128.172	708.483	1504.1
PARG00918	3.28565	5.51764	2.59535	13.1402	3.17666	7.29217
PARG00919	1.02159	0	1.50049	0.390694	0.555741	2.70083
PARG00920	18.1242	40.6841	20.6121	36.1864	29.2062	72.2524
PARG00921	0.779289	4.38776	2.96153	3.34856	6.03545	15.6214
PARG00922	464.323	708.852	335.105	568.546	445.538	366.817
PARG00925	1.70027	1.46941	1.24866	2.43232	1.15499	0.829309
PARG00926	9.38429	4.25603	6.11619	5.24433	3.66272	5.63932
PARG00927	10.4516	15.8122	38.0132	8.45905	14.1795	19.5944
PARG00928	183.43	234.718	135.606	186.426	231.844	205.575
PARG00929	310.907	404.144	259.228	238.037	249	167.307
PARG00930	544.004	1069.63	900.782	547.39	610.104	519.936
PARG00931	0	0.376409	3.78608	0.812801	2.21402	3.56304
PARG00936	146.611	197.188	177.035	163.54	241.739	259.752
PARG00937	566.238	876.574	579.15	613.254	686.234	612.573
PARG00938	779.259	2132.1	960.075	560.035	1160.57	1878.91
PARG00939	162.645	324.443	153.776	192.901	296.849	348.182
PARG00940	207.603	272	205.154	190.097	184.543	128.254
PARG00941	106.438	119.622	147.236	106.803	110.364	137.919
PARG00942	333.666	312.624	518.654	384.508	418.485	618.608
PARG00943	378.375	365.649	616.908	283.282	202.659	366.366
PARG00944	1651.1	2663.82	2424.76	1753.21	1934.12	1520.47
PARG00945	93.662	40.8914	71.571	46.8132	37.8846	18.2164
PARG00946	433.761	447.058	419.735	473.583	467.509	467.693
PARG00947	52.1011	67.4201	144.441	23.6395	22.4781	32.7947
PARG00948	217.112	64.6843	433.582	157.678	80.1724	360.034
PARG00949	216.41	65.1501	437.018	148.499	73.4291	327.67
PARG00950	2106.73	2922.84	3630.46	2605.81	2730.51	1862.68
PARG00951	1.71224	1.4377	2.11291	1.33708	1.00016	23.3756
PARG00952	166.484	214.163	343.525	205.654	75.4241	2815.4
PARG00953	305.739	295.113	246.951	305.763	185.791	132.688
PARG00954	521.011	648.603	595.689	515.089	449.869	496.342
PARG00955	777.619	726.886	519.548	915.97	831.418	1001.51
PARG00956	21.3372	23.1843	7.90937	35.2786	70.0179	29.1284
PARG00957	100.577	110.349	287.153	121.106	132.418	133.492
PARG00958	215.25	226.46	169.968	214.812	226.852	123.46
PARG00959	0.345367	0.392309	0.115033	0.669408	0.459654	0.354606
PARG00960	201.753	183.867	203.087	200.305	216.631	216.1
PARG00963	177.379	126.456	180.843	202.199	241.394	207.995
PARG00964	0.810461	0.46031	40.0199	0.480325	0.102752	16.6932
PARG00965	54.772	32.7736	36.3105	104.442	88.6025	97.8353
PARG00966	6.38438	1.49779	5.88843	1.6991	1.40288	4.60763
PARG00967	2.12813	1.49779	4.04376	1.45519	1.14787	4.92166
PARG00968	39.505	45.2683	54.0647	47.3766	54.3197	25.4607
PARG00969	60.7307	153.933	211.904	24.3654	23.1575	121.075
PARG00970	8.99859	7.33311	7.44957	16.9901	9.77442	12.5655
PARG00971	219.237	224.455	202.521	188.303	165.626	112.814
PARG00972	263.542	201.13	327.029	304.847	139.083	247.482
PARG00973	1.89952	1.68828	1.71133	1.07267	2.45154	1.43841
PARG00974	167.665	181.672	160.612	215.977	225.356	175.609
PARG00976	32.713	22.1806	51.7331	33.8692	52.4428	22.2287
PARG00978	18.4997	13.3576	13.2517	45.6827	33.7459	38.8412
PARG00979	326.478	298.146	158.694	314.811	236.374	369.709
PARG00980	5.98863	5.44208	11.3073	7.06981	3.28929	1.81793
PARG00983	2.20035	8.25825	13.3179	0.876738	3.02002	11.5017
PARG00986	189.442	443.674	135.952	53.5058	117.091	139.862
PARG00987	45.4341	19.415	24.042	42.2529	27.2204	13.6151
PARG00988	28.945	18.7738	22.7164	12.0088	12.3204	19.1014
PARG00989	42.7996	40.0733	33.1397	29.2388	26.622	15.4688
PARG00990	1.20118	0.667466	15.0455	1.26998	0.704242	12.3356
PARG00992	3.05872	2.57685	7.68647	1.4753	2.2891	6.68121
PARG00995	212.238	171.144	128.344	75.9908	62.4335	78.3378
PARG00996	257.058	186.592	127.052	95.8173	75.0455	91.727
PARG00997	1941.68	1562.97	3978.46	2338.28	2627.63	1794.11
PARG00998	538.597	472.02	343.096	720.343	581.414	295.638
PARG00999	189.392	221.707	160.092	181.294	231.333	197.364
PARG01002	184.662	120.984	216.807	128.36	102.738	151.239
PARG01003	1448.07	1284.65	1167.77	1397.36	1251.65	1283.11
PARG01004	0	0	0.150526	7.9432	4.37537	8.19172
PARG01006	219.027	90.6856	174.188	214.48	257.96	130.09
PARG01007	0	0.299514	0.792133	0.596142	0.175547	1.80525
PARG01008	173.181	213.463	161.223	149.255	271.693	228.185
PARG01009	137.59	82.4684	43.1206	71.5972	16.6019	11.6175
PARG01010	130.792	155.272	76.4321	75.0679	121.499	255.839
PARG01011	450.571	756.079	176.67	544.197	120.218	116.392
PARG01013	1285.81	2671.53	1393.46	1464.12	2022.98	1879.27
PARG01014	442.588	545.163	240.022	541.412	428.8	322.292
PARG01015	6680.88	10212.3	1854.88	5241.34	14607.9	10954.3
PARG01021	125.235	307.503	343.657	136.257	201.648	377.925
PARG01022	2.67512	3.8609	1.07115	1.05163	0.470021	1.36868
PARG01027	2.59915	3.60601	1.06438	1.01531	0.591102	1.21617
PARG01028	292.92	228.72	179.43	292.747	242.378	235.013
PARG01029	75.495	27.4174	23.1053	49.2921	26.4312	33.5883
PARG01030	235.129	174.375	164.215	253.975	196.343	167.852
PARG01031	64.816	53.6073	101.053	51.7786	36.2006	122.09
PARG01032	121.098	106.382	201.373	119.914	68.042	360.91
PARG01033	517.752	521.828	363.463	510.048	446.875	590.193
PARG01036	0	3.06873	30.0033	0	0	22.052
PARG01040	0	0	0.110482	7.46579	4.09359	10.4998
PARG01041	82.0345	0.537072	52.8173	23.543	86.381	26.7413
PARG01043	4.7533	5.65541	74.6763	25.0146	1.90446	22.4304
PARG01046	287.441	58.4803	273.346	228.294	368.21	282.327
PARG01047	93.0816	237.837	138.535	108.691	116.265	87.3292
PARG01048	0.274113	1.24548	61.7122	0.428105	1.1037	130.998
PARG01049	12.0366	11.4529	15.9046	14.0236	8.95661	6.47317
PARG01050	2.582	1.48762	1.49206	0.493726	0.5738	0.629687
PARG01051	5.52587	6.54846	2.02907	0	0	0
PARG01053	183.104	176.717	118.822	196.853	178.019	105.882
PARG01054	4.53053	7.63998	5.89458	18.8619	15.2639	27.7253
PARG01055	0.75744	0.411588	4.27222	0.8645	0.54612	3.52158
PARG01056	29.8368	27.2775	37.4391	23.0529	22.1215	19.3911
PARG01058	20.8702	4.09744	9.92264	45.3888	53.6978	25.2899
PARG01059	157.806	110.933	191.04	169.115	139.671	104.446
PARG01060	1.99294	2.6248	5.20514	1.817	1.32251	1.33012
PARG01061	52.4416	38.2592	62.0968	8.52424	6.07053	21.9367
PARG01062	74.8829	58.8103	98.4679	13.4184	10.8679	28.0973
PARG01063	59.845	45.7907	44.2197	27.995	23.2319	15.2651
PARG01064	414.481	415.333	333.161	341.955	282.764	530.119
PARG01065	193.665	140.795	207.592	171.902	175.121	95.3532
PARG01066	74.44	61.6992	72.4269	75.5621	58.9855	44.2014
PARG01071	40.3321	49.7615	35.6382	57.3089	114.086	96.8389
PARG01072	0	0.299514	0.623769	0.596142	0.175547	1.03801
PARG01073	158.503	58.9282	116.976	152.158	176.427	85.9967
PARG01074	1.25007	0	2.87699	0.999921	0.348984	0.946616
PARG01075	97.7633	87.2852	101.672	102.124	93.2877	78.9047
PARG01076	0.813172	0	3.12135	0.310987	0.541079	2.50747
PARG01077	2.0318	2.34124	5.55807	2.39215	2.33995	4.87441
PARG01078	24.5267	19.6591	31.6763	23.0771	19.0811	20.9562
PARG01079	1534.41	1111.45	3197.89	1759.79	1583.48	2668.2
PARG01080	486.042	257.282	793.678	488.585	406.974	486.419
PARG01081	2.93645	1.30537	0.391223	2.50124	0.473721	3.33545
PARG01082	244.113	272.18	211.089	249.025	268.675	203.47
PARG01083	1438.31	1230.19	2779.24	1397.41	610.071	628.799
PARG01084	202.837	295.648	243	218.492	204.756	551.776
PARG01085	2507.84	1333.47	1577.22	1784.52	1109.54	1143.37
PARG01086	69.8005	157.963	93.6638	86.1279	117.015	114.727
PARG01087	22.1099	22.1441	50.1749	22.3015	23.2568	12.8144
PARG01088	122.617	67.2744	314.332	68.0529	49.6545	182.332
PARG01089	234.343	242.612	206.482	197.058	208.279	330.049
PARG01091	82.5753	63.413	109.377	186.038	182.559	216.59
PARG01092	118.695	26.7568	6.59728	139.885	74.4382	84.1236
PARG01093	0.488884	1.08665	6.49195	2.69877	1.17803	2.24792
PARG01095	18.8908	7.21632	45.4815	41.6019	30.1343	159.638
PARG01096	311.349	309.851	302.398	331.868	342.328	223.444
PARG01097	278.837	320.046	386.685	276.155	390.715	281.872
PARG01098	22.8836	12.8564	20.6165	14.4449	11.1569	7.26913
PARG01099	7.30568	3.94984	37.4612	10.0647	9.53598	40.1956
PARG01100	0.53437	0	0.35597	1.23373	0.759776	2.77425
PARG01101	166.53	179.974	198.15	140.826	165.82	134.594
PARG01102	479.548	453.878	540.312	576.196	722.104	542.616
PARG01103	230.49	815.081	310.93	161.819	294.349	364.6
PARG01104	499.214	281.457	1554.04	555.207	517.535	730.767
PARG01105	0	0	4.8448	0	0	4.8362
PARG01106	2.77081	5.1656	2.40175	2.71159	4.20783	3.29159
PARG01107	66.2477	76.1397	24.7367	57.6893	54.7557	76.3754
PARG01108	311.447	277.081	200.579	347.292	261.126	172.679
PARG01109	226.224	240.687	197.498	230.174	193.507	269.338
PARG01110	285.701	299.778	308.361	329.497	264.927	337.966
PARG01111	75.9491	74.2985	70.2676	82.5269	70.7384	53.9397
PARG01112	67.526	54.5488	50.7717	61.4547	57.4119	48.6183
PARG01113	31.0274	25.4049	15.0333	49.3599	16.4328	2.77202
PARG01114	50.5535	195.954	4.09447	28.4649	30.9076	31.0563
PARG01116	139.291	76.9679	109.241	176.139	237.785	80.7918
PARG01117	20.0941	13.6952	12.6723	16.6933	14.6072	24.8311
PARG01118	24.8463	21.9139	13.5568	26.5412	24.5356	35.74
PARG01120	1721.6	4331.8	2167.3	1239.03	2537.62	1428.67
PARG01121	111.053	70.701	73.8104	78.0714	290.931	190.465
PARG01122	288.785	356.133	291.727	255.586	291.271	146.252
PARG01123	13.3674	15.3389	25.597	14.2498	19.2672	17.8507
PARG01124	0.313054	0.525715	0.490579	1.41026	1.54684	3.35715
PARG01125	0.907233	0.739476	0.257587	0.554916	0.482037	0.688505
PARG01126	425.524	657.064	467.65	466.85	475.641	437.732
PARG01127	6.31528	8.61569	24.6464	7.75922	4.39799	8.89104
PARG01128	109.096	151.517	196.262	120.504	152.023	142.237
PARG01134	388.425	413.869	348.458	343.27	290.648	322.896
PARG01136	116.759	215.772	65.5074	208.502	312.538	272.031
PARG01138	470.855	883.625	525.128	575.875	424.164	243.068
PARG01139	161.227	131.928	204.075	144.413	138.466	155.363
PARG01140	413.002	408.482	374.333	453.938	649.622	642.033
PARG01141	5465.03	4348.98	4096.78	5953.71	5706.96	4372.72
PARG01144	1594.51	3155.1	1344.31	953.448	1596.66	13650.1
PARG01145	200.41	165.087	324.23	260.88	301.968	244.149
PARG01146	27.7755	14.2447	22.0481	34.438	18.134	41.6489
PARG01147	184.971	26.8328	114.159	213.097	141.249	56.7843
PARG01149	1.16334	1.2643	2.21052	0.934019	1.67985	8.81712
PARG01150	252.76	261.01	326.535	283.045	354.829	223.399
PARG01151	1182.06	1368.9	992.422	1260.88	1113.01	1053.5
PARG01153	3.17828	7.14246	2.75495	0.937073	6.66521	2.0192
PARG01155	23.5464	20.363	37.2731	20.732	19.4295	24.9593
PARG01156	154.038	95.5364	170.639	124.377	147.872	104.338
PARG01157	49.2468	48.2409	39.3111	40.9173	19.9826	37.6025
PARG01158	79.9173	71.2785	49.0686	78.673	37.4859	25.633
PARG01159	11595.5	3358.43	1934.4	9533.24	2662.02	1326.61
PARG01164	0.968679	1.10034	1.74542	1.87176	2.56542	3.98799
PARG01165	46.2878	45.8707	16.7604	46.8129	177.322	107.031
PARG01167	411.061	288.456	280.014	221.85	246.562	199.908
PARG01168	86.1571	71.9794	89.3147	83.6719	58.4348	78.7464
PARG01173	15.3583	22.1276	7.34379	14.3255	60.5326	42.3466
PARG01174	161.328	107.357	124.484	37.991	31.8484	37.4848
PARG01175	9.15645	10.007	13.5207	2.65254	1.74229	9.62703
PARG01176	24.5567	29.5738	29.4985	17.122	28.2569	18.2935
PARG01177	57.4937	10.4978	89.2785	35.2969	16.8557	62.8986
PARG01179	95.0894	124.588	95.7154	115.541	104.83	83.4849
PARG01180	11.2796	20.7351	4.51649	2.47682	0.31779	1.29097
PARG01181	73.7654	221.311	35.4942	19.8303	11.9458	8.31848
PARG01190	724.22	73.5093	65.1879	199.61	3515.49	2212.78
PARG01192	11740.6	4382.32	5626.87	11061.8	8885.07	5910.7
PARG01193	70.4024	77.9766	117.591	83.0103	109.925	114.158
PARG01194	0	0	3.01598	0	0	2.50067
PARG01195	628.2	485.216	464.765	461.61	387.384	255.647
PARG01196	0	0	5.62791	2.29906	1.58066	2.50816
PARG01200	117.628	47.3743	82.4092	82.3085	60.3422	119.977
PARG01201	75.9993	59.734	82.7896	58.5472	43.1423	58.0031
PARG01202	128.74	98.139	157.996	127.14	119.199	156.421
PARG01203	128.262	79.1733	210.253	132.757	118.844	203.742
PARG01204	683.566	430.927	575.739	610.468	704.193	669.067
PARG01205	2858.67	1752.06	2595.34	2654.7	2465.63	2070.77
PARG01206	289.479	94.1648	65.099	130.879	90.7882	88.119
PARG01207	359.235	61.0251	139.609	418.054	182.109	472.973
PARG01208	56.4867	51.7915	88.076	78.267	51.4369	29.3461
PARG01210	2.25128	0.852425	1.17598	0.286991	0.228714	0
PARG01211	12.319	11.5272	16.5469	0	0.450336	0
PARG01213	379.207	117.11	67.8527	70.9884	85.1795	208.558
PARG01214	474.808	241.844	121.904	172.326	329.356	404.192
PARG01215	313.902	170.892	83.7662	138.384	236.133	316.975
PARG01221	263.475	53.7215	73.1788	115.212	55.9356	110.84
PARG01222	88.2653	71.6552	90.8231	86.2222	116.865	104.571
PARG01223	290.108	401.48	287.665	299.881	330.68	376.476
PARG01226	105.793	150.835	92.8646	101.745	119.925	137.724
PARG01228	61.1916	62.9829	46.8673	62.6881	73.9769	38.4382
PARG01233	107.091	130.363	94.617	177.901	208.946	129.001
PARG01234	323.308	329.85	222.563	283.313	279.197	184.607
PARG01235	0	0	2.20613	3.36523	2.45475	2.71352
PARG01236	202.343	281.182	224.031	252.368	299.147	224.514
PARG01237	190.504	193.588	196.555	165.256	153.951	124.077
PARG01238	375.349	454.277	392.168	289.059	466.87	237.799
PARG01239	477.773	1337.2	242.149	515.27	544.054	852.231
PARG01242	8.17896	17.7002	10.6166	3.30798	6.97083	11.5142
PARG01243	1443.33	1714.91	1223.86	1380.21	1197.32	1499.66
PARG01244	20.2615	12.8681	8.15276	22.7321	11.0933	4.39351
PARG01245	63.7022	28.58	15.392	47.596	24.3755	5.5452
PARG01246	0	0	0	4.75896	3.10989	2.94587
PARG01247	4040.59	3798.51	3455.97	3778.36	3250.09	2583.77
PARG01248	0	0	19.0159	0	0.394893	4.3613
PARG01249	156.764	180.217	153.962	137.189	123.943	94.1489
PARG01251	122.367	75.6516	121.18	91.7363	153.444	85.2608
PARG01252	187.77	267.682	179.124	194.494	241.615	254.318
PARG01254	192.834	49.9534	131.572	381.495	474.569	519.269
PARG01255	72.4739	32.0973	85.3609	220.366	273.967	275.363
PARG01256	86.0044	93.9466	93.818	88.7295	68.0356	194.868
PARG01257	163.055	130.219	205.694	210.99	345.625	826.707
PARG01258	62.7428	57.5772	37.9771	175.107	158.222	169.071
PARG01260	2.9362	3.38845	7.7638	9.16242	22.3444	19.9885
PARG01261	1.39735	3.8652	8.53765	1.1219	0	1.50634
PARG01263	98.8911	235.46	26.8114	80.4022	29.4039	9.09237
PARG01264	0.893672	1.21817	2.83212	1.32523	0.940081	1.00476
PARG01265	82.7759	92.6802	147.641	86.3671	69.6422	41.9208
PARG01266	1139.03	650.122	466.118	707.766	2044.73	3059.3
PARG01267	236.477	273.332	224.757	162.395	210.85	129.383
PARG01268	491.051	672.812	485.542	469.807	617.599	593.62
PARG01269	6.64615	7.90488	9.94777	7.15893	7.05181	3.42891
PARG01270	108.928	57.7214	141.74	152.222	104.6	185.014
PARG01271	25.5397	45.4551	1.62041	68.0969	39.9783	2.07335
PARG01272	1.96873	3.37867	2.10155	3.29743	1.72401	3.43818
PARG01275	5.42028	6.15701	2.35074	6.87789	2.66609	1.5504
PARG01277	5.9302	16.8406	9.14735	11.6898	13.169	2.96844
PARG01278	23.1876	36.5149	13.3915	28.6822	15.291	6.53502
PARG01280	35.3894	147.501	96.1976	21.0016	194.801	728.842
PARG01282	1.47655	3.15958	3.64413	4.2848	3.26097	4.04442
PARG01285	3.44877	13.7961	5.63983	9.50876	8.58059	2.61159
PARG01286	185.086	239.383	132.193	180.885	221.529	241.711
PARG01289	61.9954	421.773	242.574	55.5569	519.311	2109.34
PARG01290	74.1559	106.643	133.128	68.5272	62.2154	77.2912
PARG01291	139.192	119.653	189.028	114.668	99.3822	72.0124
PARG01295	40.5231	35.0765	121.523	16.958	28.0264	4.84695
PARG01298	406.468	462.039	335.364	324.571	265.037	238.936
PARG01299	16.142	16.6418	11.2431	27.7394	11.4337	13.4245
PARG01300	13.9334	13.8895	12.8041	15.4752	13.1213	15.5644
PARG01302	19.8211	12.9209	12.1647	33.1577	18.9302	16.9256
PARG01303	11.5838	3.27177	21.2063	12.4693	10.267	18.1199
PARG01306	30.2393	28.2693	56.4129	8.15966	15.9832	5.82111
PARG01309	0	0.571946	3.19538	0.221266	0	0.283661
PARG01310	99.0683	70.4691	74.8394	84.8495	73.0606	76.5981
PARG01311	221.627	205.449	284.692	233.934	228.19	242.439
PARG01312	362.501	361.151	356.133	370.243	347.475	375.069
PARG01316	220.699	327.506	247.781	230.234	267.308	154.881
PARG01317	232.496	197.896	199.26	211.111	226.641	246.581
PARG01318	82.5492	77.7872	113.841	95.5372	105.345	57.6088
PARG01319	154.692	160.284	87.016	124.723	118.245	209.816
PARG01320	22.5426	19.0072	20.406	13.2928	13.6358	6.7009
PARG01321	0	0	1.82304	0.489114	0.354562	11.5041
PARG01326	0	0	5.38892	0	0	90.7565
PARG01327	0	0	0.461762	0	0	4.09128
PARG01328	0	0	4.16377	0	0	44.2145
PARG01329	66.3105	42.8349	72.4516	53.8785	55.5356	178.36
PARG01330	22.9002	41.1361	24.7856	23.9913	25.5326	40.6242
PARG01331	1.43869	2.41601	0.47919	1.08324	0.324794	3.03284
PARG01332	156.389	148.276	225.413	166.287	167.617	112.862
PARG01333	125.237	85.2206	161.238	94.0555	97.7575	101.959
PARG01335	113.465	133.436	97.0344	112.785	102.777	109.172
PARG01336	93.5147	104.642	69.1364	93.8581	74.8532	61.4444
PARG01337	230.881	330.506	257.17	168.57	144.123	170.866
PARG01338	200.966	147.055	134.823	216.403	250.299	210.601
PARG01339	233.298	215.615	206.971	233.595	222.657	263.721
PARG01341	756.646	841.691	1028.82	612.696	679.846	920.333
PARG01344	623.894	2510.38	710.693	536.387	2233.54	3226.78
PARG01345	296.289	1136.25	301.561	250.204	948.494	1416.13
PARG01346	16.4634	68.6403	20.6953	15.5707	57.8911	86.9821
PARG01347	43.8338	59.9261	18.3226	45.6219	187.832	137.854
PARG01348	174.946	117.731	164.898	236.768	166.339	253.287
PARG01355	2.37374	0.787055	0.64435	2.80755	4.16854	9.9553
PARG01356	0.880936	0.500337	0.543538	1.41194	1.25716	1.57451
PARG01357	8.10991	2.19102	3.54122	11.3413	8.79672	14.5569
PARG01358	16.2092	7.01582	7.33298	26.1531	18.1664	26.4127
PARG01361	2.85821	10.5018	13.565	3.674	103.838	139.215
PARG01363	115.307	186.816	63.4861	127.894	81.7098	118.138
PARG01364	44.9096	12.2869	14.86	67.6384	54.3913	29.6352
PARG01365	76.8929	185.322	1419.5	90.3643	823.045	15362
PARG01366	3.30052	1.18174	22.8535	2.72282	4.48888	19.4263
PARG01369	2.38371	1.35385	2.2647	1.34609	2.78986	0
PARG01370	0	0.109141	0.349999	0	0.100202	0.956276
PARG01371	42.0109	61.3256	59.4572	43.5874	45.3024	48.0961
PARG01372	24.501	1.46208	7.58925	16.6412	59.2795	110.472
PARG01373	4.95012	5.14826	3.10828	14.3715	21.6326	15.277
PARG01374	45.4053	77.2595	68.6263	58.1652	90.0331	58.794
PARG01375	3.87987	10.22	14.3633	14.2709	7.223	15.3252
PARG01376	1149.41	86.9147	380.881	647.182	1904.28	2687.81
PARG01377	24.5369	26.7695	12.4963	17.6598	73.8711	139.564
PARG01378	104.718	39.8592	157.121	95.6768	22.8278	172.892
PARG01379	187.18	233.811	144.254	171.081	192.606	216.014
PARG01380	1489.52	4848.32	1238.53	768.877	1274.42	1308.32
PARG01381	119.343	488.521	43.0029	137.548	134.818	82.4471
PARG01382	79.2649	132.001	24.3	52.0098	40.3983	45.7045
PARG01383	158.147	130.402	153.845	186.939	201.815	173.432
PARG01384	108.07	107.083	93.9682	169.012	164.164	129.033
PARG01385	55.9296	29.9741	15.3438	45.4689	46.058	46.4584
PARG01386	0.618673	0	0	0.236603	0.766266	2.21357
PARG01389	728.879	698.433	595.413	825.795	944.657	762.824
PARG01390	268.349	132.019	171.665	343.253	120.291	119.818
PARG01391	79.3627	531.921	162.512	71.138	58.0835	406.094
PARG01392	473.581	432.886	356.692	489.993	483.47	443.633
PARG01393	470.546	436.099	485.511	497.921	502.731	358.035
PARG01394	0	0	0.123638	5.36929	14.5002	38.1786
PARG01396	5.78901	9.86378	8.7873	4.50331	4.30228	1.56014
PARG01404	0	0.285356	1.491	0.200832	0.334888	0.540924
PARG01406	0	0.254566	1.33012	0.534691	0.510277	2.38723
PARG01412	0	0	0	0.971708	0.896058	2.07605
PARG01413	0	0.873128	0	0.563546	4.55421	0
PARG01414	2.8945	3.28793	0	5.703	5.04732	6.10179
PARG01416	84.7503	39.4068	67.5552	123.987	99.0888	117.2
PARG01417	439.606	394.166	362.278	460.658	436.823	366.227
PARG01418	387.742	171.262	380.923	570.568	499.085	460.643
PARG01419	343.33	175.777	208.887	373.909	214.857	155.618
PARG01420	258.897	380.039	263.291	322.398	356.074	428.076
PARG01421	783.446	1195.12	762.731	790.074	900.265	993.03
PARG01424	162.221	210.857	180.454	140.755	172.507	158.991
PARG01425	73.9087	141.422	97.5167	65.1836	64.3419	115.304
PARG01426	10.1308	8.79291	12.0193	0	0	0.780068
PARG01427	294.853	388.262	278.642	285.527	334.213	354.705
PARG01428	15.6144	2.53381	5.28593	23.2005	21.8536	12.7257
PARG01429	186.622	297.674	110.883	264.973	173.449	258.534
PARG01432	2.91766	1.12067	7.09282	5.3156	17.456	19.9216
PARG01433	2.48758	7.94423	10.8873	3.42616	88.6668	123.183
PARG01435	1.7845	1.27787	0.699112	2.29478	1.35938	1.61612
PARG01436	0.688777	0.408119	0.539683	2.06105	3.11363	9.92821
PARG01437	212.132	188.876	121.936	160.506	334.482	314.239
PARG01438	26.2589	9.26944	7.91503	49.0202	17.5628	29.7883
PARG01439	7.09968	1.08225	1.31803	5.89187	4.08495	11.2869
PARG01443	2.66697	1.03166	0.696556	3.71388	2.1589	4.13466
PARG01445	2.76294	15.7603	3.08513	2.69412	8.68652	9.86274
PARG01446	183.228	282.453	209.621	179.854	154.617	111.007
PARG01448	288.287	139.642	48.3687	257.657	97.8884	126.471
PARG01449	430.661	176.82	152.925	348.195	214.1	227.27
PARG01450	134.079	178.795	134.284	126.351	104.414	133.86
PARG01451	101.61	52.1093	1423.29	215.785	436.875	283.219
PARG01452	8.52182	3.6693	9.79034	12.9689	10.4739	14.2466
PARG01453	494.286	502.435	310.726	448.613	428.14	540.833
PARG01455	17.8655	23.6027	22.0674	21.5191	20.1902	16.5725
PARG01456	33.5604	46.7727	37.3349	69.6593	67.2256	38.3335
PARG01457	91.979	164.647	29.6515	127.638	130.619	90.8341
PARG01460	962.465	120.874	86.089	643.174	1582.97	316.008
PARG01463	18.3886	6.7604	82.3908	26.6585	49.627	8.49697
PARG01464	346.472	341.888	350.74	355.339	317.619	542.827
PARG01465	18.1447	24.7925	24.5701	28.2829	23.6479	20.6141
PARG01468	51.287	49.4405	35.1601	48.8196	41.7771	36.9716
PARG01470	222.696	137.208	159.382	177.318	156.691	120.169
PARG01473	92.1096	101.529	95.7677	65.7374	64.5975	657.307
PARG01475	41.3099	848.516	30.6439	27.5489	48.0473	36.3294
PARG01476	0	6.69776	0	0	0.353756	5.19047
PARG01484	195.287	7.17591	172.345	56.8734	46.2467	68.6797
PARG01486	0	0	2.94484	4.45221	12.4561	8.02177
PARG01487	1.43869	3.33916	3.0715	10.2896	9.8762	9.65756
PARG01488	667.249	678.195	435.01	574.181	624.349	742.092
PARG01490	405.905	565.676	375.079	498.211	543.719	536.612
PARG01491	137.244	201.524	195.599	152.949	210.826	216.549
PARG01492	3.45694	6.43145	14.8047	2.28414	0.538641	2.92832
PARG01493	1.56611	1.35347	11.0888	1.84932	0.84128	2.8166
PARG01494	673.212	601.996	445.486	539.001	482.274	422.007
PARG01495	335.94	287.645	328.565	360.51	285.799	260.83
PARG01496	1218.01	2354.25	2504.17	1064.14	2961.71	4337.13
PARG01497	124.559	102.045	64.6053	123.891	80.5643	60.6198
PARG01499	376.56	288.601	213.337	487.045	413.157	365.341
PARG01501	891.99	547.595	661.566	865.302	743.022	787.165
PARG01503	328.883	372.115	200.163	340.237	292.349	278.378
PARG01504	102.106	103.116	115.035	94.1777	111.591	86.478
PARG01505	446.601	472.292	353.308	464.364	499.229	541.221
PARG01507	271.953	148.313	312.328	352.933	248.904	186.012
PARG01509	0	1.40553	6.20717	0.543749	1.44784	1.95869
PARG01510	146.491	154.386	146.199	162.928	196.246	129.436
PARG01511	420.308	583.937	3792.17	505.415	596.557	1228.67
PARG01512	1124.68	965.264	1221.76	1146.96	1152.45	1077.46
PARG01513	111.686	161.034	87.6866	108.56	104.746	162.905
PARG01514	430.474	552.072	332.093	376.596	503.194	451.941
PARG01515	94.3739	18.9793	148.471	52.6444	22.6347	46.1767
PARG01516	23.3454	11.3767	17.6816	8.64149	4.60455	14.4129
PARG01521	343.415	331.612	367.713	367.208	430.721	394.811
PARG01524	428.125	359.173	314.666	439.17	355.242	412.376
PARG01525	395.767	448.176	277.171	367.989	437.153	570.193
PARG01526	42.2008	205.605	91.6811	44.4593	102.395	292.604
PARG01533	851.957	328.238	2113.39	1429.39	822.291	780.324
PARG01535	2.27232	2.58118	2.0472	2.67985	1.20555	1.22478
PARG01536	4.82144	2.72146	2.94098	4.84766	4.17907	2.08631
PARG01537	77.2513	37.3099	45.9013	3.55596	3.3001	4.97596
PARG01538	51.8541	43.8777	51.7756	3.59245	2.88267	4.74019
PARG01539	21.4821	17.6989	27.6552	3.00127	1.89479	2.53471
PARG01543	25.3269	14.4262	14.2208	16.3432	14.8725	19.7693
PARG01548	150.514	69.4196	387.768	332.717	196.727	143.967
PARG01549	4.47972	1.00995	1.2549	16.0464	12.6305	6.23291
PARG01553	143.887	117.66	123.528	128.739	256.262	178.899
PARG01554	156.176	139.275	133.155	161.213	480.869	354.658
PARG01555	382.943	431.59	372.253	81.1506	86.0947	110.356
PARG01559	49.5282	110.295	14.6116	18.7252	253.577	265.713
PARG01560	3.308	18.1189	2.22889	0.921312	1.60789	1.32469
PARG01562	2.50142	14.7754	1.96951	0.994661	1.64385	0.513668
PARG01564	56.5925	352.442	41.6699	20.6021	36.5113	20.4259
PARG01565	91.1769	491.693	44.4408	24.5238	51.4691	26.7206
PARG01571	0	1.50373	3.11175	0.531425	0.149429	1.71598
PARG01573	0	0.88412	0.691252	0.624213	0.383937	0.526042
PARG01575	511.025	244.004	301.698	384.576	919.532	362.68
PARG01576	9.97956	2.59865	6.46951	6.50484	62.2326	114.712
PARG01578	987.582	827.335	617.607	921.502	942.871	1034.45
PARG01581	31.9828	45.1418	25.6033	17.6935	7.91492	135.9
PARG01583	39.6961	44.9697	34.2597	52.8707	50.0695	55.0168
PARG01584	253.551	215.79	169.788	224.603	244.346	212.852
PARG01590	446.015	304.864	597.496	438.889	267.547	146.842
PARG01591	74.0059	67.8731	66.6761	83.3915	90.0933	103.656
PARG01594	107.167	222.242	129.582	103.394	115.066	219.866
PARG01595	34.4852	29.9857	43.7816	45.7711	33.3604	25.4043
PARG01596	2.55935	2.90722	1.15289	8.47606	0.834429	0.624164
PARG01597	333.264	262.017	298.024	259.476	230.06	193.698
PARG01598	39.2159	32.1503	21.2927	33.8618	34.2692	21.1997
PARG01599	5.21011	4.97456	1.1569	4.08598	3.78486	8.93306
PARG01600	10.9276	13.3572	5.65041	16.8945	13.7768	11.4449
PARG01601	6.96893	5.6982	32.5298	3.93506	6.88164	11.4788
PARG01602	459.072	354.219	360.062	447.63	446.099	479.451
PARG01605	3.27827	4.2908	1.53045	4.33217	8.49425	7.65067
PARG01606	19.3943	29.1318	22.3106	12.9456	16.5635	74.0465
PARG01611	10.7136	16.9171	9.12243	4.32548	5.29621	6.44088
PARG01613	0	0	0	2.61964	3.00439	0
PARG01614	0	0	3.26467	2.37911	1.68756	6.36881
PARG01615	654.765	613.85	667.278	579.317	556.874	496.125
PARG01616	18.3997	19.4722	27.1329	17.4445	19.8208	12.8662
PARG01617	151.781	136.536	312.15	173.908	180.802	164.935
PARG01618	68.5612	50.0705	293.426	55.4226	64.9403	120.122
PARG01635	0	0	2.46485	0	2.28176	23.285
PARG01636	2195.59	1974.48	1766.74	2131.15	1653.62	1213.12
PARG01638	1573.39	1557.75	1372.41	1499.89	1789.35	1856.45
PARG01639	301.128	235.46	312.042	169.278	149.921	73.5641
PARG01641	80.8285	72.3389	99.5295	81.2087	71.5209	50.2498
PARG01642	89.676	121.156	104.543	119.397	131.957	94.2818
PARG01643	1574.82	218.4	709.701	1215.14	4378.95	4114.52
PARG01644	288.335	345.379	226.393	325.265	353.223	402.247
PARG01647	348.859	435.289	374.775	456.942	568.168	451.153
PARG01652	113.836	120.374	62.305	88.8115	69.865	93.5917
PARG01655	446.425	375.318	320.575	465.42	757.992	926.909
PARG01659	195.852	173.677	141.784	187.006	284.948	328.68
PARG01663	7.00066	3.49747	7.24656	0.760137	0.322437	2.66443
PARG01666	37.0735	45.3693	63.0097	45.9205	53.9322	16.4885
PARG01667	44.9277	63.432	61.5447	23.9078	43.9683	20.3273
PARG01669	190.953	161.105	342.942	131.425	167.833	135.796
PARG01670	274.49	176.214	252.602	233.687	200.446	185.645
PARG01675	6.57131	11.2774	14.1908	7.67761	6.60044	5.06032
PARG01676	303.467	246.771	828.294	338.843	345.303	623.829
PARG01677	75.925	65.939	98.6583	112.617	157.105	147.333
PARG01681	581.265	490.802	390.989	547.266	581.023	550.961
PARG01683	49.5719	49.9849	57.2101	38.9672	30.302	27.9457
PARG01687	236.831	260.601	267.295	321.814	202.257	258.434
PARG01689	196.381	247.881	372.527	230.188	303.209	207.39
PARG01691	2.30099	2.65143	0.946476	2.13159	2.93223	4.39538
PARG01694	21.1766	43.1508	29.196	27.8278	27.8612	14.1005
PARG01695	17.4054	23.5759	31.8689	22.642	22.5679	17.2502
PARG01699	16.7297	8.3171	46.8367	11.4064	9.09032	25.6912
PARG01700	92.615	117.776	161.012	147.145	171.325	188.492
PARG01701	0	1.30812	5.13944	2.83905	5.4728	2.47171
PARG01702	12.184	7.78283	16.8697	12.5334	15.7049	6.05197
PARG01703	104.576	80.3114	139.795	140.343	77.1435	95.5252
PARG01704	65.4948	48.0757	53.3407	66.5403	55.0683	39.7262
PARG01715	381.51	256.4	155.575	382.143	326.755	179.041
PARG01716	641.377	328.858	551.972	739.477	433.886	508.37
PARG01728	33.1082	4.80271	0.587519	12.4504	13.3429	0.557666
PARG01729	108.636	75.2442	87.9563	118.956	121.956	101.07
PARG01733	104.394	1589.71	123.022	40.8965	123.97	80.3756
PARG01735	391.136	312.913	281.831	362.805	280.411	237.816
PARG01741	148.432	20.0688	319.413	157.267	80.5713	25.2741
PARG01742	28.1299	16.0249	95.4463	219.007	146.059	153.524
PARG01745	0	2.13326	1.27916	1.76833	10.1789	30.8294
PARG01747	413.969	578.844	664.122	501.094	384.225	306.932
PARG01748	8.02233	1.09695	9.42783	2.13275	1.13078	9.67865
PARG01749	328.423	450.42	285.471	264.633	258.36	253.526
PARG01750	9.11769	2.07683	4.0502	25.4801	4.11953	0.143457
PARG01753	615.902	496.221	403.612	643.05	604.343	883.841
PARG01756	0.931564	2.11637	0.31028	2.15631	1.59642	2.87254
PARG01757	1026.99	596.225	2382.78	810.788	773.538	2716.81
PARG01758	128.859	84.0981	124.33	145.461	70.0221	111.709
PARG01759	301.135	168.889	232.826	279.935	139.293	242.592
PARG01760	186.83	248.56	317.82	212.354	178.654	149.927
PARG01762	460.401	512.695	376.029	475.769	384.096	528.58
PARG01763	4.66932	107.641	33.6375	6.62981	18.8148	15.8369
PARG01764	241.915	91.7597	255.398	211.336	101.74	42.3614
PARG01775	0	0	0	0.6038	1.54961	1.23602
PARG01776	0	0	23.1716	0	0	1.45511
PARG01777	150.499	221.348	92.6092	122.763	111.771	100.187
PARG01778	2.53269	3.89814	1.52118	13.4386	3.6301	4.2964
PARG01780	0.996469	2.26382	2.12739	0	0	0.972058
PARG01781	1.16893	5.31126	2.22115	0.447044	0	2.40041
PARG01782	240.411	142.147	201.056	180.794	184.146	111.915
PARG01783	59.6688	157.621	117.893	89.0335	134.992	317.89
PARG01784	153.506	126.026	168.355	112.33	82.9579	77.496
PARG01786	371.804	957.76	516.68	520.201	388.002	1494.24
PARG01787	1.0259	0	0	2.4259	1.25683	5.7739
PARG01789	273.907	107.822	77.0872	171.849	135.218	447.074
PARG01790	0	0	0.817351	0.728396	0.893624	3.73803
PARG01791	3090.77	3239.1	3589.78	2421.76	1454.85	1658.58
PARG01792	108.041	144.075	169.823	130.726	167.551	104.509
PARG01793	0.232965	0.402669	1.12702	0.439912	0.560961	1.41285
PARG01794	71.5524	138.267	40.9078	105.084	39.8644	116.425
PARG01796	13.4634	8.64416	5.06253	38.4758	29.801	6.79775
PARG01801	1.38147	0.75068	0.460131	1.62098	1.60339	1.48922
PARG01802	2.73189	0	1.68558	0.522388	0.708458	6.96053
PARG01803	2.63055	6.2358	4.99021	9.88269	55.6564	61.7541
PARG01808	1.82297	3.37616	3.32952	3.30793	15.2941	17.4726
PARG01809	3.75296	7.51964	5.41863	6.15506	25.8549	31.7359
PARG01811	7.65503	11.8816	10.2026	10.2929	44.8383	53.3312
PARG01812	2.83131	6.67676	4.81754	6.63861	26.6481	35.1046
PARG01819	0.949759	1.12552	1.48834	0.399316	3.97982	5.86358
PARG01820	424.274	324.42	156.669	286.281	1071.94	1538
PARG01821	443.034	349.275	328.267	388.989	445.817	363.569
PARG01822	13.1033	9.92284	14.3172	6.32002	84.1205	256.973
PARG01823	2012.06	431.425	475.179	1306.74	7619.46	11094.4
PARG01824	1154.14	80.5597	207.826	511.346	1768.43	2932.89
PARG01825	3135.2	1238.73	400.773	1212.79	9944.53	9504.12
PARG01826	245.119	208.492	108.21	225.221	862.661	649.45
PARG01827	14.757	24.1759	22.4231	8.4321	121.355	241.016
PARG01828	0	0.286984	1.93585	0	0	0.971375
PARG01829	0	2.11862	0.396976	1.81613	2.20941	3.08989
PARG01830	49.3033	35.753	37.9788	44.7119	38.9498	29.2195
PARG01832	1443.61	864.667	893.418	1390.08	959.498	523.449
PARG01833	300.905	231.69	221.419	259.184	237.912	189.206
PARG01834	150.078	115.804	170.914	123.935	116.875	96.2962
PARG01835	3676.99	3137.92	1950.53	2171.63	3239.09	2884.82
PARG01836	300.571	176.3	145.665	255.586	293.187	295.014
PARG01837	343.374	302.619	370.417	434.056	405.938	228.529
PARG01838	388.357	526.019	465.379	380.329	449.689	423.302
PARG01839	173.26	163.907	170.444	172.715	178.767	196.265
PARG01840	1.96542	2.48748	3.61384	2.02377	3.21013	4.06524
PARG01841	91.1769	288.342	61.2384	85.7746	97.2724	95.1167
PARG01842	224.89	111.481	180.95	207.79	144.917	97.6623
PARG01843	75.4107	67.2039	159.623	40.9944	51.1107	152.531
PARG01844	87.4434	87.4581	105.604	110.6	111.818	96.6797
PARG01845	271.699	384.444	265.506	251.16	244.681	252.68
PARG01846	31.2606	61.5838	49.1077	39.3521	42.7359	44.314
PARG01847	21.9107	45.2036	2.14574	65.5478	28.2018	4.71302
PARG01849	108.411	108.673	81.377	80.5417	108.326	243.723
PARG01850	116.641	135.652	122.083	105.215	130.528	322.558
PARG01851	0	0.619639	1.51602	0	0	5.70408
PARG01852	2.60041	0.770407	11.9199	4.05352	0.377621	10.6133
PARG01854	371.106	349.279	332.569	402.473	373.183	479.351
PARG01855	23.1674	19.9349	29.2107	20.9916	21.5948	16.5709
PARG01856	111.972	225.886	217.053	91.2711	125.88	137.83
PARG01857	27.2678	22.1819	24.6285	18.7968	11.0829	53.3097
PARG01858	59.4003	61.8577	8.28154	50.3258	48.4602	214.504
PARG01859	510.869	1879.77	171.356	180.189	394.742	338.265
PARG01860	12.1569	24.4983	0	6.55783	9.35434	7.62193
PARG01862	1259.53	1397.41	860.994	1100.35	1092.14	1368.27
PARG01863	12.0814	22.177	14.76	4.38949	7.40964	9.29099
PARG01864	308.014	231.937	424.197	301.093	230.188	262.431
PARG01865	233.888	141.821	220.025	163.667	76.0834	153.811
PARG01869	4.00777	6.79595	6.64515	6.28613	6.99816	2.74333
PARG01870	770.501	518.369	416.804	856.009	553.042	647.454
PARG01871	143.862	158.477	185.172	143.54	136	111.095
PARG01874	3217.93	5348.37	5706.88	1552.56	1740.86	2490.98
PARG01875	701.122	565.634	437.962	708.722	670.88	411.554
PARG01876	0.651845	3.68621	0.695822	0.656492	0.68582	2.00785
PARG01877	336.378	309.713	324.413	344.428	356.699	277.11
PARG01878	37.6126	14.098	51.4016	27.0074	23.8302	78.0526
PARG01879	0.748118	0	0.674	0	0	7.39805
PARG01880	463.158	967.405	616.32	446.907	836.868	665.942
PARG01881	238.033	347.682	556.04	161.882	322.558	482.998
PARG01882	522.297	717.748	322.767	431.957	559.285	826.55
PARG01883	11.1626	13.2309	14.6363	14.5441	12.3823	14.1006
PARG01884	4595.07	3262.95	2440.67	4105.2	3026.15	2762.31
PARG01885	25.1522	53.8987	35.0587	31.1632	42.8359	31.0534
PARG01886	234.218	484.674	263.954	232.466	364.762	301.993
PARG01888	7412.12	8027.34	5473.36	8284.72	4343.52	6539
PARG01889	171.819	113.527	128.102	181.42	151.898	90.0854
PARG01892	332.979	314.489	510.877	325.004	432.852	377.257
PARG01893	118.147	153.177	130.098	118.751	103.068	112.888
PARG01894	46.4664	51.9826	94.376	50.5837	40.2078	240.165
PARG01895	30.3923	17.0483	12.1616	16.7095	13.4475	50.0996
PARG01896	496.44	261.292	407.857	248.968	203.52	370.35
PARG01897	54.3923	24.3132	20.0534	28.3189	62.3155	235.006
PARG01900	191.381	142.815	100.464	131.446	368.845	389.397
PARG01901	214.041	150.542	61.2819	243.372	101.065	170.702
PARG01903	50.3502	70.6325	70.8814	47.4348	37.653	39.6153
PARG01904	29.053	62.9812	59.5048	37.7902	34.0354	38.3013
PARG01905	351.317	220.027	284.968	475.099	353.352	372.488
PARG01906	53.9549	1.95629	7.63727	51.5514	19.1675	3.7366
PARG01907	11.7377	5.93168	14.7018	13.3892	7.49129	22.0508
PARG01909	17.492	8.89829	9.21666	5.45329	24.93	12.4042
PARG01910	8.4288	14.3776	9.13018	10.2169	15.5149	21.4615
PARG01911	103.95	128.259	76.7326	94.3879	83.8167	274.793
PARG01912	16.7836	15.3518	57.3071	8.1119	17.6658	88.8176
PARG01914	170.279	183.813	155.215	259.776	711.16	1092.45
PARG01915	225.269	412.829	191.785	228.864	338.476	238.396
PARG01916	900.657	380.12	325.387	676.572	688.487	248.119
PARG01917	1.28645	0	9.52486	0.491985	0	13.1555
PARG01918	146.875	276.438	296.101	150.788	155.813	174.858
PARG01919	141.359	134.644	248.576	167.62	205.372	146.856
PARG01920	2068.92	1655.39	2023.32	1682.36	1461.85	2057.8
PARG01921	102.768	117.297	183.942	117.729	116.644	118.239
PARG01922	2240.8	4059.06	1592.85	1459.32	4004.56	6838.94
PARG01923	185.698	296.843	213.656	206.477	270.646	148.18
PARG01924	158.61	181.434	149.794	162.527	150.867	121.907
PARG01925	219.092	76.0104	202.419	216.128	87.2978	55.1362
PARG01926	108.412	165.867	3.54596	353.777	129.508	3.81989
PARG01927	151.244	210.427	6.00025	446.894	158.748	6.25794
PARG01928	39.3816	66.124	4.39412	157.993	49.2091	1.75805
PARG01929	30.1567	58.7324	1.25555	104.084	30.2386	2.86077
PARG01930	38.2001	41.7107	53.8811	41.0759	44.1137	23.9954
PARG01932	128.798	167.261	1.31324	411.8	132.232	14.8111
PARG01933	78.5948	31.7133	11.4061	46.2012	52.2966	7.35761
PARG01934	107.126	92.1106	100.09	104.824	108.536	98.6939
PARG01938	350.359	250.627	389.044	372.121	366.144	312.268
PARG01939	176.732	244.554	59.8004	166.106	90.0712	95.3018
PARG01942	27.2274	26.7162	30.6384	23.6386	11.716	25.4293
PARG01943	5.56805	4.21658	17.7753	7.18379	2.63892	7.64111
PARG01948	11.2564	7.86239	25.5945	13.6843	4.9157	10.7344
PARG01950	34.0059	38.4037	32.1286	12.9727	10.4692	15.9195
PARG01951	11.8983	12.0337	7.55872	1.83337	2.25241	1.31634
PARG01952	15.9062	16.8335	7.65529	0	0.789141	0
PARG01953	0.244442	0.688161	0.579256	1.13946	0.598383	0.501962
PARG01954	1.64283	0.595133	3.25018	0.876057	1.93548	5.21698
PARG01955	711.497	1048.54	783.412	968.35	1017.24	728.007
PARG01956	1243.96	1604.93	1227.2	1381.41	1412.58	1187.69
PARG01957	188.288	265.444	279.261	170.852	219.445	290.996
PARG01958	93.7011	140.072	134.028	45.4708	46.9028	48.518
PARG01959	66.0287	10.4539	124.095	27.2587	15.4466	41.8492
PARG01960	438.645	903.712	535.981	346.893	1019.92	1300.94
PARG01961	5.40307	10.8069	10.0011	4.32188	5.2035	8.46881
PARG01962	3.57969	4.44055	19.7976	5.6717	3.60435	12.9468
PARG01963	337.343	479.658	107.333	267.2	185.869	326.127
PARG01965	209.898	281.057	160.973	208.883	276.581	262.907
PARG01966	119.296	59.5472	120.826	126.817	109.278	115.999
PARG01968	5.18695	0.768353	33.9471	1.77726	0.188307	3.26211
PARG01969	101.738	38.3849	23.3131	142.349	59.813	35.1433
PARG01970	123.998	69.2488	41.9207	174.307	62.3586	28.7575
PARG01971	141.359	194.247	142.514	130.613	112.211	91.4358
PARG01972	48.9367	40.5518	47.7028	66.068	23.7569	51.0618
PARG01973	198.338	211.951	132.601	222.181	177.657	172.633
PARG01974	64.336	35.7829	281.978	40.458	26.734	116.551
PARG01976	86.6836	30.0107	74.3056	56.5097	56.7042	144.02
PARG01977	23.857	28.2778	58.1501	36.6399	13.3812	62.9373
PARG01978	39.0758	38.5437	89.3122	62.1959	18.2709	129.914
PARG01979	9.72553	4.32198	17.763	24.7702	28.6319	138.128
PARG01980	155.467	146.932	365.955	225.021	75.0302	344.313
PARG01984	7.6216	8.99205	12.9593	8.5409	10.3065	4.80674
PARG01985	125.779	209.899	126.218	131.248	79.9435	137.857
PARG01987	207.856	219.267	256.657	207.143	236.89	262.595
PARG01988	67.176	53.5038	68.3073	62.9701	46.4081	62.5461
PARG01989	68.4	73.0743	77.4816	74.1802	72.576	72.1571
PARG01990	135.316	51.1828	150.732	70.1978	57.6646	59.2451
PARG01991	77.0032	74.4089	35.0198	89.515	40.9951	17.5039
PARG01993	0	26.3266	1.04675	0.280838	0.757606	2.06192
PARG01995	12.0964	11.6498	9.19401	13.1712	13.5085	13.4801
PARG01996	0	0	0	17.1077	9.05845	13.3832
PARG01997	0	25.9636	1.04675	0.280838	0.757606	1.37387
PARG01998	271.715	220.027	195.698	269.341	224.215	261.313
PARG02000	352.063	249.064	304.429	402.531	428.349	585.947
PARG02002	0	0	0	3.80064	2.08824	2.97805
PARG02003	0	1.06548	0	3.78881	2.52147	4.13347
PARG02005	175.369	515.527	328.902	114.583	75.0326	482.814
PARG02006	71.4576	45.3266	70.7057	64.5698	59.6286	63.4189
PARG02007	5113.11	550.67	1018.49	6480.93	4143.31	2326.11
PARG02008	424.715	559.663	352.695	384.698	603.997	560.572
PARG02009	24.8882	7.75252	30.7852	17.7373	6.18768	7.77733
PARG02010	457.212	725.083	543.054	419.355	552.646	530.613
PARG02011	607.354	506.5	515.076	712.187	563.271	380.583
PARG02012	1625.34	2232.35	2915.02	1617.22	1618.03	2016.76
PARG02014	31.054	43.4152	30.7713	36.3279	41.4317	15.629
PARG02015	1071.25	1127.29	1393.13	1316.27	842.67	680.284
PARG02016	153.677	209.377	206.244	241.908	84.7586	161.669
PARG02018	399.566	291.41	302.568	408.672	314.195	371.054
PARG02019	1.28645	4.06598	30.011	2.00915	2.30404	11.9888
PARG02020	11.3568	2.09038	2.10269	4.07033	0.307258	1.08822
PARG02021	65.4035	36.0246	69.2338	51.8351	34.9586	33.4547
PARG02025	12.2616	20.0724	25.4347	11.5506	20.8644	12.5412
PARG02026	1551.16	4196.91	1093.48	1016.34	1484.4	482.316
PARG02027	305.416	317.863	257.886	355.17	336.063	362.3
PARG02032	10.2409	16.8864	16.0085	14.3543	14.7514	8.00726
PARG02033	193.353	178.6	612.183	397.199	396.206	548.163
PARG02034	145.23	188.062	201.672	161.814	207.301	89.7328
PARG02035	113.898	164.742	126.106	138.014	86.1831	136.458
PARG02036	336.545	129.828	238.244	367.304	217.467	85.1781
PARG02038	13.2455	27.949	18.3475	17.7202	17.9388	14.3052
PARG02039	82.2648	137.683	120.51	108.106	131.789	178.803
PARG02040	810.431	974.234	335.467	911.106	594.417	247.648
PARG02041	35.2943	47.9079	165.462	20.555	20.4372	252.582
PARG02042	71.305	92.3119	273.488	183.447	116.303	290.607
PARG02044	114.612	129.089	107.29	102.539	146.69	273.216
PARG02045	0.635656	2.3701	3.7849	1.21619	1.75787	51.7438
PARG02046	664.847	749.847	634.908	731.351	606.384	746.276
PARG02047	108.966	133.987	165.204	83.4895	110.893	89.2129
PARG02048	184.409	110.334	77.9297	37.4014	899.783	3324.09
PARG02049	8.68351	4.22733	4.3011	0.988567	26.2104	82.5907
PARG02050	125.633	99.1348	105.45	112.913	138.944	86.6215
PARG02052	82.1464	114.845	84.8061	101.389	135.262	78.7546
PARG02053	672.556	1005.26	775.602	765.532	1133.3	693.186
PARG02054	0	2.55719	1.04809	1.8611	1.50997	0.283711
PARG02055	237.322	780.127	397.492	262.804	420.785	553.084
PARG02056	205.369	169.646	85.6998	148.376	98.6646	124.968
PARG02057	179.849	634.664	132.308	137.844	327.962	262.284
PARG02058	11.3616	9.08994	6.67508	2.77977	3.48298	3.55789
PARG02059	3553.2	10129.8	2455.24	1692.08	5443.94	5264.89
PARG02060	192.333	30.0195	98.9443	131.407	172.259	27.0661
PARG02061	522.562	344.621	401.043	508.975	555.329	352.992
PARG02062	1380.56	1298.64	1950.94	1013.35	957.833	1146.94
PARG02063	250.867	240.562	212.181	243.599	196.933	191.359
PARG02064	196.236	138.812	123.272	230.525	210.157	137.607
PARG02065	421.078	403.824	362.214	391.738	377.366	352.141
PARG02066	10.5968	8.19935	22.5136	12.0602	5.28313	14.2478
PARG02067	125.19	175.556	144.919	106.389	165.835	254.592
PARG02068	539.668	475.262	473.486	427.764	474.27	388.508
PARG02069	1849.38	2067.13	3290.5	1995.07	1902.14	1401.97
PARG02070	9.1063	18.7982	10.6853	17.9835	15.7607	43.8619
PARG02071	191.894	167.588	414.348	173.461	158.317	106.03
PARG02072	321.596	303.172	190.982	310.973	279.942	245.66
PARG02073	224.178	295.254	219.94	176.386	234.71	220.841
PARG02074	0	0	5.87718	0	0	2.81953
PARG02075	195.732	196.211	208.908	194.978	189.28	304.105
PARG02076	219.119	94.3941	139.779	216.717	104.513	129.036
PARG02077	848.002	1705.75	1487.59	743.388	1303.6	1218.82
PARG02078	295.226	1005.32	416.067	200.256	1012.32	1094.34
PARG02079	2.82719	24.1554	24.0354	3.33423	26.2768	68.5972
PARG02081	39.3556	14.8105	64.2595	36.6261	15.3759	19.3002
PARG02082	26.3104	5.91713	44.0882	26.5	20.2526	8.88262
PARG02083	89.2238	56.4746	100.074	179.671	724.113	150.857
PARG02084	538.462	201.72	790.08	403.413	379.491	172.427
PARG02085	155.609	158.834	139.626	106.747	118.704	100.549
PARG02086	226.878	72.0583	151.119	158.942	122.218	57.9828
PARG02087	66.6095	30.4454	15.9025	54.8871	33.5409	38.2368
PARG02088	658.025	814.114	715.602	715.996	887.386	939.144
PARG02089	43.5472	82.6968	209.293	56.9754	58.973	101.165
PARG02090	275.879	187.045	562.524	206.522	210.687	1276.05
PARG02091	92.8653	49.1153	177.093	54.6509	70.7083	657.598
PARG02092	405.939	756.288	452.773	435.051	205.156	549.635
PARG02093	2.03038	0.852412	44.8799	4.46776	1.7865	12.1717
PARG02094	106.52	125.23	62.881	60.1806	386.789	529.519
PARG02095	143.156	224.234	465.982	91.5973	160.321	1562.95
PARG02096	151.613	75.0666	57.1717	151.542	43.9371	319.773
PARG02097	268.732	41.8457	257.369	92.6124	19.0964	305.264
PARG02098	10.1308	15.1749	33.2183	16.4469	25.632	15.5847
PARG02099	231.926	191.806	441.612	241.978	275.064	189.984
PARG02100	1573.95	1244.79	1195.51	1637.66	1571.09	2130.32
PARG02101	6009.65	4851	3104.89	5267.04	4753.99	6194.71
PARG02102	297.095	842.155	226.903	243.36	208.203	421.728
PARG02103	13.072	22.0804	5.58154	11.2339	2.46405	12.0298
PARG02104	238.432	286.522	263.023	287.676	260.227	200.637
PARG02105	309.475	129.205	148.223	318.889	399.053	154.459
PARG02106	69.1939	28.8277	49.3664	58.6833	50.9643	54.0684
PARG02107	47.7624	37.6131	59.2421	22.3562	29.5836	55.4265
PARG02108	1040.17	1163.91	1271.73	1729.01	1433.72	580.147
PARG02109	131.708	561.974	95.1858	106.446	264.092	309.854
PARG02110	160.719	604.864	82.3324	119.505	315.65	421.693
PARG02112	242.124	591.369	453.776	226.639	117.217	344.05
PARG02113	326.106	342.865	273.956	333.905	394.138	400.783
PARG02114	1.25761	0.703975	12.6944	1.62004	0.769706	3.90497
PARG02115	2559.93	1239.25	2818.24	1629.27	3645.57	3166.49
PARG02116	319.781	387.199	260.56	178.616	186.727	710.788
PARG02117	20.5247	29.1624	27.5387	17.2763	24.0299	103.911
PARG02119	206.181	235.186	202.103	207.269	216.074	257.987
PARG02120	68.3221	107.772	95.8712	87.5922	85.4755	76.3794
PARG02121	184.101	186.018	235.237	170.725	187.134	164.097
PARG02122	334.554	739.148	507.649	384.277	359.751	604.696
PARG02123	75.9345	51.9591	152.933	68.2066	51.1407	35.5314
PARG02124	48.6277	12.2073	34.1902	53.1965	48.3505	26.8295
PARG02125	262.134	165.999	139.617	189.927	37.2623	177.235
PARG02126	25.5088	28.4988	46.9534	34.9319	28.019	22.3003
PARG02127	561.386	713.999	375.316	600.003	555.569	632.497
PARG02129	14.0458	12.4383	17.0469	15.3921	22.3354	52.4525
PARG02130	1.04202	1.38946	0.312928	13.7474	3.84306	3.57322
PARG02131	9.92401	2.94013	0	49.8389	10.1286	4.29348
PARG02132	5.34904	6.8927	4.31463	10.2431	9.511	41.0517
PARG02133	39.0061	30.5149	23.9603	86.2459	104.349	234.634
PARG02134	16.6438	113.659	89.5672	17.7554	45.5838	435.625
PARG02135	6.80787	25.9376	7.1052	9.05913	23.1231	40.2066
PARG02136	1553.51	1021.35	860.3	1443.69	1524.4	1302.71
PARG02137	35.4486	20.6536	25.4354	46.16	36.2646	47.653
PARG02138	7.38915	9.48883	1.90203	13.0771	13.1165	16.1127
PARG02139	13.5077	9.92327	19.3359	21.7003	17.9341	20.5821
PARG02141	74.2884	49.1518	74.0724	77.0806	74.8664	108.584
PARG02142	7.6579	7.65845	8.62401	7.4828	2.57547	0.933788
PARG02143	11.6791	7.64293	13.5903	14.0001	9.44305	14.8859
PARG02144	68.1903	64.4013	42.6286	72.7545	21.4139	35.8147
PARG02145	116.592	122.666	84.9297	83.5171	67.8167	108.031
PARG02146	0.907233	3.62919	14.9105	0	6.13952	41.2097
PARG02147	295.195	311.353	219.252	267.212	244.18	320.168
PARG02148	280.381	178.674	237.665	254.654	263.823	270.192
PARG02149	2.06633	5.17018	5.03201	4.54574	6.31505	8.93056
PARG02150	3.37692	5.77046	3.78361	6.43552	19.04	18.2073
PARG02151	774.296	305.547	309.695	855.95	540.2	1141.12
PARG02152	1474.79	425.847	370.071	1600.96	806.798	2071.43
PARG02153	296.416	312.395	261.058	230.118	311.585	286.681
PARG02154	461.795	330.058	318.495	420.076	232.039	97.8324
PARG02155	439.239	92.9298	435.914	308.176	67.9718	268.932
PARG02156	2.92938	0	86.9161	3.45475	0.742785	15.0387
PARG02157	20.6501	26.8455	72.4931	21.7128	12.9213	53.5676
PARG02158	5.83532	1.05696	5.18292	0.743881	0.675504	1.99714
PARG02159	1154.95	948.438	601.639	915.168	684.729	275.826
PARG02160	400.511	306.844	253.868	235.49	1275.3	1142.02
PARG02161	51.9325	55.6684	38.6996	40.243	42.123	33.5769
PARG02162	390.68	383.729	343.018	599.533	540.5	574.556
PARG02163	243.374	342.085	243.873	277.916	287.995	303.161
PARG02164	146.834	162.199	163.711	204.468	203.595	169.114
PARG02165	536.637	1051.97	780.128	658.454	615.313	590.553
PARG02166	1.39334	2.39121	4.41449	0.970149	0.995658	4.18589
PARG02167	2040.07	4824.96	3650.73	3187.96	2451.83	9341.41
PARG02168	210.047	518.852	304.403	202.89	265.712	378.785
PARG02169	759.71	2101.82	646.56	576.975	1057.55	1064.94
PARG02170	240.547	417.238	255.717	234.65	298.326	230.427
PARG02171	208.13	474.368	328.98	122.03	193.246	296.637
PARG02172	11.2721	13.3066	26.0248	8.6444	17.2745	13.1049
PARG02173	313.34	122.117	256.011	316.381	384.963	140.279
PARG02174	130.237	71.8745	73.7256	197.432	190.578	133.759
PARG02175	45.5884	25.6263	37.7481	81.4169	84.7508	43.2366
PARG02176	1582.46	1760.43	1780.39	1523.72	1338.4	1618.77
PARG02177	183.471	267.087	168.152	207.125	162.182	248.131
PARG02178	136.527	109.205	150.39	255.356	239.895	143.539
PARG02179	488.37	532.585	435.663	1035.04	640.814	427.826
PARG02180	97.5651	75.1645	93.8831	120.824	81.8379	39.6534
PARG02181	73.1461	65.2283	107.364	67.9612	60.5074	58.0168
PARG02182	187.212	229.275	248.876	193.803	176.142	221.897
PARG02183	777.741	3237.12	554.353	712.879	975.372	5207.98
PARG02184	302.837	252.213	291.958	308.234	285.883	422.464
PARG02185	180.454	116.848	197.265	182.457	126.805	185.979
PARG02186	1395.61	1151.86	1357.57	1443.6	1296.61	1096.71
PARG02187	478.909	593.217	504.047	453.215	538.11	545.214
PARG02188	758.019	1160.58	1166.91	720.354	807.084	857.997
PARG02189	114.137	105.186	102.677	124.106	109.359	106.406
PARG02190	77.2471	74.3025	75.3539	124.984	129.924	105.111
PARG02191	192.485	96.7177	138.873	176.847	110.311	53.6907
PARG02192	18.7607	6.26414	31.1161	16.3073	6.43816	9.42472
PARG02193	63.6911	35.3515	84.7801	35.6215	18.2269	80.2567
PARG02194	31.608	10.1479	23.6442	12.3752	9.35923	10.0641
PARG02195	49.9175	36.4673	92.4416	202.953	102.558	678.755
PARG02196	1321.41	2424.75	2758.88	1300.55	1641.7	1643.7
PARG02197	0	0	0	0	0	33.8197
PARG02198	58.4163	75.9874	80.6956	44.7339	50.7185	27.4582
PARG02199	167.257	159.773	215.935	211.242	207.353	212.409
PARG02200	184.087	121.121	69.9213	175.019	142.499	134.389
PARG02201	86.6928	228.397	132.889	57.1446	80.005	373.789
PARG02202	247.376	577.247	289.852	212.665	405.098	778.184
PARG02203	69.0961	221.664	124.393	101.269	129.201	536.261
PARG02204	246.317	572.562	297.288	275.993	524.897	958.177
PARG02208	28.6045	20.4835	31.2918	46.9396	39.5064	49.1364
PARG02209	58.5813	56.5589	36.2946	56.6939	17.8459	31.6943
PARG02210	22.1834	38.5726	43.9289	17.8789	28.529	32.7379
PARG02211	523.082	342.518	336.237	388.687	902.577	570.876
PARG02212	961.237	967.905	759.813	851.336	900.747	749.119
PARG02213	1509.31	2342.53	1879.06	1393.74	1026.35	718.577
PARG02214	886.007	1135.18	1268.93	598.45	613.229	718.679
PARG02215	25.3269	11.3418	18.0882	7.24515	14.7694	36.4677
PARG02216	502.273	603.33	605.19	610.719	681.198	714.758
PARG02217	0.426808	0	0.426476	0.650362	0.495372	1.75573
PARG02218	2068.7	1239.91	4352.59	2772.02	1955.88	2210.14
PARG02220	345.315	85.091	81.8613	178.861	304.684	130.981
PARG02221	29.4244	19.0261	32.3798	27.9275	29.4588	6.24256
PARG02222	162.618	115.605	108.267	168.228	251.856	258.399
PARG02223	7941.07	8725.07	5359.67	6839.94	8296.08	7131.62
PARG02224	141.7	115.453	121.151	148.23	126.567	135.346
PARG02225	224.719	189.405	221.052	201.615	236.317	160.895
PARG02226	3157.37	3740.89	3861.36	3371.08	3102.66	2142.75
PARG02227	201.753	277.741	47.8209	86.9745	39.3794	184.595
PARG02228	2777.74	1888.56	837.241	1462.89	3480.14	4487.51
PARG02229	104.11	614.049	163.557	120.672	194.903	154.337
PARG02230	541.436	647.662	665.212	511.086	444.232	683.572
PARG02231	15.0395	22.5772	66.9624	12.4633	13.947	30.8013
PARG02232	165.514	88.2088	106.192	82.1005	368.631	365.195
PARG02233	212.803	161.587	248.032	198.768	172.273	406.119
PARG02234	553.858	532.324	1237.93	522.486	595.724	642.579
PARG02236	111.869	50.0006	46.5693	135.076	105.172	141.387
PARG02237	279.974	332.184	249.463	263.372	299.76	246.316
PARG02238	9.88367	2.29398	52.2288	1.54362	0.774979	23.9224
PARG02239	267.709	330.618	503.821	230.994	269.849	332.564
PARG02240	320.135	108.061	142.722	245.046	498.897	459.845
PARG02241	0	0.810372	1.01809	0.191672	0.703586	21.6561
PARG02242	811.655	868.657	756.197	673.417	644.34	637.889
PARG02243	216.099	369.659	224.025	237.183	332.684	450.75
PARG02244	2718.18	5904.56	1986.82	1932.41	2120.65	1716.31
PARG02245	1.70185	15.3808	4.56075	1.30448	5.8025	19.7423
PARG02248	6.06162	3.82529	6.20027	2.89405	3.99397	8.30729
PARG02249	31.7137	175.424	18.7835	27.4915	67.2677	56.9584
PARG02250	130.6	122.285	54.6179	170.903	45.8041	77.5972
PARG02251	1.8751	0.709989	20.6406	0.262789	0.624626	28.4832
PARG02252	129.028	109.837	146.256	116.275	74.0121	88.5481
PARG02253	2726.81	3577.42	2136.42	2604.09	2287.08	2268.55
PARG02254	605.478	495.939	836.372	648.182	636.324	426.648
PARG02255	5.11571	7.32664	28.5426	7.14044	1.83474	14.076
PARG02256	7.31686	11.1518	11.9992	11.6131	6.22263	5.14732
PARG02257	193.424	215.485	166.435	174.904	192.808	114.418
PARG02258	262.561	250.82	172.487	268.443	209.985	135.686
PARG02259	234.572	563.787	493.57	268.743	338.74	295.273
PARG02260	324.681	218.359	201.966	326.555	237.563	124.277
PARG02261	68.9939	120.633	80.6275	61.3554	37.0297	101.19
PARG02262	6.0382	3.51846	28.7166	35.956	8.09902	24.3737
PARG02263	7.44301	3.33454	8.12222	5.03296	7.2439	16.1299
PARG02264	1756.65	1964.39	1197.71	1571.72	1884.9	1875.3
PARG02267	424.462	519.068	387.209	322.737	346.062	335.443
PARG02268	82.4105	99.1385	148.333	104.918	109.588	84.5716
PARG02269	190.197	91.1543	189.701	192.55	97.9912	111.247
PARG02270	67.383	50.4087	104.327	49.6217	38.212	34.5862
PARG02271	223.14	193.431	148.047	252.504	223.838	186.881
PARG02272	40.5616	44.5716	53.5512	45.3069	39.495	22.5928
PARG02273	31.6277	31.2072	70.376	46.9397	41.2311	31.5621
PARG02274	256.663	231.37	208.558	278.33	296.272	470.073
PARG02275	398.932	399.623	409.726	350.037	395.319	579.717
PARG02276	183.785	182.501	189.873	224.543	221.888	129.808
PARG02277	0.42806	0.253638	0.285152	0.507386	0.670078	6.84041
PARG02278	57.2893	68.0817	6.62205	69.933	508.143	129.191
PARG02279	347.888	242.265	295.492	345.127	471.356	385.738
PARG02280	276.101	396.759	135.375	255.489	324.646	241.874
PARG02281	1.41359	1.60573	1.4125	5.00979	1.91271	2.14089
PARG02282	0	1.00046	2.08356	2.77542	1.00499	1.73363
PARG02283	0	2.80392	3.86818	3.90202	2.93754	3.7425
PARG02284	2861.16	3604.36	5439.02	3098.55	3069.96	2117.08
PARG02285	223.956	155.28	115.277	157.059	458.442	445.125
PARG02286	219.81	60.9979	263.388	141.982	123.072	260.189
PARG02287	330.22	558.482	167.675	315.606	373.2	677.488
PARG02288	86.0528	128.07	114.255	78.4331	76.5494	70.2818
PARG02289	152.617	139.982	106.004	90.3706	84.0915	58.5261
PARG02290	71.4794	75.2241	86.1921	76.6976	72.1725	122.547
PARG02291	51.7518	47.4954	69.2395	49.7807	46.7198	56.7091
PARG02292	66.592	99.7364	51.6276	35.8583	29.8781	27.8124
PARG02293	30.5982	27.0281	40.2335	23.8412	21.4527	37.1667
PARG02294	55.3912	56.6704	68.6669	55.7744	54.3836	84.4714
PARG02295	49.4442	66.2682	41.6974	27.924	22.7736	22.7363
PARG02296	0	0	1.05312	1.86307	3.62789	4.17464
PARG02297	69.7983	51.4099	47.2148	34.7918	40.5204	28.9792
PARG02298	30.9449	22.3436	31.1136	22.9995	32.6136	26.6247
PARG02299	13.2566	17.3505	17.2733	14.0804	13.3459	39.8006
PARG02300	2.60738	1.48089	7.94053	1.78679	1.45117	5.32949
PARG02301	7.36783	6.02672	8.77506	7.94154	7.02753	13.7374
PARG02303	66.1925	20.2557	74.2725	92.0441	123.943	58.7906
PARG02304	484.23	697.604	561.331	477.599	519.812	381.202
PARG02306	1650.09	650.146	705.38	2161.7	1349.64	2446.26
PARG02307	609.475	355.546	274.328	713.006	577.705	436.801
PARG02308	333.958	214.194	152.538	379.105	274.497	437.006
PARG02310	39.5258	26.0856	15.4874	37.6559	61.9731	14.4811
PARG02311	34.0054	30.7348	18.5489	0	0	0
PARG02312	79.417	88.7423	121.49	102.398	84.7477	126.581
PARG02313	2.32668	2.64293	1.82304	0	0	0
PARG02314	1.0753	1.64623	11.1066	3.2834	2.60232	4.94907
PARG02315	106.423	20.3763	81.8591	107.744	40.7672	21.4267
PARG02316	8.37395	1.71975	0.837461	2.59003	2.05699	2.50602
PARG02317	14.4386	19.9801	41.8815	13.9024	23.9802	22.518
PARG02318	82.2318	87.7063	78.1603	61.7396	73.3034	79.2144
PARG02319	99.7976	108.196	97.021	75.7041	91.7381	96.8614
PARG02320	136.883	107.702	121.813	102.274	70.6392	62.9911
PARG02321	18.5602	26.2168	24.2942	23.1944	15.8742	18.3532
PARG02322	394.689	395.259	439.672	444.63	398.012	303.598
PARG02323	23.3868	13.3147	21.0164	42.802	41.2718	22.5907
PARG02324	109.904	290.882	75.1635	122.187	261.157	251.785
PARG02325	15.6863	9.9747	9.21813	15.3394	13.4792	12.9549
PARG02326	6.28806	8.2817	13.4246	15.516	8.91197	14.9711
PARG02327	0	1.18087	9.83715	2.33847	1.81048	1.07419
PARG02328	22.5178	20.9713	62.929	23.5983	20.2277	13.9628
PARG02329	397.517	547.781	322.231	486.279	339.492	329.316
PARG02330	432.286	467.632	906.32	459.588	635.786	730.99
PARG02331	212.945	321.875	277.706	252.339	274.497	377.214
PARG02332	93.9417	111.386	86.3961	96.4111	98.4742	88.81
PARG02333	190.889	81.824	57.1099	205.841	88.9297	49.7105
PARG02334	223.489	505.549	102.699	258.735	211.575	131.114
PARG02335	11.0225	17.7735	7.31399	10.7647	9.23896	1.54908
PARG02336	422.128	596.111	218.056	466.857	554.397	255.08
PARG02337	0	6.38184	7.89369	1.84189	12.1465	23.4465
PARG02338	499.7	551.873	505.771	447.737	656.287	607.328
PARG02339	120.829	55.9043	220.176	159.599	126.852	221.821
PARG02341	0	0.539574	0	0	0	11.9215
PARG02343	392.73	246.584	194.726	386.677	246.31	108.331
PARG02344	0.47721	0.28276	0.453385	0.360734	1.91773	2.68738
PARG02345	16.401	21.4447	16.8312	24.3168	30.8984	28.623
PARG02346	1.09227	2.77253	2.92234	1.70197	6.9367	3.13186
PARG02347	2.52313	1.68796	3.05094	1.08205	5.26932	2.36915
PARG02348	4.76742	4.62307	5.64517	5.45281	24.1415	12.4316
PARG02349	31.2288	27.7624	11.0956	12.1889	10.6819	13.8857
PARG02351	64.55	38.1855	29.6414	38.18	22.3652	26.1846
PARG02352	7.89561	14.1519	6.84585	20.9237	126.232	37.7762
PARG02353	31.8336	76.9528	46.5495	22.416	160.842	80.645
PARG02354	107.449	58.1068	58.7524	89.3639	69.8272	95.3492
PARG02355	914.441	2128.7	1094.18	751.974	1001.47	911.534
PARG02356	319.798	355.519	394.537	250.775	104.737	377.071
PARG02357	196.034	397.104	170.103	79.1332	69.415	129.125
PARG02358	334.523	356.506	268.848	472.146	398.345	376.869
PARG02360	11.8228	3.83325	30.3546	31.0325	25.1465	133.626
PARG02361	0	0.175905	1.25626	0.448825	0.0634947	3.38928
PARG02362	70.9862	58.1721	82.2994	63.9083	53.1608	50.7091
PARG02363	8849.63	8133.05	6142.4	8222.24	6806.31	8098.15
PARG02364	230.976	254.832	307.342	290.695	312.005	290.587
PARG02365	359.717	292.673	346.71	366.823	339.075	257.659
PARG02366	2973.07	3191.31	1478.07	3001.14	2321.58	3106.72
PARG02367	633.579	413.594	331.435	528.558	300.033	376.656
PARG02368	43.0366	40.1691	202.957	78.0523	46.0502	95.4769
PARG02369	566.113	574.563	776.871	677.401	760.361	693.517
PARG02370	1608.92	2690.76	2131.94	1384.35	1779.66	2763.03
PARG02371	2608.85	2560.08	2486.23	2323.65	2336.24	2140.28
PARG02372	82.9135	69.3188	139.329	95.7616	67.9868	118.068
PARG02373	509.305	405.55	397.054	539.89	349.304	318.018
PARG02374	19.8931	13.6464	21.0844	14.6981	26.3956	13.6242
PARG02375	29.5673	17.9018	38.7607	27.2811	45.8039	21.2904
PARG02376	303.196	127.491	67.4212	80.7338	2112.5	2329.3
PARG02377	308.129	213.84	415.574	238.249	201.976	235.386
PARG02378	152.221	79.8492	198.022	92.7567	34.5868	46.0971
PARG02380	324.158	358.304	298.222	340.724	360.93	542.287
PARG02381	250.519	296.925	525.539	251.854	270.122	198.654
PARG02382	33.578	89.3029	55.4078	27.2477	198.745	97.8292
PARG02383	6.49606	13.5771	7.04834	15.89	97.1372	30.9851
PARG02384	30.7975	19.5868	18.4032	32.0671	14.8382	21.6661
PARG02386	0.874598	0.496737	0.393975	0.515727	1.70079	1.37085
PARG02388	5.52587	3.74274	9.24133	6.75625	3.31403	7.08549
PARG02393	1.48255	1.7569	1.33567	6.99376	46.9676	15.0898
PARG02394	0.400888	0.237537	0.855866	0.472785	0.373116	0.823888
PARG02396	2.481	4.22733	5.83188	4.85595	37.395	10.3843
PARG02397	201.342	150.78	94.0667	191.264	155.847	86.9988
PARG02398	129.744	143.864	97.8881	161.945	139.712	86.4335
PARG02399	0	0.681099	0.540197	0.114655	0.451642	0.925448
PARG02400	99.3005	163.993	88.623	95.7556	158.876	131.905
PARG02401	10722.5	45436	16981.8	10379.2	20766.3	18373.2
PARG02402	762.406	1249.5	596.517	831.83	875.419	1002.74
PARG02406	6.31528	3.58683	8.53441	2.51635	5.03962	3.24211
PARG02407	32.1126	100.707	36.571	51.0626	60.3313	102.655
PARG02408	193.709	378.92	216.527	243.555	249.688	349.351
PARG02409	143.463	327.383	176.511	161.815	123.655	76.3641
PARG02410	38.1719	29.0987	38.8124	45.0289	41.1758	31.2381
PARG02411	63.5111	33.206	43.6139	53.4007	51.97	39.9277
PARG02412	10791.2	10623.9	12068.3	10424.3	11149	7397.46
PARG02413	717.052	1023.3	454.418	795.28	830.349	928.017
PARG02414	59.3868	26.7107	48.5564	57.2255	39.2693	30.1722
PARG02416	0	0.168302	1.65792	0.21556	1.3299	0.751872
PARG02417	18.8143	22.1579	139.475	22.5975	11.7319	47.4004
PARG02418	1287.94	1040.46	2479.15	1227.12	891.778	841.348
PARG02419	120.913	132.369	102.86	57.1577	69.6215	45.6058
PARG02420	2.63612	2.08314	4.8118	1.14589	0.958927	1.10968
PARG02421	14.283	15.7561	12.4334	12.4267	10.5584	9.05477
PARG02423	70.8501	94.1599	63.7541	73.5983	61.8092	50.25
PARG02424	12.8516	24.9079	22.6959	8.47571	39.8673	23.4884
PARG02425	0.51241	0.594645	0.316157	0.700761	0.614599	0.402001
PARG02426	2.67605	5.49392	3.93891	1.51558	3.50114	2.73185
PARG02427	2.27232	0.617381	0	1.33993	1.06218	0.61239
PARG02428	10.9078	34.0255	26.3691	5.43472	13.5405	7.00915
PARG02429	47455.9	38629.3	24002.9	40760.2	62383	131725
PARG02430	109.284	47.7805	133.567	68.076	38.3543	49.3273
PARG02431	91.2838	139.887	93.1497	101.468	91.4739	82.331
PARG02432	193.944	238.919	240.968	259.106	280.042	313.839
PARG02437	522.881	376.948	761.754	391.508	352.197	379.457
PARG02438	223.507	519.648	157.142	215.786	200.298	215.646
PARG02439	0	0	5.40738	0	0	1.86563
PARG02440	0	0	13.6118	0	0	2.68594
PARG02441	597.593	254.121	450.447	461.858	307.786	158.896
PARG02443	911.534	1242.34	1294.89	1453.1	654.688	502.007
PARG02444	73.308	72.3934	91.0876	93.25	100.866	77.6081
PARG02445	605.976	1853.85	548.144	742.984	1203.32	619.214
PARG02446	1859.02	3520.31	1346.04	1522.92	3085.28	4045.77
PARG02447	226.101	152.541	156.35	249.455	254.854	309.81
PARG02448	116.517	137.238	96.7041	82.2639	77.7357	122.323
PARG02449	130.921	88.4941	121.331	119.74	140.998	102.081
PARG02450	3699.96	2656.32	3517.25	2767.77	3521.88	3188.52
PARG02451	1663.48	586.405	1523.14	688.723	398.621	2148.23
PARG02452	292.912	296.864	332.895	327.777	404.267	408.735
PARG02453	273.321	124.302	216.872	129.847	359.597	154.252
PARG02454	0	0.252011	5.22283	0	0	4.94568
PARG02455	348.684	283.344	226.644	404.819	246.554	219.722
PARG02456	0.352545	0	0.835428	0.267549	0	0.53393
PARG02457	75.9807	66.0973	160.634	77.5189	97.7953	42.2856
PARG02458	0	1.05543	0.549511	0	0.229863	1.35179
PARG02459	976.077	444.034	783.811	656.64	961.421	1339.66
PARG02460	436.814	468.077	422.152	370.983	1022.44	546.055
PARG02461	14.8105	15.7872	12.6187	3.35598	3.90317	3.17214
PARG02462	6.86831	3.15449	0.228766	9.39147	1.61687	3.16265
PARG02463	0.623432	1.41634	0.622947	0.738962	0.591096	0.30408
PARG02464	47.7835	81.7688	60.7484	27.1067	40.0781	83.9486
PARG02465	4.21627	6.03848	3.44747	0.816822	0.899055	1.36808
PARG02466	42.3922	20.2408	96.5961	17.9492	7.82154	26.9393
PARG02467	211.463	81.701	431.006	160.983	74.1725	319.956
PARG02468	138.017	149.801	166.857	139.303	134.578	133.235
PARG02469	24.1567	14.2301	16.6644	42.883	14.919	10.9709
PARG02470	11.2796	10.027	17.7717	27.0695	7.28556	12.2652
PARG02471	2.24091	0.940796	3.90626	2.17172	2.15964	1.42368
PARG02473	9.01254	0.860508	5.40162	12.1256	6.69772	1.21842
PARG02474	44.416	62.4971	51.7214	50.1222	38.3837	38.9159
PARG02475	45.7672	225.261	51.4613	31.2606	51.7891	175.124
PARG02476	62.2482	154.955	59.4632	64.4817	52.8887	47.3738
PARG02477	98.0821	70.4696	90.2322	106.693	305.865	112.492
PARG02478	9.88406	7.71107	11.0237	14.5629	5.00815	40.7944
PARG02481	0	0.480221	7.19105	0	0.28146	5.40426
PARG02482	163.289	192.371	138.736	185.266	287.958	268.719
PARG02483	543.29	1003.28	541.152	463.868	494.802	322.851
PARG02484	0.667962	0	1.2364	0	0.160084	0.505816
PARG02486	25.892	24.333	41.5562	20.7843	15.5791	32.8031
PARG02488	2.07811	1.79595	5.82093	1.2254	0.263467	0
PARG02489	62.129	70.8424	77.0552	48.6938	33.3512	44.6892
PARG02490	29.5709	39.5573	80.3883	35.439	23.1904	46.3292
PARG02491	6.23432	12.3164	22.7731	6.04184	12.0291	10.9726
PARG02493	32.4676	42.1647	36.7693	28.4743	25.9779	28.5245
PARG02494	17.367	27.0721	35.2856	18.4453	15.1488	39.6881
PARG02495	6.67439	12.9033	6.74202	5.86131	6.90769	3.49976
PARG02496	46.1655	32.9854	39.8666	52.0231	40.6107	30.6165
PARG02497	102.859	152.541	184.008	129.253	144.987	250.184
PARG02498	92.6696	125.576	82.1691	74.9742	95.9525	139.027
PARG02501	57.9586	44.1867	54.3713	68.2433	55.9093	26.683
PARG02502	57.3697	38.723	31.0861	33.6748	20.4466	17.3989
PARG02503	45.3703	56.5943	38.3283	55.7707	31.1979	24.3181
PARG02504	188.322	270.838	298.441	266.875	328.792	148.23
PARG02505	0	0	5.97204	0	0.335086	8.27819
PARG02506	396.782	248.456	363.648	546.763	734.409	317.933
PARG02507	192.908	215.683	310.987	217.689	274.089	287.132
PARG02508	241.178	106.429	84.3442	81.269	69.1344	130.245
PARG02509	10.1308	23.7671	19.9413	14.5306	20.3953	561.55
PARG02510	946.931	1218.95	929.502	884.912	983.607	1083.27
PARG02511	149.809	205.038	124.668	142.007	180.717	254.007
PARG02512	11.8321	18.8492	6.37059	8.85831	23.1711	31.6803
PARG02513	8.01555	17.0227	2.62962	13.3237	7.50247	6.50492
PARG02514	3.0622	5.39906	1.5416	5.67823	3.31289	1.72243
PARG02515	0.974502	0.842188	0.324582	0.760981	0.855542	2.00598
PARG02517	61.7703	51.1239	104.134	56.0515	72.7798	57.2095
PARG02518	166.02	167.857	212.437	217.237	251.333	106.195
PARG02519	0	3.89368	3.21727	0.837704	0.667598	3.20517
PARG02520	2773.15	2971.03	5013.94	2547.45	2878.5	3565.91
PARG02521	504.492	509.785	557.843	496.294	470.428	830.16
PARG02522	7.01361	4.04088	11.4248	6.43189	5.38253	17.9857
PARG02523	60.476	36.5116	15.3244	35.504	63.8585	222.26
PARG02526	97.1316	74.8612	78.1245	88.1177	63.3139	72.5751
PARG02527	3.00171	4.44649	7.76059	2.86096	2.3959	8.37506
PARG02528	0.446945	0	0.253799	0.187913	0.309823	0.894899
PARG02531	1501.94	1194.36	1047.28	1337.09	1411.16	1247.51
PARG02532	224.66	230.208	263.386	267.03	251.826	238.138
PARG02535	285.536	239.737	237.834	429.214	432.564	278.197
PARG02536	182.566	129.381	276.47	140.456	268.162	409.04
PARG02537	301.874	367.082	382.378	313.098	327.132	344.03
PARG02538	918.312	1151.46	1184.45	1035.49	1153.31	899.636
PARG02539	1742.76	1055.92	1335.43	686.453	4304.2	3410.7
PARG02543	333.021	358.367	290.665	329.019	410.13	321.498
PARG02544	292.968	304.909	348.359	405.797	445.7	548.78
PARG02546	11.0066	13.7148	21.7241	12.7	15.6395	9.98017
PARG02547	166.326	380.986	216.446	168.756	136.569	178.311
PARG02548	4.54464	10.2131	6.89844	66.0866	57.9989	67.5025
PARG02549	252.942	324.489	292.94	184.072	160.256	225.971
PARG02550	43.1287	25.8261	96.9986	66.9149	54.8801	74.365
PARG02551	451.326	452.154	353.371	550.269	612.138	338.217
PARG02552	282.867	288.523	132.35	320.658	359.819	236.017
PARG02553	0	0	1.28722	0.314139	0.208281	2.93625
PARG02554	159.853	206.861	244.121	119.983	144.385	232.73
PARG02555	18.3007	33.181	26.7799	83.4298	39.4974	57.7413
PARG02556	178.536	163.939	146.492	209.24	185.308	104.791
PARG02557	173.229	182.686	145.645	200.897	208.337	208.357
PARG02558	5.74342	7.56439	1.81889	8.1843	10.1379	5.48874
PARG02563	28.5059	27.6598	30.1497	2.29318	2.09739	3.49187
PARG02564	46.3659	36.4718	33.0042	1.75943	1.26602	2.326
PARG02565	6.18148	4.32477	4.59402	5.09254	4.8683	2.64141
PARG02566	54.4771	46.5384	81.2859	87.3041	89.303	58.6248
PARG02569	41.444	14.3268	21.8597	11.0255	17.1957	66.874
PARG02578	192.29	216.67	177.946	206.274	214.641	120.132
PARG02579	193.272	178.401	140.227	157.673	139.655	92.2173
PARG02584	3.18244	2.51486	3.71514	1.98051	1.96556	2.30572
PARG02593	61.6719	54.0153	47.7541	44.8092	44.0098	25.1332
PARG02594	79.1164	1.62026	11.6216	25.6036	24.5646	4.53207
PARG02595	345.107	367.433	194.462	277.155	193.674	174.1
PARG02596	242.01	155.147	475.925	177.593	197.675	276.744
PARG02598	16.3199	10.9972	14.7091	70.0703	55.6477	46.0889
PARG02599	46.6676	27.865	41.5346	17.9105	17.7408	14.935
PARG02600	78.4603	65.9729	67.2536	76.8868	106.123	98.1546
PARG02602	91.1769	113.437	77.9691	152.914	149.767	118.25
PARG02604	194.134	153.6	83.6888	15.8688	8.00235	2.85452
PARG02605	0	0	0	1.58819	3.43903	0
PARG02612	0	1.10696	0.276687	0.574638	6.67212	2.81723
PARG02613	113.509	114.842	86.0762	263.396	233.427	246.932
PARG02614	350.524	178.276	281.33	316.146	206.175	176.755
PARG02615	186.288	139.751	106.864	259.93	246.802	174.195
PARG02616	0	0	8.45534	0.546657	0.329685	0
PARG02617	202.319	249.727	173.937	280.797	332.762	290.014
PARG02619	158.861	103.067	162.345	138.524	223.121	313.91
PARG02620	141.938	54.1843	66.5622	109.278	85.9025	213.035
PARG02626	283.268	357.106	222.627	285.423	278.625	197.72
PARG02627	704.138	433.395	219.587	1029.5	1092.32	633.801
PARG02629	91.3611	60.987	109.127	178.891	62.0391	100.274
PARG02630	0	0	6.68415	0.400658	0.0796665	2.99839
PARG02632	56.4321	41.3919	16.6029	60.4477	71.0991	42.9963
PARG02637	57.8275	32.5531	13.1538	60.0359	52.4478	47.1787
PARG02638	103.339	150.834	102.138	101.211	98.0747	103.514
PARG02639	3.05834	4.38011	4.79266	4.24977	5.09586	9.43567
PARG02640	1244.19	1236.33	1009.25	1514.03	1341.72	1553.43
PARG02641	493.327	511.904	376.968	382.845	368.579	513.027
PARG02642	279.838	401.222	408.598	414.925	516.374	319.334
PARG02649	282.495	259.61	237.212	204.065	167.58	155.52
PARG02650	212.58	276.94	228.673	242.397	294.176	231.969
PARG02651	225.395	346.994	373.146	258.435	274.424	201.479
PARG02652	298.071	207.711	234.042	352.342	345.237	176.497
PARG02653	5.96658	2.50494	0	20.6051	10.3512	52.3662
PARG02657	14.3519	6.21262	18.8673	11.9055	13.559	28.1974
PARG02658	19.6012	29.8849	36.464	24.0561	25.1232	75.5102
PARG02659	12.1151	8.02623	18.7868	12.1182	11.3162	19.0619
PARG02660	4.65188	7.42831	10.4242	8.49422	9.3172	23.4223
PARG02661	368.113	414.843	367.016	434.732	390.492	208.85
PARG02662	1122.93	1334.78	1131.9	1203.49	1148.47	934.674
PARG02663	296.451	254.388	261.754	277.952	377.432	248.172
PARG02664	2371.55	1668.65	1651.42	2244.19	1788.51	2094.92
PARG02665	248.132	303.356	375.378	230.217	243.646	138.541
PARG02666	248.803	333.381	293.684	316.193	377.2	322.653
PARG02668	15.0567	30.3236	8.92918	23.7079	21.72	25.7645
PARG02667	19.653	34.7355	10.2981	26.3672	25.3394	31.0584
PARG02669	55.3543	70.8524	70.7979	41.422	152.885	78.7993
PARG02670	432.293	444.243	388.064	409.374	449.983	293.121
PARG02671	912.259	1330.99	647.897	1008.66	1644.43	1474.77
PARG02672	5.00847	6.00375	4.12943	2.673	1.79904	0.467495
PARG02673	2.9378	0.974082	1.98907	1.3034	1.0975	3.65618
PARG02674	15.4886	50.5346	14.0229	4.15276	78.5812	114.053
PARG02675	492.231	442.348	367.962	367.202	1350.17	1301.27
PARG02676	150.601	268.476	438.24	183.162	529.424	449.576
PARG02677	46.4823	195.833	441.511	80.5491	203.527	223.769
PARG02678	0	0.727607	367.251	0.516287	1.09431	452.799
PARG02679	0	0	57.3765	0.47674	0.707055	13.978
PARG02680	1.54865	1.68305	3.82208	14.0281	47.6386	53.6659
PARG02681	96.5892	99.9046	65.2574	95.1519	343.988	262.73
PARG02682	45.7227	39.6309	129.56	64.2714	53.1745	101.697
PARG02683	215.436	302.678	234.931	234.02	226.999	227.271
PARG02684	5.45503	2.23217	8.47184	2.11117	2.32399	0.800137
PARG02685	548.069	145.912	492.644	287.905	90.5121	187.026
PARG02686	2298.83	4207.48	3130.29	3157.17	4046.26	1695.85
[truncated: 20,448 more rows]

## Sheet: DESeq2_HCR
gene_id	baseMean	log2FoldChange	lfcSE	stat	pvalue	padj	DEG
PARG23769	4545.54	4.87849	0.230205	728.312	7.06521e-159	1.17268e-154	yes
PARG24682	1102.59	1.90907	0.094169	633.895	2.2462e-138	1.86412e-134	yes
PARG26555	1094.43	-6.6178	0.392013	580.564	8.55366e-127	4.73246e-123	yes
PARG17853	100.571	9.07639	0.903966	540.089	5.26259e-118	2.18371e-114	yes
PARG01144	4876.11	3.8469	0.212764	456.527	7.35062e-100	2.44011e-96	yes
PARG18240	1545.36	2.64947	0.180254	446.71	9.95669e-98	2.75435e-94	yes
PARG00508	13393.6	4.5598	0.35413	433.928	5.94045e-95	1.40857e-91	yes
PARG04471	1095.13	1.85233	0.101867	423.407	1.14395e-92	2.3734e-89	yes
PARG07913	180.149	-4.01935	0.256017	422.725	1.60875e-92	2.9669e-89	yes
PARG27772	1595.51	4.20186	0.326213	407.14	3.89718e-89	6.46854e-86	yes
PARG02090	563.403	2.63185	0.175062	400.581	1.03491e-87	1.56158e-84	yes
PARG20136	757.071	2.24305	0.161697	393.79	3.08731e-86	4.27026e-83	yes
PARG02868	5349.69	2.2567	0.184226	388.739	3.85855e-85	4.92648e-82	yes
PARG07631	910.203	3.07738	0.204415	380.681	2.16897e-83	2.57146e-80	yes
PARG11883	1979.18	2.54598	0.183054	359.715	7.74089e-79	8.56556e-76	yes
PARG12001	569.566	3.98901	0.296231	355.302	7.0328e-78	7.29565e-75	yes
PARG07972	1199.67	2.5221	0.183699	350.576	7.47237e-77	7.29567e-74	yes
PARG24635	223.956	2.51605	0.182324	345.74	8.38421e-76	7.73117e-73	yes
PARG06124	469.857	4.13428	0.279318	332.95	5.0224e-73	4.38746e-70	yes
PARG25508	345.132	1.74302	0.134971	326.326	1.37815e-71	1.14372e-68	yes
PARG00605	77.7321	5.68685	0.469991	322.482	9.41609e-71	7.4423e-68	yes
PARG05624	425.862	3.2791	0.369556	320.612	2.39883e-70	1.80981e-67	yes
PARG02979	312.669	3.61847	0.328898	311.053	2.85545e-68	2.06064e-65	yes
PARG08684	212.671	2.29258	0.185692	305.303	5.06171e-67	3.5006e-64	yes
PARG26664	1863.07	-1.56675	0.167426	304.138	9.06124e-67	6.01594e-64	yes
PARG30438	506.416	1.85301	0.134412	303.256	1.40892e-66	8.99432e-64	yes
PARG09016	1098.99	3.94396	0.338638	300.443	5.74956e-66	3.53449e-63	yes
PARG04388	5210.32	-3.82601	0.306503	299.829	7.81749e-66	4.6341e-63	yes
PARG25518	1196.53	2.50218	0.197586	295.075	8.41736e-65	4.81763e-62	yes
PARG15408	80.4868	6.26022	0.526561	292.917	2.47681e-64	1.37034e-61	yes
PARG08008	2360.18	2.75322	0.199274	290.606	7.86398e-64	4.21053e-61	yes
PARG00710	5228.08	3.42925	0.292208	288.075	2.78781e-63	1.446e-60	yes
PARG27773	610.263	3.19287	0.294856	287.173	4.37593e-63	2.20096e-60	yes
PARG00998	1429.55	-1.2682	0.0765722	283.929	2.2158e-62	1.0817e-59	yes
PARG04069	156.642	5.72723	0.519039	279.156	2.41008e-61	1.14293e-58	yes
PARG11159	4093.62	1.5959	0.163929	278.178	3.93048e-61	1.81217e-58	yes
PARG02869	3490.53	2.49695	0.256675	272.802	5.77843e-60	2.59217e-57	yes
PARG19087	563.027	1.2584	0.111725	272.208	7.77499e-60	3.39603e-57	yes
PARG04098	614.371	-3.73151	0.217219	271.764	9.71127e-60	4.13302e-57	yes
PARG19868	2087.25	1.02925	0.075852	269.813	2.57551e-59	1.06871e-56	yes
PARG23893	30.7548	5.46214	0.611336	245.617	4.62229e-54	1.87124e-51	yes
PARG14807	642.497	1.49228	0.111936	245.534	4.81899e-54	1.90442e-51	yes
PARG18241	463.427	2.03381	0.164092	244.296	8.9489e-54	3.45427e-51	yes
PARG25843	86.5135	2.31832	0.207711	244.122	9.76134e-54	3.68224e-51	yes
PARG16770	815.074	2.78382	0.238712	240.56	5.79392e-53	2.13706e-50	yes
PARG03146	588.395	1.7442	0.14414	237.184	3.13427e-52	1.13093e-49	yes
PARG24434	104.81	4.44585	0.409296	235.693	6.60577e-52	2.33282e-49	yes
PARG08689_DAM3	3606.19	-2.47881	0.203506	235.171	8.57569e-52	2.9654e-49	yes
PARG27613	3602.08	2.0742	0.175546	234.255	1.3554e-51	4.59119e-49	yes
PARG02097	234.416	1.72631	0.294871	232.131	3.92108e-51	1.30164e-48	yes
PARG19870	691.431	1.40379	0.1343	231.808	4.60726e-51	1.49944e-48	yes
PARG00046	379.297	-2.77867	0.232205	226.834	5.54209e-50	1.76899e-47	yes
PARG28297	5874.19	2.77344	0.235236	222.49	4.86307e-49	1.52297e-46	yes
PARG04570	1065.06	2.48342	0.237061	220.588	1.25866e-48	3.86873e-46	yes
PARG05528	879.448	2.67836	0.211123	216.246	1.10359e-47	3.33042e-45	yes
PARG06248	650.037	-1.20165	0.102733	213.514	4.32504e-47	1.28191e-44	yes
PARG21463	1335.23	2.89019	0.328844	212.87	5.96994e-47	1.70843e-44	yes
PARG28131	954.674	4.98187	0.436072	212.871	5.96452e-47	1.70843e-44	yes
PARG16514	511.763	2.3264	0.188935	212.296	7.9518e-47	2.23702e-44	yes
PARG22396	2226.35	4.9846	0.470526	210.048	2.44664e-46	6.76822e-44	yes
PARG01257	665.235	1.97325	0.143642	209.222	3.69812e-46	1.00625e-43	yes
PARG08302	58.198	-1.85024	0.235656	208.368	5.66969e-46	1.51783e-43	yes
PARG27111	212.683	-2.65516	0.195748	208.016	6.75824e-46	1.78053e-43	yes
PARG08235	793.481	2.28964	0.25051	206.222	1.6576e-45	4.29888e-43	yes
PARG12590	58.9918	5.16122	0.500544	202.587	1.0206e-44	2.60614e-42	yes
PARG15461	2297.83	1.95333	0.16506	201.591	1.67947e-44	4.22361e-42	yes
PARG06780	1255.5	1.85642	0.155282	199.117	5.78431e-44	1.41188e-41	yes
PARG07918	24.6934	9.476	1.28756	199.137	5.72746e-44	1.41188e-41	yes
PARG10107	943.812	-3.7307	0.342969	198.701	7.12123e-44	1.71302e-41	yes
PARG18539	797.434	3.88505	0.261144	197.584	1.24524e-43	2.95263e-41	yes
PARG08581	46.0035	6.01405	0.641015	196.256	2.41862e-43	5.65413e-41	yes
PARG07355	100.024	3.21977	0.305594	195.886	2.90956e-43	6.70735e-41	yes
PARG07978	203.04	5.26951	0.508971	194.971	4.59704e-43	1.04523e-40	yes
PARG27023	258.368	-2.56093	0.190881	194.779	5.06151e-43	1.13528e-40	yes
PARG04070	147.894	2.53211	0.215585	194.649	5.40084e-43	1.19524e-40	yes
PARG04043	123.381	3.63784	0.356156	192.52	1.56616e-42	3.4204e-40	yes
PARG06879	1271.36	1.25397	0.112377	192.351	1.70381e-42	3.6727e-40	yes
PARG02041	93.2797	3.62561	0.361146	188.474	1.18431e-41	2.52015e-39	yes
PARG21590	8750.32	1.83644	0.188383	187.997	1.50311e-41	3.15805e-39	yes
PARG15204	2823.73	-1.73765	0.135989	187.256	2.17693e-41	4.51658e-39	yes
PARG26468	499.276	1.36388	0.151662	186.057	3.96524e-41	8.12532e-39	yes
PARG26589	405.055	1.21877	0.140049	185.996	4.08744e-41	8.27358e-39	yes
PARG08215	170.125	4.07989	0.474626	185.84	4.4185e-41	8.83593e-39	yes
PARG00606	1155.04	1.90788	0.21239	183.885	1.17439e-40	2.32055e-38	yes
PARG28188	91.9838	6.08734	0.503149	182.174	2.76389e-40	5.39706e-38	yes
PARG20005	2877.07	1.62194	0.209823	181.443	3.98232e-40	7.68589e-38	yes
PARG15321	984.916	2.18476	0.244694	180.229	7.30681e-40	1.394e-37	yes
PARG00455	73.6166	2.74069	0.327229	180.082	7.86587e-40	1.48361e-37	yes
PARG21222	696.506	1.6214	0.16853	179.9	8.61328e-40	1.60633e-37	yes
PARG25188	114.77	1.88076	0.256886	179.705	9.49739e-40	1.75153e-37	yes
PARG24559	108.949	3.8593	0.363276	176.165	5.57568e-39	1.01698e-36	yes
PARG02819	6441.45	1.60452	0.175654	175.87	6.46058e-39	1.16557e-36	yes
PARG28239	6037.28	-2.01325	0.173638	175.508	7.74251e-39	1.38183e-36	yes
PARG09363	189.066	-3.17029	0.246603	174.134	1.53896e-38	2.71742e-36	yes
PARG23509	584.693	1.56554	0.203442	173.939	1.69703e-38	2.96497e-36	yes
PARG15363	237.095	1.32	0.158142	173.858	1.76714e-38	3.0553e-36	yes
PARG24496	120.545	7.89367	0.807606	173.65	1.96009e-38	3.35398e-36	yes
PARG14187	42.8677	2.34625	0.328434	172.945	2.78915e-38	4.72392e-36	yes
PARG06250	271.107	2.60683	0.269193	172.311	3.82923e-38	6.41996e-36	yes
PARG21465	3311.72	1.14078	0.145995	169.195	1.81834e-37	3.01807e-35	yes
PARG14062	98.2996	3.55449	0.323432	168.068	3.19445e-37	5.24966e-35	yes
PARG06673	214.623	6.91278	0.694125	167.252	4.8041e-37	7.81749e-35	yes
PARG12140	218.504	4.97802	0.402209	167.17	5.00518e-37	8.06562e-35	yes
PARG07698	548.898	2.00477	0.217056	166.281	7.80742e-37	1.24603e-34	yes
PARG19083	550.867	1.0506	0.0936017	166.23	8.00927e-37	1.25844e-34	yes
PARG28226	78.7311	5.87016	0.508797	166.223	8.03677e-37	1.25844e-34	yes
PARG10314	49.4991	5.88613	0.670472	165.764	1.01101e-36	1.56829e-34	yes
PARG24077	65.6962	-4.0608	0.389536	165.646	1.07259e-36	1.64842e-34	yes
PARG06315	1089.03	2.18022	0.21465	165.099	1.41025e-36	2.14746e-34	yes
PARG08688_DAM2	1898.14	-3.42468	0.294398	177.393	5.30924e-27	3.88206e-34	yes
PARG06143	1649.29	1.76489	0.164245	163.035	3.95697e-36	5.97071e-34	yes
PARG13079	155.595	1.73228	0.158646	162.846	4.3501e-36	6.50478e-34	yes
PARG27158	296.358	2.21667	0.17124	161.741	7.5577e-36	1.12002e-33	yes
PARG00575	111.449	3.76029	0.409776	159.534	2.27792e-35	3.34593e-33	yes
PARG09190	718.561	-3.75911	0.276455	159.495	2.32301e-35	3.38221e-33	yes
PARG20630	3316.86	-1.9415	0.179161	157.91	5.13263e-35	7.40794e-33	yes
PARG00345	339.279	2.29681	0.27562	156.717	9.31693e-35	1.33312e-32	yes
PARG16043	908.314	1.68765	0.174312	156.66	9.58651e-35	1.35997e-32	yes
PARG27100	1753.22	2.16178	0.178461	155.998	1.33508e-34	1.87794e-32	yes
PARG01783	369.33	1.84335	0.158847	154.765	2.4724e-34	3.44848e-32	yes
PARG12085	378.512	1.95428	0.20674	154.27	3.16736e-34	4.38099e-32	yes
PARG04100	2510.81	-2.61746	0.216694	154.234	3.2246e-34	4.4233e-32	yes
PARG08690_DAM6	10353.8	-5.21451	0.521594	88.0615	2.68091e-13	4.55453e-32	yes
PARG04186	5229.7	1.32613	0.126276	154.073	3.49473e-34	4.75455e-32	yes
PARG11037	282.753	2.3074	0.299744	153.736	4.13635e-34	5.58172e-32	yes
PARG20259	177.586	3.68583	0.314043	153.561	4.51457e-34	6.04297e-32	yes
PARG10507	86.796	3.01382	0.455681	153.196	5.4181e-34	7.19436e-32	yes
PARG06231	945.359	2.15044	0.197386	152.967	6.07736e-34	8.00571e-32	yes
PARG08672	87.9183	2.61787	0.437372	152.652	7.11272e-34	9.29582e-32	yes
PARG16505	423.679	2.19798	0.209955	152.292	8.51619e-34	1.10431e-31	yes
PARG24290	410.508	-2.50082	0.221009	152.211	8.86558e-34	1.1407e-31	yes
PARG05759	38.8368	9.13268	1.32625	150.7	1.88795e-33	2.41047e-31	yes
PARG07683	289.411	1.76074	0.185448	150.646	1.93891e-33	2.45665e-31	yes
PARG07617	4831.66	1.48261	0.18143	150.146	2.48979e-33	3.13073e-31	yes
PARG05773	522.671	-4.69113	0.378237	149.891	2.82822e-33	3.52953e-31	yes
PARG03089	135.919	2.38898	0.278674	149.176	4.0445e-33	5.00975e-31	yes
PARG18849	410.129	4.76956	0.398907	149.074	4.25613e-33	5.23283e-31	yes
PARG25310	87.6173	5.45248	0.617529	149.036	4.33772e-33	5.29393e-31	yes
PARG18986	446.582	-1.63189	0.200815	148.761	4.97738e-33	6.03026e-31	yes
PARG27379	203.609	-5.11791	0.412529	147.832	7.91982e-33	9.5256e-31	yes
PARG27547	1384.61	2.45412	0.249746	147.66	8.62999e-33	1.03051e-30	yes
PARG13837	32.394	7.99777	1.18849	147.437	9.64888e-33	1.14394e-30	yes
PARG20891	76.7866	3.10862	0.512499	147.081	1.15267e-32	1.35689e-30	yes
PARG07028	1739.35	1.18702	0.174042	146.886	1.27072e-32	1.48531e-30	yes
PARG29427	2325.27	4.09924	0.427378	146.524	1.52334e-32	1.76814e-30	yes
PARG27709	5999.4	1.94944	0.198501	146.295	1.70752e-32	1.96815e-30	yes
PARG15382	496.468	1.00779	0.114981	146.014	1.96564e-32	2.25005e-30	yes
PARG11645	1005.51	1.2049	0.155967	145.992	1.98725e-32	2.25921e-30	yes
PARG22729	11250.7	1.2138	0.181657	145.674	2.32949e-32	2.63027e-30	yes
PARG24906	280.756	5.26126	0.603809	145.355	2.73299e-32	3.06501e-30	yes
PARG29436	206.432	-1.5764	0.197377	145.268	2.85343e-32	3.17861e-30	yes
PARG12309	663.4	2.31515	0.188165	145	3.26279e-32	3.61039e-30	yes
PARG05748	567.589	1.88362	0.154284	142.644	1.05997e-31	1.16513e-29	yes
PARG04445	75.0148	8.22018	1.00748	141.197	2.18543e-31	2.38644e-29	yes
PARG09491	1778.92	2.19531	0.284464	140.749	2.73404e-31	2.96598e-29	yes
PARG04341	1048.17	-1.52361	0.20028	140.633	2.89673e-31	3.12207e-29	yes
PARG12588	806.177	5.16916	0.516	139.858	4.26874e-31	4.57114e-29	yes
PARG27751	268.689	2.42049	0.254737	139.445	5.24704e-31	5.58271e-29	yes
PARG20854	138.91	11.0183	1.45275	139.379	5.42352e-31	5.73373e-29	yes
PARG06475	536.273	2.63073	0.295794	138.851	7.05997e-31	7.3699e-29	yes
PARG25705	1763.27	1.59868	0.176217	138.857	7.03916e-31	7.3699e-29	yes
PARG27868	290.994	-1.47499	0.1657	138.376	8.95629e-31	9.29103e-29	yes
PARG12160	370.521	3.01211	0.501663	137.596	1.32264e-30	1.36355e-28	yes
PARG23417	220.093	0.976411	0.14862	137.382	1.4719e-30	1.50806e-28	yes
PARG25285	1107.44	2.37363	0.262459	137.157	1.64699e-30	1.6771e-28	yes
PARG24029	972.687	-1.28466	0.113023	137.095	1.69881e-30	1.71932e-28	yes
PARG07258	3958.92	0.559397	0.10087	136.63	2.14376e-30	2.15649e-28
PARG10724	684.148	2.25658	0.220272	136.444	2.3526e-30	2.35231e-28	yes
PARG00359	844.588	-0.391005	0.0955473	136.357	2.45687e-30	2.44187e-28
PARG18553	896.052	-1.19472	0.135064	135.549	3.681e-30	3.63674e-28	yes
PARG20068	701.105	9.88287	1.02074	135.411	3.94425e-30	3.87377e-28	yes
PARG02040	1360.55	-1.86229	0.156531	134.834	5.26283e-30	5.13838e-28	yes
PARG29655	76.8462	3.00043	0.355918	134.797	5.36037e-30	5.203e-28	yes
PARG26478	279.589	0.249554	0.109837	134.372	6.62907e-30	6.39705e-28	yes
PARG12958	3802.13	2.45389	0.303376	134.235	7.09937e-30	6.81129e-28	yes
PARG15816	470.086	-2.3286	0.219253	133.491	1.02965e-29	9.82194e-28	yes
PARG21022	2112.47	4.13724	0.489667	133.384	1.08666e-29	1.03065e-27	yes
PARG00659	368.06	1.54698	0.149229	133.246	1.16441e-29	1.08796e-27	yes
PARG07643	850.121	-1.063	0.118458	133.258	1.15702e-29	1.08796e-27	yes
PARG11138	376.571	1.75881	0.227046	133.241	1.16675e-29	1.08796e-27	yes
PARG10210	379.06	2.07856	0.219292	133.11	1.24635e-29	1.15569e-27	yes
PARG11501	381.294	1.6037	0.170405	132.982	1.32845e-29	1.22498e-27	yes
PARG05417	3425.37	2.02406	0.267898	132.264	1.90187e-29	1.74405e-27	yes
PARG21232	229.618	5.16003	0.524381	131.717	2.49995e-29	2.2799e-27	yes
PARG07597	175.827	1.78492	0.169183	131.546	2.7233e-29	2.47001e-27	yes
PARG22879	729.18	1.87605	0.228675	130.754	4.04604e-29	3.6498e-27	yes
PARG26135	150.927	2.07495	0.33774	130.565	4.44737e-29	3.99013e-27	yes
PARG15345	582.477	1.11012	0.221535	130.456	4.69739e-29	4.19179e-27	yes
PARG27756	634.561	-1.12176	0.112417	130.054	5.7418e-29	5.09638e-27	yes
PARG13808	2103.49	4.36482	0.47259	129.721	6.78444e-29	5.98979e-27	yes
PARG15817	1224.1	2.22	0.187414	129.66	6.99493e-29	6.14296e-27	yes
PARG12237	247.59	1.74471	0.176599	129.531	7.45859e-29	6.51567e-27	yes
PARG13596	659.762	1.30428	0.161387	129.471	7.6864e-29	6.67952e-27	yes
PARG19866	1948.4	-1.69706	0.161972	129.171	8.92963e-29	7.71948e-27	yes
PARG08690_DAM5	8517.52	-6.05847	0.657897	56.5086	5.36183e-13	9.10907e-27	yes
PARG20458	1572.37	-0.884125	0.100804	128.803	1.07344e-28	9.23157e-27	yes
PARG08312	144.868	1.21335	0.184935	128.16	1.48086e-28	1.26698e-26	yes
PARG12767	224.555	1.53998	0.184138	128.065	1.55265e-28	1.32158e-26	yes
PARG21652	1814.38	-0.617342	0.397494	127.965	1.6321e-28	1.38212e-26	yes
PARG27163	542.31	1.7786	0.242989	127.849	1.72941e-28	1.4571e-26	yes
PARG18033	11.8537	8.39455	1.29433	127.833	1.74387e-28	1.46186e-26	yes
PARG09138	583.345	-0.800393	0.107449	127.016	2.6229e-28	2.18769e-26	yes
PARG27271	1661.98	2.67115	0.413639	126.611	3.21248e-28	2.66604e-26	yes
PARG12091	14.5112	4.00249	0.578113	125.671	5.1384e-28	4.24315e-26	yes
PARG12331	434.949	4.93304	0.394185	125.644	5.20895e-28	4.28011e-26	yes
PARG23371	817.155	1.52279	0.173479	125.336	6.07726e-28	4.96898e-26	yes
PARG19327	185.714	2.75925	0.335332	124.997	7.19881e-28	5.85715e-26	yes
PARG11888	579.566	1.71977	0.187833	124.845	7.76563e-28	6.28751e-26	yes
PARG03954	467.71	1.33018	0.141653	124.784	8.00667e-28	6.4512e-26	yes
PARG23729	89.3958	-7.98907	0.990603	124.655	8.53894e-28	6.84682e-26	yes
PARG18979	315.288	3.14909	0.447935	124.522	9.1287e-28	7.28452e-26	yes
PARG16248	22.7467	4.70358	0.663994	124.191	1.07728e-27	8.55533e-26	yes
PARG07337	39.0891	3.59522	0.402674	124.025	1.17033e-27	9.25009e-26	yes
PARG12863	498.642	1.30304	0.197702	123.548	1.48594e-27	1.16889e-25	yes
PARG29160	815.26	1.85439	0.227078	123.089	1.86839e-27	1.46281e-25	yes
PARG17798	214.702	1.57276	0.163966	122.736	2.22929e-27	1.73717e-25	yes
PARG06476	14.5213	4.98327	0.750906	122.521	2.48205e-27	1.9251e-25	yes
PARG02775	634.427	2.2619	0.200539	122.453	2.56894e-27	1.98322e-25	yes
PARG29738	1559.31	2.37125	0.273434	122.215	2.89294e-27	2.22301e-25	yes
PARG24428	21.4044	3.69493	0.514683	122.019	3.19031e-27	2.44022e-25	yes
PARG23414	53.5104	-2.37384	0.295686	121.93	3.33606e-27	2.53999e-25	yes
PARG27282	718.276	3.85275	0.359522	121.544	4.04561e-27	3.06617e-25	yes
PARG03339	2694.06	1.05872	0.0973043	120.948	5.44999e-27	4.11177e-25	yes
PARG02814	446.11	-0.583408	0.128658	120.937	5.48088e-27	4.11637e-25	yes
PARG03597	15.9348	5.93123	0.915636	120.904	5.57199e-27	4.16594e-25	yes
PARG27166	753.492	2.54047	0.390728	120.821	5.80812e-27	4.32301e-25	yes
PARG06349	19.7536	5.20776	0.727752	120.407	7.14393e-27	5.29352e-25	yes
PARG21246	17.4147	3.65101	0.477548	120.344	7.37201e-27	5.43825e-25	yes
PARG27652	1028.96	4.34177	0.497675	119.859	9.39666e-27	6.90114e-25	yes
PARG08688_DAM1	190.095	-4.37055	0.38529	119.614	1.06185e-26	7.76413e-25	yes
PARG00033	855.536	1.22866	0.216446	119.593	1.07351e-26	7.81496e-25	yes
PARG21289	642.017	2.81288	0.24353	119.011	1.43576e-26	1.04064e-24	yes
PARG11474	206.925	7.68832	0.93822	118.856	1.55138e-26	1.11955e-24	yes
PARG24673	2556.03	2.38362	0.29481	118.817	1.58182e-26	1.13658e-24	yes
PARG15438	171.59	-1.08555	0.188892	118.603	1.76045e-26	1.25948e-24	yes
PARG25399	670.938	-0.936477	0.116272	118.295	2.05419e-26	1.46333e-24	yes
PARG12589	34.592	5.63654	0.699366	118.206	2.14782e-26	1.52349e-24	yes
PARG24498	654.555	1.24108	0.12846	118.097	2.26756e-26	1.60157e-24	yes
PARG22997	211.872	2.34227	0.321332	117.955	2.43415e-26	1.71195e-24	yes
PARG12945	686.001	1.62042	0.214821	117.869	2.542e-26	1.78026e-24	yes
PARG23707	436.204	3.19234	0.414397	117.715	2.74416e-26	1.91377e-24	yes
PARG22728	20349.4	1.14907	0.189694	117.693	2.77495e-26	1.92714e-24	yes
PARG07761	1168.73	-2.30332	0.206944	117.511	3.03971e-26	2.10221e-24	yes
PARG15435	301.806	-1.04769	0.127122	117.242	3.47798e-26	2.39533e-24	yes
PARG09243	33.6817	4.59745	0.594744	117.178	3.59003e-26	2.46229e-24	yes
PARG25092	1022.15	0.84615	0.115569	117.027	3.87193e-26	2.6447e-24	yes
PARG19439	13.1551	8.57899	1.34251	116.285	5.611e-26	3.81686e-24	yes
PARG00465	533.674	1.45691	0.175116	115.98	6.53456e-26	4.42696e-24	yes
PARG01021	496.777	1.47222	0.141616	115.026	1.05286e-25	7.1038e-24	yes
PARG05886	143.964	2.22699	0.25383	114.438	1.41303e-25	9.49536e-24	yes
PARG08072	2433.42	-0.890286	0.087902	114.302	1.51227e-25	1.01212e-23
PARG19501	564.375	2.14462	0.213666	114.259	1.54494e-25	1.02983e-23	yes
PARG14142	4410.64	2.86238	0.314214	114.12	1.65673e-25	1.09994e-23	yes
PARG05515	1406.93	3.40244	0.434674	114.097	1.67591e-25	1.10824e-23	yes
PARG00280	1206.45	4.16505	0.471315	113.983	1.77354e-25	1.16815e-23	yes
PARG12685	144.896	-1.82343	0.193174	113.882	1.86534e-25	1.22375e-23	yes
PARG11160	153.412	2.86852	0.398916	113.658	2.08678e-25	1.36364e-23	yes
PARG07699	50.5382	7.01708	0.907655	113.301	2.49519e-25	1.62412e-23	yes
PARG14527	2797.57	2.94087	0.496924	113.012	2.88217e-25	1.86868e-23	yes
PARG11442	245.596	7.94015	0.981171	112.953	2.96798e-25	1.91683e-23	yes
PARG04029	497.891	1.27163	0.14469	112.825	3.16488e-25	2.03607e-23	yes
PARG12714	197.897	0.979643	0.197916	112.59	3.56022e-25	2.28157e-23	yes
PARG24622	926.326	-0.649152	0.251033	112.513	3.6995e-25	2.36171e-23	yes
PARG02837	523.34	2.46262	0.339027	112.301	4.11343e-25	2.61589e-23	yes
PARG06019	507.971	-1.35467	0.133418	112.227	4.26703e-25	2.70322e-23	yes
PARG18961	649.871	1.62847	0.163144	112.049	4.66425e-25	2.94362e-23	yes
PARG18329	736.032	1.00299	0.172181	111.908	5.00558e-25	3.14707e-23	yes
PARG05088	508.027	-0.868141	0.0991284	111.702	5.54873e-25	3.47539e-23
PARG13342	1133.32	1.94252	0.204512	111.421	6.38635e-25	3.98499e-23	yes
PARG20863	414.206	1.13345	0.165171	111.284	6.83816e-25	4.25093e-23	yes
PARG07604	202.776	-2.39136	0.225503	111.187	7.17705e-25	4.44495e-23	yes
PARG22522	623.223	3.38585	0.366923	110.875	8.39002e-25	5.17686e-23	yes
PARG26025	1212	0.828314	0.160505	110.866	8.42662e-25	5.18019e-23	yes
PARG29369	373.618	-5.01507	0.435653	110.197	1.17796e-24	7.21467e-23	yes
PARG01912	62.5864	3.44405	0.372434	110.076	1.25101e-24	7.63392e-23	yes
PARG12694	593.869	-0.977334	0.131624	110.04	1.27399e-24	7.74565e-23	yes
PARG12932	688.115	2.02055	0.250961	109.754	1.46993e-24	8.90432e-23	yes
PARG07229	43.7077	2.39289	0.462761	109.687	1.51953e-24	9.17133e-23	yes
PARG01897	132.564	3.06107	0.312937	109.664	1.53694e-24	9.24279e-23	yes
PARG17821	539.664	5.41879	0.714282	109.406	1.74937e-24	1.04823e-22	yes
PARG18638	115.518	-2.46022	0.284011	108.856	2.30304e-24	1.37503e-22	yes
PARG16307	662.087	0.38578	0.137139	108.697	2.49319e-24	1.48323e-22	yes
PARG03123	3578.5	-2.52926	0.230861	108.66	2.53978e-24	1.50555e-22	yes
PARG15846	1545.15	1.86403	0.30003	108.484	2.77338e-24	1.63817e-22	yes
PARG20652	67.3413	2.69414	0.363299	108.26	3.10155e-24	1.82552e-22	yes
PARG26339	367.95	-3.21817	0.320531	108.05	3.44507e-24	2.02054e-22	yes
PARG06125	131.69	-1.6165	0.244765	107.795	3.914e-24	2.28748e-22	yes
PARG23927	470.831	1.94943	0.219459	107.456	4.63731e-24	2.70071e-22	yes
PARG12973	48.3611	2.18208	0.27433	107.281	5.0598e-24	2.93645e-22	yes
PARG12591	85.484	5.59866	0.672438	107.205	5.2582e-24	3.04096e-22	yes
PARG19187	211.566	1.31782	0.16982	107.052	5.67555e-24	3.27093e-22	yes
PARG13130	228.693	-0.30082	0.310676	106.626	7.02058e-24	4.0321e-22	yes
PARG25438	213.981	-3.69799	0.365895	106.521	7.4016e-24	4.23627e-22	yes
PARG10216	515.41	2.20608	0.264529	106.468	7.59755e-24	4.33348e-22	yes
PARG04088	181.148	-1.37307	0.169903	106.298	8.27423e-24	4.70328e-22	yes
PARG29768	824.539	0.904404	0.0933757	106.209	8.65138e-24	4.90087e-22
PARG06037	902.856	2.83316	0.276207	105.883	1.01799e-23	5.74711e-22	yes
PARG01976	289.804	1.35059	0.168026	105.606	1.16908e-23	6.57779e-22	yes
PARG12894	1662.39	-0.599424	0.096905	105.416	1.28588e-23	7.2105e-22
PARG28025	927.319	1.00792	0.108994	105.314	1.3535e-23	7.56408e-22	yes
PARG16246	10.1055	4.36565	0.687366	105.14	1.47638e-23	8.22312e-22	yes
PARG19161	57.0623	3.01684	0.427684	105.124	1.48812e-23	8.2608e-22	yes
PARG06052	366.796	4.23515	0.552707	104.982	1.59757e-23	8.83882e-22	yes
PARG29546	596.354	-1.29406	0.29405	104.588	1.94508e-23	1.07258e-21	yes
PARG09810	332.092	2.0222	0.216125	104.521	2.01121e-23	1.10536e-21	yes
PARG23904	1222.14	5.3545	0.487375	104.387	2.15102e-23	1.17831e-21	yes
PARG02876	248.007	1.11553	0.193225	104.281	2.26759e-23	1.23807e-21	yes
PARG23105	888.682	-0.785579	0.0917713	104.163	2.40577e-23	1.30921e-21
PARG16762	181.619	2.24555	0.346729	103.71	3.01742e-23	1.6367e-21	yes
PARG13908	166.713	1.14527	0.219583	103.484	3.37897e-23	1.82684e-21	yes
PARG24430	239.768	1.52002	0.264061	103.131	4.0307e-23	2.17213e-21	yes
PARG13060	2298.94	-1.02977	0.215597	103.119	4.05417e-23	2.17771e-21	yes
PARG13061	1659.56	-0.311483	0.0862361	103.026	4.24805e-23	2.27449e-21
PARG03072	489.911	-0.682951	0.102618	102.669	5.07708e-23	2.70963e-21
PARG00635	1004.38	2.47598	0.309717	102.119	6.68718e-23	3.55749e-21	yes
PARG12202	1039.87	0.653706	0.13307	102.048	6.92843e-23	3.66243e-21	yes
PARG22836	878.62	2.02135	0.195943	102.048	6.92855e-23	3.66243e-21	yes
PARG13140	315.843	7.50419	0.977609	102.037	6.96392e-23	3.66943e-21	yes
PARG22922	248.187	1.59383	0.248463	101.947	7.28731e-23	3.82768e-21	yes
PARG21390	95.0948	2.03796	0.228229	101.751	8.03555e-23	4.20738e-21	yes
PARG19107	67.4631	-4.68578	0.519512	101.517	9.03412e-23	4.70057e-21	yes
PARG27631	280.52	-1.44856	0.149171	101.52	9.02034e-23	4.70057e-21	yes
PARG27390	112.926	-2.48345	0.261278	101.178	1.07036e-22	5.5518e-21	yes
PARG14143	65.891	-0.307661	0.279609	101.063	1.13348e-22	5.86092e-21	yes
PARG16065	182.72	1.06104	0.273777	100.89	1.23576e-22	6.3699e-21	yes
PARG27038	434.876	2.30806	0.337807	100.883	1.2405e-22	6.37454e-21	yes
PARG20647	663.63	1.53114	0.21315	100.853	1.25893e-22	6.44929e-21	yes
PARG26008	643.791	1.44293	0.196374	100.623	1.41236e-22	7.21302e-21	yes
PARG05147	979.17	0.616856	0.206796	100.526	1.48305e-22	7.55083e-21	yes
PARG27587	233.866	2.01476	0.29806	100.476	1.52061e-22	7.71836e-21	yes
PARG13506	1327.18	-0.954243	0.108918	100.467	1.52739e-22	7.72917e-21
PARG15938	287.649	1.48867	0.159586	100.34	1.62728e-22	8.20959e-21	yes
PARG18421	237.714	-2.45633	0.259691	100.322	1.64217e-22	8.25962e-21	yes
PARG02117	34.0564	2.60211	0.319062	100.05	1.88071e-22	9.43082e-21	yes
PARG13158	84.7746	2.79981	0.447444	99.9719	1.95606e-22	9.77913e-21	yes
PARG13810	30.9054	4.45397	0.589268	99.9457	1.98182e-22	9.87815e-21	yes
PARG08664	1009.06	0.510051	0.074485	99.8222	2.10808e-22	1.0476e-20
PARG07273	618.067	1.51411	0.19729	99.7054	2.23487e-22	1.10729e-20	yes
PARG00243	20.7476	2.60664	0.42954	99.6939	2.24769e-22	1.11033e-20	yes
PARG26448	10.777	4.98449	0.807594	99.5056	2.46959e-22	1.21633e-20	yes
PARG16677	595.175	-0.931128	0.168192	99.4	2.60354e-22	1.27851e-20	yes
PARG20428	1665.62	-1.07235	0.127536	99.3332	2.6919e-22	1.318e-20	yes
PARG13005	169.396	1.44525	0.270993	99.1993	2.87837e-22	1.40515e-20	yes
PARG19772	76.0613	11.1065	1.52247	99.1676	2.92434e-22	1.42341e-20	yes
PARG27727	146.089	3.82933	0.370464	98.921	3.30808e-22	1.60548e-20	yes
PARG18092	296.166	-1.25028	0.147368	98.8686	3.39599e-22	1.64334e-20	yes
PARG12048	73.8205	3.20562	0.501629	98.7828	3.5448e-22	1.71037e-20	yes
PARG28329	715.544	1.31831	0.183687	98.2883	4.53897e-22	2.18371e-20	yes
PARG16260	199.656	5.25657	0.478818	98.2745	4.57042e-22	2.19248e-20	yes
PARG16069	72.5937	0.745051	0.218531	98.214	4.7109e-22	2.25336e-20	yes
PARG26183	1138.25	-1.0693	0.115475	98.0992	4.98911e-22	2.37957e-20	yes
PARG27636	113.689	-3.06899	0.313973	97.9003	5.51092e-22	2.62092e-20	yes
PARG05276	921.247	-1.64871	0.255857	97.8049	5.78e-22	2.73491e-20	yes
PARG06828	1067.52	2.86102	0.509565	97.8037	5.78354e-22	2.73491e-20	yes
PARG00251	32.5571	4.24334	0.576741	97.6806	6.15083e-22	2.90032e-20	yes
PARG12715	822.119	3.32459	0.400785	97.6523	6.23837e-22	2.93327e-20	yes
PARG02835	1452.82	-2.58498	0.248667	97.2651	7.57111e-22	3.54987e-20	yes
PARG16136	575.156	-2.30014	0.322745	97.0896	8.26548e-22	3.86452e-20	yes
PARG07750	5634.89	-1.83728	0.430261	97.0413	8.46753e-22	3.94787e-20	yes
PARG20631	184.397	-1.87134	0.232935	97.0217	8.55079e-22	3.97552e-20	yes
PARG03933	356.157	-1.0865	0.146917	96.9612	8.81321e-22	4.08608e-20	yes
PARG00515	72.9572	-2.35385	0.259163	96.9045	9.06695e-22	4.18037e-20	yes
PARG24243	207.331	3.76077	0.544264	96.9098	9.04279e-22	4.18037e-20	yes
PARG02077	1419.71	0.722902	0.0954662	96.7307	9.89015e-22	4.54728e-20
PARG05929	203.599	5.4383	0.736058	96.6382	1.03582e-21	4.74931e-20	yes
PARG16686	62.5644	4.80953	0.658378	96.3599	1.19044e-21	5.44323e-20	yes
PARG26839	979.901	-0.579377	0.145535	96.3502	1.19625e-21	5.45477e-20	yes
PARG27745	85.1588	0.105731	0.289377	96.1076	1.35049e-21	6.14123e-20	yes
PARG15525	83.4195	1.63706	0.450668	96.0192	1.41157e-21	6.40144e-20	yes
PARG05108	102.986	11.5278	1.50826	95.992	1.43085e-21	6.4712e-20	yes
PARG22531	18477.5	-1.68833	0.200201	95.9431	1.46627e-21	6.61334e-20	yes
PARG04508	966.318	1.24991	0.165843	95.7653	1.60258e-21	7.20856e-20	yes
PARG06041	3298.89	3.38166	0.334188	95.6473	1.69998e-21	7.62604e-20	yes
PARG18328	4970.53	0.775249	0.0988299	95.5612	1.77478e-21	7.9401e-20
PARG05709	319.76	-1.37492	0.17386	95.4262	1.89876e-21	8.47195e-20	yes
PARG03626	10.7668	6.39267	1.20761	95.0146	2.3326e-21	1.03797e-19	yes
PARG18061	210.646	12.586	1.68128	94.8316	2.55605e-21	1.13437e-19	yes
PARG23275	280.578	-1.61396	0.179996	94.7876	2.61292e-21	1.15651e-19	yes
PARG19691	298.541	-2.1671	0.245983	94.7622	2.64631e-21	1.16818e-19	yes
PARG03774	344.421	1.28332	0.183237	94.392	3.18451e-21	1.40203e-19	yes
PARG21032	111.786	0.97819	0.165501	94.3589	3.23765e-21	1.42166e-19	yes
PARG05718	319.629	-1.38417	0.175637	94.1253	3.63875e-21	1.59356e-19	yes
PARG16763	62.3974	2.07821	0.315451	94.0613	3.75703e-21	1.64103e-19	yes
PARG05460	56.8503	1.53473	0.260115	93.8508	4.17397e-21	1.81836e-19	yes
PARG20085	303.568	-1.61872	0.170426	93.8021	4.27694e-21	1.85834e-19	yes
PARG15948	17.6999	3.74165	0.638165	93.544	4.86605e-21	2.10879e-19	yes
PARG18249	68.5726	-1.99575	0.279079	93.2148	5.73682e-21	2.47968e-19	yes
PARG28179	318.09	1.81945	0.232387	92.9323	6.60712e-21	2.84844e-19	yes
PARG13496	44.0145	6.85775	0.999333	92.8909	6.74531e-21	2.90048e-19	yes
PARG12852	551.48	0.679482	0.104144	92.8472	6.89419e-21	2.95684e-19
PARG04989	326.362	-1.66338	0.173825	92.8246	6.97269e-21	2.9828e-19	yes
PARG16884	696.839	-1.30401	0.13577	92.7864	7.10717e-21	3.03252e-19	yes
PARG13339	41.6084	3.61662	0.487492	92.7563	7.21471e-21	3.07051e-19	yes
PARG04414	872.222	0.866492	0.162233	92.6963	7.43443e-21	3.15593e-19	yes
PARG17976	59.2058	7.01305	0.923043	92.5346	8.06067e-21	3.41304e-19	yes
PARG00561	2429.19	0.828193	0.14578	92.4408	8.44765e-21	3.56779e-19	yes
PARG08073	117.875	-4.47047	0.472933	92.222	9.42448e-21	3.97024e-19	yes
PARG05645	239.554	-0.972746	0.135395	92.1435	9.80171e-21	4.1083e-19	yes
PARG15384	878.291	4.2242	0.400078	92.1464	9.78733e-21	4.1083e-19	yes
PARG03645	128.482	1.20155	0.215396	92.0987	1.00237e-20	4.19077e-19	yes
PARG02715	60.0504	2.03274	0.322787	91.8359	1.1431e-20	4.76715e-19	yes
PARG00914	1252.13	1.52122	0.216903	91.6956	1.22615e-20	5.10066e-19	yes
PARG21545	62.9133	6.54333	0.841728	91.6832	1.23379e-20	5.11961e-19	yes
PARG27355	2445.34	-1.74751	0.279378	91.6716	1.24099e-20	5.13665e-19	yes
PARG27726	2051.77	3.54067	0.339298	91.5957	1.28896e-20	5.32193e-19	yes
PARG07373	136.778	-3.39991	0.383048	91.46	1.3795e-20	5.68163e-19	yes
PARG02825	3803.93	-3.07445	0.322038	91.0923	1.65787e-20	6.81124e-19	yes
PARG13723	204.415	8.17995	0.950486	90.8591	1.8629e-20	7.63466e-19	yes
PARG30033	14.2542	3.01313	0.519926	90.7935	1.92501e-20	7.86977e-19	yes
PARG27236	617.636	1.98563	0.311758	90.6679	2.04981e-20	8.35941e-19	yes
PARG05510	11.318	5.86309	1.04181	90.6084	2.11168e-20	8.59059e-19	yes
PARG07997	1640.55	1.10768	0.204964	90.4648	2.26892e-20	9.2077e-19	yes
PARG06093	181.276	2.28729	0.262644	90.3083	2.45362e-20	9.93295e-19	yes
PARG24349	135.422	2.58008	0.498051	90.276	2.49356e-20	1.00701e-18	yes
PARG16380	262.69	1.30883	0.19097	90.2077	2.58013e-20	1.03944e-18	yes
PARG16278	1785.55	2.85303	0.281133	90.1766	2.62061e-20	1.05319e-18	yes
PARG01496	3099.75	2.03389	0.207533	90.1487	2.65741e-20	1.0654e-18	yes
PARG19947	263.825	1.41375	0.152402	90.0779	2.75324e-20	1.10116e-18	yes
PARG26672	647.669	1.11627	0.128127	90.0624	2.77453e-20	1.10701e-18	yes
PARG11549	70.0468	4.65525	0.488686	90.0004	2.86197e-20	1.13916e-18	yes
PARG10840	321.894	3.97926	0.467144	89.9952	2.86933e-20	1.13936e-18	yes
PARG28000	461.964	-1.28609	0.152315	89.9072	2.99845e-20	1.18779e-18	yes
PARG19033	1189.46	-1.13896	0.121198	89.8473	3.08963e-20	1.22099e-18	yes
PARG25242	341.833	2.45865	0.309387	89.6725	3.37175e-20	1.32932e-18	yes
PARG20635	719.597	1.42378	0.1719	89.6323	3.44031e-20	1.35313e-18	yes
PARG22469	369.309	2.35196	0.281687	89.4956	3.6837e-20	1.44544e-18	yes
PARG15955	1663.8	0.692214	0.142213	89.3254	4.01084e-20	1.57009e-18	yes
PARG15793	1614	3.32522	0.332031	89.3009	4.06032e-20	1.58572e-18	yes
PARG06135	185.162	-0.81384	0.178867	89.2516	4.16152e-20	1.62143e-18	yes
PARG28279	1756.04	1.10364	0.130051	89.13	4.42255e-20	1.7191e-18	yes
PARG06199	309.32	6.23234	0.565752	89.1244	4.43497e-20	1.7199e-18	yes
PARG19830	8076.46	2.79479	0.278974	88.883	5.0038e-20	1.93147e-18	yes
PARG21480	148.096	2.60295	0.494098	88.8845	5.00011e-20	1.93147e-18	yes
PARG29433	930.047	1.28459	0.176245	88.8521	5.08175e-20	1.95701e-18	yes
PARG02948	195.629	-1.72091	0.191825	88.7665	5.30405e-20	2.03789e-18	yes
PARG00338	450.605	3.45163	0.42224	88.6325	5.67156e-20	2.17406e-18	yes
PARG19581	3531.01	5.07325	0.469225	88.2866	6.74242e-20	2.57859e-18	yes
PARG30216	591.989	4.44364	0.693848	88.159	7.18635e-20	2.74205e-18	yes
PARG12245	3520.49	2.22919	0.433477	88.1411	7.25111e-20	2.76041e-18	yes
PARG15527	140.915	1.20188	0.403094	88.1151	7.34599e-20	2.79013e-18	yes
PARG08730	88.3299	2.60256	0.357547	87.9371	8.02984e-20	3.0429e-18	yes
PARG29740	411.808	-2.51285	0.282401	87.8734	8.28973e-20	3.13423e-18	yes
PARG20782	626.966	3.25834	0.326813	87.8156	8.53269e-20	3.21876e-18	yes
PARG02091	80.2894	3.58327	0.486223	87.7412	8.85623e-20	3.33324e-18	yes
PARG10320	541.216	-0.64912	0.110406	87.722	8.94149e-20	3.35771e-18
PARG28101	45.3865	-1.07181	0.438182	87.6769	9.14548e-20	3.42656e-18	yes
PARG13128	575.552	5.34372	0.720139	87.6634	9.20731e-20	3.44196e-18	yes
PARG25095	46.2207	7.48047	1.09706	87.6547	9.24749e-20	3.44921e-18	yes
PARG08691	215.86	-1.65457	0.192684	87.6298	9.36342e-20	3.48462e-18	yes
PARG06885	85.8507	6.41976	0.71217	87.559	9.70083e-20	3.60211e-18	yes
PARG00404	4692.75	2.93723	0.296676	87.5047	9.96769e-20	3.69294e-18	yes
PARG07392	341.937	-1.14886	0.162731	87.2731	1.11916e-19	4.13716e-18	yes
PARG08627	177.014	1.35047	0.208253	87.2419	1.13676e-19	4.19286e-18	yes
PARG06923	159.896	2.42508	0.293424	87.1648	1.18143e-19	4.34799e-18	yes
PARG21000	195.604	1.56047	0.292173	87.0819	1.23141e-19	4.52189e-18	yes
PARG24659	341.454	-1.93651	0.227789	86.7066	1.48557e-19	5.44317e-18	yes
PARG19026	374.498	3.8296	0.426366	86.623	1.54898e-19	5.66297e-18	yes
PARG01263	31.6168	-3.06983	0.396764	86.3443	1.78064e-19	6.47499e-18	yes
PARG10301	1276.8	1.50698	0.168253	86.3419	1.78279e-19	6.47499e-18	yes
PARG16271	56.6039	6.39377	0.862092	86.3453	1.7797e-19	6.47499e-18	yes
PARG25454	1035.52	-0.824914	0.133939	86.3045	1.81641e-19	6.58269e-18	yes
PARG23884	1020.27	-0.908096	0.15041	86.2041	1.90991e-19	6.90648e-18	yes
PARG13389	36.5792	4.47147	0.755984	86.1462	1.96607e-19	7.09408e-18	yes
PARG16418	160.384	1.54139	0.219095	86.1041	2.00781e-19	7.22897e-18	yes
PARG29215	5331.45	1.73313	0.184771	86.0102	2.10433e-19	7.56009e-18	yes
PARG22993	94.1862	6.70445	0.913905	85.9532	2.16523e-19	7.76208e-18	yes
PARG17729	1192.86	6.00595	0.769068	85.8337	2.29853e-19	8.22218e-18	yes
PARG21131	392.375	0.926871	0.136508	85.7753	2.36657e-19	8.4474e-18	yes
PARG20855	1048.92	1.81882	0.229016	85.6615	2.50518e-19	8.92296e-18	yes
PARG12003	1364.59	-1.06497	0.14657	85.6426	2.52897e-19	8.98841e-18	yes
PARG05519	632.595	2.00449	0.302017	85.5872	2.6e-19	9.22111e-18	yes
PARG03437	100.368	0.723373	0.372856	85.5769	2.61344e-19	9.24901e-18	yes
PARG26935	250.448	-2.28912	0.245624	85.543	2.65805e-19	9.38688e-18	yes
PARG06878	41.03	2.42131	0.494794	85.1327	3.26341e-19	1.15002e-17	yes
PARG19771	446.29	-1.06733	0.139345	85.0117	3.46685e-19	1.21913e-17	yes
PARG00412	30.9196	-5.23993	1.30292	84.9953	3.49543e-19	1.22658e-17	yes
PARG16231	1444.09	1.08187	0.135936	84.7647	3.9226e-19	1.37357e-17	yes
PARG11674	1580.13	-0.866219	0.150339	84.711	4.02949e-19	1.40803e-17	yes
PARG11337	151.232	-1.60575	0.204732	84.6644	4.12442e-19	1.43817e-17	yes
PARG20101	720.123	1.69401	0.348533	84.6538	4.14624e-19	1.44275e-17	yes
PARG06009	1716.24	2.16666	0.398927	84.3514	4.82322e-19	1.67481e-17	yes
PARG16575	579.191	-0.728129	0.128123	84.3182	4.90394e-19	1.69928e-17	yes
PARG02772	564.606	1.30996	0.222745	84.2807	4.99669e-19	1.72781e-17	yes
PARG20667	53.2697	3.70628	0.646756	84.1853	5.24072e-19	1.80843e-17	yes
PARG07026	256.033	1.13435	0.221673	84.112	5.43629e-19	1.87202e-17	yes
PARG26424	288.845	-3.0725	0.361171	84.0738	5.54117e-19	1.90419e-17	yes
PARG17170	5789.77	1.12216	0.172116	84.0266	5.67362e-19	1.94568e-17	yes
PARG20461	170.35	-1.05576	0.152044	83.8978	6.05097e-19	2.0708e-17	yes
PARG21141	851.333	-2.67007	0.284846	83.8714	6.13136e-19	2.094e-17	yes
PARG21382	160.751	0.853739	0.320719	83.6775	6.75552e-19	2.30242e-17	yes
PARG15745	458.744	2.05927	0.219842	83.6557	6.82961e-19	2.32291e-17	yes
PARG22988	217.097	4.0093	0.450545	83.6306	6.91595e-19	2.34746e-17	yes
PARG06162	223.103	1.64013	0.180671	83.5949	7.04043e-19	2.38484e-17	yes
PARG12986	532.063	1.72847	0.352753	83.5521	7.19266e-19	2.43144e-17	yes
PARG08885	1405.58	1.0666	0.161552	83.4441	7.59175e-19	2.56114e-17	yes
PARG08814	12.6245	2.64172	0.629082	83.4394	7.60957e-19	2.56194e-17	yes
PARG28441	757.897	3.66438	0.367175	83.308	8.12645e-19	2.73042e-17	yes
PARG14232	4155.66	3.55515	0.438423	83.3017	8.15204e-19	2.73349e-17	yes
PARG27490	415.016	-0.917899	0.155294	83.2957	8.17667e-19	2.73622e-17	yes
PARG28158	1763.64	0.760263	0.129929	83.2347	8.42961e-19	2.81518e-17
PARG15331	665.835	-1.39806	0.15474	83.1033	9.00199e-19	3.0003e-17	yes
PARG08188	15.1867	5.89609	1.05641	83.0382	9.30008e-19	3.09344e-17	yes
PARG14233	1539.21	4.42798	0.485935	82.8118	1.04147e-18	3.45726e-17	yes
PARG06838	34.7622	3.11333	0.516182	82.7633	1.06702e-18	3.53361e-17	yes
PARG08068	30.6385	-3.53682	0.489854	82.7601	1.06873e-18	3.53361e-17	yes
PARG02125	55.3155	-0.0999096	0.314174	82.6522	1.12796e-18	3.72203e-17	yes
PARG18635	332.809	0.756066	0.239495	82.6215	1.14543e-18	3.76503e-17	yes
PARG26143	608.3	-2.89722	0.304965	82.6213	1.14552e-18	3.76503e-17	yes
PARG20384	167.984	5.55223	0.782246	82.6109	1.15154e-18	3.77731e-17	yes
PARG20242	780.658	-1.03067	0.138484	82.5361	1.19541e-18	3.91351e-17	yes
PARG28701	1360.06	1.26523	0.178689	82.4257	1.26326e-18	4.12748e-17	yes
PARG14320	240.052	-1.29908	0.153416	81.9291	1.61928e-18	5.28031e-17	yes
PARG07325	299.888	0.906681	0.157673	81.8403	1.69282e-18	5.50931e-17	yes
PARG10244	71.8856	-2.56996	0.41265	81.7646	1.75813e-18	5.71066e-17	yes
PARG06404	278.321	-0.68501	0.160904	81.4578	2.04959e-18	6.64437e-17	yes
PARG08867	171.641	-1.90423	0.257599	81.3757	2.13548e-18	6.90929e-17	yes
PARG05518	80.2369	5.39679	0.925172	81.3583	2.15407e-18	6.95587e-17	yes
PARG20118	3431.07	2.88988	0.435691	81.2902	2.22869e-18	7.18288e-17	yes
PARG06305	1759.8	1.2281	0.138038	81.2329	2.29356e-18	7.37761e-17	yes
PARG26534	856.958	4.78706	0.747298	81.1889	2.34451e-18	7.52692e-17	yes
PARG03743	2346.19	-0.806399	0.115225	81.1475	2.39356e-18	7.66956e-17
PARG24946	835.815	5.39881	0.789095	81.0636	2.49615e-18	7.98287e-17	yes
PARG07402	433.114	-1.14091	0.127368	81.0199	2.55124e-18	8.14335e-17	yes
PARG01827	185.488	4.84667	0.485483	80.9898	2.58999e-18	8.25118e-17	yes
PARG11582	255.519	-1.86799	0.209139	80.8792	2.7372e-18	8.70345e-17	yes
PARG18528	57.6161	2.40637	0.372791	80.7485	2.92198e-18	9.27323e-17	yes
PARG20785	96.7065	4.07706	0.648558	80.6825	3.0201e-18	9.56633e-17	yes
PARG07025	241.983	1.11899	0.21622	80.5052	3.30003e-18	1.04331e-16	yes
PARG22468	895.903	2.52544	0.298317	80.448	3.39579e-18	1.07031e-16	yes
PARG28290	278.687	2.32539	0.258391	80.4465	3.39833e-18	1.07031e-16	yes
PARG06082	5148.51	-0.868637	0.164902	80.3529	3.56117e-18	1.11736e-16	yes
PARG11580	66.878	1.61882	0.258356	80.3533	3.56049e-18	1.11736e-16	yes
PARG08146	213.479	3.25823	0.545154	80.332	3.59864e-18	1.12698e-16	yes
PARG11345	27.2795	-1.64235	0.513916	80.3279	3.60596e-18	1.12715e-16	yes
PARG18843	328.043	-2.04866	0.228714	80.1156	4.00972e-18	1.251e-16	yes
PARG06911	98.6503	4.00947	0.722768	79.8139	4.66274e-18	1.45201e-16	yes
PARG21030	124.147	5.30091	0.882033	79.7292	4.86424e-18	1.51192e-16	yes
PARG11133	107.067	7.37967	0.964732	79.6773	4.99213e-18	1.54588e-16	yes
PARG18597	246.676	1.86726	0.206851	79.678	4.99043e-18	1.54588e-16	yes
PARG02116	663.086	2.00328	0.29122	79.6694	5.01207e-18	1.54917e-16	yes
PARG27213	417.888	-1.14635	0.160575	79.6532	5.05275e-18	1.55884e-16	yes
PARG03176	461.836	1.06555	0.177473	79.5663	5.27709e-18	1.62503e-16	yes
PARG05557	432.815	0.494799	0.114076	79.2931	6.04957e-18	1.85946e-16
PARG13919	338.399	1.09507	0.162371	79.2566	6.16097e-18	1.8902e-16	yes
PARG22704	643.988	0.878807	0.0987306	79.2215	6.26999e-18	1.9201e-16
PARG28080	1386.43	2.05604	0.256759	79.0695	6.76496e-18	2.06786e-16	yes
PARG07228	14.0573	3.32476	0.675137	78.9813	7.0701e-18	2.15716e-16	yes
PARG12888	1103.38	5.48229	0.871374	78.9316	7.24808e-18	2.20741e-16	yes
PARG10469	1958.62	1.07762	0.133277	78.9231	7.27886e-18	2.21272e-16	yes
PARG19887	503.99	5.4815	0.544546	78.6462	8.35987e-18	2.53669e-16	yes
PARG11478	444.702	0.675551	0.124666	78.611	8.50831e-18	2.57702e-16
PARG24066	17461.8	2.17826	0.253983	78.2679	1.01004e-17	3.05366e-16	yes
PARG20272	108.459	2.85404	0.422292	78.2521	1.01804e-17	3.07226e-16	yes
PARG05800	2348.51	2.26696	0.310228	78.2087	1.04038e-17	3.13397e-16	yes
PARG12168	199.681	2.66863	0.489957	78.0394	1.13228e-17	3.40465e-16	yes
PARG09757	1012.79	2.04785	0.272001	78.0269	1.13939e-17	3.41982e-16	yes
PARG23397	132.131	2.1794	0.260348	77.9321	1.19471e-17	3.57939e-16	yes
PARG26289	2491.98	1.54164	0.208752	77.9236	1.1998e-17	3.58817e-16	yes
PARG19900	1208.96	3.1243	0.490727	77.9048	1.21115e-17	3.61558e-16	yes
PARG12472	416.678	1.17316	0.135123	77.8977	1.21545e-17	3.6219e-16	yes
PARG10815	92.0053	2.17299	0.310624	77.8933	1.21808e-17	3.62324e-16	yes
PARG05667	13.0829	4.2619	0.668549	77.8078	1.27128e-17	3.76799e-16	yes
PARG07222	25.144	3.51586	0.69576	77.8084	1.27091e-17	3.76799e-16	yes
PARG04653	132.469	-1.38626	0.181663	77.7917	1.28159e-17	3.79176e-16	yes
PARG22968	176.97	-1.24338	0.185386	77.7615	1.30108e-17	3.84258e-16	yes
PARG01095	107.678	1.93205	0.335411	77.7492	1.30908e-17	3.85934e-16	yes
PARG27959	1195.07	-1.44581	0.2445	77.7222	1.32687e-17	3.90486e-16	yes
PARG23999	7642.2	5.08005	0.494295	77.6833	1.35296e-17	3.9746e-16	yes
PARG22541	118.956	5.1251	0.772507	77.6074	1.4053e-17	4.12107e-16	yes
PARG19624	732.515	-1.94582	0.251586	77.5993	1.411e-17	4.13048e-16	yes
PARG21543	509.857	6.2635	0.798852	77.4228	1.54115e-17	4.50351e-16	yes
PARG08429	463.852	3.22135	0.68006	77.2273	1.69944e-17	4.94051e-16	yes
PARG18590	42.1849	-2.09518	0.302271	77.2338	1.69389e-17	4.94051e-16	yes
PARG22015	497.87	1.6369	0.227007	77.2271	1.69962e-17	4.94051e-16	yes
PARG24732	33.3134	4.91285	0.829947	77.2052	1.71831e-17	4.9861e-16	yes
PARG28062	90.1673	-5.71881	0.676586	77.1214	1.7918e-17	5.19029e-16	yes
PARG08340	37.3887	2.22876	0.486314	77.1014	1.80984e-17	5.2334e-16	yes
PARG10694	1226.41	5.63996	0.830395	77.0452	1.86139e-17	5.3731e-16	yes
PARG21512	6655.11	-1.56859	0.208986	76.9795	1.92359e-17	5.54302e-16	yes
PARG02251	7.62552	6.75174	1.34159	76.9592	1.9432e-17	5.58016e-16	yes
PARG14061	72.1456	4.34442	0.576247	76.961	1.94143e-17	5.58016e-16	yes
PARG13742	1833.17	0.624383	0.075426	76.8935	2.00816e-17	5.75674e-16
PARG07154	2145.83	-0.922615	0.115178	76.7171	2.19326e-17	6.27651e-16
PARG18117	504.382	2.10478	0.400275	76.6095	2.31447e-17	6.60062e-16	yes
PARG23987	385.496	2.16363	0.251572	76.6129	2.31057e-17	6.60062e-16	yes
PARG12917	481.279	-0.815109	0.166484	76.5417	2.39428e-17	6.81652e-16	yes
PARG30102	942.699	1.12474	0.19803	76.4607	2.49331e-17	7.0863e-16	yes
PARG23947	301.035	2.21864	0.24581	76.4244	2.53892e-17	7.20358e-16	yes
PARG12496	1033.19	-0.660755	0.110296	76.419	2.54586e-17	7.21096e-16
PARG05593	162.999	3.15336	0.53888	76.3417	2.64606e-17	7.46927e-16	yes
PARG20812	507.44	-0.417184	0.228507	76.3431	2.64434e-17	7.46927e-16	yes
PARG10860	640.955	1.23103	0.156417	76.2425	2.78072e-17	7.83605e-16	yes
PARG20043	271.5	1.465	0.207692	76.2194	2.81302e-17	7.91364e-16	yes
PARG10505	74.625	1.09033	0.226397	76.1896	2.85524e-17	8.01883e-16	yes
PARG25198	257.534	1.73566	0.205269	76.1627	2.89385e-17	8.11353e-16	yes
PARG27584	120.577	1.22317	0.20453	76.0604	3.04574e-17	8.52499e-16	yes
PARG13001	480.35	3.69733	0.406795	75.9677	3.19025e-17	8.91443e-16	yes
PARG02947	1069.02	-3.77881	0.415715	75.9477	3.22229e-17	8.98882e-16	yes
PARG17457	1014.3	3.42506	0.370706	75.9206	3.26618e-17	9.09599e-16	yes
PARG02812	104.326	2.46085	0.453162	75.7652	3.53026e-17	9.81494e-16	yes
PARG19580	66.7874	4.4683	0.507945	75.7412	3.57273e-17	9.91643e-16	yes
PARG13512	165.456	-2.04865	0.234159	75.6932	3.65963e-17	1.01407e-15	yes
PARG19047	69.7438	2.62623	0.495272	75.5947	3.84432e-17	1.06347e-15	yes
PARG09031	3050.36	-1.54427	0.174474	75.5759	3.88059e-17	1.07172e-15	yes
PARG25744	19.1916	2.86034	0.478181	75.5556	3.92023e-17	1.08086e-15	yes
PARG27160	144.105	2.73065	0.477684	75.4225	4.19007e-17	1.15335e-15	yes
PARG05259	1465.41	0.591702	0.101936	75.3455	4.35446e-17	1.19661e-15
PARG17968	43.1624	-3.28628	0.432102	75.3107	4.43085e-17	1.21559e-15	yes
PARG20549	203.455	-2.55411	0.294	75.2006	4.68172e-17	1.2823e-15	yes
PARG23938	391.89	-1.87116	0.233982	75.1095	4.89987e-17	1.33984e-15	yes
PARG22437	1328.35	-0.986361	0.121542	75.0539	5.0379e-17	1.37531e-15
PARG00478	13.48	4.4085	0.743366	74.854	5.56764e-17	1.51743e-15	yes
PARG22030	243.797	3.10778	0.36804	74.7616	5.83075e-17	1.58654e-15	yes
PARG15216	101.796	4.98332	0.53879	74.6491	6.16804e-17	1.67557e-15	yes
PARG07371	95.1817	-2.33528	0.283171	74.5613	6.44498e-17	1.74794e-15	yes
PARG14147	1277.15	5.31842	0.552963	74.5285	6.55164e-17	1.77397e-15	yes
PARG07895	2035.02	1.99518	0.273015	74.4701	6.7456e-17	1.82351e-15	yes
PARG07853	217.357	1.36885	0.445919	74.3655	7.10768e-17	1.91827e-15	yes
PARG20553	1290.75	-1.12857	0.164677	74.3307	7.23241e-17	1.94876e-15	yes
PARG10647	292.722	3.12701	0.519392	74.2985	7.35007e-17	1.97725e-15	yes
PARG08837	103.293	-1.66573	0.306961	74.2705	7.45361e-17	2.00186e-15	yes
PARG11724	82.3783	2.91519	0.49069	74.2076	7.6918e-17	2.0625e-15	yes
PARG13734	16.888	4.14752	0.688536	74.1337	7.98125e-17	2.13666e-15	yes
PARG29259	6093.76	5.14806	0.504901	74.0545	8.30351e-17	2.21935e-15	yes
PARG21133	386.747	-3.41283	0.40347	74.0339	8.3895e-17	2.23873e-15	yes
PARG00938	1698.74	1.75248	0.19865	73.9384	8.80004e-17	2.34451e-15	yes
PARG17271	15.0527	6.86742	1.29555	73.9024	8.95977e-17	2.38324e-15	yes
PARG23418	1172	1.00323	0.164231	73.8577	9.1624e-17	2.43324e-15	yes
PARG20244	275.718	-1.13718	0.154666	73.8436	9.22726e-17	2.44655e-15	yes
PARG20636	13.274	3.79093	0.652294	73.5947	1.04497e-16	2.76626e-15	yes
PARG25895	420.522	-3.35083	0.387245	73.5809	1.05222e-16	2.78102e-15	yes
PARG24688	1307.63	-1.96649	0.223138	73.555	1.06597e-16	2.81287e-15	yes
PARG27437	78.6908	1.87021	0.280334	73.4531	1.12168e-16	2.95519e-15	yes
PARG17496	20.9608	4.19344	0.697185	73.4483	1.12433e-16	2.95747e-15	yes
PARG27288	268.287	2.03843	0.449361	73.4261	1.13692e-16	2.98586e-15	yes
PARG27018	108.061	-4.45839	0.536387	73.4077	1.14739e-16	3.0086e-15	yes
PARG18018	400.855	-1.43688	0.176763	73.3497	1.1812e-16	3.09237e-15	yes
PARG06581	1177.9	2.17881	0.250648	73.3255	1.19557e-16	3.12505e-15	yes
PARG02991	895.706	3.26755	0.365182	73.3189	1.19948e-16	3.13035e-15	yes
PARG01822	47.0954	5.35238	0.642527	73.2774	1.22466e-16	3.19103e-15	yes
PARG26614	3522.37	3.30461	0.357713	73.1724	1.29064e-16	3.35768e-15	yes
PARG12620	266.337	0.914311	0.223363	73.1152	1.32811e-16	3.44976e-15	yes
PARG06079	1408.27	2.54331	0.28181	73.0868	1.34713e-16	3.49369e-15	yes
PARG21151	362.636	1.52364	0.19252	72.9256	1.46015e-16	3.78089e-15	yes
PARG08895	2044.69	3.07939	0.340899	72.9192	1.46486e-16	3.7872e-15	yes
PARG28274	310.96	1.54485	0.277796	72.898	1.48048e-16	3.82162e-15	yes
PARG12438	4136.72	-1.18843	0.142565	72.7939	1.55954e-16	4.01945e-15	yes
PARG04124	13.3783	8.39483	1.34602	72.6401	1.68427e-16	4.33418e-15	yes
PARG07752	527.542	-2.11984	0.255413	72.609	1.71063e-16	4.39522e-15	yes
PARG07265	2017.49	-1.14018	0.173703	72.5792	1.73628e-16	4.44735e-15	yes
PARG13254	170.973	2.25507	0.326906	72.58	1.73565e-16	4.44735e-15	yes
PARG19514	1368.17	1.40022	0.171649	72.4667	1.83675e-16	4.69745e-15	yes
PARG13956	1552.34	-0.679819	0.138299	72.4422	1.8594e-16	4.74076e-15	yes
PARG18594	895.778	1.51457	0.189251	72.4427	1.85891e-16	4.74076e-15	yes
PARG13883	523.333	1.42946	0.297167	72.2481	2.04895e-16	5.21602e-15	yes
PARG04468	273.006	4.2242	0.70818	72.2268	2.07088e-16	5.26377e-15	yes
PARG00529	630.547	3.95128	0.418381	72.2044	2.09415e-16	5.31479e-15	yes
PARG06899	1748.92	5.95108	0.655028	72.1983	2.10057e-16	5.32294e-15	yes
PARG00632	764.1	0.341043	0.198286	72.1718	2.12862e-16	5.38581e-15	yes
PARG06380	301.696	1.45818	0.198003	72.0998	2.2066e-16	5.57461e-15	yes
PARG03641	193.943	2.98877	0.410603	72.0439	2.2692e-16	5.72405e-15	yes
PARG24333	969.679	1.36784	0.246131	71.9746	2.34913e-16	5.91667e-15	yes
PARG22868	17.7569	4.51714	0.761186	71.9703	2.35422e-16	5.92052e-15	yes
PARG26075	258.715	-1.0421	0.160516	71.8955	2.44396e-16	6.13689e-15	yes
PARG05012	336.963	-0.59365	0.131769	71.8125	2.54746e-16	6.38713e-15
PARG06233	16.8667	7.87247	1.3971	71.773	2.59825e-16	6.50463e-15	yes
PARG02167	5567.68	1.55822	0.285153	71.759	2.61661e-16	6.53091e-15	yes
PARG06991	7914.78	-0.663488	0.116984	71.7613	2.61357e-16	6.53091e-15
PARG02518	708.583	-1.03852	0.162431	71.6183	2.80721e-16	6.99611e-15	yes
PARG21807	2831.42	3.8399	0.411876	71.572	2.87301e-16	7.14937e-15	yes
PARG21468	16.2994	2.69557	0.56103	71.5545	2.89829e-16	7.1907e-15	yes
PARG23118	665.518	1.1439	0.245938	71.5556	2.89663e-16	7.1907e-15	yes
PARG02747	814.262	1.01635	0.190062	71.5164	2.95398e-16	7.31794e-15	yes
PARG12619	336.619	0.943191	0.227196	71.465	3.03084e-16	7.49716e-15	yes
PARG21513	2387.98	-1.96796	0.281281	71.4259	3.09074e-16	7.63393e-15	yes
PARG19246	1183.88	-0.847049	0.111752	71.3952	3.13859e-16	7.74062e-15
PARG19480	296.319	1.93052	0.227067	71.3756	3.16948e-16	7.80521e-15	yes
PARG07912	288.739	-1.30153	0.166845	71.3332	3.2373e-16	7.96039e-15	yes
PARG15309	1099.39	1.18507	0.249076	71.3227	3.25444e-16	7.99071e-15	yes
PARG12520	2412.7	3.85516	0.417682	71.211	3.4413e-16	8.43703e-15	yes
PARG23480	366.781	-3.13395	0.407015	71.201	3.45862e-16	8.46699e-15	yes
PARG04376	356.61	-0.99834	0.130488	71.1275	3.58806e-16	8.77093e-15	yes
PARG26854	463.936	-0.85802	0.126304	71.0713	3.69027e-16	9.00751e-15
PARG03109	822.296	-1.16034	0.241318	70.9769	3.86872e-16	9.42922e-15	yes
PARG20341	453.963	0.0163509	0.176127	70.9719	3.87827e-16	9.43865e-15	yes
PARG00948	213.716	1.20647	0.305919	70.955	3.91121e-16	9.50487e-15	yes
PARG26390	480.177	-0.973817	0.117154	70.9034	4.01346e-16	9.7391e-15
PARG22776	171.253	1.65864	0.353719	70.8517	4.11869e-16	9.97986e-15	yes
PARG15679	134.796	3.14778	0.589834	70.772	4.286e-16	1.03701e-14	yes
PARG11871	400.985	1.59879	0.200232	70.7665	4.29784e-16	1.03836e-14	yes
PARG21168	4895.01	3.41194	0.377397	70.7305	4.37592e-16	1.05569e-14	yes
PARG25589	359.139	0.933131	0.150695	70.7076	4.42633e-16	1.0663e-14	yes
PARG16923	354.444	-2.18681	0.255271	70.5223	4.85604e-16	1.16812e-14	yes
PARG06897	1836.09	2.57914	0.290672	70.5043	4.89991e-16	1.17697e-14	yes
PARG24891	770.568	0.586761	0.121014	70.4981	4.91499e-16	1.17889e-14
PARG06749	237.932	1.28076	0.189511	70.4835	4.95112e-16	1.18584e-14	yes
PARG06965	706.586	-1.43475	0.18136	70.4507	5.03295e-16	1.2037e-14	yes
PARG25205	321.167	-0.873381	0.133399	70.4203	5.10998e-16	1.22037e-14	yes
PARG23596	394.999	-3.31808	0.474858	70.4148	5.12409e-16	1.22198e-14	yes
PARG02509	58.0207	5.27247	0.809889	70.3939	5.17791e-16	1.23304e-14	yes
PARG11998	198.012	3.79478	0.62527	70.3335	5.3368e-16	1.26906e-14	yes
PARG11831	505.888	-2.29378	0.271488	70.2855	5.46646e-16	1.29803e-14	yes
PARG07062	942.167	2.74663	0.399323	70.1836	5.75207e-16	1.3639e-14	yes
PARG13518	111.109	0.458857	0.3192	70.1515	5.84507e-16	1.38397e-14	yes
PARG03768	540.512	-1.71657	0.214627	70.1333	5.89871e-16	1.39468e-14	yes
PARG03418	426.502	-1.51032	0.178569	69.9564	6.44406e-16	1.52146e-14	yes
PARG01266	1139.52	2.11687	0.244705	69.9074	6.6038e-16	1.55696e-14	yes
PARG12757	159.219	-1.30725	0.162421	69.7718	7.06717e-16	1.66384e-14	yes
PARG10016	600.353	-1.02456	0.137041	69.7185	7.25798e-16	1.70634e-14	yes
PARG08592	5927.14	2.16929	0.309239	69.6617	7.46716e-16	1.75056e-14	yes
PARG23842	728.886	-0.943449	0.120351	69.6624	7.46466e-16	1.75056e-14
PARG18195	162.668	4.47208	0.526218	69.6579	7.48151e-16	1.75145e-14	yes
PARG17958	105.253	3.05719	0.528726	69.6125	7.65301e-16	1.78908e-14	yes
PARG15122	642.117	-0.692884	0.124433	69.4876	8.14632e-16	1.90173e-14
PARG24159	100.47	-1.52745	0.229464	69.3535	8.71119e-16	2.03074e-14	yes
PARG27198	102.604	1.76911	0.298632	69.3161	8.87543e-16	2.06612e-14	yes
PARG19506	638.784	2.69363	0.318811	69.1958	9.42588e-16	2.19119e-14	yes
PARG10669	3878.91	2.00257	0.297223	69.1884	9.46071e-16	2.19621e-14	yes
PARG12368	50.3594	5.83099	0.797405	69.1282	9.74972e-16	2.26014e-14	yes
PARG24646	1137.77	0.91835	0.120411	69.0211	1.02864e-15	2.38122e-14
PARG27642	453.406	-0.565499	0.218201	68.9148	1.08477e-15	2.50765e-14	yes
PARG00663	2597.12	1.58663	0.196575	68.8609	1.11443e-15	2.57265e-14	yes
PARG08246	462.012	1.1883	0.22632	68.7889	1.15525e-15	2.66318e-14	yes
PARG12332	22.1425	3.0363	0.4193	68.7324	1.18839e-15	2.73577e-14	yes
PARG29469	2870.76	4.00881	0.430924	68.666	1.22845e-15	2.82407e-14	yes
PARG14234	3170.63	3.22617	0.44926	68.6171	1.25891e-15	2.8901e-14	yes
PARG21111	744.927	-1.26415	0.157799	68.5664	1.29122e-15	2.96016e-14	yes
PARG08636	376.767	3.2878	0.376214	68.5534	1.2996e-15	2.97119e-14	yes
PARG24275	186.28	1.40653	0.16962	68.5559	1.29797e-15	2.97119e-14	yes
PARG01889	335.837	-1.02407	0.126344	68.5474	1.30354e-15	2.9761e-14	yes
PARG12746	83.6383	2.24574	0.392064	68.4842	1.3454e-15	3.06744e-14	yes
PARG07303	50.0153	2.04949	0.391133	68.373	1.42228e-15	3.23826e-14	yes
PARG02258	363.598	-0.966187	0.117573	68.3475	1.44052e-15	3.2753e-14
PARG21216	284.54	3.13625	0.477875	68.1555	1.58571e-15	3.6005e-14	yes
PARG17720	901.727	1.38206	0.165257	68.1315	1.60486e-15	3.63404e-14	yes
PARG27403	284.011	3.45997	0.610589	68.1339	1.6029e-15	3.63404e-14	yes
PARG07114	1231.97	1.41084	0.199729	68.057	1.66577e-15	3.76682e-14	yes
PARG26923	1618.05	1.70667	0.230246	67.9693	1.74041e-15	3.93025e-14	yes
PARG16202	622.749	-0.881759	0.230723	67.8866	1.81389e-15	4.09061e-14	yes
PARG12448	300.012	1.39352	0.260904	67.8704	1.82864e-15	4.11828e-14	yes
PARG04417	53.6188	0.938672	0.214037	67.8593	1.83879e-15	4.13553e-14	yes
PARG21234	318.408	4.36644	0.60701	67.8484	1.84885e-15	4.15254e-14	yes
PARG14093	2156.41	15.9417	2.02589	67.8401	1.85652e-15	4.16412e-14	yes
PARG12914	327.616	-1.60308	0.198133	67.8311	1.86489e-15	4.17726e-14	yes
PARG27591	525.029	-0.721871	0.114642	67.813	1.88193e-15	4.20973e-14
PARG23239	458.077	0.679438	0.160749	67.6884	2.00282e-15	4.47412e-14	yes
PARG08835	224.287	-1.14578	0.22097	67.6326	2.05954e-15	4.59466e-14	yes
PARG19264	980.072	2.02013	0.295	67.5738	2.121e-15	4.72543e-14	yes
PARG08795	675.929	-0.569211	0.123907	67.5265	2.17175e-15	4.83201e-14
PARG15557	46.1367	0.982153	0.316823	67.466	2.23839e-15	4.9736e-14	yes
PARG02005	199.713	2.08258	0.408124	67.4588	2.24649e-15	4.98493e-14	yes
PARG01666	118.833	-1.48253	0.231928	67.4401	2.26765e-15	5.02517e-14	yes
PARG13202	588.607	1.41549	0.169938	67.4018	2.31145e-15	5.11538e-14	yes
PARG09195	319.782	-1.01824	0.169292	67.376	2.34149e-15	5.17497e-14	yes
PARG20142	233.373	-1.6041	0.1983	67.3473	2.37535e-15	5.24283e-14	yes
PARG18532	64.5466	2.85522	0.466042	67.3381	2.38625e-15	5.25988e-14	yes
PARG12453	1371.7	1.42975	0.183274	67.2627	2.47788e-15	5.45462e-14	yes
PARG24522	230.995	1.5874	0.253938	67.2582	2.48356e-15	5.45989e-14	yes
PARG27732	1193.24	-0.579327	0.18275	67.2535	2.48934e-15	5.46536e-14	yes
PARG03643	21.9129	2.53209	0.543413	67.2294	2.51948e-15	5.52421e-14	yes
PARG27865	288.175	2.06654	0.259138	67.1033	2.68352e-15	5.87612e-14	yes
PARG06661	5638.87	1.83663	0.231296	67.0157	2.80369e-15	6.13118e-14	yes
PARG00650	101.964	2.83286	0.543519	66.9971	2.8298e-15	6.18014e-14	yes
PARG27558	223.478	-2.77288	0.330968	66.9662	2.87391e-15	6.26823e-14	yes
PARG00414	558.256	0.99571	0.138456	66.9224	2.93754e-15	6.3986e-14
PARG02894	6319.69	2.50143	0.290901	66.8368	3.06593e-15	6.66793e-14	yes
PARG09023	76.0608	-3.05433	0.522024	66.8347	3.06922e-15	6.66793e-14	yes
PARG27935	224.329	1.52319	0.218984	66.8095	3.10813e-15	6.74362e-14	yes
PARG15407	450.587	1.8337	0.297571	66.7877	3.14222e-15	6.80868e-14	yes
PARG24392	349.625	1.27298	0.172869	66.6468	3.37151e-15	7.296e-14	yes
PARG19653	539.987	1.33059	0.232584	66.2779	4.0544e-15	8.76237e-14	yes
PARG21064	1029.48	2.98219	0.413399	66.2516	4.10807e-15	8.8668e-14	yes
PARG07980	521.959	-0.739763	0.139797	66.1598	4.30109e-15	9.27136e-14	yes
PARG06860	653.456	2.65657	0.416956	66.0939	4.4451e-15	9.56937e-14	yes
PARG07352	217.72	4.16187	0.565241	66.0524	4.53834e-15	9.75743e-14	yes
PARG16121	274.597	0.348475	0.285231	66.0426	4.56067e-15	9.79275e-14	yes
PARG23723	134.98	2.66814	0.358928	65.9614	4.74975e-15	1.01856e-13	yes
PARG14044	1979.39	0.759736	0.0954702	65.8907	4.92051e-15	1.05381e-13
PARG29721	516.624	-2.36863	0.291427	65.8808	4.94508e-15	1.05771e-13	yes
PARG00604	26.0503	4.04551	0.720335	65.8255	5.08359e-15	1.08594e-13	yes
PARG03594	253.459	-0.992784	0.129043	65.8152	5.10978e-15	1.09013e-13
PARG10390	146.327	-4.06347	0.507085	65.7907	5.17287e-15	1.10217e-13	yes
PARG10619	89.7477	2.55853	0.429423	65.7822	5.195e-15	1.10547e-13	yes
PARG28150	249.536	1.22423	0.184066	65.6965	5.42241e-15	1.15238e-13	yes
PARG04442	148.533	3.69015	0.599061	65.6208	5.63139e-15	1.19527e-13	yes
PARG17541	514.521	-1.02484	0.126977	65.6147	5.64859e-15	1.19739e-13	yes
PARG23489	1948.76	-0.583726	0.100534	65.5094	5.95395e-15	1.26051e-13
PARG15663	511.179	-1.77345	0.231396	65.4694	6.07425e-15	1.28434e-13	yes
PARG17902	905.272	3.11887	0.395634	65.423	6.21683e-15	1.31281e-13	yes
PARG19103	166.385	2.45224	0.410408	65.4094	6.25944e-15	1.32013e-13	yes
PARG19683	1985.6	0.883206	0.130873	65.377	6.36164e-15	1.33998e-13
PARG29249	18.1934	3.80744	0.734625	65.3633	6.4053e-15	1.34747e-13	yes
PARG09215	333.677	-1.11353	0.141803	65.2062	6.92868e-15	1.45572e-13	yes
PARG02506	1495.89	-0.769251	0.164603	65.1741	7.04066e-15	1.47738e-13	yes
PARG20629	402.199	1.74423	0.212545	65.1674	7.06451e-15	1.48051e-13	yes
PARG12710	1425.72	4.48299	0.483241	65.1644	7.07516e-15	1.48088e-13	yes
PARG00513	71.8532	4.76124	0.796052	65.1547	7.10948e-15	1.48619e-13	yes
PARG22201	370.063	3.35153	0.510525	65.1393	7.16454e-15	1.49581e-13	yes
PARG19839	395.917	2.52673	0.306028	65.1321	7.19025e-15	1.49929e-13	yes
PARG27668	2902.42	2.25978	0.283177	65.1022	7.29851e-15	1.51996e-13	yes
PARG03133	54.549	3.78977	0.706391	64.9915	7.71375e-15	1.60442e-13	yes
PARG01894	54.5497	2.24032	0.404398	64.9331	7.94233e-15	1.64826e-13	yes
PARG23510	33.5233	1.30705	0.287529	64.9326	7.94437e-15	1.64826e-13	yes
PARG14178	1257.24	3.1715	0.444015	64.8704	8.19533e-15	1.6982e-13	yes
PARG20570	578.699	0.848846	0.273483	64.8586	8.24407e-15	1.70617e-13	yes
PARG00030	876.042	0.20958	0.121022	64.8271	8.37494e-15	1.7311e-13
PARG02134	207.927	4.62096	0.635811	64.7119	8.8715e-15	1.83146e-13	yes
PARG11518	778.327	-1.0274	0.137902	64.5346	9.69359e-15	1.99869e-13	yes
PARG01957	445.916	0.77572	0.0968111	64.5302	9.7152e-15	2.00066e-13
PARG11134	216.673	5.78799	0.889768	64.5185	9.77198e-15	2.00985e-13	yes
PARG07998	459.694	2.08939	0.275746	64.4595	1.00646e-14	2.06748e-13	yes
PARG27284	235.654	2.34639	0.364793	64.3467	1.06485e-14	2.18472e-13	yes
PARG29221	1010.26	0.90546	0.170854	64.3327	1.07231e-14	2.19732e-13	yes
PARG06326	54.1639	1.08209	0.290652	64.2653	1.10911e-14	2.26991e-13	yes
PARG02925	1267.65	2.02238	0.246474	64.2434	1.12129e-14	2.29202e-13	yes
PARG12609	8751.59	2.9114	0.354458	64.2366	1.1251e-14	2.29698e-13	yes
PARG26416	4521.6	1.96192	0.401809	64.1451	1.17781e-14	2.40164e-13	yes
PARG20915	307.791	-0.951906	0.150911	64.0103	1.25991e-14	2.56589e-13	yes
PARG25148	1607.2	-0.798997	0.103248	63.9231	1.31608e-14	2.677e-13
PARG27385	2976.15	3.52283	0.404433	63.8478	1.36653e-14	2.77621e-13	yes
PARG07783	767.21	1.19586	0.233182	63.8441	1.36908e-14	2.778e-13	yes
PARG18893	706.948	0.971601	0.154484	63.8271	1.38074e-14	2.79824e-13
PARG23243	3983.51	-0.280007	0.0891853	63.776	1.41647e-14	2.86715e-13
PARG03640	539.669	-0.529083	0.139294	63.6903	1.47849e-14	2.98903e-13
PARG16298	6835.68	1.27929	0.242689	63.6847	1.48267e-14	2.99384e-13	yes
PARG13934	694.661	-0.924861	0.206941	63.6666	1.49611e-14	3.01731e-13	yes
PARG14185	1812.42	2.01518	0.293116	63.4589	1.65991e-14	3.34359e-13	yes
PARG13341	450.922	-0.888648	0.168106	63.4516	1.66595e-14	3.3517e-13	yes
PARG22812	892.337	2.68541	0.550036	63.4006	1.70898e-14	3.4341e-13	yes
PARG15664	1642.4	1.10678	0.224613	63.3484	1.75419e-14	3.52069e-13	yes
PARG00555	1610.48	1.40061	0.343053	63.3085	1.78953e-14	3.58728e-13	yes
PARG00013	155.054	-1.2611	0.23207	63.2603	1.83313e-14	3.67025e-13	yes
PARG23134	26.639	0.858719	1.0182	63.1096	1.97667e-14	3.95286e-13	yes
PARG03465	227.611	2.95114	0.356166	63.0321	2.05472e-14	4.10401e-13	yes
PARG02686	6021.87	-0.887581	0.172424	62.9133	2.18042e-14	4.34983e-13	yes
PARG19320	978.056	-0.835999	0.12109	62.9027	2.19207e-14	4.36782e-13
PARG11546	900.143	0.466152	0.149407	62.898	2.19719e-14	4.37278e-13	yes
PARG24058	567.075	-0.573686	0.107778	62.8841	2.21251e-14	4.39799e-13
PARG29547	434.385	-1.77531	0.440396	62.88	2.21705e-14	4.40175e-13	yes
PARG08918	317.034	-1.20961	0.15888	62.7841	2.32598e-14	4.61251e-13	yes
PARG06746	408.181	7.54587	0.77403	62.7757	2.3358e-14	4.62645e-13	yes
PARG07232	9.44092	3.13561	0.71122	62.7315	2.38794e-14	4.72408e-13	yes
PARG08274	1135.61	1.26052	0.162384	62.7066	2.41786e-14	4.77758e-13	yes
PARG06321	767.612	1.41044	0.176993	62.6856	2.44335e-14	4.8222e-13	yes
PARG21476	13.4305	2.94341	0.591997	62.6594	2.47557e-14	4.88e-13	yes
PARG24016	385.073	-0.276161	0.134537	62.6388	2.50129e-14	4.92483e-13
PARG13679	108.357	-1.16509	0.310592	62.5244	2.64853e-14	5.20857e-13	yes
PARG27503	407.741	-1.41823	0.186737	62.474	2.7161e-14	5.33514e-13	yes
PARG07905	1020.58	2.23085	0.341279	62.3321	2.91584e-14	5.72071e-13	yes
PARG10709	981.402	1.14446	0.20984	62.1707	3.16083e-14	6.19404e-13	yes
PARG19797	342.864	-1.05194	0.155135	62.0571	3.34562e-14	6.54842e-13	yes
PARG08408	339.474	1.4378	0.180371	61.9942	3.45243e-14	6.74953e-13	yes
PARG08231	88.6857	3.39402	0.605831	61.9616	3.50929e-14	6.85261e-13	yes
PARG12792	1593.87	0.755516	0.406169	61.8858	3.64474e-14	7.10875e-13	yes
PARG08562	68.1443	-2.83556	0.432581	61.8346	3.73924e-14	7.2845e-13	yes
PARG21106	43.855	3.00715	0.596618	61.7782	3.84623e-14	7.48415e-13	yes
PARG10081	734.754	1.62459	0.229863	61.7602	3.88091e-14	7.54278e-13	yes
PARG01757	2190.95	1.75331	0.302446	61.6636	4.07309e-14	7.90704e-13	yes
PARG06409	2697.04	-3.06447	0.38917	61.6479	4.10505e-14	7.95977e-13	yes
PARG12963	395.811	0.518125	0.231153	61.6291	4.14395e-14	8.02582e-13	yes
PARG00374	181.458	-1.19745	0.194582	61.622	4.15873e-14	8.04506e-13	yes
PARG27749	789.751	2.85904	0.350203	61.6021	4.20017e-14	8.11577e-13	yes
PARG11997	279.197	2.59092	0.433914	61.5943	4.21656e-14	8.13797e-13	yes
PARG04133	39.0818	4.17858	0.588007	61.553	4.30462e-14	8.29826e-13	yes
PARG01960	1176.3	1.91185	0.243037	61.5359	4.34152e-14	8.35969e-13	yes
PARG18116	17.4598	2.00189	0.415079	61.4627	4.5034e-14	8.66135e-13	yes
PARG05696	267.992	1.92897	0.299045	61.4326	4.57176e-14	8.77249e-13	yes
PARG05720	722.487	-1.83544	0.231539	61.4329	4.57109e-14	8.77249e-13	yes
PARG26450	208.925	-2.03005	0.256179	61.4005	4.64571e-14	8.9041e-13	yes
PARG27040	294.542	-1.56797	0.202246	61.3732	4.70949e-14	9.01593e-13	yes
PARG08481	1028.4	-1.88575	0.289854	61.3528	4.75775e-14	9.09783e-13	yes
PARG12486	109.348	1.98268	0.412916	61.2872	4.91645e-14	9.39047e-13	yes
PARG04443	9195.76	0.950007	0.183898	61.242	5.02895e-14	9.59431e-13	yes
PARG16104	3908.73	3.28417	0.457168	61.1055	5.384e-14	1.02599e-12	yes
PARG06917	38.7784	2.92889	0.408749	61.0962	5.40924e-14	1.02962e-12	yes
PARG08571	44.5903	2.11332	0.573542	60.9183	5.91237e-14	1.12409e-12	yes
PARG07553	585.428	-0.55064	0.0998369	60.8277	6.18647e-14	1.17486e-12
PARG27952	2443.82	2.32191	0.304735	60.8138	6.22935e-14	1.18165e-12	yes
PARG15923	210.431	-2.24533	0.281461	60.6946	6.61192e-14	1.25279e-12	yes
PARG24419	1623.44	6.04908	0.637092	60.6732	6.68321e-14	1.26486e-12	yes
PARG03110	973.708	-0.963394	0.208443	60.621	6.86001e-14	1.29684e-12	yes
PARG16019	143.881	5.90065	0.688512	60.5452	7.12489e-14	1.34538e-12	yes
PARG24128	1087.46	-1.09406	0.17977	60.4967	7.29979e-14	1.37684e-12	yes
PARG22619	36.0813	1.69986	0.286417	60.4403	7.50869e-14	1.41463e-12	yes
PARG19969	19.2246	1.58703	0.435672	60.3956	7.67843e-14	1.44497e-12	yes
PARG29589	2744.19	0.745658	0.185388	60.3269	7.94661e-14	1.49375e-12	yes
PARG20222	22.1056	-6.97206	1.28408	60.3105	8.01193e-14	1.50432e-12	yes
PARG12789	118.288	-1.51696	0.207992	60.3009	8.0506e-14	1.50987e-12	yes
PARG22932	1901.86	0.804062	0.180801	60.2729	8.16417e-14	1.52945e-12	yes
PARG24765	78.8014	1.54876	0.353159	60.2084	8.43167e-14	1.57778e-12	yes
PARG19484	567.099	2.28262	0.293162	60.1893	8.51265e-14	1.59114e-12	yes
PARG18672	70.3936	-1.84203	0.351826	60.1726	8.58398e-14	1.60267e-12	yes
PARG24156	73.8128	5.61976	0.945312	60.1413	8.71943e-14	1.62612e-12	yes
PARG19136	138.247	3.03813	0.403329	60.0833	8.97566e-14	1.67203e-12	yes
PARG10503	1131.39	1.22994	0.205951	59.956	9.56588e-14	1.77998e-12	yes
PARG24026	31.6672	7.15479	1.12535	59.9522	9.58403e-14	1.78136e-12	yes
PARG26709	1858.25	1.31988	0.167909	59.9441	9.62307e-14	1.78662e-12	yes
PARG26388	402.488	0.94132	0.155402	59.9301	9.69031e-14	1.79709e-12
PARG12209	357.747	0.518384	0.410896	59.9167	9.75555e-14	1.80717e-12	yes
PARG03476	340.989	-0.939168	0.166919	59.8614	1.00291e-13	1.85578e-12	yes
PARG04109	1050.66	-1.05899	0.136093	59.7952	1.03667e-13	1.91569e-12	yes
PARG19260	59.8271	1.33073	0.316284	59.7934	1.0376e-13	1.91569e-12	yes
PARG29212	655.482	3.60708	0.425804	59.7616	1.05424e-13	1.94426e-12	yes
PARG13038	1961.54	3.33154	0.395631	59.6198	1.13168e-13	2.08476e-12	yes
PARG19896	410.417	-1.85128	0.235235	59.5057	1.19814e-13	2.20474e-12	yes
PARG13000	1316.71	2.81556	0.368389	59.486	1.20996e-13	2.22402e-12	yes
PARG28414	270.467	1.07868	0.254274	59.4491	1.23252e-13	2.26299e-12	yes
PARG00510	238.684	3.04569	0.393629	59.4434	1.23604e-13	2.26694e-12	yes
PARG26378	71.2256	1.02401	0.295494	59.3203	1.31452e-13	2.40821e-12	yes
PARG07452	7507.93	2.63743	0.399835	59.2524	1.3599e-13	2.48861e-12	yes
PARG20794	81.4778	-2.58777	0.341992	59.2225	1.38037e-13	2.52328e-12	yes
PARG22346	341.244	1.42536	0.30841	59.2077	1.3906e-13	2.53918e-12	yes
PARG24247	1057.97	2.20247	0.30517	59.1994	1.3964e-13	2.54697e-12	yes
PARG21137	1172.88	1.52371	0.330324	59.1728	1.41513e-13	2.57831e-12	yes
PARG03112	43.0114	2.69636	0.441888	59.0753	1.48578e-13	2.70405e-12	yes
PARG20935	12.9529	2.26332	0.514262	59.0355	1.51565e-13	2.7554e-12	yes
PARG21414	26.9497	2.94512	0.638416	58.9967	1.54535e-13	2.80632e-12	yes
PARG10203	147.361	0.869247	0.155441	58.9484	1.58316e-13	2.87183e-12
PARG27639	968.367	2.77857	0.35479	58.9279	1.59944e-13	2.8982e-12	yes
PARG24405	229.301	2.10547	0.432498	58.745	1.75259e-13	3.17224e-12	yes
PARG06712	718.131	3.99342	0.534141	58.7064	1.78678e-13	3.23061e-12	yes
PARG28418	843.275	2.90904	0.358959	58.7036	1.7893e-13	3.23164e-12	yes
PARG03037	53.6948	1.99488	0.296806	58.6962	1.79588e-13	3.23999e-12	yes
PARG22987	871.264	-0.542553	0.110874	58.6038	1.88084e-13	3.3896e-12
PARG20121	31.9868	-5.28035	0.80505	58.5764	1.9068e-13	3.43265e-12	yes
PARG09217	220.248	1.15027	0.152931	58.5388	1.94296e-13	3.49396e-12	yes
PARG01849	218.676	1.59475	0.228212	58.5317	1.94987e-13	3.50259e-12	yes
PARG06937	147.773	-1.23546	0.166282	58.5267	1.95476e-13	3.50759e-12	yes
PARG27081	445.477	-1.11855	0.152798	58.4888	1.9921e-13	3.57073e-12	yes
PARG23905	769.794	5.3171	0.631061	58.4775	2.00346e-13	3.58721e-12	yes
PARG01116	328.163	-1.13156	0.223169	58.4417	2.0396e-13	3.64798e-12	yes
PARG00509	7354.7	4.28173	0.506919	58.4299	2.05171e-13	3.66569e-12	yes
PARG24064	137.72	-3.01131	0.412203	58.3962	2.08656e-13	3.72394e-12	yes
PARG00282	1207.36	1.54658	0.289942	58.386	2.09716e-13	3.73885e-12	yes
PARG01970	196.097	-2.60577	0.352774	58.3738	2.11009e-13	3.75786e-12	yes
PARG19706	798.209	0.959332	0.318876	58.3622	2.12236e-13	3.77566e-12	yes
PARG25065	101.567	1.20273	0.48235	58.351	2.13426e-13	3.79276e-12	yes
PARG12649	998.443	-1.31777	0.18012	58.2793	2.21216e-13	3.92699e-12	yes
PARG06871	818.636	-0.788181	0.118537	58.2411	2.25477e-13	3.99836e-12
PARG02397	208.309	-1.15828	0.154839	58.1801	2.3246e-13	4.1178e-12	yes
PARG19464	807.818	-0.685891	0.118683	58.159	2.34924e-13	4.157e-12
PARG20243	458.441	0.991519	0.144225	58.1488	2.36127e-13	4.17385e-12
PARG08633	171.76	3.89668	0.57788	58.049	2.48211e-13	4.37812e-12	yes
PARG24497	2176.19	1.68166	0.287816	58.0491	2.48192e-13	4.37812e-12	yes
PARG18670	82.955	-1.75608	0.34565	58.0014	2.54194e-13	4.47889e-12	yes
PARG08689_DAM4	6061.86	-4.26864	0.430702	145.84	2.68091e-13	4.55453e-12	yes
PARG04449	1505.61	1.18772	0.165498	57.8505	2.74109e-13	4.82466e-12	yes
PARG05794	32.0724	3.78853	0.564364	57.8298	2.76965e-13	4.86977e-12	yes
PARG11024	1077.38	0.679792	0.136553	57.8002	2.8109e-13	4.93707e-12
PARG20290	11.1878	3.97507	0.819408	57.7934	2.82047e-13	4.94865e-12	yes
PARG27099	1090.18	4.77043	0.568407	57.7126	2.93678e-13	5.14727e-12	yes
PARG13145	2479.56	-0.778709	0.292438	57.6137	3.08559e-13	5.40239e-12	yes
PARG06386	59.3953	-1.42081	0.299464	57.5601	3.16949e-13	5.54344e-12	yes
PARG13825	36.8567	2.89592	0.473678	57.5312	3.21561e-13	5.61818e-12	yes
PARG06747	55.5931	9.06976	1.38876	57.507	3.25471e-13	5.68051e-12	yes
PARG00136	35.5716	2.49799	0.516518	57.4958	3.27292e-13	5.70629e-12	yes
PARG04143	731.797	3.81231	0.590474	57.3878	3.45467e-13	6.01686e-12	yes
PARG26690	418.394	-1.52686	0.20188	57.2893	3.629e-13	6.31386e-12	yes
PARG29495	374.18	-0.588447	0.114036	57.2204	3.75628e-13	6.52846e-12
PARG12497	51.5556	-3.84468	1.08324	57.1891	3.81553e-13	6.62449e-12	yes
PARG01991	70.8408	-2.43831	0.33209	57.1434	3.9036e-13	6.77032e-12	yes
PARG18238	10.0291	6.13991	1.22417	57.1027	3.98382e-13	6.90224e-12	yes
PARG26540	1080.56	-0.586016	0.13141	57.1005	3.98819e-13	6.90261e-12
PARG14473	942.368	1.70663	0.224222	57.0066	4.17991e-13	7.22689e-12	yes
PARG08290	324.904	-0.824005	0.125995	56.9919	4.21077e-13	7.27267e-12
PARG26379	652.727	-0.609578	0.141701	56.9889	4.21723e-13	7.27625e-12
PARG10693	403.175	-1.36285	0.238218	56.9763	4.24369e-13	7.31431e-12	yes
PARG03416	38.0668	-0.893658	0.352399	56.9646	4.26869e-13	7.34976e-12	yes
PARG04908	1631.95	-1.39616	0.282926	56.9336	4.33534e-13	7.45678e-12	yes
PARG27283	45.1619	3.43193	0.49747	56.8664	4.48355e-13	7.70373e-12	yes
PARG12134	244.491	1.52825	0.244854	56.8627	4.49189e-13	7.71007e-12	yes
PARG03048	72.7328	-3.12105	0.444609	56.8499	4.52061e-13	7.75135e-12	yes
PARG03739	796.219	0.592848	0.0864049	56.7036	4.86365e-13	8.33095e-12
PARG13824	28.4791	3.79422	0.699625	56.6842	4.91125e-13	8.4038e-12	yes
PARG18221	25.1086	3.6617	0.52944	56.6443	5.01014e-13	8.5642e-12	yes
PARG11487	81.8007	-2.5293	0.373146	56.6397	5.02157e-13	8.5749e-12	yes
PARG21314	293.711	0.878294	0.248282	56.6244	5.06024e-13	8.63205e-12	yes
PARG02310	154.238	-1.41317	0.306929	56.6145	5.0854e-13	8.66607e-12	yes
PARG28029	366.614	-1.93651	0.264447	56.5343	5.2935e-13	9.01144e-12	yes
PARG07004	584.109	-1.38775	0.190051	56.5166	5.34054e-13	9.08221e-12	yes
PARG02048	697.97	6.48124	0.712731	56.484	5.42811e-13	9.21224e-12	yes
PARG10470	1846.88	0.937	0.142277	56.4654	5.479e-13	9.28912e-12
PARG12811	531.225	-0.622614	0.135983	56.4603	5.49283e-13	9.30306e-12
PARG14746	166.077	1.83305	0.32162	56.4008	5.65866e-13	9.55468e-12	yes
PARG20408	1661.68	-0.40578	0.154831	56.4018	5.65606e-13	9.55468e-12
PARG25596	1627.67	2.02157	0.313286	56.4028	5.6531e-13	9.55468e-12	yes
PARG12717	843.386	0.885043	0.129692	56.3973	5.66867e-13	9.56185e-12
PARG06568	54.2332	-1.52219	0.314655	56.3486	5.80829e-13	9.78741e-12	yes
PARG15318	189.988	2.02177	0.407294	56.3404	5.83214e-13	9.81763e-12	yes
PARG27943	257.689	-1.35219	0.302713	56.318	5.89806e-13	9.91855e-12	yes
PARG29797	405.678	6.29482	0.711144	56.2614	6.06728e-13	1.01928e-11	yes
PARG11909	28.9255	2.74571	0.405281	56.2418	6.12698e-13	1.02827e-11	yes
PARG03546	24.8811	3.88684	0.732643	56.2384	6.13748e-13	1.02899e-11	yes
PARG02620	222.679	0.956028	0.204376	56.2278	6.17008e-13	1.03237e-11	yes
PARG16174	3519.55	3.33565	0.413605	56.2282	6.16873e-13	1.03237e-11	yes
PARG08539	676.636	4.96168	0.70733	56.1393	6.44922e-13	1.07799e-11	yes
PARG21814	273.669	4.79921	0.562885	56.1068	6.55481e-13	1.09453e-11	yes
PARG15792	230.744	3.80438	0.46682	56.0644	6.6953e-13	1.11687e-11	yes
PARG11101	386.168	-1.09506	0.188973	56.0433	6.76616e-13	1.12756e-11	yes
PARG27969	212.586	4.61779	0.735559	56.0155	6.86111e-13	1.14223e-11	yes
PARG14393	415.249	-0.794744	0.144206	55.9895	6.95083e-13	1.15601e-11
PARG00413	2410.87	1.06715	0.142401	55.9871	6.95909e-13	1.15623e-11	yes
PARG06269	557.687	1.3558	0.26632	55.9362	7.13854e-13	1.18486e-11	yes
PARG20646	123.831	4.17304	0.793914	55.891	7.30168e-13	1.21072e-11	yes
PARG14381	61.7575	0.12492	0.334805	55.8161	7.58027e-13	1.25566e-11	yes
PARG02044	290.179	1.41087	0.195967	55.8121	7.59545e-13	1.25692e-11	yes
PARG20490	435.76	1.02303	0.293546	55.7646	7.77796e-13	1.28584e-11	yes
PARG06931	11.4298	2.5582	0.676903	55.733	7.90183e-13	1.30502e-11	yes
PARG15720	102.242	2.62559	0.604094	55.6923	8.06417e-13	1.33051e-11	yes
PARG03124	65.5653	4.72238	0.609355	55.6534	8.22264e-13	1.35531e-11	yes
PARG19086	47.8748	3.14576	0.422757	55.6009	8.44158e-13	1.39001e-11	yes
PARG25925	24.5705	-0.360795	0.431654	55.5941	8.47018e-13	1.39334e-11	yes
PARG23844	554.831	-0.757257	0.126899	55.5691	8.57686e-13	1.40949e-11
PARG10811	77.1304	1.91881	0.315016	55.5167	8.80431e-13	1.44544e-11	yes
PARG19283	1184.06	-0.485486	0.144082	55.5106	8.83135e-13	1.44845e-11
PARG00125	611.946	1.19101	0.197286	55.4603	9.05636e-13	1.48388e-11	yes
PARG10672	374.865	-1.29632	0.182247	55.4004	9.33167e-13	1.52749e-11	yes
PARG07278	1421.84	4.48959	0.832825	55.3943	9.35989e-13	1.5306e-11	yes
PARG23193	202.474	-1.30486	0.177612	55.3503	9.5682e-13	1.56312e-11	yes
PARG16850	1538.42	-1.39107	0.204247	55.2974	9.82492e-13	1.60348e-11	yes
PARG21283	20.0767	4.13982	0.613188	55.2821	9.90012e-13	1.61417e-11	yes
PARG16669	32.1063	-1.35881	0.416236	55.2679	9.97079e-13	1.62409e-11	yes
PARG24626	699.828	0.252657	0.144444	55.244	1.00908e-12	1.64203e-11
PARG11217	885.85	-1.61317	0.250447	55.2223	1.02007e-12	1.65829e-11	yes
PARG21984	452.003	0.957921	0.427891	55.2084	1.02721e-12	1.66826e-11	yes
PARG23910	181.324	4.24785	0.516615	55.159	1.05287e-12	1.70826e-11	yes
PARG06405	444.883	-0.64658	0.102737	55.1567	1.05409e-12	1.70857e-11
PARG07400	32.7026	-1.918	0.446612	55.1226	1.07222e-12	1.73626e-11	yes
PARG08028	970.173	0.581399	0.257854	55.085	1.09255e-12	1.76746e-11	yes
PARG23963	305.434	-0.658194	0.213964	55.0642	1.10396e-12	1.78418e-11	yes
PARG01108	468.841	-1.01433	0.136076	55.049	1.11241e-12	1.79608e-11	yes
PARG20196	1821.25	-1.16028	0.24876	55.0406	1.11709e-12	1.80189e-11	yes
PARG07173	19.9484	2.71531	0.457559	54.9935	1.14372e-12	1.84306e-11	yes
PARG28605	310.968	2.20586	0.300933	54.9701	1.15719e-12	1.86295e-11	yes
PARG27050	700.543	-0.3706	0.197608	54.8935	1.20235e-12	1.93378e-11	yes
PARG02036	402.417	-2.07903	0.273235	54.8641	1.22017e-12	1.96055e-11	yes
PARG04962	450.473	3.20042	0.499019	54.7709	1.27833e-12	2.052e-11	yes
PARG06789	396.183	-1.55206	0.22712	54.7175	1.31293e-12	2.1055e-11	yes
PARG02095	644.231	4.09846	0.652178	54.6922	1.32968e-12	2.12826e-11	yes
PARG05725	229.587	-1.87468	0.25223	54.6939	1.32856e-12	2.12826e-11	yes
PARG11685	194.499	-0.620683	0.156362	54.6396	1.36512e-12	2.18288e-11	yes
PARG29576	233.251	1.4614	0.198231	54.6023	1.39076e-12	2.22174e-11	yes
PARG07301	518.817	0.65171	0.166394	54.5888	1.40021e-12	2.23468e-11	yes
PARG19591	661.092	1.22397	0.165988	54.5567	1.42289e-12	2.26581e-11	yes
PARG22774	526.584	-1.83132	0.254956	54.5562	1.42322e-12	2.26581e-11	yes
PARG25287	2097.57	2.47578	0.330927	54.5554	1.42381e-12	2.26581e-11	yes
PARG24212	2331.48	1.09314	0.203557	54.5247	1.4458e-12	2.29859e-11	yes
PARG21326	454.933	0.0911112	0.188438	54.4904	1.47079e-12	2.3361e-11	yes
PARG11153	744.077	0.756017	0.10609	54.4497	1.50109e-12	2.38194e-11
PARG04437	351.884	0.875195	0.1446	54.4185	1.52462e-12	2.41697e-11
PARG11410	121.513	1.42705	0.257536	54.3889	1.54737e-12	2.45069e-11	yes
PARG11547	18.8091	4.50593	0.683477	54.3261	1.59676e-12	2.52651e-11	yes
PARG10999	136.117	0.450724	0.408056	54.3237	1.59869e-12	2.52714e-11	yes
PARG27725	1811.8	5.35378	0.778362	54.2541	1.65526e-12	2.61409e-11	yes
PARG00528	882.957	0.680801	0.100334	54.2503	1.65844e-12	2.61661e-11
PARG02984	63.8858	1.24567	0.37586	54.2247	1.67979e-12	2.64779e-11	yes
PARG26873	531.741	1.56186	0.219045	54.2137	1.68908e-12	2.6599e-11	yes
PARG04601	288.679	3.27627	0.425245	54.195	1.70488e-12	2.68224e-11	yes
PARG10430	676.333	-0.757176	0.104269	54.1699	1.72645e-12	2.71242e-11
PARG15259	219.144	3.89348	0.798046	54.1689	1.72733e-12	2.71242e-11	yes
PARG00916	255.904	2.66262	0.348734	54.148	1.74544e-12	2.73827e-11	yes
PARG10668	95.0733	5.47687	0.906945	54.1182	1.77167e-12	2.77678e-11	yes
PARG11254	90.2005	2.14279	0.402794	54.1009	1.78707e-12	2.79828e-11	yes
PARG28194	1386.21	0.812629	0.158494	54.0498	1.83334e-12	2.86803e-11
PARG01796	55.6161	-2.54475	0.365951	54.0325	1.8492e-12	2.89012e-11	yes
PARG24515	260.462	11.9255	1.90298	53.9807	1.89771e-12	2.96314e-11	yes
PARG19247	463.437	1.71101	0.240847	53.9293	1.94712e-12	3.03743e-11	yes
PARG11029	349.08	-4.07774	0.520688	53.9237	1.95261e-12	3.04313e-11	yes
PARG15337	14.1418	6.06487	1.13878	53.9215	1.95475e-12	3.04361e-11	yes
PARG11295	375.665	-0.862624	0.122623	53.9107	1.96534e-12	3.05724e-11
PARG23133	590.09	1.62716	0.494233	53.8839	1.99189e-12	3.09564e-11	yes
PARG11638	170.907	1.00297	0.178037	53.8347	2.04146e-12	3.1697e-11	yes
PARG12550	182.445	1.54785	0.341547	53.8054	2.07156e-12	3.21066e-11	yes
PARG24227	494.337	1.10734	0.150226	53.8053	2.07171e-12	3.21066e-11	yes
PARG02716	126.8	-2.88065	0.387721	53.7287	2.15255e-12	3.33284e-11	yes
PARG02467	74.6443	1.01762	0.336116	53.6903	2.19436e-12	3.3944e-11	yes
PARG02171	266.666	1.29528	0.176459	53.6349	2.25594e-12	3.48642e-11	yes
PARG27825	25.3956	2.34467	0.445773	53.6239	2.26842e-12	3.50244e-11	yes
PARG18074	1607.33	1.29844	0.310221	53.5942	2.30228e-12	3.55141e-11	yes
PARG09725	974.731	0.854335	0.151954	53.5734	2.32639e-12	3.58528e-11
PARG06849	420.527	0.331642	0.246651	53.5601	2.34195e-12	3.6059e-11	yes
PARG19988	618.011	2.55328	0.463246	53.4888	2.42686e-12	3.73319e-11	yes
PARG10987	18.1183	2.08312	0.4398	53.4534	2.4703e-12	3.79648e-11	yes
PARG05775	3269.15	-0.359705	0.141245	53.4444	2.48143e-12	3.81006e-11
PARG08333	1047.38	0.542935	0.253794	53.4197	2.51218e-12	3.85372e-11	yes
PARG12571	386.648	1.02754	0.161057	53.3218	2.6383e-12	4.04344e-11	yes
PARG07672	279.15	4.76636	0.615007	53.3033	2.66277e-12	4.07718e-11	yes
PARG23934	1608.17	4.07807	0.49493	53.2067	2.79459e-12	4.27508e-11	yes
PARG04148	43.4285	3.19184	0.604018	53.1955	2.81019e-12	4.29499e-11	yes
PARG17415	950.789	7.24537	0.786671	53.1592	2.86167e-12	4.36964e-11	yes
PARG23921	785.536	3.62858	0.546734	53.1433	2.88453e-12	4.4005e-11	yes
PARG03787	353.667	-1.51979	0.22623	53.0898	2.96279e-12	4.51574e-11	yes
PARG23935	623.573	3.92422	0.482786	53.0771	2.98164e-12	4.5403e-11	yes
PARG18006	1378.11	3.18179	0.409772	53.0013	3.09674e-12	4.71125e-11	yes
PARG06802	597.208	2.57745	0.471617	52.9629	3.15682e-12	4.79825e-11	yes
PARG20679	24.8667	-3.19764	0.499843	52.8609	3.32195e-12	5.04463e-11	yes
PARG00138	26.4392	2.63914	0.56805	52.8533	3.33473e-12	5.0594e-11	yes
PARG03586	260.696	1.102	0.182572	52.81	3.40758e-12	5.1652e-11	yes
PARG14132	111.113	1.27913	0.289944	52.7305	3.54581e-12	5.36983e-11	yes
PARG00223	494.145	13.808	1.94345	52.7146	3.57412e-12	5.40777e-11	yes
PARG27721	598.211	-0.962253	0.136463	52.6793	3.6377e-12	5.49896e-11
PARG05209	213.179	-0.762202	0.129107	52.6589	3.67507e-12	5.54801e-11
PARG26656	89.3125	-1.75967	0.438136	52.6579	3.67683e-12	5.54801e-11	yes
PARG16555	1441.9	-0.642771	0.107654	52.5327	3.91442e-12	5.90114e-11
PARG14045	4088.63	3.89477	0.479349	52.4974	3.98422e-12	6.00092e-11	yes
PARG03663	146.578	3.68617	0.50892	52.4895	3.9999e-12	6.01908e-11	yes
PARG13492	73.2182	2.00901	0.444235	52.4814	4.01613e-12	6.03802e-11	yes
PARG16494	369.859	1.23	0.292574	52.4778	4.02344e-12	6.04353e-11	yes
PARG02053	1092.29	-0.127718	0.126178	52.4682	4.0427e-12	6.0615e-11
PARG12478	602.34	-0.634161	0.17082	52.4683	4.04247e-12	6.0615e-11	yes
PARG01378	27.6112	0.83967	0.431448	52.4104	4.16126e-12	6.23362e-11	yes
PARG21282	1982.69	5.32924	0.617248	52.4082	4.16586e-12	6.23489e-11	yes
PARG23338	159.712	0.82462	0.222951	52.3526	4.28335e-12	6.40496e-11	yes
PARG27734	298.403	-1.22458	0.179477	52.3046	4.38737e-12	6.5546e-11	yes
PARG00092	350.44	-0.759366	0.123053	52.2753	4.45199e-12	6.63919e-11
PARG12640	443.391	-1.20719	0.191682	52.2762	4.4501e-12	6.63919e-11	yes
PARG26490	199.923	0.169581	0.311676	52.2601	4.48614e-12	6.6841e-11	yes
PARG10995	219.478	1.41338	0.239175	52.2167	4.58454e-12	6.82459e-11	yes
PARG06027	263.444	1.98649	0.267552	52.1967	4.63063e-12	6.88702e-11	yes
PARG19292	275.359	1.55628	0.265007	52.1904	4.64507e-12	6.90231e-11	yes
PARG25919	1519.27	-0.601656	0.0877456	52.1753	4.68028e-12	6.94841e-11
PARG02315	124.64	-2.30594	0.34006	52.129	4.78985e-12	7.10472e-11	yes
PARG19654	457.757	1.85969	0.25368	52.1203	4.81084e-12	7.12949e-11	yes
PARG24709	2179.58	2.67626	0.349044	52.1142	4.82542e-12	7.14472e-11	yes
PARG24973	2907.34	-1.58366	0.219959	52.0869	4.89196e-12	7.23679e-11	yes
PARG23334	164.989	-1.15312	0.188094	52.0612	4.95509e-12	7.32365e-11	yes
PARG24979	180.935	-1.10496	0.172631	51.985	5.14764e-12	7.60147e-11	yes
PARG02978	395.324	1.028	0.159381	51.9114	5.34055e-12	7.87933e-11	yes
PARG07749	12676.5	1.17963	0.182887	51.8677	5.4585e-12	8.03905e-11	yes
PARG13678	7.65315	-6.84388	1.35194	51.8684	5.45655e-12	8.03905e-11	yes
PARG19150	186.911	-1.29075	0.2222	51.8553	5.49251e-12	8.08198e-11	yes
PARG12992	819.178	-2.73543	0.372551	51.8244	5.57784e-12	8.20026e-11	yes
PARG01933	54.6425	-2.64082	0.436361	51.8151	5.60402e-12	8.23146e-11	yes
PARG20153	148.432	-1.401	0.222248	51.8125	5.61134e-12	8.23493e-11	yes
PARG02299	42.4581	1.5039	0.273239	51.7964	5.65647e-12	8.29382e-11	yes
PARG23054	64.2556	-2.12278	0.456864	51.7668	5.74095e-12	8.41026e-11	yes
PARG29766	13.2248	1.92948	0.590639	51.7355	5.83155e-12	8.53546e-11	yes
PARG06903	1998.24	1.45559	0.199308	51.7261	5.8589e-12	8.56794e-11	yes
PARG10473	614.663	-1.54994	0.245184	51.7192	5.87934e-12	8.59025e-11	yes
PARG13758	62.2251	5.41784	0.933951	51.6549	6.07118e-12	8.86274e-11	yes
PARG16746	332.577	-1.0544	0.198315	51.6336	6.13639e-12	8.95007e-11	yes
PARG22343	102.374	1.29112	0.307657	51.5957	6.25381e-12	9.11332e-11	yes
PARG27285	731.404	0.767675	0.139414	51.5492	6.40084e-12	9.3194e-11
PARG09310	13.4539	-4.39931	0.826131	51.4849	6.60992e-12	9.61537e-11	yes
PARG05480	187.38	-1.27139	0.181321	51.4654	6.67466e-12	9.70105e-11	yes
PARG04594	90.4641	3.43287	0.472875	51.4608	6.6901e-12	9.71499e-11	yes
PARG13395	775.278	1.8072	0.246206	51.4437	6.7475e-12	9.78738e-11	yes
PARG26779	2614.39	-0.0879424	0.144273	51.4424	6.75175e-12	9.78738e-11
PARG08062	246.868	1.15569	0.210605	51.4399	6.76048e-12	9.79148e-11	yes
PARG02734	33.7402	-1.34784	0.361613	51.4129	6.85211e-12	9.91554e-11	yes
PARG06503	334.246	-0.229757	0.175725	51.3808	6.96312e-12	1.00646e-10
PARG23863	1040.1	-0.0489627	0.0958028	51.3796	6.96723e-12	1.00646e-10
PARG06146	139.894	1.56091	0.331109	51.3766	6.97763e-12	1.00708e-10	yes
PARG23261	2397.08	1.47039	0.244312	51.3496	7.07239e-12	1.01987e-10	yes
PARG02154	619.268	-2.08498	0.283249	51.3254	7.1586e-12	1.03141e-10	yes
PARG23222	22.1365	1.61823	0.403604	51.3213	7.17346e-12	1.03265e-10	yes
PARG08588	18.0087	2.85803	0.614251	51.2601	7.39625e-12	1.06288e-10	yes
PARG19085	260.96	2.97311	0.390757	51.2603	7.39531e-12	1.06288e-10	yes
PARG02285	503.102	1.5166	0.241312	51.2576	7.40564e-12	1.06331e-10	yes
PARG25572	197.389	3.23787	0.446304	51.2399	7.4713e-12	1.07181e-10	yes
PARG02706	1521.51	0.775101	0.116171	51.2093	7.58647e-12	1.08739e-10
PARG10721	1099.68	1.10955	0.176841	51.2034	7.60875e-12	1.08965e-10	yes
PARG07485	471.176	-0.602182	0.154699	51.1988	7.62657e-12	1.09126e-10
PARG28471	63.9763	1.89012	0.309424	51.1713	7.73208e-12	1.1054e-10	yes
PARG28246	130.653	3.36579	0.447208	51.1619	7.76845e-12	1.10964e-10	yes
PARG12136	377.973	-0.474293	0.102766	51.1075	7.98264e-12	1.13926e-10
PARG18475	858.129	1.79292	0.30026	51.0602	8.17365e-12	1.16552e-10	yes
PARG24425	2082.91	-0.984	0.175519	51.0152	8.35964e-12	1.19102e-10	yes
PARG29468	1525.39	2.50027	0.335637	51.01	8.38153e-12	1.19311e-10	yes
PARG18724	15.9	1.95699	0.419709	51.0038	8.40747e-12	1.19578e-10	yes
PARG20392	1162.23	0.895037	0.154137	51.0004	8.42177e-12	1.19679e-10
PARG12687	465.623	-1.67305	0.230501	50.9907	8.46267e-12	1.20157e-10	yes
PARG02713	14.5305	1.80107	0.574293	50.9607	8.5908e-12	1.21872e-10	yes
PARG16172	59.0038	5.78109	0.788175	50.9313	8.71782e-12	1.23568e-10	yes
PARG06106	106.949	-1.48206	0.354073	50.9173	8.77889e-12	1.24328e-10	yes
PARG20120	406.818	1.11565	0.158657	50.883	8.9309e-12	1.26373e-10	yes
PARG27299	2000.18	-1.13377	0.161586	50.8752	8.96565e-12	1.26756e-10	yes
PARG17561	340.901	0.727187	0.191335	50.8567	9.04919e-12	1.27828e-10	yes
PARG07005	16.464	3.14086	0.717601	50.8427	9.11267e-12	1.28616e-10	yes
PARG23645	359.569	-0.883016	0.130476	50.8202	9.21595e-12	1.29963e-10
PARG08339	581.839	-1.02101	0.15056	50.8108	9.25915e-12	1.30461e-10	yes
PARG06887	59.8256	6.34116	0.885528	50.7756	9.42373e-12	1.32668e-10	yes
PARG08956	5974.4	-0.882191	0.15575	50.7653	9.47235e-12	1.33239e-10
PARG12302	187.527	-0.980111	0.283354	50.7216	9.6814e-12	1.36064e-10	yes
PARG16067	181.656	0.964296	0.380704	50.6884	9.84374e-12	1.38229e-10	yes
PARG12768	58.3627	1.76668	0.31198	50.6526	1.00214e-11	1.40486e-10	yes
PARG21597	315.579	-0.0625185	0.292351	50.6534	1.00172e-11	1.40486e-10	yes
PARG00708	2520.28	-0.876631	0.166758	50.6343	1.01137e-11	1.4166e-10	yes
PARG06631	70.0343	-3.65344	0.507093	50.6274	1.01485e-11	1.42028e-10	yes
PARG06087	314.001	-0.0786827	0.295012	50.6041	1.02676e-11	1.43573e-10	yes
PARG07644	418.823	-1.85823	0.276912	50.5882	1.03492e-11	1.44593e-10	yes
PARG28632	71.6574	5.57025	0.752777	50.579	1.0397e-11	1.45139e-10	yes
PARG24697	339.699	4.0468	0.524956	50.5648	1.04709e-11	1.46047e-10	yes
PARG06628	5449.21	2.99794	0.391495	50.5432	1.05849e-11	1.47514e-10	yes
PARG24665	1175.64	0.86296	0.120779	50.5366	1.06196e-11	1.47873e-10
PARG02815	77.5871	2.79178	0.729521	50.53	1.0655e-11	1.48241e-10	yes
PARG07100	186.78	1.02756	0.256106	50.5098	1.0763e-11	1.49618e-10	yes
PARG03675	1411.19	0.505816	0.157794	50.4591	1.10394e-11	1.53332e-10
PARG23241	42.1372	-2.33717	0.34917	50.4305	1.11982e-11	1.55407e-10	yes
PARG21335	1091.41	0.828937	0.182679	50.4084	1.13229e-11	1.57007e-10	yes
PARG07562	1660.46	2.48584	0.359737	50.3607	1.15958e-11	1.60658e-10	yes
PARG28130	175.299	3.65823	0.516901	50.3272	1.17922e-11	1.63242e-10	yes
PARG06403	323.468	-0.692857	0.147534	50.2369	1.23366e-11	1.70636e-10
PARG15218	154.5	-1.61515	0.266343	50.2294	1.23828e-11	1.7099e-10	yes
PARG16420	139.383	-1.29231	0.210808	50.2304	1.2377e-11	1.7099e-10	yes
PARG10963	62.2722	3.76514	0.681396	50.2225	1.24259e-11	1.71402e-10	yes
PARG27458	169.302	-1.46117	0.217295	50.2213	1.24333e-11	1.71402e-10	yes
PARG13543	742.716	3.76211	0.600337	50.198	1.25788e-11	1.73264e-10	yes
PARG07414	4934.08	4.03458	0.539953	50.1288	1.30218e-11	1.79217e-10	yes
PARG07647	632.707	-1.55461	0.227255	50.0873	1.32947e-11	1.82822e-10	yes
PARG05987	331.62	-0.285685	0.187956	50.0306	1.36773e-11	1.87927e-10	yes
PARG07334	106.089	2.46139	0.357849	50.0235	1.37259e-11	1.88439e-10	yes
PARG16201	398.578	-0.58242	0.133	49.9829	1.40075e-11	1.92145e-10
PARG08459	2172.48	3.18374	0.418681	49.9799	1.40286e-11	1.92276e-10	yes
PARG07480	426.012	1.08114	0.367569	49.9556	1.41996e-11	1.9446e-10	yes
PARG04362	514.775	2.76807	0.399872	49.9497	1.4242e-11	1.94879e-10	yes
PARG01942	239.178	0.121309	0.205952	49.9398	1.43122e-11	1.95678e-10	yes
PARG06850	687.712	-0.0795107	0.181927	49.9313	1.43732e-11	1.96351e-10
PARG20511	185.646	-1.13704	0.164571	49.8427	1.50244e-11	2.05078e-10	yes
PARG11792	14.758	1.69388	0.58064	49.8367	1.50691e-11	2.0552e-10	yes
PARG11961	335.312	1.45216	0.219544	49.8328	1.50986e-11	2.05593e-10	yes
PARG24685	101.628	1.57633	0.256262	49.8327	1.50993e-11	2.05593e-10	yes
PARG25688	579.25	-1.02457	0.167961	49.8296	1.5123e-11	2.05747e-10	yes
PARG27845	472.194	-1.74232	0.310197	49.8234	1.51697e-11	2.06213e-10	yes
PARG12006	1954.09	2.64819	0.374102	49.7451	1.57761e-11	2.14281e-10	yes
PARG16046	692.113	2.05959	0.409072	49.7397	1.58181e-11	2.14676e-10	yes
PARG10722	767.179	-0.474961	0.183507	49.7093	1.60607e-11	2.1779e-10	yes
PARG10575	448.463	-1.11052	0.17139	49.6557	1.64967e-11	2.2337e-10	yes
PARG21065	29.8335	1.55496	0.446997	49.6554	1.6499e-11	2.2337e-10	yes
PARG27152	550.195	2.66862	0.380086	49.6495	1.65484e-11	2.23855e-10	yes
PARG02451	1009.4	1.64778	0.421266	49.6474	1.65656e-11	2.23905e-10	yes
PARG22912	66.7637	-4.33622	0.605874	49.5904	1.70444e-11	2.30189e-10	yes
PARG04147	820.462	3.27766	0.582902	49.5295	1.75716e-11	2.36924e-10	yes
PARG12195	10.5074	3.98394	0.792414	49.5296	1.75702e-11	2.36924e-10	yes
PARG02958	10.7038	2.89973	0.582043	49.5206	1.76497e-11	2.37784e-10	yes
PARG23918	507.333	5.23006	0.64994	49.4849	1.79673e-11	2.41866e-10	yes
PARG12651	196.924	-1.06181	0.160238	49.4741	1.80652e-11	2.42987e-10	yes
PARG22266	883.381	0.473135	0.146674	49.4666	1.8133e-11	2.43701e-10
PARG07963	22.2697	-4.55111	0.774121	49.45	1.82837e-11	2.45528e-10	yes
PARG23908	200.705	4.41734	0.560361	49.4391	1.83838e-11	2.46672e-10	yes
PARG12454	414.345	1.45906	0.279811	49.4081	1.86713e-11	2.50126e-10	yes
PARG21661	769.409	-0.433933	0.106546	49.4087	1.8665e-11	2.50126e-10
PARG04598	943.348	3.70775	0.496204	49.403	1.87186e-11	2.50558e-10	yes
PARG02687	823.045	2.37934	0.418388	49.3937	1.88059e-11	2.51523e-10	yes
PARG14135	144.976	-0.462968	0.272701	49.3778	1.89563e-11	2.53328e-10	yes
PARG19102	203.672	1.40493	0.213555	49.3762	1.89714e-11	2.53328e-10	yes
PARG05453	54.3892	1.38267	0.343771	49.3427	1.92916e-11	2.57396e-10	yes
PARG27209	425.655	-0.858756	0.136017	49.3121	1.95894e-11	2.61161e-10
PARG15739	165.79	1.06553	0.248042	49.3021	1.96871e-11	2.62252e-10	yes
PARG19925	2279.36	-0.63784	0.141209	49.2627	2.00791e-11	2.6726e-10
PARG10795	105.14	2.29931	0.385341	49.2235	2.04767e-11	2.72334e-10	yes
PARG19485	161.685	2.45559	0.42871	49.2167	2.0546e-11	2.73037e-10	yes
PARG27042	267.705	-2.42254	0.332786	49.2112	2.06029e-11	2.73573e-10	yes
PARG06719	1575.6	0.343141	0.114855	49.1797	2.09299e-11	2.77693e-10
PARG20144	550.413	1.8047	0.50245	49.167	2.10635e-11	2.79242e-10	yes
PARG07682	2346.58	2.69997	0.373153	49.1605	2.1132e-11	2.79927e-10	yes
PARG02094	520.424	3.14626	0.424103	49.1366	2.13854e-11	2.83058e-10	yes
PARG08319	377.061	-1.39524	0.216942	49.1202	2.15617e-11	2.85073e-10	yes
PARG28125	1332.89	1.28905	0.187353	49.1193	2.1572e-11	2.85073e-10	yes
PARG12615	77.3968	11.1372	1.91769	49.1088	2.16848e-11	2.86336e-10	yes
PARG07975	291.227	-0.934599	0.137931	49.0386	2.24597e-11	2.96332e-10
PARG11097	352.914	1.55736	0.333718	49.0284	2.25741e-11	2.97606e-10	yes
PARG12147	559.548	4.12122	0.547349	48.9856	2.30623e-11	3.038e-10	yes
PARG16365	5404.98	1.94277	0.275854	48.9779	2.31522e-11	3.04742e-10	yes
PARG05533	1021.78	-1.75486	0.339408	48.9464	2.35197e-11	3.09334e-10	yes
PARG27139	104.105	1.7941	0.35678	48.8911	2.41786e-11	3.17748e-10	yes
PARG13330	818.625	0.530986	0.151117	48.8637	2.45118e-11	3.21872e-10
PARG03686	668.214	1.22881	0.28667	48.8536	2.46357e-11	3.23241e-10	yes
PARG06946	5098.29	-2.69587	0.441665	48.8521	2.4655e-11	3.23241e-10	yes
PARG00661	709.486	3.21457	0.433341	48.8445	2.47483e-11	3.24208e-10	yes
PARG06580	487.81	2.50198	0.342835	48.8186	2.50713e-11	3.28181e-10	yes
PARG26350	257.966	-0.699783	0.145385	48.7293	2.62155e-11	3.42888e-10
PARG15893	584.829	1.6086	0.365652	48.7007	2.65935e-11	3.47559e-10	yes
PARG08612	2743.17	-0.240516	0.140148	48.6788	2.68863e-11	3.51109e-10
PARG08103	134.436	3.16342	0.465533	48.675	2.69375e-11	3.51501e-10	yes
PARG08080	18.3015	6.36267	1.1389	48.669	2.70182e-11	3.52277e-10	yes
PARG03023	38.867	4.23221	0.739086	48.5985	2.79879e-11	3.64633e-10	yes
PARG08382	309.807	5.93299	0.939244	48.556	2.85884e-11	3.72165e-10	yes
PARG27696	2548.41	2.60023	0.352437	48.4918	2.9522e-11	3.84017e-10	yes
PARG16017	55.4973	5.36261	0.751055	48.4858	2.96099e-11	3.84859e-10	yes
PARG03221	41.3166	5.28746	0.849911	48.4798	2.96993e-11	3.85719e-10	yes
PARG23854	1800.09	2.01702	0.292397	48.463	2.99505e-11	3.88677e-10	yes
PARG29416	31.6596	-4.06088	0.643336	48.4517	3.012e-11	3.90572e-10	yes
PARG20617	51.6454	1.88329	0.479877	48.4408	3.02833e-11	3.92383e-10	yes
PARG11168	779.792	2.04997	0.322475	48.3885	3.10863e-11	4.02473e-10	yes
PARG29922	582.609	-0.383176	0.10612	48.361	3.15165e-11	4.07724e-10
PARG05198	551.543	-0.372281	0.114505	48.3588	3.15522e-11	4.07869e-10
PARG30010	198.83	5.13972	0.665689	48.3485	3.1714e-11	4.09641e-10	yes
PARG07321	649.876	-1.4638	0.208014	48.277	3.28691e-11	4.24231e-10	yes
PARG08431	184.294	-2.12539	0.299985	48.2217	3.37903e-11	4.35782e-10	yes
PARG11725	14.2739	2.99259	0.644437	48.2119	3.39563e-11	4.37583e-10	yes
PARG17840	124.487	1.97699	0.357723	48.1701	3.46738e-11	4.46483e-10	yes
PARG12391	14.6522	2.0981	0.591111	48.1601	3.48471e-11	4.48365e-10	yes
PARG19711	27.9268	-0.901121	0.329869	48.1122	3.56915e-11	4.58875e-10	yes
PARG14608	69.61	1.46019	0.306036	48.0987	3.59337e-11	4.61631e-10	yes
PARG17703	114.492	-1.91538	0.281579	48.0918	3.60584e-11	4.62875e-10	yes
PARG07247	164.204	9.02095	1.5179	48.0814	3.62461e-11	4.64924e-10	yes
PARG05353	359.209	-0.598467	0.13054	48.0712	3.64305e-11	4.6693e-10
PARG12174	967.752	1.05986	0.217619	48.007	3.76202e-11	4.81806e-10	yes
PARG20016	343.021	1.48951	0.225651	47.9568	3.85758e-11	4.93664e-10	yes
PARG16655	95.5815	-1.09068	0.203089	47.9133	3.94245e-11	5.04136e-10	yes
PARG21433	1774.26	1.17636	0.217471	47.8912	3.98626e-11	5.09345e-10	yes
PARG29823	387.943	0.829888	0.201774	47.8807	4.00725e-11	5.11633e-10	yes
PARG24905	220.05	1.38021	0.252679	47.8772	4.01425e-11	5.12133e-10	yes
PARG20908	347.947	2.02754	0.590759	47.8751	4.01841e-11	5.1227e-10	yes
PARG13256	283.845	-1.98789	0.28342	47.8678	4.03311e-11	5.1375e-10	yes
PARG14225	78.928	3.32338	0.495201	47.8164	4.13815e-11	5.26725e-10	yes
PARG27361	576.066	1.59914	0.242636	47.8067	4.15822e-11	5.28874e-10	yes
PARG03949	423.453	6.20146	0.759357	47.8051	4.16159e-11	5.28897e-10	yes
PARG04972	110.656	1.34688	0.235675	47.7904	4.19222e-11	5.32384e-10	yes
PARG27800	100.664	-1.10766	0.250842	47.7683	4.23892e-11	5.37903e-10	yes
PARG23733	33.1187	-8.67583	1.40835	47.7565	4.26391e-11	5.4066e-10	yes
PARG19736	943.115	1.39844	0.286986	47.7466	4.2851e-11	5.42933e-10	yes
PARG29391	2227.32	0.370353	0.172378	47.7447	4.28915e-11	5.4303e-10
PARG29762	2974.93	-1.57405	0.233909	47.7228	4.33633e-11	5.48586e-10	yes
PARG07580	410.914	-0.0230385	0.236993	47.6898	4.40844e-11	5.57284e-10	yes
PARG07686	1805.51	0.324159	0.14872	47.6785	4.43354e-11	5.6003e-10
PARG05830	86.9505	4.51793	0.823072	47.6597	4.47526e-11	5.6487e-10	yes
PARG14338	327.513	-0.806446	0.145842	47.652	4.4926e-11	5.66627e-10
PARG07454	23.4566	3.69564	0.744846	47.6495	4.49825e-11	5.6691e-10	yes
PARG03113	1014.16	-0.271355	0.0722554	47.6263	4.55061e-11	5.73073e-10
PARG12944	129.472	1.72933	0.374638	47.607	4.59476e-11	5.78194e-10	yes
PARG25295	1146.84	1.00419	0.252453	47.5917	4.63018e-11	5.8221e-10	yes
PARG05662	24.1146	-3.36041	0.554915	47.5816	4.65358e-11	5.8471e-10	yes
PARG17952	716.068	-0.70387	0.168349	47.5661	4.68974e-11	5.88808e-10	yes
PARG22751	2087.88	5.49692	0.725354	47.5372	4.75802e-11	5.96929e-10	yes
PARG13917	170.446	-1.26802	0.184977	47.5281	4.77979e-11	5.99206e-10	yes
PARG03301	1003.92	0.878437	0.324785	47.5263	4.78399e-11	5.9928e-10	yes
PARG25315	191.093	-1.20827	0.178803	47.4559	4.95542e-11	6.20287e-10	yes
PARG07170	282.128	-0.680562	0.14284	47.4535	4.96141e-11	6.20568e-10
PARG20183	1086.8	0.750301	0.340126	47.4316	5.01593e-11	6.26916e-10	yes
PARG19394	15.3475	-4.09246	0.750408	47.4258	5.03071e-11	6.28289e-10	yes
PARG30037	114.086	-1.64311	0.244369	47.3947	5.10935e-11	6.37631e-10	yes
PARG27486	275.581	-1.02078	0.201012	47.3861	5.13133e-11	6.39893e-10	yes
PARG07759	1304.2	4.73612	0.605454	47.3739	5.16278e-11	6.43332e-10	yes
PARG18119	254.888	1.40084	0.259116	47.2894	5.38575e-11	6.70613e-10	yes
PARG09463	33.0617	2.51997	0.530581	47.2677	5.44441e-11	6.77409e-10	yes
PARG05723	821.522	-0.836015	0.202647	47.263	5.45715e-11	6.78486e-10	yes
PARG05891	163.139	2.09182	0.515173	47.2502	5.49218e-11	6.8233e-10	yes
PARG22248	102.81	3.62348	0.680837	47.2458	5.50442e-11	6.83338e-10	yes
PARG24944	980.864	-0.453196	0.184102	47.2354	5.53301e-11	6.86374e-10	yes
PARG09254	247.616	0.703422	0.459216	47.2207	5.57382e-11	6.9092e-10	yes
PARG13243	799.099	1.33313	0.271919	47.2034	5.6224e-11	6.96423e-10	yes
PARG22143	516.085	13.8705	2.02054	47.1437	5.79274e-11	7.16987e-10	yes
PARG05508	345.847	-0.488659	0.101582	47.1406	5.80156e-11	7.17543e-10
PARG00488	35.8134	1.68321	0.301386	47.1369	5.81235e-11	7.18343e-10	yes
PARG29367	2079.7	1.03532	0.160799	47.1236	5.85119e-11	7.22605e-10	yes
PARG24759	429.274	0.598474	0.115857	47.1211	5.85833e-11	7.22948e-10
PARG16070	246.372	-1.4316	0.208507	47.118	5.86764e-11	7.2356e-10	yes
PARG29300	335.4	3.23478	0.441383	47.0855	5.96359e-11	7.34846e-10	yes
PARG19894	793.085	2.31036	0.346869	47.0681	6.01572e-11	7.4072e-10	yes
PARG00462	1999.02	1.93498	0.273555	46.972	6.312e-11	7.76624e-10	yes
PARG23906	269.2	4.59101	0.589219	46.9679	6.32486e-11	7.7763e-10	yes
PARG26432	57.9715	4.05606	0.595215	46.9446	6.399e-11	7.86163e-10	yes
PARG07662	1080.6	-0.691933	0.114733	46.9406	6.41185e-11	7.87158e-10
PARG17442	198.813	2.67167	0.386693	46.9235	6.46683e-11	7.93322e-10	yes
PARG17901	626.764	1.53221	0.243845	46.9039	6.53053e-11	8.00544e-10	yes
PARG26778	25.6421	-2.54475	1.28018	46.8659	6.6558e-11	8.15299e-10	yes
PARG05726	828.888	-0.918182	0.142203	46.819	6.81359e-11	8.34012e-10
PARG10343	596.592	-0.491148	0.108736	46.8091	6.84746e-11	8.3754e-10
PARG16781	209.255	3.22017	0.480648	46.788	6.92e-11	8.45789e-10	yes
PARG21809	2424.98	4.04462	0.525731	46.7756	6.9633e-11	8.50455e-10	yes
PARG22733	74.3425	4.88952	0.682949	46.7634	7.00582e-11	8.54391e-10	yes
PARG26431	386.853	2.25344	0.375679	46.7634	7.00575e-11	8.54391e-10	yes
PARG26357	447.29	2.15185	0.31776	46.7364	7.10098e-11	8.6536e-10	yes
PARG20276	384.042	0.755194	0.159905	46.7256	7.1394e-11	8.69403e-10
PARG27712	61.9715	0.965876	0.422158	46.6969	7.24267e-11	8.81333e-10	yes
PARG14144	41.7466	6.74014	1.30352	46.6941	7.25295e-11	8.81938e-10	yes
PARG26751	252.535	0.823117	0.289431	46.6872	7.27799e-11	8.84334e-10	yes
PARG11656	406.371	1.36128	0.289172	46.675	7.32242e-11	8.89082e-10	yes
PARG26803	56.1121	-1.53824	0.922051	46.6602	7.37664e-11	8.9501e-10	yes
PARG22183	96.5229	2.83921	0.550611	46.6218	7.5197e-11	9.11702e-10	yes
PARG05963	253.542	0.841139	0.136137	46.5986	7.60743e-11	9.21665e-10
PARG23576	5949.36	3.97406	0.559815	46.5821	7.67065e-11	9.28647e-10	yes
PARG23099	2264.9	-3.95198	0.516253	46.5586	7.76108e-11	9.3891e-10	yes
PARG26029	269.52	0.910523	0.167678	46.5518	7.78775e-11	9.4145e-10
PARG10126	44.5278	-2.33896	0.356124	46.5314	7.86734e-11	9.50379e-10	yes
PARG27875	347.396	1.17072	0.224624	46.5215	7.90647e-11	9.54412e-10	yes
PARG17488	600.636	1.1023	0.175765	46.51	7.95212e-11	9.59224e-10	yes
PARG15410	243.895	-0.848859	0.134258	46.4811	8.068e-11	9.72496e-10
PARG17992	491.095	0.611044	0.534565	46.4792	8.0754e-11	9.72682e-10	yes
PARG14202	1386.8	1.12187	0.182547	46.376	8.50321e-11	1.02347e-09	yes
PARG07169	276.21	-0.897668	0.141584	46.3526	8.60318e-11	1.03475e-09
PARG07140	364.185	-2.83142	0.401894	46.3451	8.63545e-11	1.03788e-09	yes
PARG11887	42.0889	-2.78514	0.426002	46.3434	8.64286e-11	1.03802e-09	yes
PARG21089	143.237	0.271389	0.27282	46.3073	8.80009e-11	1.05614e-09	yes
PARG24710	345.755	1.74346	0.307432	46.2968	8.84663e-11	1.06096e-09	yes
PARG09140	1694.97	-0.695591	0.102207	46.2838	8.90415e-11	1.06708e-09
PARG16924	656.668	-0.943148	0.152972	46.2463	9.07277e-11	1.08651e-09
PARG21241	1005.46	1.66959	0.246684	46.2443	9.082e-11	1.08683e-09	yes
PARG08735	198.546	1.92389	0.440338	46.2425	9.09005e-11	1.08701e-09	yes
PARG20585	106.217	0.467652	0.241995	46.2348	9.12521e-11	1.09043e-09	yes
PARG12508	1304.6	-1.37255	0.236879	46.2268	9.16166e-11	1.09399e-09	yes
PARG20093	123.911	2.05144	0.507698	46.1897	9.33323e-11	1.11368e-09	yes
PARG29494	539.203	0.949857	0.191602	46.1856	9.35224e-11	1.11515e-09	yes
PARG19535	11054.8	2.68471	0.394274	46.1829	9.36519e-11	1.11589e-09	yes
PARG06888	3521.37	0.792451	0.264799	46.1326	9.60342e-11	1.14345e-09	yes
PARG11258	185.85	-0.414621	0.159466	46.1214	9.65772e-11	1.1491e-09
PARG07710	121.261	5.97113	0.841145	46.0821	9.84907e-11	1.17102e-09	yes
PARG03439	2153.91	1.15922	0.287516	46.0653	9.93209e-11	1.1792e-09	yes
PARG12512	192.494	11.4944	2.16706	46.0659	9.92942e-11	1.1792e-09	yes
PARG28436	2241.51	0.841318	0.178975	46.0507	1.0005e-10	1.18701e-09	yes
PARG24011	16.3095	-3.7055	0.92442	46.0431	1.00429e-10	1.19066e-09	yes
PARG03653	62.4046	-0.215338	0.261194	46.0174	1.01729e-10	1.2052e-09	yes
PARG24904	1191.3	1.18118	0.243017	46.0134	1.01932e-10	1.20675e-09	yes
PARG01850	66.5756	1.59676	0.267123	46.0022	1.02506e-10	1.21268e-09	yes
PARG07164	30.6295	2.83035	0.448854	45.9729	1.0402e-10	1.22972e-09	yes
PARG28120	1641.94	0.825593	0.144837	45.9637	1.04498e-10	1.23449e-09
PARG06242	5216.99	2.22563	0.320839	45.942	1.05637e-10	1.24706e-09	yes
PARG15573	28.1725	2.36548	0.619276	45.9324	1.06148e-10	1.2522e-09	yes
PARG01923	542.297	-0.471754	0.146427	45.9033	1.077e-10	1.26961e-09
PARG29345	153.251	-1.32566	0.208391	45.8868	1.08596e-10	1.27926e-09	yes
PARG10765	1687.5	0.00120388	0.167904	45.866	1.0973e-10	1.2917e-09
PARG30166	151.584	-0.903707	0.157124	45.8342	1.11489e-10	1.31148e-09
PARG05634	421.552	-2.04818	0.293697	45.8237	1.12075e-10	1.31743e-09	yes
PARG08988	1037.26	-0.88989	0.197079	45.8143	1.12602e-10	1.32269e-09	yes
PARG26911	66.2581	4.37552	0.834002	45.8102	1.12836e-10	1.3245e-09	yes
PARG10344	233.271	0.804599	0.413832	45.7871	1.14143e-10	1.3389e-09	yes
PARG28475	38.184	0.956446	0.3462	45.7693	1.15168e-10	1.34998e-09	yes
PARG05928	175.521	0.660665	0.230408	45.7524	1.16142e-10	1.36043e-09	yes
PARG05251	220.618	0.652837	0.183395	45.7329	1.17282e-10	1.37281e-09	yes
PARG12142	28.06	3.9027	0.77997	45.7237	1.17821e-10	1.37815e-09	yes
PARG18568	109.842	2.55524	0.63476	45.718	1.18158e-10	1.38112e-09	yes
PARG01271	46.5943	-4.96712	0.771316	45.6984	1.19323e-10	1.39375e-09	yes
PARG29532	259.816	0.0398563	0.169362	45.6851	1.20119e-10	1.40207e-09
PARG06151	2467.12	0.785201	0.142961	45.6566	1.21839e-10	1.42114e-09
PARG11041	493.783	-1.06761	0.161873	45.5989	1.25407e-10	1.46173e-09	yes
PARG06053	284.289	2.71017	0.381758	45.5752	1.269e-10	1.47809e-09	yes
PARG28720	52.5116	-2.45208	0.372029	45.5614	1.27778e-10	1.48728e-09	yes
PARG17891	506.943	0.786285	0.129125	45.5437	1.28917e-10	1.49948e-09
PARG10582	840.86	-1.34696	0.28065	45.525	1.30128e-10	1.51251e-09	yes
PARG04974	77.2245	-1.21681	0.22177	45.5209	1.30393e-10	1.51453e-09	yes
PARG23915	159.986	4.52933	0.607586	45.5169	1.30655e-10	1.51651e-09	yes
PARG02333	177.17	-2.04268	0.316369	45.5124	1.30951e-10	1.51888e-09	yes
PARG11823	189.207	-0.896868	0.203787	45.5097	1.31126e-10	1.51985e-09	yes
PARG17472	164.864	3.49989	0.481197	45.4965	1.31997e-10	1.52888e-09	yes
PARG17474	202.07	2.60197	0.381422	45.4381	1.35909e-10	1.5731e-09	yes
PARG02112	210.082	0.616515	0.275364	45.4342	1.36173e-10	1.57505e-09	yes
PARG06854	764.161	1.68694	0.252828	45.3951	1.3886e-10	1.60389e-09	yes
PARG22876	2177.82	4.96487	0.693602	45.3952	1.38854e-10	1.60389e-09	yes
PARG23937	451.901	3.09841	0.494869	45.3766	1.40149e-10	1.61766e-09	yes
PARG25126	407.65	0.971455	0.196538	45.3517	1.41905e-10	1.63678e-09	yes
PARG08614	56.9698	3.42096	0.85264	45.3042	1.45317e-10	1.67499e-09	yes
PARG20103	69.5563	-3.13268	0.462507	45.3002	1.45605e-10	1.67714e-09	yes
PARG11032	340.497	-2.95874	0.477957	45.2968	1.45858e-10	1.67888e-09	yes
PARG10686	725.073	-2.33324	0.386816	45.2683	1.4795e-10	1.7006e-09	yes
PARG24032	54.8456	0.401744	0.272322	45.2687	1.47923e-10	1.7006e-09	yes
PARG02045	28.2171	5.39748	1.048	45.2583	1.48691e-10	1.70794e-09	yes
PARG15367	44.2899	1.92878	0.437572	45.238	1.50208e-10	1.72417e-09	yes
PARG24356	850.062	2.29356	0.426592	45.2254	1.51157e-10	1.73387e-09	yes
PARG00836	1154.83	2.72366	0.39295	45.22	1.51563e-10	1.73733e-09	yes
PARG27638	334.834	2.54751	0.378911	45.1976	1.53275e-10	1.75573e-09	yes
PARG05760	533.083	1.50465	0.221806	45.1455	1.57321e-10	1.80083e-09	yes
PARG28071	5237.89	-1.53686	0.256059	45.1401	1.57741e-10	1.8044e-09	yes
PARG00538	560.185	0.486194	0.413967	45.1265	1.58823e-10	1.81553e-09	yes
PARG12786	223.379	-0.969651	0.170385	45.0931	1.61492e-10	1.84476e-09	yes
PARG05665	1371.94	1.27214	0.207849	45.0873	1.61961e-10	1.84885e-09	yes
PARG23859	1225.52	-1.43555	0.210265	45.0828	1.62329e-10	1.85178e-09	yes
PARG12211	199.115	2.07052	0.382127	45.0539	1.6469e-10	1.87742e-09	yes
PARG17654	171.307	-1.03693	0.15567	45.0525	1.64806e-10	1.87745e-09	yes
PARG21167	517.441	-2.20613	0.317261	45.0258	1.67024e-10	1.90141e-09	yes
PARG05252	418.022	1.60046	0.311919	45.0202	1.67492e-10	1.90544e-09	yes
PARG06540	274.187	1.68957	0.247175	44.9899	1.70049e-10	1.9332e-09	yes
PARG27418	320.397	1.98402	0.324258	44.9823	1.70695e-10	1.93921e-09	yes
PARG20573	229.63	-1.66461	0.270883	44.9648	1.72197e-10	1.95495e-09	yes
PARG25288	2458.21	1.56141	0.312494	44.9538	1.73143e-10	1.96434e-09	yes
PARG29417	21799.3	-1.92948	0.278679	44.8986	1.77989e-10	2.01794e-09	yes
PARG01764	217.355	-2.30324	0.339838	44.8892	1.78824e-10	2.02602e-09	yes
PARG12548	1683.85	2.0304	0.304743	44.8734	1.80249e-10	2.04077e-09	yes
PARG00522	166.19	0.841096	0.141139	44.8447	1.82851e-10	2.06882e-09
PARG12470	116.056	-0.599503	0.291025	44.827	1.84479e-10	2.08581e-09	yes
PARG13208	813.011	0.215186	0.161325	44.8218	1.84952e-10	2.08975e-09
PARG08752	1290.12	1.32894	0.20036	44.8078	1.86255e-10	2.10303e-09	yes
PARG08686	96.0055	-1.52592	0.236027	44.7919	1.87746e-10	2.11842e-09	yes
PARG11558	271.392	-0.978836	0.172235	44.785	1.88389e-10	2.12424e-09	yes
PARG20359	53.3558	-2.45714	0.374392	44.7835	1.88529e-10	2.12438e-09	yes
PARG10879	921.884	-0.49808	0.0804745	44.7511	1.91615e-10	2.15768e-09
PARG27922	6387.75	0.744269	0.271186	44.742	1.92483e-10	2.16599e-09	yes
PARG12854	416.812	1.76141	0.267998	44.7383	1.9284e-10	2.16853e-09	yes
PARG12939	371.01	0.578301	0.12199	44.7356	1.93106e-10	2.17005e-09
PARG03588	2771.12	-0.726313	0.117087	44.6861	1.97941e-10	2.22288e-09
PARG16593	30.7572	3.37172	0.717464	44.6791	1.98638e-10	2.2292e-09	yes
PARG10629	286.938	-0.600702	0.125191	44.6564	2.009e-10	2.25155e-09
PARG22601	2242.57	-0.93411	0.169209	44.6567	2.00877e-10	2.25155e-09
PARG26695	643.502	-1.32456	0.207822	44.6492	2.01632e-10	2.25823e-09	yes
PARG12172	81.1896	2.47651	0.500087	44.6376	2.02796e-10	2.26973e-09	yes
PARG12834	69.1269	-1.79398	0.274096	44.6189	2.04705e-10	2.28955e-09	yes
PARG08483	9.9209	2.64189	0.836782	44.6152	2.05085e-10	2.29226e-09	yes
PARG04345	49.5541	-1.30581	0.359971	44.6009	2.06556e-10	2.30599e-09	yes
PARG08886	1246.23	4.50647	0.638271	44.6006	2.06591e-10	2.30599e-09	yes
PARG12542	504.382	-1.05359	0.167029	44.5795	2.08773e-10	2.32877e-09	yes
PARG19361	439.942	-2.52795	0.362801	44.5454	2.12366e-10	2.36726e-09	yes
PARG04146	1429.44	3.15383	0.601274	44.536	2.13368e-10	2.37524e-09	yes
PARG20460	274.384	-2.1273	0.364675	44.536	2.13367e-10	2.37524e-09	yes
PARG11107	287.271	2.5367	0.601594	44.5283	2.14188e-10	2.38277e-09	yes
PARG10308	389.767	-0.761735	0.122111	44.5263	2.1441e-10	2.38364e-09
PARG02957	521.74	-0.918898	0.155958	44.5199	2.15098e-10	2.38969e-09
PARG18509	50.7053	-2.25163	0.395695	44.5148	2.15648e-10	2.39419e-09	yes
PARG25354	3488.85	2.72857	0.384687	44.5035	2.16869e-10	2.40614e-09	yes
PARG08920	1063.33	1.4641	0.270522	44.4898	2.18357e-10	2.42104e-09	yes
PARG06522	600.226	0.626113	0.196935	44.4698	2.20545e-10	2.44366e-09	yes
PARG27954	270.356	-1.12683	0.194222	44.4618	2.21433e-10	2.45187e-09	yes
PARG00143	122.552	2.4703	0.669823	44.4545	2.22242e-10	2.45918e-09	yes
PARG19289	222.933	-1.02817	0.155189	44.4201	2.26101e-10	2.50021e-09	yes
PARG05629	3748.45	0.627461	0.303736	44.3852	2.30083e-10	2.54255e-09	yes
PARG19347	70.2514	1.67061	0.283437	44.3762	2.31117e-10	2.55228e-09	yes
PARG23981	1376.02	1.7244	0.263439	44.3684	2.32017e-10	2.56051e-09	yes
PARG05447	456.004	-0.11206	0.278545	44.3539	2.33705e-10	2.57744e-09	yes
PARG11581	1056.66	1.34356	0.206282	44.3206	2.37637e-10	2.61732e-09	yes
PARG26697	27.3555	3.48527	0.569525	44.3207	2.37623e-10	2.61732e-09	yes
PARG27039	181.126	1.73563	0.355294	44.316	2.38176e-10	2.62152e-09	yes
PARG19055	80.3455	-3.32848	0.51417	44.3012	2.39946e-10	2.63924e-09	yes
PARG22002	665.124	2.36578	0.349638	44.2904	2.41244e-10	2.65177e-09	yes
PARG12802	452.427	1.47617	0.221647	44.2357	2.47939e-10	2.72356e-09	yes
PARG20040	229.658	-0.830731	0.13537	44.2233	2.49474e-10	2.73861e-09
PARG19120	3072.44	2.35897	0.357623	44.2113	2.50982e-10	2.75334e-09	yes
PARG21811	1996.88	3.90743	0.52729	44.1893	2.53757e-10	2.78194e-09	yes
PARG19633	45.0985	1.43754	0.368707	44.1634	2.57064e-10	2.81634e-09	yes
PARG01361	194.79	5.25262	0.700405	44.1317	2.61164e-10	2.85937e-09	yes
PARG30095	5314.98	-0.886309	0.135717	44.1163	2.63191e-10	2.87966e-09
PARG19471	158.182	-1.11269	0.194131	44.1007	2.65245e-10	2.90022e-09	yes
PARG00443	433.524	0.234057	0.116688	44.0978	2.65634e-10	2.90257e-09
PARG05863	492.503	-0.817675	0.190433	44.0572	2.71077e-10	2.96009e-09	yes
PARG15059	3008.92	4.21655	0.595317	44.0209	2.76053e-10	3.01244e-09	yes
PARG17497	1734.67	1.10387	0.171814	44.0066	2.78023e-10	3.03195e-09	yes
PARG05978	803.582	0.647011	0.139206	44.0035	2.78458e-10	3.03378e-09
PARG15133	681.534	1.35521	0.234673	44.0028	2.78556e-10	3.03378e-09	yes
PARG10957	65.3788	1.00636	0.351032	43.8883	2.94964e-10	3.21037e-09	yes
PARG06036	1145.14	2.10738	0.348921	43.8791	2.96336e-10	3.22319e-09	yes
PARG10206	151.702	1.03478	0.176738	43.8401	3.02158e-10	3.28436e-09	yes
PARG27811	1337.03	-0.525965	0.144019	43.8385	3.02406e-10	3.28491e-09
PARG27095	3270.55	3.77792	0.533558	43.8223	3.0486e-10	3.30939e-09	yes
PARG16037	94.7291	2.38958	0.441134	43.7947	3.09102e-10	3.35045e-09	yes
PARG20680	47.521	-1.73546	0.290632	43.7947	3.09104e-10	3.35045e-09	yes
PARG27364	171.719	-0.948475	0.214353	43.7938	3.09248e-10	3.35045e-09	yes
PARG23735	19.4652	-4.6941	0.855607	43.7898	3.09857e-10	3.35486e-09	yes
PARG18362	311.894	-0.812342	0.139673	43.7657	3.13621e-10	3.39061e-09
PARG24718	1520.92	0.517246	0.186146	43.7656	3.13625e-10	3.39061e-09	yes
PARG26434	42.5884	4.21709	0.645775	43.7647	3.13771e-10	3.39061e-09	yes
PARG09027	3033.93	1.58151	0.420527	43.7618	3.14225e-10	3.39331e-09	yes
PARG10108	535.827	-1.42856	0.217499	43.7267	3.19796e-10	3.45055e-09	yes
PARG11782	56.6258	1.58641	0.566447	43.7258	3.19942e-10	3.45055e-09	yes
PARG06158	54.3981	0.470108	0.621308	43.7089	3.22659e-10	3.47759e-09	yes
PARG00536	92.7729	1.13158	0.388142	43.7037	3.23498e-10	3.48438e-09	yes
PARG05828	689.82	1.51951	0.22698	43.6879	3.26049e-10	3.50958e-09	yes
PARG14438	50.0359	-3.57394	0.897112	43.6703	3.28936e-10	3.53835e-09	yes
PARG27260	796.199	2.80696	0.402736	43.6373	3.3441e-10	3.5949e-09	yes
PARG03015	858.361	0.394656	0.121304	43.5653	3.46664e-10	3.72422e-09
PARG18308	1049.95	1.36614	0.2091	43.5504	3.49258e-10	3.74967e-09	yes
PARG08880	309.313	2.43686	0.403515	43.5292	3.5298e-10	3.78473e-09	yes
PARG16315	136.668	-2.747	0.404571	43.5304	3.52763e-10	3.78473e-09	yes
PARG08567	542.61	1.02293	0.173903	43.4959	3.58914e-10	3.84587e-09	yes
PARG08694	306.998	-0.208944	0.36534	43.4897	3.60017e-10	3.8552e-09	yes
PARG25425	1806.3	3.75938	0.534925	43.4435	3.6844e-10	3.94285e-09	yes
PARG12187	5792.71	0.242939	0.366106	43.4381	3.69431e-10	3.95091e-09	yes
PARG19757	177.174	-3.6913	0.63774	43.4184	3.73098e-10	3.98756e-09	yes
PARG28562	50.9074	1.90673	0.427928	43.417	3.73354e-10	3.98773e-09	yes
PARG22579	270.915	1.24388	0.439458	43.3977	3.76978e-10	4.02385e-09	yes
PARG03923	889.09	-0.4061	0.131858	43.383	3.79749e-10	4.05082e-09
PARG15987	571.654	-0.740596	0.113373	43.3744	3.81394e-10	4.06576e-09
PARG11278	7124.89	-0.828525	0.143707	43.3707	3.82102e-10	4.07069e-09
PARG08105	340.614	4.13196	0.991701	43.3364	3.88698e-10	4.1383e-09	yes
PARG12397	1045.72	1.11338	0.465367	43.2964	3.96549e-10	4.21918e-09	yes
PARG01419	352.334	-1.2756	0.202617	43.2927	3.97285e-10	4.22237e-09	yes
PARG13870	2817.88	1.74468	0.271806	43.2924	3.97358e-10	4.22237e-09	yes
PARG22822	1301.27	1.27113	0.192126	43.2849	3.98849e-10	4.23551e-09	yes
PARG08901	201.671	2.27892	0.358541	43.2808	3.99672e-10	4.24153e-09	yes
PARG18159	3044.67	1.16788	0.2093	43.2675	4.02336e-10	4.26708e-09	yes
PARG03442	31.4242	3.52825	0.695108	43.2522	4.05422e-10	4.29432e-09	yes
PARG11015	63.2358	-1.02637	0.299516	43.2529	4.05281e-10	4.29432e-09	yes
PARG02595	380.184	-0.655829	0.112799	43.248	4.06268e-10	4.30054e-09
PARG07064	330.74	1.27583	0.192178	43.2367	4.08578e-10	4.32223e-09	yes
PARG20100	325.894	0.522894	0.12603	43.2272	4.10514e-10	4.33994e-09
PARG13913	353.131	2.2288	0.354585	43.2251	4.10957e-10	4.34186e-09	yes
PARG03864	29.8286	-2.03178	0.409886	43.2222	4.11546e-10	4.34532e-09	yes
PARG05416	174.173	2.04054	0.350276	43.2023	4.15661e-10	4.38319e-09	yes
PARG29409	596.416	-1.09695	0.203143	43.2027	4.15585e-10	4.38319e-09	yes
PARG12510	1198.61	-1.67339	0.346411	43.1716	4.22087e-10	4.44531e-09	yes
PARG15174	479.077	0.482951	0.400122	43.1728	4.21829e-10	4.44531e-09	yes
PARG20492	412.834	11.1409	2.08689	43.1539	4.25853e-10	4.48212e-09	yes
PARG11664	79.8432	11.1834	2.0384	43.0851	4.4074e-10	4.63587e-09	yes
PARG02806	565.137	1.83315	0.305843	43.058	4.46759e-10	4.6962e-09	yes
PARG15820	53.0679	-1.19147	0.437616	43.0462	4.49403e-10	4.72101e-09	yes
PARG00323	449.637	-0.196897	0.172562	43.0441	4.49881e-10	4.72304e-09
PARG02916	305.197	-0.816756	0.193009	43.0288	4.53323e-10	4.75617e-09	yes
PARG24749	5403.15	2.80101	0.415859	42.9958	4.6088e-10	4.8324e-09	yes
PARG03111	1003.59	-0.987021	0.16516	42.9927	4.61578e-10	4.83666e-09
PARG12600	6258.01	2.44354	0.474291	42.9633	4.68425e-10	4.90531e-09	yes
PARG06413	119.321	-1.40694	0.229057	42.9554	4.70276e-10	4.92159e-09	yes
PARG24668	46.3853	3.26896	0.612403	42.9245	4.77595e-10	4.99504e-09	yes
PARG27849	2175.71	1.23959	0.337988	42.9178	4.79202e-10	5.00869e-09	yes
PARG13588	45.2361	3.87493	0.746319	42.9136	4.80209e-10	5.01516e-09	yes
PARG18956	269.468	1.76087	0.289473	42.9127	4.80426e-10	5.01516e-09	yes
PARG08448	302.241	3.17609	0.485551	42.91	4.81065e-10	5.01868e-09	yes
PARG01456	423.123	-0.839747	0.144363	42.9083	4.81489e-10	5.01995e-09
PARG02504	256.847	-0.853777	0.19498	42.8952	4.84642e-10	5.04965e-09	yes
PARG17270	1437.24	1.37668	0.251941	42.8789	4.88607e-10	5.08777e-09	yes
PARG00953	660.352	-1.18912	0.187348	42.8679	4.91315e-10	5.11275e-09	yes
PARG25579	599.622	0.643308	0.113624	42.8511	4.95458e-10	5.15264e-09
PARG28010	220.15	-0.0777629	0.155015	42.8368	4.99007e-10	5.1863e-09
PARG06857	136.311	1.68539	0.334249	42.8318	5.00263e-10	5.19609e-09	yes
PARG00566	69.6773	-3.12815	0.492888	42.8272	5.01416e-10	5.20482e-09	yes
PARG08964	522.871	2.65965	0.417332	42.825	5.01969e-10	5.20731e-09	yes
PARG06028	119.734	1.66909	0.266127	42.8193	5.03393e-10	5.21882e-09	yes
PARG01433	174.649	5.17493	0.702283	42.8026	5.07615e-10	5.2593e-09	yes
PARG08405	204.373	3.4246	0.650136	42.7963	5.09218e-10	5.27262e-09	yes
PARG29765	12.839	1.20354	0.631708	42.7904	5.10717e-10	5.28484e-09	yes
PARG29723	116.023	5.13936	0.721198	42.7598	5.18605e-10	5.36312e-09	yes
PARG00834	381.345	0.738554	0.26068	42.7329	5.25625e-10	5.43233e-09	yes
PARG18465	1270.55	-0.441142	0.120202	42.7171	5.2978e-10	5.46947e-09
PARG29297	980.32	1.22075	0.204149	42.7167	5.29878e-10	5.46947e-09	yes
PARG06934	425.037	12.6304	2.06283	42.7027	5.33607e-10	5.50454e-09	yes
PARG12536	841.946	-1.48268	0.277943	42.6928	5.36274e-10	5.52519e-09	yes
PARG22512	39.6514	0.159665	0.458524	42.6931	5.36192e-10	5.52519e-09	yes
PARG15927	540.221	-0.757317	0.124969	42.6692	5.42627e-10	5.58717e-09
PARG11860	525.069	-0.403546	0.115311	42.6437	5.4958e-10	5.65526e-09
PARG03659	304.012	0.863595	0.161769	42.6424	5.49945e-10	5.65551e-09
PARG14126	1506.33	0.429824	0.186507	42.63	5.53362e-10	5.68712e-09	yes
PARG12853	764.627	-0.691666	0.116962	42.6261	5.54442e-10	5.6947e-09
PARG23812	14816.6	3.17607	0.454501	42.6085	5.59341e-10	5.73939e-09	yes
PARG25191	243.917	2.13694	0.334003	42.608	5.59485e-10	5.73939e-09	yes
PARG10509	16.4858	1.50245	0.565767	42.5948	5.63206e-10	5.774e-09	yes
PARG07289	401.242	0.332074	0.129134	42.5918	5.64044e-10	5.77901e-09
PARG29301	75.8564	3.11782	0.457752	42.5904	5.64435e-10	5.77946e-09	yes
PARG08049	290.51	-1.66301	0.287656	42.5845	5.66088e-10	5.7928e-09	yes
PARG21712	2726.48	3.69632	0.566068	42.5811	5.6707e-10	5.79927e-09	yes
PARG28090	1264.95	4.38879	0.623478	42.5713	5.6986e-10	5.82422e-09	yes
PARG15998	421.803	-1.49321	0.227934	42.5585	5.73496e-10	5.85778e-09	yes
PARG03070	2008.23	-0.544032	0.0839193	42.5559	5.74244e-10	5.86181e-09
PARG17995	141.291	-1.77115	0.584413	42.5016	5.90072e-10	6.01967e-09	yes
PARG20202	164.05	-0.563663	0.175306	42.4616	6.01987e-10	6.13746e-09	yes
PARG12377	14.2394	2.16895	0.453158	42.4414	6.08084e-10	6.19581e-09	yes
PARG01011	83.9658	-2.21616	0.45578	42.4253	6.12989e-10	6.24196e-09	yes
PARG24787	668.995	-1.11628	0.170025	42.4139	6.16493e-10	6.27379e-09	yes
PARG25937	249.572	5.5137	0.948883	42.4102	6.17649e-10	6.2817e-09	yes
PARG12210	317.961	0.610599	0.502949	42.4047	6.19351e-10	6.29515e-09	yes
PARG02674	90.37	4.78474	0.679981	42.3781	6.27657e-10	6.37567e-09	yes
PARG07366	53.9001	6.62862	1.12774	42.3725	6.29391e-10	6.38937e-09	yes
PARG12216	299.298	-0.589313	0.115613	42.3614	6.329e-10	6.42107e-09
PARG28199	257.398	1.30008	0.198134	42.3451	6.38091e-10	6.46978e-09	yes
PARG01245	33.2346	-3.012	0.485275	42.34	6.39712e-10	6.48226e-09	yes
PARG30400	14.2734	3.32848	0.566683	42.3368	6.40751e-10	6.48882e-09	yes
PARG29359	26.7503	3.42467	0.53917	42.3328	6.42009e-10	6.4976e-09	yes
PARG16576	310.928	-1.01663	0.180182	42.3229	6.45221e-10	6.52613e-09	yes
PARG04591	117.923	3.08454	0.450581	42.3159	6.47477e-10	6.54495e-09	yes
PARG00986	158.067	1.39336	0.223265	42.3142	6.48035e-10	6.54661e-09	yes
PARG24696	150.339	-1.59928	0.265622	42.2923	6.55143e-10	6.61439e-09	yes
PARG23790	303.31	-1.08932	0.226299	42.2806	6.58983e-10	6.64912e-09	yes
PARG26485	205.839	1.53338	0.338118	42.2694	6.62713e-10	6.68269e-09	yes
PARG16245	15.4677	3.16235	0.597504	42.2635	6.64667e-10	6.69833e-09	yes
PARG27864	2661.36	1.33578	0.427854	42.2512	6.68741e-10	6.73529e-09	yes
PARG14811	178.643	2.15339	0.537467	42.2267	6.76985e-10	6.81418e-09	yes
PARG22004	1501.49	3.38757	0.576814	42.2124	6.81852e-10	6.85902e-09	yes
PARG23831	1547.21	-0.0844878	0.0858218	42.2074	6.83552e-10	6.87196e-09
PARG19449	366.472	1.05224	0.289801	42.1429	7.05973e-10	7.09306e-09	yes
PARG10290	684.712	-0.526309	0.15227	42.1247	7.12422e-10	7.15352e-09
PARG09116	2485.14	1.83385	0.283749	42.1162	7.15445e-10	7.17954e-09	yes
PARG20340	2140.17	1.04096	0.218928	42.104	7.19845e-10	7.21933e-09	yes
PARG11806	517.525	-1.48139	0.253139	42.1007	7.2103e-10	7.22684e-09	yes
PARG25931	249.709	5.55367	0.955124	42.0926	7.23948e-10	7.25171e-09	yes
PARG02191	141.312	-1.75942	0.267804	42.0908	7.24608e-10	7.25394e-09	yes
PARG00850	7027.4	3.76394	0.524519	42.0738	7.30771e-10	7.31123e-09	yes
PARG28091	1473.17	3.74506	0.549047	42.037	7.44368e-10	7.44278e-09	yes
PARG13088	661.113	-0.360153	0.370174	42.0343	7.45373e-10	7.44834e-09	yes
PARG07700	2132.74	1.59351	0.431572	41.9985	7.58826e-10	7.57821e-09	yes
PARG14430	296.767	3.52391	0.515157	41.992	7.61291e-10	7.59826e-09	yes
PARG20834	242.81	-2.06584	0.338634	41.9731	7.6853e-10	7.6659e-09	yes
PARG24922	17.6334	2.51103	0.51966	41.957	7.74752e-10	7.72332e-09	yes
PARG05805	122.797	2.25892	0.552816	41.9395	7.81559e-10	7.7865e-09	yes
PARG08419	1769.49	-0.735214	0.128219	41.9307	7.85007e-10	7.81616e-09
PARG08003	25.6776	4.7174	0.811345	41.9207	7.88912e-10	7.85033e-09	yes
PARG27830	329.034	2.19743	0.373066	41.9171	7.90356e-10	7.86e-09	yes
PARG20197	412.651	-1.11564	0.184549	41.9109	7.92795e-10	7.87953e-09	yes
PARG08475	125.609	1.83289	0.447826	41.9011	7.96698e-10	7.91358e-09	yes
PARG21713	476.525	0.58635	0.146314	41.8994	7.97391e-10	7.91573e-09
PARG23385	84.7876	-0.535473	0.25659	41.8932	7.99853e-10	7.93542e-09	yes
PARG01974	81.5892	1.54068	0.398497	41.876	8.06763e-10	7.99919e-09	yes
PARG03196	1411.86	-0.469643	0.120436	41.863	8.12022e-10	8.04653e-09
PARG08089	11.6104	4.31291	0.940578	41.8388	8.21912e-10	8.13967e-09	yes
PARG29213	377.613	3.94108	0.656696	41.8317	8.24819e-10	8.1636e-09	yes
PARG12780	68.7584	6.7095	0.963869	41.8276	8.26517e-10	8.17552e-09	yes
PARG02539	3396.76	2.32113	0.413483	41.8253	8.27458e-10	8.17996e-09	yes
PARG08836	1176	-0.768738	0.119398	41.8217	8.28948e-10	8.18981e-09
PARG21719	3279.06	0.9436	0.216373	41.8197	8.29771e-10	8.19306e-09	yes
PARG21876	25.9114	1.12408	0.541167	41.8148	8.3184e-10	8.20861e-09	yes
PARG24251	219.767	1.66995	0.584226	41.7496	8.59391e-10	8.47545e-09	yes
PARG29289	207.45	6.10239	0.80084	41.7408	8.63174e-10	8.5077e-09	yes
PARG03267	276.364	-2.07819	0.312345	41.7314	8.6724e-10	8.5427e-09	yes
PARG07852	1897.39	-0.317189	0.0923989	41.7269	8.6921e-10	8.55703e-09
PARG23911	186.036	4.01765	0.566093	41.6981	8.81802e-10	8.67584e-09	yes
PARG18618	14.6944	2.40504	0.605708	41.6897	8.85517e-10	8.70723e-09	yes
PARG00058	242.622	1.73509	0.314444	41.6754	8.91851e-10	8.76432e-09	yes
PARG11844	1064.65	-1.48916	0.24825	41.6668	8.95713e-10	8.79707e-09	yes
PARG19072	185.373	-0.128537	0.259681	41.6196	9.17099e-10	9.00178e-09	yes
PARG24389	83.3199	3.91957	0.781393	41.6163	9.18621e-10	9.01139e-09	yes
PARG09456	170.636	-1.53623	0.247738	41.6099	9.21567e-10	9.03494e-09	yes
PARG17706	115.942	-1.89334	0.298074	41.6072	9.22808e-10	9.04178e-09	yes
PARG29269	2202.65	-1.63173	0.249508	41.5502	9.49465e-10	9.29747e-09	yes
PARG18909	341.765	1.65949	0.293907	41.5476	9.50741e-10	9.30448e-09	yes
PARG21418	74.8006	5.64804	0.850769	41.5179	9.64954e-10	9.43801e-09	yes
PARG16192	227.891	0.968213	0.253092	41.4972	9.74977e-10	9.53043e-09	yes
PARG00477	194.124	-1.60176	0.305642	41.4932	9.76925e-10	9.54385e-09	yes
PARG03736	413.896	0.540359	0.159691	41.491	9.77993e-10	9.54837e-09
PARG29216	949.016	2.11153	0.316091	41.4899	9.78538e-10	9.54837e-09	yes
PARG15426	86.4384	-1.27914	0.203527	41.462	9.92287e-10	9.67684e-09	yes
PARG27046	186.101	-0.825303	0.153361	41.458	9.943e-10	9.69078e-09
PARG01256	164.224	1.12982	0.280782	41.4411	1.00274e-09	9.76731e-09	yes
PARG07751	617.847	-1.04532	0.412594	41.4293	1.00865e-09	9.81908e-09	yes
PARG15847	417.827	2.16157	0.443409	41.4122	1.01733e-09	9.89197e-09	yes
PARG28053	1246.14	-0.954154	0.189002	41.4129	1.01698e-09	9.89197e-09	yes
PARG11644	52.5612	0.985165	0.447802	41.3577	1.04543e-09	1.01593e-08	yes
PARG29539	1058.3	1.35228	0.208911	41.3237	1.06333e-09	1.03272e-08	yes
PARG15428	238.009	-0.397957	0.205656	41.3085	1.07145e-09	1.04e-08	yes
PARG09056	48.5042	1.0148	0.278989	41.2906	1.08107e-09	1.04872e-08	yes
PARG22878	144.4	-1.74841	0.277202	41.2803	1.08664e-09	1.05351e-08	yes
PARG23506	150.249	-0.620985	0.246773	41.2702	1.09215e-09	1.05824e-08	yes
PARG11892	276.031	-4.2276	0.611276	41.2367	1.11059e-09	1.07547e-08	yes
PARG10955	28.7819	3.77997	0.842679	41.2276	1.11569e-09	1.07978e-08	yes
PARG27625	195.273	-4.69208	0.700373	41.2179	1.12112e-09	1.0844e-08	yes
PARG12531	1072.62	1.44111	0.269341	41.1628	1.15241e-09	1.11402e-08	yes
PARG24370	159.085	-1.12366	0.178565	41.159	1.15459e-09	1.11548e-08	yes
PARG08887	156.745	4.51946	0.697584	41.1409	1.16511e-09	1.12499e-08	yes
PARG22989	15.418	3.80602	0.655734	41.1164	1.17945e-09	1.13817e-08	yes
PARG28527	88.9715	0.495814	0.225309	41.1128	1.18161e-09	1.13959e-08	yes
PARG11012	1569.95	2.33773	0.381184	41.1099	1.18334e-09	1.14059e-08	yes
PARG13018	48.2464	1.87482	0.40069	41.0872	1.19681e-09	1.15291e-08	yes
PARG11224	61.1871	0.737472	0.28288	41.0653	1.20998e-09	1.16493e-08	yes
PARG18482	1272.98	1.94893	0.294425	41.0601	1.21313e-09	1.16727e-08	yes
PARG01980	409.676	0.617942	0.417391	41.0416	1.22443e-09	1.17746e-08	yes
PARG23223	656.593	0.991772	0.254261	41.0149	1.24088e-09	1.1926e-08	yes
PARG19184	426.766	-2.48354	0.380976	41.0052	1.2469e-09	1.19768e-08	yes
PARG15718	474.394	1.37682	0.253979	40.9955	1.25295e-09	1.2028e-08	yes
PARG22393	254.768	0.863951	0.175358	40.9911	1.25574e-09	1.20479e-08
PARG03511	2910.49	4.31982	0.624439	40.988	1.25768e-09	1.20526e-08	yes
PARG30359	644.55	3.6187	0.790723	40.988	1.25767e-09	1.20526e-08	yes
PARG05851	501.257	-0.840068	0.200347	40.9846	1.25984e-09	1.20662e-08	yes
PARG28109	149.357	-1.92268	0.3054	40.9578	1.27679e-09	1.22216e-08	yes
PARG23892	203.13	4.84362	1.01915	40.9197	1.30135e-09	1.24494e-08	yes
PARG26907	807.751	1.35302	0.209266	40.8847	1.32435e-09	1.26622e-08	yes
PARG08638	245.393	2.63636	0.391822	40.8785	1.32847e-09	1.26942e-08	yes
PARG08744	64.638	0.791462	0.255611	40.8734	1.33187e-09	1.27194e-08	yes
PARG11000	918.986	1.37427	0.288162	40.8698	1.33422e-09	1.27346e-08	yes
PARG07354	8907.35	3.14152	0.507381	40.8643	1.33789e-09	1.27623e-08	yes
PARG30399	13.2019	2.87797	0.502036	40.8385	1.35527e-09	1.29206e-08	yes
PARG10628	163.705	1.55744	0.407103	40.8372	1.35614e-09	1.29215e-08	yes
PARG03092	517.74	2.22118	0.412374	40.8307	1.3606e-09	1.29566e-08	yes
PARG23264	1019.6	0.361365	0.136001	40.8198	1.36801e-09	1.30196e-08
PARG04470	162.993	-0.141359	0.700313	40.8149	1.37137e-09	1.30393e-08	yes
PARG28283	428.694	-0.965092	0.152152	40.8145	1.37165e-09	1.30393e-08
PARG14835	188.28	-1.13827	0.179099	40.7827	1.39365e-09	1.32409e-08	yes
PARG06054	1692.64	0.973143	0.151247	40.7278	1.43239e-09	1.36011e-08
PARG21729	3534.29	-0.336834	0.127725	40.7119	1.44384e-09	1.37021e-08
PARG02983	812.749	-1.66025	0.25611	40.7075	1.44704e-09	1.37246e-08	yes
PARG08846	11.4619	1.61702	0.63407	40.7022	1.45085e-09	1.37529e-08	yes
PARG02034	259.294	-0.871873	0.212334	40.6513	1.48828e-09	1.40996e-08	yes
PARG06684	456.407	-0.34038	0.59269	40.6408	1.49614e-09	1.41659e-08	yes
PARG11989	1508.32	1.6515	0.271883	40.6323	1.50247e-09	1.42178e-08	yes
PARG12718	1192.58	1.09633	0.18135	40.5907	1.53403e-09	1.45082e-08	yes
PARG03245	67.5342	2.73857	0.655356	40.5703	1.54981e-09	1.46491e-08	yes
PARG17676	5623.25	2.99459	0.444084	40.5675	1.55198e-09	1.46612e-08	yes
PARG00761	80.4744	2.52004	0.576643	40.5583	1.55913e-09	1.47204e-08	yes
PARG15744	3512.39	0.842362	0.437877	40.54	1.57341e-09	1.48467e-08	yes
PARG21100	3007.09	3.0003	0.498626	40.5256	1.58482e-09	1.4946e-08	yes
PARG23912	111.509	4.2737	0.612995	40.5132	1.59469e-09	1.50305e-08	yes
PARG22684	561.196	-0.442859	0.210147	40.4995	1.60561e-09	1.51248e-08	yes
PARG26556	14.2853	-2.59767	1.19729	40.4922	1.61151e-09	1.51718e-08	yes
PARG19594	1147.87	1.40728	0.323758	40.4787	1.62243e-09	1.5266e-08	yes
PARG06678	170.281	0.703518	0.564055	40.4546	1.64206e-09	1.54419e-08	yes
PARG29412	382.148	-1.07679	0.19195	40.4508	1.6452e-09	1.54627e-08	yes
PARG16094	115.274	-4.23024	0.837698	40.3866	1.69886e-09	1.59579e-08	yes
PARG12885	175.86	1.78794	0.340332	40.3667	1.71586e-09	1.61085e-08	yes
PARG19076	475.688	4.02549	0.567665	40.3176	1.75854e-09	1.64999e-08	yes
PARG07094	480.623	-0.0557923	0.179429	40.3147	1.76102e-09	1.65138e-08
PARG06906	1057.86	1.86057	0.285423	40.3072	1.76765e-09	1.65666e-08	yes
PARG03354	2479.49	0.375427	0.169593	40.3018	1.77247e-09	1.66024e-08
PARG09445	264.498	-1.08586	0.174324	40.282	1.79013e-09	1.67584e-08	yes
PARG20471	305.129	-0.645701	0.124298	40.2799	1.79194e-09	1.67659e-08
PARG19660	137.829	2.51445	0.526593	40.2248	1.84204e-09	1.72249e-08	yes
PARG13499	168.085	0.402861	0.133506	40.2143	1.85169e-09	1.73053e-08
PARG27689	1215.47	0.899945	0.153317	40.2113	1.85447e-09	1.73216e-08
PARG12641	601.212	-0.844905	0.135778	40.2068	1.85864e-09	1.73508e-08
PARG12294	130.209	3.00908	0.538474	40.2039	1.8614e-09	1.73668e-08	yes
PARG20317	1240.82	-0.384254	0.094635	40.2026	1.86256e-09	1.73679e-08
PARG21126	162.766	0.26986	0.44934	40.1687	1.89445e-09	1.76553e-08	yes
PARG07906	539.631	-1.04155	0.165624	40.1349	1.92667e-09	1.79454e-08	yes
PARG20017	1076.12	-0.791093	0.236912	40.1338	1.92774e-09	1.79454e-08	yes
PARG19555	325.087	6.50244	0.898258	40.1231	1.9381e-09	1.80317e-08	yes
PARG02475	137.692	2.48354	0.431492	40.1138	1.94711e-09	1.81054e-08	yes
PARG02096	349.955	1.08104	0.536284	40.1011	1.95954e-09	1.82108e-08	yes
PARG12616	109.349	-0.786811	0.198704	40.0938	1.9667e-09	1.82467e-08	yes
PARG24435	2716.72	1.6391	0.265146	40.0953	1.96529e-09	1.82467e-08	yes
PARG28089	2087.11	2.62417	0.399339	40.0948	1.96569e-09	1.82467e-08	yes
PARG17852	19.7849	0.633056	0.497416	40.0728	1.98748e-09	1.84292e-08	yes
PARG04304	1565.05	0.955198	0.172483	40.0333	2.02711e-09	1.87861e-08
PARG07117	5628.91	-0.628731	0.19206	39.9858	2.07582e-09	1.92268e-08	yes
PARG24130	512.408	-0.931532	0.157402	39.9741	2.08799e-09	1.93287e-08
PARG03650	26.0454	1.27004	0.428242	39.9713	2.09097e-09	1.93456e-08	yes
PARG06759	140.52	2.34305	0.389656	39.9666	2.09588e-09	1.93802e-08	yes
PARG01043	18.8139	-0.125616	0.657105	39.9629	2.09978e-09	1.94055e-08	yes
PARG19901	339.068	3.30202	0.487705	39.9162	2.14937e-09	1.98526e-08	yes
PARG05513	648.068	0.767072	0.223764	39.9128	2.15305e-09	1.98756e-08	yes
PARG02168	583.96	0.901741	0.143957	39.9108	2.15517e-09	1.98841e-08
PARG26554	1106.97	-0.665043	0.178543	39.9067	2.15957e-09	1.99137e-08	yes
PARG10286	202.063	-2.01684	0.328525	39.9033	2.16329e-09	1.99369e-08	yes
PARG28116	428.258	0.0920391	0.139724	39.8866	2.18144e-09	2.0093e-08
PARG06708	571.868	4.66609	0.643148	39.8831	2.18526e-09	2.0117e-08	yes
PARG25206	276.398	-0.992703	0.158228	39.8807	2.1878e-09	2.01293e-08
PARG16074	163.361	2.0877	0.381659	39.849	2.22278e-09	2.04339e-08	yes
PARG30380	137.26	-1.08037	0.173502	39.8485	2.22338e-09	2.04339e-08	yes
PARG15342	16.9799	2.50165	0.54348	39.8257	2.24879e-09	2.0656e-08	yes
PARG15735	653.947	-1.17051	0.18793	39.806	2.27114e-09	2.08498e-08	yes
PARG19164	1155.18	3.68256	0.558129	39.7956	2.28299e-09	2.0947e-08	yes
PARG02195	445.846	1.74617	0.523839	39.7896	2.28975e-09	2.09945e-08	yes
PARG27974	1146.91	-0.957385	0.189732	39.7888	2.2907e-09	2.09945e-08
PARG22653	87.1129	1.53555	0.426093	39.7835	2.29679e-09	2.10387e-08	yes
PARG16071	220.91	0.330599	0.153525	39.7669	2.31595e-09	2.12025e-08
PARG18637	186.046	-0.918305	0.193147	39.7641	2.31917e-09	2.12202e-08	yes
PARG29384	1539.11	2.88406	0.474688	39.7557	2.32893e-09	2.12978e-08	yes
PARG19534	500.766	1.00197	0.190429	39.7336	2.35484e-09	2.1523e-08
PARG19427	2068.67	3.09688	0.494076	39.7306	2.35834e-09	2.1543e-08	yes
PARG02233	332.911	1.03828	0.241184	39.7277	2.36177e-09	2.15625e-08	yes
PARG06769	10.7272	-5.04227	1.10919	39.722	2.3685e-09	2.1612e-08	yes
PARG22104	177.065	1.63271	0.313301	39.7185	2.37266e-09	2.16381e-08	yes
PARG01391	130.611	2.51535	0.576788	39.7148	2.37701e-09	2.16659e-08	yes
PARG27323	1968.12	-1.38441	0.298998	39.6845	2.41333e-09	2.19849e-08	yes
PARG27576	1537.39	0.844386	0.136422	39.6786	2.42053e-09	2.20384e-08
PARG05524	597.21	3.12788	0.909245	39.6731	2.42718e-09	2.20868e-08	yes
PARG08048	142.642	2.27866	0.645565	39.6706	2.43024e-09	2.21025e-08	yes
PARG18954	208.391	-0.711971	0.130091	39.6482	2.45759e-09	2.2339e-08
PARG02067	491.158	1.26645	0.200128	39.6453	2.46109e-09	2.23586e-08	yes
PARG04559	36.5503	4.7577	0.764704	39.6382	2.46987e-09	2.24158e-08	yes
PARG12779	79.5126	6.4742	0.925231	39.638	2.47008e-09	2.24158e-08	yes
PARG13380	555.424	2.60864	0.454488	39.6279	2.48261e-09	2.25171e-08	yes
PARG12028	316.965	-3.87721	0.58163	39.6095	2.50563e-09	2.27135e-08	yes
PARG22661	389.016	-0.764627	0.129666	39.599	2.51871e-09	2.28196e-08
PARG21115	4486.94	3.19354	0.512053	39.5823	2.53982e-09	2.29983e-08	yes
PARG09339	18.0965	4.24097	0.759273	39.5723	2.55264e-09	2.31018e-08	yes
PARG08331	2304.76	2.79181	0.434469	39.5646	2.56247e-09	2.31781e-08	yes
PARG04555	21.7037	1.94526	0.45254	39.5516	2.57916e-09	2.33164e-08	yes
PARG22347	143.727	2.13542	0.454322	39.5482	2.58355e-09	2.33433e-08	yes
PARG07444	437.99	3.32712	0.534737	39.54	2.59415e-09	2.34254e-08	yes
PARG19929	123.571	2.13948	0.366067	39.539	2.59545e-09	2.34254e-08	yes
PARG27499	1245.48	0.986011	0.250918	39.5261	2.61222e-09	2.35639e-08	yes
PARG07741	642.685	-1.56849	0.331776	39.5246	2.61419e-09	2.35689e-08	yes
PARG20401	965.503	0.527263	0.268121	39.4894	2.66065e-09	2.39748e-08	yes
PARG10399	216.211	1.56518	0.304083	39.4781	2.67565e-09	2.40871e-08	yes
PARG18834	299.052	-1.22191	0.194145	39.4779	2.67603e-09	2.40871e-08	yes
PARG28410	602.661	-0.334416	0.20951	39.4728	2.6828e-09	2.4135e-08	yes
PARG13046	1720.24	1.70365	0.270149	39.4677	2.68963e-09	2.41834e-08	yes
PARG02891	217.972	-1.60818	0.467491	39.4517	2.71128e-09	2.43649e-08	yes
PARG28088	2112.98	2.59943	0.399568	39.4395	2.72792e-09	2.45011e-08	yes
PARG29741	37.8719	-1.09498	0.295183	39.4373	2.73085e-09	2.45141e-08	yes
PARG05121	675.094	1.22238	0.260698	39.4101	2.76825e-09	2.48364e-08	yes
PARG19125	1062.93	0.879973	0.247086	39.376	2.8158e-09	2.52494e-08	yes
PARG17138	369.162	-0.790021	0.15704	39.3651	2.83131e-09	2.53748e-08
PARG28106	925.16	0.832851	0.136586	39.3624	2.83513e-09	2.53953e-08
PARG04912	1621.34	2.61201	0.39847	39.3601	2.83829e-09	2.54099e-08	yes
PARG04915	726.849	-2.25994	0.369032	39.3354	2.87356e-09	2.57118e-08	yes
PARG07924	208.854	-0.828753	0.153184	39.3134	2.90543e-09	2.5983e-08
PARG05592	594.179	0.862049	0.136926	39.3077	2.91374e-09	2.60432e-08
PARG19819	800.423	0.322539	0.224066	39.3008	2.92378e-09	2.61189e-08	yes
PARG26975	1222.92	-1.0566	0.294704	39.2801	2.95414e-09	2.63759e-08	yes
PARG08393	551.298	-0.839549	0.173287	39.2758	2.96056e-09	2.6419e-08
PARG22713	67.9404	1.48598	0.415043	39.252	2.99593e-09	2.67203e-08	yes
PARG20331	38.3706	3.1308	0.679507	39.2333	3.02417e-09	2.69576e-08	yes
PARG16786	29.0997	2.68472	0.452136	39.2313	3.02717e-09	2.69699e-08	yes
PARG11425	150.122	-0.914362	0.150042	39.2287	3.03114e-09	2.69908e-08
PARG24368	5975.82	-0.589112	0.110944	39.2123	3.05601e-09	2.71977e-08
PARG03752	92.3929	3.98781	0.945768	39.2007	3.07378e-09	2.73412e-08	yes
PARG08314	547.782	-0.407604	0.259683	39.1951	3.08237e-09	2.73735e-08	yes
PARG16776	5455.46	4.48218	0.630675	39.1957	3.08156e-09	2.73735e-08	yes
PARG22839	2122.03	2.64741	0.436686	39.1952	3.08232e-09	2.73735e-08	yes
PARG27723	209.988	-0.636991	0.156408	39.1606	3.13609e-09	2.78357e-08
PARG04596	109.543	3.11692	0.473929	39.158	3.14011e-09	2.78417e-08	yes
PARG23916	376.104	4.32051	0.609188	39.1583	3.13974e-09	2.78417e-08	yes
PARG20402	95.9542	-1.24244	0.249118	39.1512	3.1509e-09	2.79224e-08	yes
PARG08071	35.3869	0.0979164	0.335786	39.1244	3.19332e-09	2.82832e-08	yes
PARG13797	1403.81	0.299403	0.131645	39.1019	3.22946e-09	2.85881e-08
PARG14943	342.081	2.43876	0.601764	39.0971	3.23724e-09	2.86416e-08	yes
PARG05721	738.215	1.33268	0.373857	39.0693	3.28253e-09	2.9014e-08	yes
PARG12728	51.133	-2.40437	0.467588	39.0691	3.28283e-09	2.9014e-08	yes
PARG24268	2100.83	0.726563	0.123261	39.0537	3.3083e-09	2.92236e-08
PARG11736	11380	2.57044	0.411167	39.0295	3.34857e-09	2.95636e-08	yes
PARG21681	25.7188	-3.64618	0.630431	39.0252	3.35571e-09	2.96109e-08	yes
PARG01065	394.284	-0.840723	0.160712	39.0206	3.36345e-09	2.96634e-08
PARG19617	103.304	2.07794	0.484668	39.018	3.36784e-09	2.96863e-08	yes
PARG22818	2630.69	-0.651915	0.128204	39	3.39818e-09	2.99379e-08
PARG02700	551.372	0.776877	0.182811	38.9911	3.41345e-09	3.00564e-08
PARG20184	782.192	-0.0520514	0.132869	38.9618	3.46374e-09	3.04831e-08
PARG20656	15030.1	1.98751	0.311553	38.9448	3.49334e-09	3.07273e-08	yes
PARG19312	396.567	0.54842	0.149836	38.9183	3.54e-09	3.11213e-08
PARG18900	161.891	4.03058	0.895055	38.9133	3.54882e-09	3.11822e-08	yes
PARG20835	2894.02	0.156913	0.115536	38.9097	3.55515e-09	3.12213e-08
PARG16421	527.945	-0.575264	0.162087	38.8821	3.60455e-09	3.16384e-08
PARG15209	801.996	1.12645	0.450868	38.8567	3.6507e-09	3.20266e-08	yes
PARG26897	173.776	-2.2127	0.360632	38.8361	3.68849e-09	3.23411e-08	yes
PARG22734	1159.91	3.07293	0.49402	38.8168	3.72422e-09	3.26371e-08	yes
PARG11902	794.415	-3.49238	0.518747	38.8004	3.75495e-09	3.2889e-08	yes
PARG24516	2726.44	1.45572	0.252274	38.7613	3.82913e-09	3.3521e-08	yes
PARG14085	104.907	-1.18375	0.202259	38.7565	3.83828e-09	3.35834e-08	yes
PARG25004	492.126	2.1589	0.403857	38.7381	3.8737e-09	3.38755e-08	yes
PARG08409	52.3934	3.36296	0.522139	38.7278	3.89377e-09	3.40331e-08	yes
PARG16127	1959.32	-0.546128	0.127798	38.7059	3.93655e-09	3.43889e-08
PARG23909	128.888	4.25365	0.618666	38.6954	3.95728e-09	3.45518e-08	yes
PARG17942	111.435	1.65074	0.289668	38.5957	4.15964e-09	3.62995e-08	yes
PARG15660	504.045	-0.743439	0.141114	38.5892	4.17317e-09	3.63985e-08
PARG24343	244.568	-0.906423	0.203088	38.573	4.20712e-09	3.66753e-08
PARG11446	88.9989	3.37888	0.530875	38.5529	4.24948e-09	3.70251e-08	yes
PARG24687	583.321	1.4527	0.257391	38.5508	4.25399e-09	3.7045e-08	yes
PARG20516	4450.07	-0.787604	0.152715	38.5478	4.26046e-09	3.70819e-08
PARG07266	915.487	-0.252008	0.354534	38.5318	4.29461e-09	3.73595e-08	yes
PARG11866	727.127	1.26546	0.203401	38.5261	4.3068e-09	3.74459e-08	yes
PARG06086	775.705	2.58922	0.57771	38.5176	4.32528e-09	3.75869e-08	yes
PARG26693	116.255	1.50835	0.385569	38.508	4.34615e-09	3.77485e-08	yes
PARG24704	349.894	-0.894346	0.147496	38.4912	4.38265e-09	3.80456e-08
PARG24329	1073.7	0.846341	0.15825	38.4815	4.40401e-09	3.8211e-08
PARG04902	3367.78	0.895082	0.176655	38.4628	4.44537e-09	3.85497e-08
PARG28271	54.0352	-2.19659	0.362602	38.4553	4.46214e-09	3.8675e-08	yes
PARG05146	951.765	0.902174	0.295421	38.4526	4.46817e-09	3.8707e-08	yes
PARG22923	23.5521	1.50977	0.333521	38.4025	4.58146e-09	3.96677e-08	yes
PARG26349	147.685	-1.0868	0.236906	38.3628	4.67337e-09	4.04424e-08	yes
PARG02914	84.7025	1.55937	0.29146	38.3555	4.69037e-09	4.05684e-08	yes
PARG02376	1088.27	4.8588	0.696338	38.349	4.70569e-09	4.06797e-08	yes
PARG02689	403.264	-1.04328	0.168214	38.3256	4.76098e-09	4.11362e-08	yes
PARG03368	421.427	-0.701523	0.113825	38.3181	4.77889e-09	4.12695e-08
PARG14169	67.2581	2.76945	0.830059	38.3091	4.80039e-09	4.14121e-08	yes
PARG27328	210.013	-0.915164	0.150172	38.3096	4.79932e-09	4.14121e-08
PARG14978	37.6351	1.94	0.482258	38.3031	4.81498e-09	4.15164e-08	yes
PARG00437	822.181	0.255437	0.109067	38.2986	4.82566e-09	4.15869e-08
PARG07563	70.1541	4.74491	1.17755	38.2809	4.86869e-09	4.19359e-08	yes
PARG12375	24.7341	2.59162	0.437759	38.2714	4.89194e-09	4.21143e-08	yes
PARG02954	146.237	0.865909	0.281236	38.1679	5.15161e-09	4.43076e-08	yes
PARG24325	106.033	-1.11051	0.189601	38.1677	5.15205e-09	4.43076e-08	yes
PARG27824	504.471	-2.59823	0.416191	38.1503	5.1972e-09	4.46728e-08	yes
PARG11595	98.9088	1.79941	0.457752	38.1474	5.20481e-09	4.4715e-08	yes
PARG06459	962.978	0.636332	0.119259	38.1286	5.2539e-09	4.51134e-08
PARG21866	932.073	0.805897	0.147884	38.1186	5.2803e-09	4.53167e-08
PARG20658	41.907	-2.58099	0.432639	38.1125	5.29622e-09	4.54173e-08	yes
PARG29273	94.6705	1.15619	0.409116	38.1121	5.2975e-09	4.54173e-08	yes
PARG00486	501.976	-1.00933	0.164499	38.1059	5.31372e-09	4.55035e-08	yes
PARG06198	212.044	2.47363	0.386674	38.1071	5.31079e-09	4.55035e-08	yes
PARG29401	507.575	0.697943	0.114545	38.1042	5.31823e-09	4.55035e-08
PARG29703	115.818	-1.21899	0.236484	38.1041	5.31852e-09	4.55035e-08	yes
PARG11346	379.507	-2.23682	0.378545	38.0928	5.34867e-09	4.57379e-08	yes
PARG25635	112.561	-0.91947	0.167022	38.0593	5.43898e-09	4.64623e-08
PARG28235	2840.33	3.11498	0.611358	38.0595	5.43867e-09	4.64623e-08	yes
PARG08335	97.5601	-1.62195	0.290449	38.045	5.47809e-09	4.67723e-08	yes
PARG15248	137.28	-1.29212	0.225887	38.0414	5.48793e-09	4.68322e-08	yes
PARG26641	7947.99	3.66493	0.538826	38.0365	5.50154e-09	4.69243e-08	yes
PARG07284	12.2017	0.00227228	0.424864	38.0337	5.5093e-09	4.69663e-08	yes
PARG04356	26.4876	0.912102	0.333373	38.0262	5.52983e-09	4.71171e-08	yes
PARG18910	2628.27	-0.999542	0.163341	38.0175	5.55409e-09	4.72995e-08	yes
PARG13432	274.764	1.58907	0.253353	38.0002	5.60231e-09	4.76857e-08	yes
PARG21355	107.549	4.19183	0.68644	37.9858	5.6428e-09	4.80057e-08	yes
PARG15708	791.905	-3.50006	0.527985	37.9782	5.66418e-09	4.8163e-08	yes
PARG27102	86.4023	2.05164	0.428566	37.9436	5.76311e-09	4.89791e-08	yes
PARG06483	470.851	-0.78292	0.249956	37.9268	5.81167e-09	4.93665e-08	yes
PARG25389	2057.85	0.843688	0.150701	37.9152	5.84546e-09	4.96281e-08
PARG00137	32.2127	2.77185	0.682395	37.8824	5.94217e-09	5.04234e-08	yes
PARG12487	31.2816	2.01349	0.389176	37.8756	5.9625e-09	5.057e-08	yes
PARG03480	220.689	1.49942	0.282608	37.866	5.99098e-09	5.07856e-08	yes
PARG00701	2171.28	0.674808	0.175111	37.8612	6.00545e-09	5.08823e-08
PARG01084	422.937	1.33866	0.295463	37.8572	6.01757e-09	5.0959e-08	yes
PARG11452	862.893	1.42057	0.278599	37.8544	6.02593e-09	5.10038e-08	yes
PARG11213	1406.37	-0.894398	0.187811	37.8521	6.03279e-09	5.10358e-08	yes
PARG07353	299.344	-0.75345	0.128421	37.8269	6.10922e-09	5.1656e-08
PARG22707	13.2801	0.0736994	0.52732	37.8224	6.12317e-09	5.17476e-08	yes
PARG20072	2304.59	0.522501	0.0974556	37.8133	6.15088e-09	5.19554e-08
PARG07748	27.6579	4.8598	0.789339	37.7897	6.22395e-09	5.25458e-08	yes
PARG17420	149.634	10.9923	1.75785	37.7877	6.23023e-09	5.25721e-08	yes
PARG03357	28.1159	2.0367	0.54726	37.7578	6.32394e-09	5.33357e-08	yes
PARG16720	47.7034	3.64585	0.64783	37.7469	6.35856e-09	5.36005e-08	yes
PARG21276	213.436	1.53289	0.256054	37.7158	6.4583e-09	5.44137e-08	yes
PARG19293	43.9681	3.43398	0.708267	37.7135	6.46579e-09	5.44491e-08	yes
PARG23157	10.6717	2.54267	0.784203	37.7092	6.47964e-09	5.4538e-08	yes
PARG14268	4575.33	3.6355	0.605292	37.6695	6.60957e-09	5.56034e-08	yes
PARG05211	1671.72	0.146691	0.0852158	37.667	6.6179e-09	5.56453e-08
PARG20354	26.145	2.17627	0.411565	37.6612	6.6372e-09	5.57794e-08	yes
PARG09888	2051.31	-0.128798	0.0979467	37.6583	6.64651e-09	5.58294e-08
PARG10804	87.3678	2.50621	0.439008	37.6554	6.65631e-09	5.58551e-08	yes
PARG14647	1756.72	1.0442	0.245346	37.6559	6.65465e-09	5.58551e-08	yes
PARG26973	52.087	-0.457677	0.356682	37.6475	6.68274e-09	5.60485e-08	yes
PARG16495	196.98	-0.9686	0.174141	37.6463	6.68664e-09	5.6053e-08
PARG02173	758.242	-1.16226	0.256366	37.6419	6.7015e-09	5.61492e-08	yes
PARG24926	2980.46	2.79964	0.460772	37.6341	6.72745e-09	5.63098e-08	yes
PARG26002	412.119	-1.06445	0.226966	37.6343	6.7269e-09	5.63098e-08	yes
PARG17684	729.897	-0.372391	0.127168	37.6184	6.7805e-09	5.67252e-08
PARG01460	1947.78	-1.01633	0.421713	37.593	6.86727e-09	5.74221e-08	yes
PARG07615	20.3218	0.862958	0.492428	37.5813	6.90762e-09	5.77305e-08	yes
PARG18589	28.3263	-2.00156	0.452542	37.5723	6.93854e-09	5.79597e-08	yes
PARG19385	247.457	1.78415	0.327135	37.5692	6.94951e-09	5.80221e-08	yes
PARG04116	1445.31	1.09565	0.209023	37.564	6.96766e-09	5.81444e-08	yes
PARG28597	2227.11	-0.651163	0.143746	37.5571	6.99174e-09	5.83161e-08
PARG16490	96.2908	1.59472	0.415655	37.5351	7.06894e-09	5.89303e-08	yes
PARG06472	334.032	-2.37551	0.413074	37.5303	7.08606e-09	5.90434e-08	yes
PARG28245	3070.17	-0.765768	0.14232	37.5273	7.09652e-09	5.91008e-08
PARG28154	207.367	-0.210755	0.133586	37.5219	7.11581e-09	5.92318e-08
PARG27674	757.259	-0.171688	0.192611	37.512	7.15107e-09	5.94955e-08
PARG03989	39.8506	-2.01568	0.522699	37.505	7.17613e-09	5.96741e-08	yes
[truncated: 14,658 more rows]

## Sheet: DESeq2_LCR
gene_id	baseMean	log2FoldChange	lfcSE	stat	pvalue	padj	DEG
PARG00223	4161.7	15.7742	2.047	2649.42	0	0	yes
PARG05786	2989.98	12.8547	1.45132	2624.15	0	0	yes
PARG06673	1781.39	11.1044	1.03506	1835.01	0	0	yes
PARG06934	4808.2	15.9824	2.04624	2982.49	0	0	yes
PARG07247	2469.54	12.5767	1.45354	1979.46	0	0	yes
PARG11442	1179	8.50776	0.54239	1493.12	0	0	yes
PARG11743	2370.04	12.5192	1.45162	2376.74	0	0	yes
PARG14093	5942.09	13.845	1.454	2417.81	0	0	yes
PARG17821	5334.4	7.46881	0.223992	2585.81	0	0	yes
PARG18061	1277.84	14.0704	2.04871	1624.28	0	0	yes
PARG19418	1161.18	9.90255	0.852114	1570.74	0	0	yes
PARG20068	2341.91	9.49938	0.534823	2237.04	0	0	yes
PARG20646	1517.86	6.73601	0.297622	1638.29	0	0	yes
PARG22812	2798.17	4.35178	0.182243	1499.36	0	0	yes
PARG24515	3183.93	12.9447	1.45598	1893.65	0	0	yes
PARG24698	2874.81	12.7976	1.45297	2222	0	0	yes
PARG26534	6143.05	6.67409	0.205575	1904.95	0	0	yes
PARG27725	5319.89	9.68399	0.390688	3050.13	0	0	yes
PARG29399	1070.34	13.8145	2.0489	1502.93	0	0	yes
PARG19218	2895.62	-2.76467	0.196915	1426.07	2.15679916984058e-310	1.89604e-307	yes
PARG11664	1106.78	13.8628	2.05004	1402.68	2.58189e-305	2.16165e-302	yes
PARG12512	1256.11	11.6027	1.45832	1335.59	9.55573e-291	7.63677e-288	yes
PARG29362	1082.76	13.8323	2.05081	1313.15	7.14661e-286	5.46312e-283	yes
PARG27969	1213.97	7.28268	0.378688	1240.65	3.9509e-270	2.89436e-267	yes
PARG05387	765.321	13.3301	2.04991	1237.62	1.79473e-269	1.2622e-266	yes
PARG30359	1636.72	3.74606	0.18972	1201.27	1.40443e-261	9.49719e-259	yes
PARG17729	2759.28	6.60874	0.268173	1194.76	3.63168e-260	2.3649e-257	yes
PARG05628	1164.25	13.9368	2.05273	1182.94	1.34353e-257	8.4364e-255	yes
PARG05108	841.711	13.4668	2.05123	1170.68	6.17032e-255	3.74092e-252	yes
PARG19277	2237.1	-3.34373	0.232482	1169.56	1.0782e-254	6.31894e-252	yes
PARG12615	758.314	13.3176	2.05109	1168.78	1.59532e-254	9.04802e-252	yes
PARG07332	837.458	11.0161	1.4582	1148.64	3.77269e-250	2.07286e-247	yes
PARG11474	784.335	8.59703	0.676384	1147.69	6.04755e-250	3.22206e-247	yes
PARG07699	825.665	13.4374	2.05126	1133.62	6.86219e-247	3.54856e-244	yes
PARG20918	698.412	13.1984	2.0512	1118.43	1.36663e-243	6.86517e-241	yes
PARG19772	693.804	13.1877	2.05176	1061.72	2.82297e-231	1.37871e-228	yes
PARG22143	1054.6	11.3523	1.46426	1006.45	2.8346e-219	1.34697e-216	yes
PARG19348	15067.3	-1.40013	0.141253	1001.2	3.91325e-218	1.8106e-215	yes
PARG20854	588.975	8.92276	0.860047	988.813	1.91373e-215	8.62747e-213	yes
PARG14163	4007.01	3.15344	0.17759	984.313	1.81609e-214	7.98263e-212	yes
PARG20492	714.295	10.7887	1.46158	955.815	2.80231e-208	1.20171e-205	yes
PARG08426	1020.17	4.26483	0.233085	952.805	1.26202e-207	5.28304e-205	yes
PARG22160	512.684	12.7523	2.05275	919.404	2.25868e-200	9.23537e-198	yes
PARG27693	2040.28	2.32666	0.184686	913.275	4.83929e-199	1.93373e-196	yes
PARG19346	8914.25	-1.10087	0.174115	912.975	5.62298e-199	2.19696e-196	yes
PARG22248	754.623	5.36762	0.292383	887.252	2.16556e-193	8.27717e-191	yes
PARG05276	3321.55	-1.69975	0.162011	881.533	3.77981e-192	1.41397e-189	yes
PARG04442	847.715	6.24676	0.3462	874.587	1.21837e-190	4.4628e-188	yes
PARG06684	2057.48	-0.991659	0.199499	844.16	4.93116e-184	1.76938e-181	yes
PARG08231	689.792	5.751	0.332515	829.184	8.81226e-181	3.09874e-178	yes
PARG03330	8250.52	-0.353494	0.187038	828.458	1.26638e-180	4.36577e-178	yes
PARG19023	1466.45	-5.20086	0.186711	814.407	1.42455e-177	4.81661e-175	yes
PARG06642	1938.51	4.22492	0.219772	797.072	8.28167e-174	2.74733e-171	yes
PARG10107	2118.26	-2.41775	0.190528	796.23	1.26136e-173	4.10688e-171	yes
PARG07278	3968.48	4.98879	0.260058	790.026	2.80504e-172	8.96695e-170	yes
PARG18960	1859.63	1.06341	0.238552	788.689	5.47541e-172	1.71908e-169	yes
PARG08600	2570.87	-1.86693	0.17358	781.811	1.70553e-170	5.26083e-168	yes
PARG05866	6968.38	0.908923	0.145323	777.24	1.67655e-169	5.08227e-167	yes
PARG15180	3125.83	-1.3459	0.180512	754.717	1.30399e-164	3.88589e-162	yes
PARG22664	377.444	12.3119	2.05513	744.966	1.70916e-162	5.00841e-160	yes
PARG30407	1771.85	-0.85237	0.206317	725.225	3.30593e-158	9.52868e-156	yes
PARG12645	4723.1	-0.403834	0.149109	722.435	1.33425e-157	3.78367e-155	yes
PARG08377	1999.73	2.68099	0.177641	719.189	6.76225e-157	1.8872e-154	yes
PARG16248	367.341	12.2722	2.05561	712.255	2.16712e-155	5.95348e-153	yes
PARG05517	440.818	9.08877	1.05215	709.562	8.32745e-155	2.25251e-152	yes
PARG22450	2551.47	-0.829322	0.200731	700.964	6.13115e-153	1.6333e-150	yes
PARG18357	1085.9	3.4448	0.211675	698.015	2.6796e-152	7.03174e-150	yes
PARG24142	2321.61	-3.85676	0.165908	696.714	5.13518e-152	1.32775e-149	yes
PARG16143	1930.87	-0.418297	0.202827	696.639	5.33138e-152	1.3585e-149	yes
PARG07999	2257.6	-1.41776	0.219253	694.754	1.36775e-151	3.43539e-149	yes
PARG05669	3953.19	-0.155721	0.18729	693.504	2.55547e-151	6.3282e-149	yes
PARG28111	2317.48	1.66646	0.168854	686.593	8.09529e-150	1.97682e-147	yes
PARG24846	3038.18	1.57098	0.152138	684.199	2.67945e-149	6.45344e-147	yes
PARG25679	403.855	7.63111	0.688552	675.435	2.14349e-147	5.09282e-145	yes
PARG05368	2592.37	-2.12631	0.178132	672.033	1.1748e-146	2.75404e-144	yes
PARG08916	1181.25	3.72224	0.207622	656.184	3.24711e-143	7.51194e-141	yes
PARG04426	8104.2	-1.28063	0.155797	653.664	1.14436e-142	2.613e-140	yes
PARG11948	1646.97	1.78048	0.176599	635.746	8.90187e-139	2.00657e-136	yes
PARG15259	686.009	4.80951	0.291118	631.051	9.31213e-138	2.07248e-135	yes
PARG16036	2034.2	0.46097	0.230289	620.65	1.68914e-135	3.7123e-133	yes
PARG08230	1013.08	3.23718	0.201218	615.981	1.74381e-134	3.78515e-132	yes
PARG17991	433.069	-2.73351	0.529072	596.125	3.57395e-130	7.66308e-128	yes
PARG08146	8136.83	3.57349	0.169373	593.174	1.56314e-129	3.31121e-127	yes
PARG19692	447.942	-6.11094	0.30221	588.793	1.3968e-128	2.92363e-126	yes
PARG03191	3933	2.88813	0.204343	588.304	1.784e-128	3.69015e-126	yes
PARG04598	2770.53	1.37981	0.171433	585.588	6.93653e-128	1.41812e-125	yes
PARG21491	1454.72	-5.24667	0.252492	574.013	2.26292e-125	4.57318e-123	yes
PARG19723	760.519	9.28829	0.889881	572.664	4.44316e-125	8.87723e-123	yes
PARG29459	718.239	4.06272	0.254429	560.11	2.36393e-122	4.66995e-120	yes
PARG01475	612.371	-0.405442	0.308669	559.181	3.76137e-122	7.34805e-120	yes
PARG06683	5444.03	1.65298	0.148104	558.908	4.31116e-122	8.32954e-120	yes
PARG00513	423.055	5.03152	0.350902	557.931	7.02915e-122	1.34333e-119	yes
PARG16038	4580.39	0.502261	0.23076	553.947	5.15165e-121	9.73939e-119	yes
PARG11333	9911.35	-2.86256	0.138833	552.545	1.03868e-120	1.94278e-118	yes
PARG13914	13505.6	0.0977501	0.149051	547.909	1.05434e-119	1.9513e-117	yes
PARG27695	1243.62	1.21439	0.178192	541.441	2.67593e-118	4.90085e-116	yes
PARG20099	275.574	11.8544	2.05988	538.013	1.48554e-117	2.69266e-115	yes
PARG27350	668.455	0.175999	0.279556	534.558	8.36193e-117	1.5002e-114	yes
PARG05066	695.721	3.57057	0.461124	533.983	1.1143e-116	1.97895e-114	yes
PARG18426	1617.62	-3.72094	0.172054	526.19	5.48589e-115	9.64529e-113	yes
PARG03258	349.734	7.42082	0.702869	522.655	3.21255e-114	5.59238e-112	yes
PARG10354	499.505	0.847129	0.521487	521.304	6.31204e-114	1.08802e-111	yes
PARG28112	1375.76	1.69157	0.197033	520.254	1.06706e-113	1.82147e-111	yes
PARG07422	1270.74	0.958008	0.171779	515.564	1.11365e-112	1.88272e-110	yes
PARG06630	14023.6	-0.583235	0.141053	513.031	3.95051e-112	6.61503e-110	yes
PARG04388	1335.91	-4.51258	0.216657	507.605	5.95768e-111	9.88188e-109	yes
PARG30015	2414.89	0.885817	0.166101	506.921	8.38553e-111	1.37789e-108	yes
PARG29555	5611.41	-0.206864	0.161572	502.205	8.86494e-110	1.44318e-107	yes
PARG11947	2226.53	1.27426	0.171685	500.2	2.41551e-109	3.89629e-107	yes
PARG20645	269.059	8.36957	1.05764	499.333	3.72619e-109	5.9558e-107	yes
PARG23985	2355.49	0.567168	0.168698	495.175	2.97873e-108	4.7182e-106	yes
PARG23543	738.801	-0.559696	0.238037	491.222	2.15051e-107	3.37591e-105	yes
PARG26711	1816.25	0.487884	0.245766	485.338	4.07653e-106	6.3428e-104	yes
PARG09123	1937.42	2.34003	0.197172	481.357	2.98297e-105	4.60058e-103	yes
PARG14254	232.188	11.6102	2.06191	480.587	4.38386e-105	6.70235e-103	yes
PARG01451	681.209	3.81495	0.270743	480.484	4.61613e-105	6.99663e-103	yes
PARG05741	7480.9	-0.320647	0.155925	477.678	1.87749e-104	2.82138e-102	yes
PARG27617	3528.9	2.39505	0.160591	477.105	2.50041e-104	3.72562e-102	yes
PARG27803	5187.17	-3.75763	0.175985	472.685	2.27925e-103	3.36754e-101	yes
PARG15788	240.09	11.6519	2.06112	471.969	3.26085e-103	4.77769e-101	yes
PARG27418	1460.58	0.388398	0.212997	468.555	1.79717e-102	2.61139e-100	yes
PARG13088	2742.7	0.528287	0.165959	468.059	2.30255e-102	3.31831e-100	yes
PARG16777	2594.18	1.45971	0.176754	467.857	2.54762e-102	3.64164e-100	yes
PARG06919	296.974	11.9635	2.06742	461.202	7.09869e-101	1.00653e-98	yes
PARG08591	5572.39	-2.69612	0.17147	458.296	3.03547e-100	4.26956e-98	yes
PARG11381	597.729	-1.47816	0.265023	453.339	3.61985e-99	5.05113e-97	yes
PARG18248	1073.74	-3.88451	0.220668	449.904	2.0163e-98	2.79139e-96	yes
PARG03795	672.192	-4.46493	0.220031	449.474	2.50066e-98	3.43489e-96	yes
PARG14175	207.502	11.448	2.06374	446.332	1.20299e-97	1.63961e-95	yes
PARG29417	13202.7	-3.59223	0.18715	445.33	1.98547e-97	2.68528e-95	yes
PARG10875	938.079	3.05157	0.24278	444.989	2.35454e-97	3.16012e-95	yes
PARG24749	13111.1	0.244604	0.186801	441.061	1.67848e-96	2.23568e-94	yes
PARG22962	16047.8	-0.472925	0.203796	439.352	3.94401e-96	5.2138e-94	yes
PARG03568	21039.3	-4.39035	0.209009	439.336	3.97628e-96	5.21724e-94	yes
PARG06094	8681.25	0.42656	0.145071	438.914	4.90879e-96	6.39306e-94	yes
PARG03262	752.688	1.49332	0.205865	437.76	8.74035e-96	1.12995e-93	yes
PARG02007	3236.04	-2.32321	0.169257	435.92	2.19356e-95	2.81513e-93	yes
PARG22156	249.343	9.27215	1.47992	434.099	5.4534e-95	6.94795e-93	yes
PARG03033	213.184	9.03822	1.47452	428.972	7.07646e-94	8.95095e-92	yes
PARG14722	559.015	6.23964	0.464086	427.278	1.65143e-93	2.07396e-91	yes
PARG17994	1077.98	0.344349	0.298608	421.621	2.79419e-92	3.48422e-90	yes
PARG23166	1275.37	1.65736	0.195726	421.527	2.9287e-92	3.62623e-90	yes
PARG06923	867.79	1.78153	0.287742	419.134	9.68808e-92	1.19116e-89	yes
PARG05638	265.716	5.88316	0.52944	408.797	1.70164e-89	2.07765e-87	yes
PARG08536	654.538	-2.63171	0.236168	408.408	2.0672e-89	2.50658e-87	yes
PARG19713	2073.86	-0.62251	0.216024	404.262	1.64309e-88	1.97868e-86	yes
PARG23594	2430.81	-0.958419	0.159003	402.51	3.9449e-88	4.71831e-86	yes
PARG08611	5806.2	-0.246465	0.171107	401.721	5.85367e-88	6.954e-86	yes
PARG00635	1992.43	2.64342	0.219776	400.495	1.08034e-87	1.27481e-85	yes
PARG17928	5809.56	-0.7346	0.160318	399.452	1.82011e-87	2.13341e-85	yes
PARG07124	408.534	6.14785	0.49802	396.627	7.4727e-87	8.701e-85	yes
PARG17730	2576.9	2.2706	0.176545	396.492	7.99768e-87	9.251e-85	yes
PARG12804	4873.49	0.224589	0.192317	396.165	9.41568e-87	1.082e-84	yes
PARG08215	503.149	3.92065	0.306037	394.206	2.50736e-86	2.86263e-84	yes
PARG08362	2074.37	-0.542378	0.20196	393.586	3.41905e-86	3.87831e-84	yes
PARG21794	12329.3	-1.72083	0.130672	392.454	6.02105e-86	6.78603e-84	yes
PARG30213	656.664	1.18233	0.209307	392.196	6.85089e-86	7.67213e-84	yes
PARG02825	2551.39	-2.45168	0.186479	389.662	2.43231e-85	2.70664e-83	yes
PARG24732	237.513	6.17267	0.588475	389.291	2.9278e-85	3.23752e-83	yes
PARG22187	3793.71	-0.407741	0.171218	388.25	4.92589e-85	5.41294e-83	yes
PARG14192	177.352	11.2213	2.06715	386.201	1.3725e-84	1.49884e-82	yes
PARG01733	1581.85	0.247633	0.26377	386.152	1.40642e-84	1.5264e-82	yes
PARG10639	1559.28	1.62189	0.166468	383.859	4.42697e-84	4.77515e-82	yes
PARG15526	1228.15	-1.22904	0.17926	383.109	6.44145e-84	6.90571e-82	yes
PARG26804	209.023	7.41088	0.886434	382.676	7.99823e-84	8.52272e-82	yes
PARG22103	192.546	7.8868	1.06742	378.48	6.51956e-83	6.90523e-81	yes
PARG06111	1732.12	-0.516804	0.165957	376.337	1.90282e-82	2.00331e-80	yes
PARG20914	344.448	-3.28622	0.374316	374.883	3.93746e-82	4.12074e-80	yes
PARG18122	2303.45	-0.502488	0.164689	373.818	6.70737e-82	6.97805e-80	yes
PARG19061	10401.2	0.155426	0.132776	372.964	1.02799e-81	1.06318e-79	yes
PARG25199	11488.1	-0.0122133	0.132494	369.426	6.02734e-81	6.19724e-79	yes
PARG29240	2914.55	-1.95106	0.183666	368.799	8.24652e-81	8.42967e-79	yes
PARG26413	6534.64	-0.43419	0.164532	365.199	4.98985e-80	5.07119e-78	yes
PARG11254	393.519	3.68216	0.31486	365.043	5.39481e-80	5.45124e-78	yes
PARG24816	376.362	12.309	2.08158	361.73	2.82635e-79	2.83959e-77	yes
PARG27323	1993.29	-2.69625	0.157682	360.903	4.2737e-79	4.26933e-77	yes
PARG13949	2154.57	1.16789	0.156606	359.715	7.74428e-79	7.69265e-77	yes
PARG11521	1582.14	-0.0716757	0.193551	359.325	9.41112e-79	9.29586e-77	yes
PARG08589	507.25	-0.686554	0.458509	359.056	1.07664e-78	1.05751e-76	yes
PARG01511	3789.17	3.17926	0.204567	358.068	1.76434e-78	1.72337e-76	yes
PARG14659	525.17	1.5443	0.227944	353.576	1.66711e-77	1.6194e-75	yes
PARG12187	4333.19	-2.96078	0.166128	353.558	1.68206e-77	1.62495e-75	yes
PARG08108	411.557	9.99371	1.50144	352.925	2.30887e-77	2.21828e-75	yes
PARG19243	197.859	6.59952	0.722315	348.53	2.07793e-76	1.98555e-74	yes
PARG04387	2919.99	-1.57515	0.201312	347.776	3.03005e-76	2.87969e-74	yes
PARG07442	3658.98	0.62862	0.180307	347.029	4.40127e-76	4.16038e-74	yes
PARG22141	162.853	11.0982	2.06942	346.511	5.70158e-76	5.36071e-74	yes
PARG06777	2897.83	-0.393675	0.164394	346.369	6.12104e-76	5.72448e-74	yes
PARG02925	3285.36	-0.264999	0.183201	343.761	2.25532e-75	2.09804e-73	yes
PARG12315	1267.5	-0.589767	0.233187	342.735	3.76811e-75	3.48689e-73	yes
PARG22817	1167.32	0.713717	0.178156	342.413	4.42646e-75	4.07466e-73	yes
PARG19753	457.255	1.78213	0.241804	341.937	5.61361e-75	5.14055e-73	yes
PARG05590	2423.06	1.50074	0.156215	341.58	6.71103e-75	6.11365e-73	yes
PARG27599	23213.5	-1.26225	0.166052	340.914	9.36425e-75	8.48671e-73	yes
PARG10686	3665.93	-0.537831	0.145888	339.684	1.73246e-74	1.56206e-72	yes
PARG10465	6857.79	1.18244	0.138863	339.255	2.14692e-74	1.92587e-72	yes
PARG26862	4156.8	-0.400333	0.149148	339.057	2.37015e-74	2.11533e-72	yes
PARG07104	2704.96	1.41626	0.147562	338.734	2.78533e-74	2.47331e-72	yes
PARG25942	461.54	5.13692	0.363598	338.268	3.5155e-74	3.106e-72	yes
PARG01239	1691.95	-0.975698	0.164049	338.249	3.54965e-74	3.1205e-72	yes
PARG20561	1664.37	0.71995	0.183593	337.598	4.91515e-74	4.29941e-72	yes
PARG21074	1617.23	1.73475	0.196623	337.437	5.32792e-74	4.6374e-72	yes
PARG10046	643.958	1.5192	0.228199	336.351	9.16969e-74	7.94194e-72	yes
PARG25946	531.918	4.53049	0.303382	335.99	1.09825e-73	9.46541e-72	yes
PARG24578	414.699	-0.39934	0.312172	335.803	1.20564e-73	1.03403e-71	yes
PARG11861	11103.5	-0.894034	0.156229	335.416	1.46314e-73	1.24878e-71	yes
PARG08067	277.737	-7.22279	1.40647	334.141	2.76871e-73	2.35166e-71	yes
PARG30099	12244.4	1.6697	0.133493	333.174	4.49025e-73	3.79555e-71	yes
PARG12451	5742.6	-2.18903	0.15109	332.563	6.09475e-73	5.12717e-71	yes
PARG08614	224.378	5.36866	0.499692	331.433	1.07203e-72	8.93287e-71	yes
PARG29760	529.218	-1.28307	0.334258	331.439	1.06886e-72	8.93287e-71	yes
PARG03674	491.021	3.8765	0.292445	329.92	2.28444e-72	1.89458e-70	yes
PARG24946	1305.29	4.94759	0.342753	329.761	2.47368e-72	2.04189e-70	yes
PARG27966	1195.68	-0.172626	0.199324	329.604	2.67512e-72	2.19785e-70	yes
PARG21633	3724.07	2.09632	0.201452	328.513	4.61758e-72	3.7761e-70	yes
PARG11339	497.789	4.16764	0.320495	327.642	7.13538e-72	5.80807e-70	yes
PARG14232	632.371	-3.37116	0.288658	327.505	7.64182e-72	6.19163e-70	yes
PARG04601	1184.5	1.33863	0.227427	326.621	1.1889e-71	9.5886e-70	yes
PARG06669	4631.76	2.27077	0.170985	325.146	2.48627e-71	1.99605e-69	yes
PARG23846	4560.97	0.503154	0.138756	325.017	2.65071e-71	2.1184e-69	yes
PARG08592	1451.03	-2.52343	0.213152	324.64	3.20105e-71	2.54665e-69	yes
PARG04156	3705.64	-2.19599	0.142806	324.355	3.69233e-71	2.92426e-69	yes
PARG08347	2726.63	-0.984356	0.196397	324.056	4.28744e-71	3.38035e-69	yes
PARG20581	433.669	1.38399	0.258046	322.122	1.12746e-70	8.84952e-69	yes
PARG10988	383.069	3.50881	0.285726	321.264	1.7318e-70	1.35327e-68	yes
PARG15193	2593.28	0.974586	0.166386	319.975	3.29915e-70	2.56662e-68	yes
PARG27337	527.197	1.32597	0.229445	319.135	5.02095e-70	3.88891e-68	yes
PARG00581	1497.36	-0.555328	0.178774	318.465	7.01707e-70	5.41114e-68	yes
PARG27268	1503.65	-4.18063	0.248282	318.177	8.10644e-70	6.2239e-68	yes
PARG20439	303.863	-5.27437	0.455203	317.458	1.16095e-69	8.87473e-68	yes
PARG19439	141.399	10.8948	2.07232	317.224	1.30547e-69	9.9363e-68	yes
PARG19622	473.968	2.23567	0.243327	316.341	2.02941e-69	1.53798e-67	yes
PARG20159	265.398	0.888452	0.492023	316.124	2.26216e-69	1.70701e-67	yes
PARG27690	10218.5	0.0202683	0.16352	315.342	3.34495e-69	2.51329e-67	yes
PARG03204	217.274	6.23482	0.637578	314.582	4.891e-69	3.6593e-67	yes
PARG17976	170.251	7.69716	1.07217	314.567	4.92839e-69	3.67165e-67	yes
PARG23726	3925.39	2.87869	0.207468	313.949	6.7109e-69	4.97853e-67	yes
PARG10872	7350.42	-0.353686	0.200686	313.784	7.29016e-69	5.38553e-67	yes
PARG19395	4855.06	1.48314	0.161554	312.871	1.15071e-68	8.4652e-67	yes
PARG01859	3660.9	-1.57195	0.227036	311.888	1.88126e-68	1.37818e-66	yes
PARG01533	2584.31	1.31679	0.177014	311.696	2.07e-68	1.51015e-66	yes
PARG00843	3356.59	-0.459268	0.166528	309.377	6.60225e-68	4.79673e-66	yes
PARG18447	2751.87	-0.365086	0.169327	308.985	8.03169e-68	5.81124e-66	yes
PARG12725	654.158	0.835925	0.204661	306.38	2.95417e-67	2.1287e-65	yes
PARG07757	622.146	1.67467	0.220535	305.933	3.69366e-67	2.65069e-65	yes
PARG23869	501.515	1.41619	0.226933	305.893	3.76829e-67	2.69325e-65	yes
PARG18110	2969.67	1.36554	0.149382	305.342	4.96444e-67	3.5338e-65	yes
PARG05219	3981.18	-0.0537892	0.148487	305.015	5.84536e-67	4.14408e-65	yes
PARG07279	867.703	-3.74395	0.222178	304.53	7.44926e-67	5.25995e-65	yes
PARG00880	344.574	0.785543	0.351435	304.442	7.7855e-67	5.47539e-65	yes
PARG22658	3642.46	1.2198	0.203159	304.162	8.95704e-67	6.27421e-65	yes
PARG02183	3340.38	-0.485582	0.186388	303.737	1.1076e-66	7.72771e-65	yes
PARG04597	1062.72	2.56625	0.234694	303.596	1.18827e-66	8.25359e-65	yes
PARG20941	4835.36	-0.334686	0.170391	303.589	1.19236e-66	8.25359e-65	yes
PARG00606	2523.16	-0.814626	0.15305	303.35	1.34423e-66	9.26834e-65	yes
PARG23242	2334.97	-0.385376	0.152693	302.879	1.70066e-66	1.16801e-64	yes
PARG14649	3521.69	-0.906203	0.146509	301.894	2.78387e-66	1.90451e-64	yes
PARG01380	6541.18	-0.260998	0.147358	301.695	3.07438e-66	2.0951e-64	yes
PARG13060	948.223	-2.68394	0.210486	300.974	4.40875e-66	2.99284e-64	yes
PARG19944	7058.9	-0.763575	0.175807	300.615	5.27474e-66	3.56694e-64	yes
PARG24982	30498.9	-0.411092	0.13143	299.223	1.05802e-65	7.12725e-64	yes
PARG23892	304.746	2.47307	0.692275	297.519	2.4802e-65	1.66439e-63	yes
PARG08596	14167.9	-0.0562219	0.129577	297.111	3.04177e-65	2.03347e-63	yes
PARG05807	2788.67	-0.523626	0.157085	295.959	5.41218e-65	3.60443e-63	yes
PARG27984	1308.52	1.99955	0.173868	295.477	6.88487e-65	4.56792e-63	yes
PARG23724	5806.25	0.0401635	0.139762	295.405	7.13702e-65	4.71741e-63	yes
PARG10525	3234.96	-0.793292	0.235783	294.016	1.42999e-64	9.41649e-63	yes
PARG11902	295.303	-6.23315	0.40242	291.393	5.30601e-64	3.48098e-62	yes
PARG25941	374.353	5.63302	0.449512	291.068	6.24336e-64	4.0807e-62	yes
PARG12207	236.312	-3.75737	0.453896	290.225	9.5156e-64	6.19641e-62	yes
PARG18358	1565.51	1.46476	0.169872	289.263	1.53915e-63	9.98572e-62	yes
PARG13051	2531.71	-0.308868	0.183759	289.191	1.59602e-63	1.03166e-61	yes
PARG12448	872.998	3.37155	0.279866	289.089	1.67917e-63	1.08144e-61	yes
PARG02835	1564.31	-2.6901	0.164653	289.04	1.72055e-63	1.10404e-61	yes
PARG18979	778.165	1.62266	0.260278	288.895	1.85039e-63	1.18304e-61	yes
PARG21579	1182.03	1.53291	0.173423	288.382	2.39091e-63	1.52308e-61	yes
PARG29355	499.681	2.47707	0.238941	288.18	2.64542e-63	1.67913e-61	yes
PARG06799	450.239	-4.2348	0.261541	287.964	2.94749e-63	1.86413e-61	yes
PARG03742	616.474	2.1808	0.216056	287.822	3.16395e-63	1.99386e-61	yes
PARG12159	3244.53	0.756998	0.147035	287.553	3.61895e-63	2.27244e-61	yes
PARG20212	793.081	-1.86449	0.202521	287.168	4.38862e-63	2.74593e-61	yes
PARG25895	1778.14	-2.33891	0.231247	284.283	1.85648e-62	1.15747e-60	yes
PARG10303	2841.28	0.301377	0.224639	284.112	2.02223e-62	1.25635e-60	yes
PARG27891	1969.12	1.69287	0.156353	283.396	2.89306e-62	1.79105e-60	yes
PARG13684	3404.23	-1.76533	0.285588	283.139	3.28923e-62	2.02917e-60	yes
PARG05929	339.535	5.58624	0.499671	281.645	6.94273e-62	4.26808e-60	yes
PARG02979	763.99	2.98646	0.285738	281.593	7.12719e-62	4.36621e-60	yes
PARG19347	365.521	-0.690574	0.309067	281.188	8.72413e-62	5.32596e-60	yes
PARG19060	42014.4	0.0124624	0.152969	281.049	9.35537e-62	5.69156e-60	yes
PARG10062	1329.85	1.97029	0.188895	280.516	1.22102e-61	7.40278e-60	yes
PARG25095	131.51	8.34212	1.49057	279.974	1.60075e-61	9.67163e-60	yes
PARG12761	2976.74	1.60884	0.154333	279.493	2.03596e-61	1.2259e-59	yes
PARG04591	606.364	1.17554	0.287071	278.787	2.89781e-61	1.73888e-59	yes
PARG24153	145.256	6.47493	0.805305	276.855	7.61724e-61	4.55531e-59	yes
PARG27751	960.018	0.718244	0.200166	275.821	1.27695e-60	7.61062e-59	yes
PARG24574	865.349	-2.15247	0.236237	275.439	1.54565e-60	9.18094e-59	yes
PARG22776	792.66	2.54817	0.255674	274.256	2.79343e-60	1.65367e-58	yes
PARG00758	1930.52	-0.183857	0.215521	272.675	6.15563e-60	3.63182e-58	yes
PARG06237	4549.46	1.48051	0.192683	271.597	1.05564e-59	6.20745e-58	yes
PARG00019	855.237	1.31513	0.191769	270.457	1.86597e-59	1.09358e-57	yes
PARG25383	2949.58	1.05874	0.170561	270.396	1.92382e-59	1.12374e-57	yes
PARG11881	1585.85	1.55649	0.163989	270.266	2.05368e-59	1.19562e-57	yes
PARG13592	1351.99	-1.05038	0.243979	270.001	2.34431e-59	1.36032e-57	yes
PARG14234	558.532	-3.77658	0.354217	269.684	2.74677e-59	1.58861e-57	yes
PARG20883	1234.4	1.15384	0.223578	269.238	3.4338e-59	1.97944e-57	yes
PARG25192	9878.84	-1.1646	0.219728	268.52	4.91568e-59	2.82443e-57	yes
PARG06423	1097.9	2.18247	0.209525	267.542	8.01492e-59	4.59017e-57	yes
PARG23754	373.79	1.41132	0.256681	267.464	8.33481e-59	4.75788e-57	yes
PARG15330	2511.69	1.84461	0.149975	267.334	8.89719e-59	5.06247e-57	yes
PARG23120	139.592	10.8691	2.07847	267.231	9.36603e-59	5.31205e-57	yes
PARG17420	129.044	10.753	2.07455	267.211	9.46133e-59	5.34884e-57	yes
PARG23933	2621.5	-1.53487	0.216368	267.075	1.01246e-58	5.70549e-57	yes
PARG11928	452.016	3.40268	0.309769	266.847	1.13486e-58	6.36678e-57	yes
PARG12532	4073.61	-0.0233143	0.178444	266.843	1.13705e-58	6.36678e-57	yes
PARG08000	763.376	0.0763905	0.23971	266.828	1.14546e-58	6.39348e-57	yes
PARG27355	2732.25	-1.50923	0.176149	266.688	1.22849e-58	6.83524e-57	yes
PARG11828	513.157	0.848157	0.328706	266.349	1.4557e-58	8.07383e-57	yes
PARG18005	293.073	-1.00324	0.330748	265.813	1.90272e-58	1.052e-56	yes
PARG07261	990.085	0.690033	0.26746	265.496	2.2303e-58	1.22925e-56	yes
PARG15364	1024.4	-1.88324	0.206154	265.22	2.56015e-58	1.40664e-56	yes
PARG10671	197.747	11.3758	2.08462	265.078	2.74885e-58	1.50562e-56	yes
PARG06791	725.283	2.05875	0.203765	264.552	3.5749e-58	1.95199e-56	yes
PARG24156	171.577	6.68715	0.797465	264.367	3.9222e-58	2.13499e-56	yes
PARG24772	877.601	0.457656	0.189899	263.319	6.62236e-58	3.59365e-56	yes
PARG01757	3838.97	1.22009	0.15007	263.115	7.33371e-58	3.96742e-56	yes
PARG15445	258.064	3.06358	0.322118	262.949	7.96671e-58	4.29665e-56	yes
PARG08190	707.311	3.48246	0.26295	262.023	1.26625e-57	6.80835e-56	yes
PARG02736	1697.7	2.36385	0.163913	260.57	2.6179e-57	1.40329e-55	yes
PARG00453	1405.88	1.43596	0.165844	260.242	3.08419e-57	1.64821e-55	yes
PARG12715	1082.19	2.33316	0.194663	260.107	3.30032e-57	1.75837e-55	yes
PARG24030	1567.65	-0.676505	0.200111	260.048	3.39816e-57	1.80503e-55	yes
PARG02057	1445.22	-0.434449	0.182323	259.279	4.99208e-57	2.6437e-55	yes
PARG13878	7495.91	0.964484	0.138944	259.236	5.09935e-57	2.69239e-55	yes
PARG15534	1088.17	0.375816	0.179936	258.99	5.76813e-57	3.03638e-55	yes
PARG29281	785.061	-2.8259	0.211558	258.288	8.19318e-57	4.30008e-55	yes
PARG29273	423.928	1.86631	0.261276	258.175	8.66918e-57	4.53635e-55	yes
PARG13517	28747.9	-0.464836	0.183106	258.153	8.76757e-57	4.57423e-55	yes
PARG10518	2186.87	-1.06787	0.210237	257.928	9.80881e-57	5.10232e-55	yes
PARG27305	125.94	8.27686	1.49228	256.879	1.65713e-56	8.59461e-55	yes
PARG04594	517.147	1.86767	0.326248	256.547	1.95661e-56	1.01082e-54	yes
PARG20520	685.673	-0.376205	0.250849	256.543	1.96047e-56	1.01082e-54	yes
PARG24550	1427.91	1.61729	0.193902	256.404	2.10142e-56	1.08033e-54	yes
PARG15665	242.865	4.49766	0.423015	256.211	2.31427e-56	1.18628e-54	yes
PARG19431	490.663	-3.3357	0.318841	256.059	2.49785e-56	1.27666e-54	yes
PARG20857	5185.38	0.549795	0.138875	255.787	2.86075e-56	1.4579e-54	yes
PARG00161	497.603	1.21825	0.231143	254.013	6.9474e-56	3.53032e-54	yes
PARG28088	2773.54	-0.100705	0.216902	252.45	1.51756e-55	7.68928e-54	yes
PARG21286	5896.12	-1.83206	0.143007	252.339	1.60407e-55	8.10423e-54	yes
PARG19104	144.043	10.9231	2.08458	251.926	1.97215e-55	9.93532e-54	yes
PARG08105	589.499	4.12441	0.407903	251.601	2.32061e-55	1.16574e-53	yes
PARG27499	1908.5	-0.33293	0.176565	250.959	3.19909e-55	1.60246e-53	yes
PARG28089	2741.83	-0.100476	0.218224	249.604	6.29745e-55	3.1455e-53	yes
PARG00284	872.382	0.428375	0.201529	249.16	7.86291e-55	3.91631e-53	yes
PARG06694	266.341	-1.59067	0.420468	248.823	9.3065e-55	4.62223e-53	yes
PARG24081	554.343	1.22448	0.282814	248.789	9.46795e-55	4.68917e-53	yes
PARG29550	1995.57	-1.04327	0.307716	248.732	9.74028e-55	4.8105e-53	yes
PARG22725	4494.73	0.220492	0.1434	247.886	1.48706e-54	7.32367e-53	yes
PARG24170	115.67	10.6003	2.07867	247.252	2.04108e-54	1.00241e-52	yes
PARG29732	881.678	1.82664	0.198249	246.812	2.54347e-54	1.24566e-52	yes
PARG23649	113.895	10.5855	2.08246	246.185	3.48062e-54	1.6999e-52	yes
PARG10582	1545.99	-2.02316	0.159908	245.992	3.83305e-54	1.86683e-52	yes
PARG24010	7330.48	1.56343	0.152308	245.596	4.6715e-54	2.26891e-52	yes
PARG14053	4920.99	-0.612709	0.142257	245.485	4.93947e-54	2.39245e-52	yes
PARG19938	147.691	10.9274	2.07541	245.357	5.26581e-54	2.5435e-52	yes
PARG24199	624.241	2.14104	0.249754	245.206	5.67671e-54	2.73446e-52	yes
PARG08253	393.047	2.80573	0.3372	244.597	7.69999e-54	3.69894e-52	yes
PARG04363	20383.2	-0.567588	0.16186	244.014	1.03027e-53	4.93574e-52	yes
PARG20536	2537.01	-2.21222	0.149587	243.907	1.08702e-53	5.19349e-52	yes
PARG07872	570.132	1.06824	0.233724	243.527	1.31448e-53	6.26319e-52	yes
PARG19996	1040.77	-0.13719	0.194084	243.345	1.43995e-53	6.8425e-52	yes
PARG15447	345.788	1.21503	0.26396	242.28	2.45269e-53	1.16235e-51	yes
PARG12287	3543.49	-3.15782	0.231031	241.641	3.37483e-53	1.59506e-51	yes
PARG18737	37077.3	0.0630767	0.161408	240.778	5.19622e-53	2.44933e-51	yes
PARG27596	108.046	10.5036	2.08033	240.297	6.60822e-53	3.10657e-51	yes
PARG20093	530.027	2.60213	0.282932	239.182	1.15399e-52	5.41054e-51	yes
PARG21287	13787.2	-1.72085	0.140037	238.794	1.40138e-52	6.55296e-51	yes
PARG27129	5206.41	0.752971	0.135133	238.635	1.51702e-52	7.07485e-51	yes
PARG21127	149.933	10.9812	2.08934	238.529	1.60025e-52	7.44328e-51	yes
PARG02701	2089.92	1.1418	0.154055	238.133	1.95023e-52	9.04721e-51	yes
PARG07135	140.545	5.40677	0.625885	237.987	2.09753e-52	9.70492e-51	yes
PARG27584	523.885	2.71856	0.238319	237.706	2.4149e-52	1.1144e-50	yes
PARG01345	3357.7	0.0323552	0.170264	237.532	2.63334e-52	1.21203e-50	yes
PARG14136	913.079	0.07319	0.198294	237.403	2.80975e-52	1.28984e-50	yes
PARG27449	354.528	1.54933	0.262341	237.176	3.14662e-52	1.44072e-50	yes
PARG12555	167.285	11.1394	2.09259	236.933	3.55358e-52	1.62283e-50	yes
PARG27269	42928.6	-2.21435	0.169442	236.56	4.28127e-52	1.95008e-50	yes
PARG19209	265.094	1.78218	0.297578	235.392	7.67905e-52	3.48871e-50	yes
PARG23479	523.715	0.965691	0.225556	235.14	8.70941e-52	3.94662e-50	yes
PARG23927	2085.05	1.32659	0.161071	234.696	1.08722e-51	4.914e-50	yes
PARG00327	1064.63	-0.458541	0.192733	234.603	1.13939e-51	5.13661e-50	yes
PARG19595	4080.07	-0.0180943	0.162657	233.087	2.43056e-51	1.09294e-49	yes
PARG02820	14325.3	1.63262	0.13168	232.492	3.27385e-51	1.46839e-49	yes
PARG24324	5227.03	-0.725595	0.149352	232.473	3.30399e-51	1.47814e-49	yes
PARG07069	45512	-0.0482883	0.129876	231.638	5.01782e-51	2.23917e-49	yes
PARG03555	759.172	2.24702	0.22295	231.521	5.31926e-51	2.36768e-49	yes
PARG08340	299.387	4.18881	0.355211	231.214	6.20093e-51	2.75315e-49	yes
PARG21037	583.34	-1.61145	0.220267	230.739	7.86251e-51	3.48208e-49	yes
PARG08481	606.04	-2.95397	0.209672	230.42	9.22563e-51	4.0755e-49	yes
PARG12281	16518.2	0.961551	0.128109	229.911	1.18989e-50	5.23365e-49	yes
PARG16094	442.048	1.92769	0.306493	229.909	1.19068e-50	5.23365e-49	yes
PARG29344	394.523	0.828069	0.244175	229.526	1.44257e-50	6.32502e-49	yes
PARG12154	127.78	8.29177	1.50017	228.895	1.97699e-50	8.64662e-49	yes
PARG22676	299.262	2.35459	0.289036	228.888	1.98401e-50	8.6558e-49	yes
PARG12930	23249.2	-2.15282	0.172492	228.865	2.00729e-50	8.73568e-49	yes
PARG14381	549.065	-1.12665	0.277438	228.679	2.20339e-50	9.56543e-49	yes
PARG25239	642.238	2.84858	0.281992	228.382	2.5554e-50	1.10662e-48	yes
PARG08385	899.72	-0.449323	0.29456	228.195	2.80564e-50	1.21201e-48	yes
PARG10352	158.243	1.38991	0.980949	227.545	3.8829e-50	1.67326e-48	yes
PARG26650	4224.38	1.14077	0.150545	227.452	4.06904e-50	1.74919e-48	yes
PARG22316	112.295	10.5543	2.0831	227.368	4.2431e-50	1.81957e-48	yes
PARG08672	396.481	2.87399	0.31352	227.336	4.31233e-50	1.84475e-48	yes
PARG06340	98.6774	10.3764	2.08408	227.235	4.53432e-50	1.93501e-48	yes
PARG02244	10494.5	-0.446492	0.12975	227.091	4.87256e-50	2.07432e-48	yes
PARG02887	159.905	4.97409	0.535841	226.944	5.24366e-50	2.22691e-48	yes
PARG26911	121.418	8.21042	1.49385	226.415	6.83183e-50	2.89439e-48	yes
PARG12205	4532.98	0.060309	0.15903	226.106	7.97557e-50	3.37083e-48	yes
PARG06497	2187.31	0.104975	0.160528	225.837	9.12328e-50	3.84665e-48	yes
PARG12774	3122.79	-0.819217	0.24473	225.701	9.76397e-50	4.10694e-48	yes
PARG14233	222.082	-3.37906	0.318162	225.497	1.08123e-49	4.53703e-48	yes
PARG13104	1176.36	-0.493736	0.19885	225.344	1.16747e-49	4.88725e-48	yes
PARG24393	2579.06	0.163846	0.155355	223.369	3.1338e-49	1.30875e-47	yes
PARG19509	740.429	0.486344	0.255638	222.836	4.09148e-49	1.70465e-47	yes
PARG27270	29698.5	-2.22714	0.176039	222.509	4.81708e-49	2.00222e-47	yes
PARG14598	3101.03	1.00667	0.154441	221.891	6.56089e-49	2.7206e-47	yes
PARG02678	121.37	10.6757	2.08903	221.801	6.86336e-49	2.83933e-47	yes
PARG06628	7470.26	-0.749699	0.189012	221.675	7.31021e-49	3.01709e-47	yes
PARG29721	2634.33	-0.153601	0.234839	221.263	8.98129e-49	3.6981e-47	yes
PARG07161	3390.23	-1.74827	0.157854	220.918	1.06749e-48	4.3852e-47	yes
PARG08334	532.478	0.289796	0.220087	220.636	1.22907e-48	5.03717e-47	yes
PARG10702	137.665	4.91239	0.575246	220.489	1.32234e-48	5.40683e-47	yes
PARG05845	2763.74	-0.0858831	0.156279	220.483	1.32634e-48	5.41061e-47	yes
PARG12073	3040.81	1.52845	0.156951	220.086	1.61823e-48	6.58606e-47	yes
PARG28181	8405.76	-1.93004	0.13849	219.743	1.9208e-48	7.79941e-47	yes
PARG00243	140.585	5.06641	0.577062	219.464	2.20838e-48	8.94649e-47	yes
PARG12799	250.573	-4.64502	0.331221	219.409	2.26965e-48	9.15252e-47	yes
PARG21503	1456.3	-0.115942	0.178035	219.413	2.26529e-48	9.15252e-47	yes
PARG02218	4840.52	1.07904	0.149255	219.354	2.33303e-48	9.38658e-47	yes
PARG17110	22626.1	-1.80644	0.128974	219.138	2.59886e-48	1.04322e-46	yes
PARG07394	108.371	1.77004	1.58117	219.046	2.7215e-48	1.08996e-46	yes
PARG26578	897.911	1.2883	0.224817	218.98	2.81269e-48	1.12392e-46	yes
PARG25800	18291.6	-0.653919	0.146312	218.749	3.15675e-48	1.25855e-46	yes
PARG20408	3570.13	1.76664	0.145819	218.643	3.32922e-48	1.32431e-46	yes
PARG02849	6954.74	-0.236542	0.147197	218.565	3.4603e-48	1.37334e-46	yes
PARG19842	1258.73	1.27817	0.173723	217.913	4.79622e-48	1.89926e-46	yes
PARG23762	3971.12	-0.544384	0.160348	217.039	7.4244e-48	2.93339e-46	yes
PARG24247	1030.27	1.98024	0.195484	216.509	9.67513e-48	3.81408e-46	yes
PARG17710	1131.1	-2.68986	0.20074	216.206	1.12576e-47	4.428e-46	yes
PARG20183	1629.65	0.778175	0.165578	216.058	1.21229e-47	4.75771e-46	yes
PARG23986	1333.43	-0.0299434	0.1823	215.763	1.40499e-47	5.48944e-46	yes
PARG26463	689.035	2.24014	0.216537	215.766	1.40261e-47	5.48944e-46	yes
PARG02445	1746.68	-0.1388	0.160976	215.595	1.52826e-47	5.95785e-46	yes
PARG17324	3220.76	-0.0915138	0.157627	214.135	3.17083e-47	1.2334e-45	yes
PARG14276	555.928	0.545989	0.277166	213.859	3.64092e-47	1.41313e-45	yes
PARG27904	617.891	1.30903	0.238964	213.28	4.86255e-47	1.88311e-45	yes
PARG06828	1399.32	0.767584	0.196678	212.907	5.85808e-47	2.26366e-45	yes
PARG09368	1282.76	0.676697	0.190754	212.55	7.00361e-47	2.70038e-45	yes
PARG10628	639.196	2.25103	0.253211	212.133	8.62964e-47	3.32005e-45	yes
PARG19328	1376.59	0.84104	0.175726	211.692	1.07537e-46	4.12822e-45	yes
PARG28179	511.94	1.40707	0.221558	211.152	1.40919e-46	5.39791e-45	yes
PARG25815	2277.46	0.993365	0.149912	211.075	1.46443e-46	5.59732e-45	yes
PARG23099	1726.7	-3.17784	0.225331	210.749	1.72382e-46	6.57447e-45	yes
PARG01015	13722	-1.84239	0.196402	210.556	1.89815e-46	7.22367e-45	yes
PARG10668	156.208	4.7464	0.548782	210.517	1.93555e-46	7.35008e-45	yes
PARG07997	2307.16	-1.86352	0.156851	210.407	2.04482e-46	7.74827e-45	yes
PARG23723	364.364	2.77557	0.280536	209.872	2.67283e-46	1.01062e-44	yes
PARG20656	15914.1	-1.17671	0.211478	209.698	2.91532e-46	1.09994e-44	yes
PARG06132	319.672	1.70019	0.281964	209.547	3.14423e-46	1.18377e-44	yes
PARG16531	233.177	2.52904	0.483018	208.81	4.544e-46	1.70711e-44	yes
PARG01181	616.493	-1.04913	0.226627	207.899	7.16751e-46	2.68698e-44	yes
PARG24545	1278.01	0.5618	0.177788	207.888	7.2073e-46	2.69614e-44	yes
PARG02059	6957.74	-0.526541	0.17706	207.822	7.44764e-46	2.78014e-44	yes
PARG12983	1112.71	-0.153454	0.181565	207.698	7.92415e-46	2.95175e-44	yes
PARG27713	253.795	-1.54595	0.605147	207.566	8.46507e-46	3.14657e-44	yes
PARG02152	2170.25	-1.99038	0.160535	207.401	9.19383e-46	3.41025e-44	yes
PARG20254	5247.07	-0.408436	0.138323	206.877	1.19484e-45	4.42267e-44	yes
PARG18856	172.04	-5.44137	0.421837	206.6	1.37222e-45	5.06857e-44	yes
PARG15232	2638.8	-0.917779	0.225964	206.295	1.59826e-45	5.8911e-44	yes
PARG18911	1223.96	1.44486	0.195381	206.148	1.72034e-45	6.32783e-44	yes
PARG12282	1437.6	-0.537334	0.170524	205.395	2.50585e-45	9.19789e-44	yes
PARG20318	418.909	1.07873	0.258653	204.737	3.48293e-45	1.27577e-43	yes
PARG04470	291.182	0.423992	0.457482	204.247	4.44925e-45	1.62634e-43	yes
PARG19091	565.721	-0.590146	0.4302	203.772	5.6439e-45	2.05874e-43	yes
PARG13320	18684.3	-0.358353	0.141443	203.585	6.19494e-45	2.25506e-43	yes
PARG22978	2078.71	1.12041	0.207498	203.244	7.34572e-45	2.66844e-43	yes
PARG04445	120.464	5.37862	0.671963	202.644	9.91953e-45	3.59598e-43	yes
PARG11889	2150.8	-1.28369	0.273155	202.604	1.01187e-44	3.66063e-43	yes
PARG25907	702.289	-1.32539	0.218712	202.436	1.10047e-44	3.97301e-43	yes
PARG10603	586.793	-1.19379	0.251387	201.032	2.22054e-44	8.0003e-43	yes
PARG14745	284.352	1.62652	0.30013	200.598	2.75922e-44	9.92077e-43	yes
PARG08956	6428.93	-1.64722	0.139284	200.549	2.82732e-44	1.01449e-42	yes
PARG29533	1896.77	2.2482	0.26912	200.302	3.19821e-44	1.14523e-42	yes
PARG19633	261.758	2.68784	0.329419	199.748	4.22062e-44	1.50827e-42	yes
PARG26047	841.68	1.41357	0.211928	199.736	4.24466e-44	1.51378e-42	yes
PARG12169	374.087	0.707809	0.329774	199.599	4.54669e-44	1.61822e-42	yes
PARG27095	910.075	-1.63972	0.183033	199.128	5.75216e-44	2.04312e-42	yes
PARG15731	944.254	0.597837	0.208425	199.062	5.94676e-44	2.10798e-42	yes
PARG24380	5512.34	0.891502	0.183566	198.935	6.33707e-44	2.24182e-42	yes
PARG07948	4135.98	-1.05139	0.13861	198.663	7.25761e-44	2.56231e-42	yes
PARG00168	583.216	-0.588847	0.305756	198.604	7.47731e-44	2.63459e-42	yes
PARG08526	4022.33	-1.06656	0.207964	198.47	7.99259e-44	2.81052e-42	yes
PARG20519	390.857	-0.0625527	0.278239	198.323	8.60374e-44	3.01938e-42	yes
PARG10268	972.7	0.855031	0.221184	198.301	8.70047e-44	3.04724e-42	yes
PARG21934	305.15	2.12554	0.28643	197.758	1.14121e-43	3.98903e-42	yes
PARG29528	2931.74	1.07076	0.153699	197.249	1.4718e-43	5.13437e-42	yes
PARG16483	810.458	-2.11712	0.213534	197.207	1.50354e-43	5.2347e-42	yes
PARG25948	531.104	2.65118	0.243463	197.094	1.59041e-43	5.5262e-42	yes
PARG12824	781.379	0.649158	0.224708	197.061	1.61727e-43	5.60843e-42	yes
PARG18147	118.47	6.56856	0.919933	196.569	2.06821e-43	7.15811e-42	yes
PARG15135	1910.79	1.78828	0.18836	196.517	2.12243e-43	7.33136e-42	yes
PARG14316	8845.2	0.658314	0.132293	196.173	2.52112e-43	8.69144e-42	yes
PARG03192	1420.36	-2.06425	0.172414	196.144	2.55782e-43	8.80069e-42	yes
PARG06546	861.244	4.41023	0.293791	196.098	2.61771e-43	8.98916e-42	yes
PARG16246	85.9254	10.1752	2.09113	196.069	2.65496e-43	9.09931e-42	yes
PARG13050	321.719	-1.78752	0.28899	195.647	3.27858e-43	1.12148e-41	yes
PARG09620	815.558	1.33029	0.191472	195.319	3.86378e-43	1.31909e-41	yes
PARG22833	586.303	-0.520853	0.222775	194.588	5.56781e-43	1.89716e-41	yes
PARG13955	1565.62	0.596159	0.165802	194.525	5.74719e-43	1.95449e-41	yes
PARG04146	425.824	-3.328	0.334638	194.423	6.0461e-43	2.05217e-41	yes
PARG01460	825.443	-3.46908	0.295551	194.35	6.27195e-43	2.12473e-41	yes
PARG12174	1783.54	1.78137	0.196611	193.904	7.83937e-43	2.65061e-41	yes
PARG12353	699.503	-0.069561	0.221219	193.656	8.87328e-43	2.99443e-41	yes
PARG03133	204.845	4.44699	0.447185	192.946	1.26532e-42	4.26186e-41	yes
PARG29923	412.138	1.11001	0.242773	192.046	1.98452e-42	6.67149e-41	yes
PARG17956	1452.61	1.08893	0.16585	191.798	2.24667e-42	7.53836e-41	yes
PARG08941	948.262	-0.383501	0.216774	191.469	2.64908e-42	8.87165e-41	yes
PARG22522	1500.47	2.60628	0.175958	191.213	3.00987e-42	1.00607e-40	yes
PARG06006	266.511	2.25359	0.297357	190.966	3.40636e-42	1.13644e-40	yes
PARG00462	1599.12	-0.75937	0.166813	190.934	3.46092e-42	1.15246e-40	yes
PARG07376	851.677	-2.19998	0.222399	190.878	3.55989e-42	1.18318e-40	yes
PARG05818	2622.2	1.2974	0.155477	190.312	4.72431e-42	1.56722e-40	yes
PARG24611	704.377	2.36553	0.219507	190.011	5.48987e-42	1.81776e-40	yes
PARG09652	268.213	2.97216	0.326722	189.43	7.34354e-42	2.42696e-40	yes
PARG10669	4394.64	-0.922682	0.19413	189.012	9.04795e-42	2.98463e-40	yes
PARG04424	165.151	-1.19437	0.522885	188.964	9.26882e-42	3.05177e-40	yes
PARG00112	328.044	2.37839	0.289476	188.613	1.10447e-41	3.62968e-40	yes
PARG11644	242.522	0.925196	0.310224	188.529	1.15202e-41	3.77889e-40	yes
PARG22852	3257.59	0.0894725	0.154238	188.455	1.19555e-41	3.91435e-40	yes
PARG13046	3456.56	-0.150781	0.159741	188.123	1.41147e-41	4.61271e-40	yes
PARG16679	2408.89	0.832704	0.149578	188.03	1.47816e-41	4.82169e-40	yes
PARG01344	9698.26	0.193626	0.18618	187.333	2.09468e-41	6.82012e-40	yes
PARG16272	803.36	0.532085	0.232261	187.135	2.31341e-41	7.51838e-40	yes
PARG23595	3984.89	-0.240142	0.151992	187.131	2.31791e-41	7.51908e-40	yes
PARG11672	201.615	-5.08362	0.498326	186.067	3.94601e-41	1.27769e-39	yes
PARG03720	291.123	-5.69616	0.472464	185.782	4.5485e-41	1.47007e-39	yes
PARG04593	292.503	2.33602	0.448717	185.702	4.73468e-41	1.52744e-39	yes
PARG23236	1091.92	1.57822	0.184186	185.578	5.03914e-41	1.62268e-39	yes
PARG28068	3640.34	-0.311205	0.160117	185.562	5.07883e-41	1.63247e-39	yes
PARG20253	4013.97	0.581612	0.172207	185.325	5.71778e-41	1.83449e-39	yes
PARG04493	1688.96	-0.464215	0.277848	185.184	6.13406e-41	1.96446e-39	yes
PARG19398	603.334	-0.589095	0.223769	185.067	6.50592e-41	2.07976e-39	yes
PARG16437	2034.35	0.560649	0.23592	185.028	6.63121e-41	2.11597e-39	yes
PARG04510	9807.68	0.385789	0.145083	184.98	6.79518e-41	2.16436e-39	yes
PARG07586	1755.99	3.55526	0.260265	184.754	7.60656e-41	2.41842e-39	yes
PARG12283	2898.5	0.849176	0.146843	184.741	7.65641e-41	2.42987e-39	yes
PARG21463	3690.48	2.8808	0.187323	184.495	8.65917e-41	2.74316e-39	yes
PARG29320	7203.92	-1.87694	0.161294	183.843	1.19966e-40	3.7936e-39	yes
PARG15043	537.539	2.03318	0.225737	183.537	1.39768e-40	4.41186e-39	yes
PARG20983	510.869	1.14017	0.233335	183.228	1.63122e-40	5.13981e-39	yes
PARG07024	440.152	2.60311	0.253818	183.197	1.657e-40	5.21171e-39	yes
PARG00948	487.304	1.00367	0.22519	183.125	1.71768e-40	5.39289e-39	yes
PARG03827	5754.46	-0.844135	0.173037	183.064	1.77092e-40	5.55014e-39	yes
PARG02109	492.279	-0.458963	0.2531	182.812	2.00873e-40	6.28426e-39	yes
PARG19419	223.527	2.25474	0.324463	182.594	2.24032e-40	6.99632e-39	yes
PARG14178	277.797	-3.30502	0.40381	182.586	2.24832e-40	7.00886e-39	yes
PARG07749	5637.17	-1.80406	0.148823	182.35	2.53059e-40	7.87484e-39	yes
PARG00167	958.538	1.37184	0.182718	182.119	2.84075e-40	8.8244e-39	yes
PARG24063	735.57	-1.1659	0.207783	182.068	2.91304e-40	9.033e-39	yes
PARG19047	272.831	3.18555	0.381107	182.017	2.98909e-40	9.2525e-39	yes
PARG20435	2954.2	-0.0959987	0.156386	181.808	3.31774e-40	1.02518e-38	yes
PARG12534	1272.96	-0.345374	0.172724	181.226	4.43825e-40	1.36901e-38	yes
PARG24712	2474.92	0.378987	0.17421	181.087	4.75775e-40	1.46499e-38	yes
PARG02883	1525.09	-0.0788266	0.260665	180.978	5.02532e-40	1.54467e-38	yes
PARG20158	1077.78	-0.808295	0.215511	180.895	5.23722e-40	1.607e-38	yes
PARG18527	727.996	-2.32426	0.237618	180.81	5.46447e-40	1.6738e-38	yes
PARG13775	672.414	-0.0756977	0.212902	180.723	5.70803e-40	1.74537e-38	yes
PARG23027	564.419	1.51452	0.318821	180.644	5.93911e-40	1.81287e-38	yes
PARG12911	439.169	2.26025	0.254334	180.605	6.05621e-40	1.84541e-38	yes
PARG20866	4720.24	-1.27355	0.163007	180.458	6.51714e-40	1.98243e-38	yes
PARG27347	1290.42	0.773664	0.181856	180.384	6.76096e-40	2.05304e-38	yes
PARG08352	2496.83	-0.504221	0.21641	179.832	8.9137e-40	2.70208e-38	yes
PARG23188	558.102	0.810952	0.251384	179.286	1.17067e-39	3.54264e-38	yes
PARG17692	148.771	-5.91423	0.608352	178.73	1.54595e-39	4.67026e-38	yes
PARG11779	437.832	-3.17252	0.258135	178.455	1.77423e-39	5.35068e-38	yes
PARG30010	208.055	2.60688	0.352416	177.777	2.48973e-39	7.49562e-38	yes
PARG13219	295.836	1.16463	0.284724	177.727	2.55306e-39	7.67316e-38	yes
PARG21167	1660.51	0.0778399	0.183213	177.536	2.80953e-39	8.42954e-38	yes
PARG02780	8282.79	1.41309	0.17013	177.519	2.8331e-39	8.4858e-38	yes
PARG27174	1147.15	-1.98164	0.208031	177.362	3.0637e-39	9.16089e-38	yes
PARG03301	1678.94	0.691879	0.165861	176.999	3.67324e-39	1.09648e-37	yes
PARG12679	3852.18	2.28617	0.232224	176.984	3.70248e-39	1.10334e-37	yes
PARG09622	2212.78	-0.396037	0.218348	176.832	3.99378e-39	1.18813e-37	yes
PARG13589	307.2	1.47725	0.285403	176.7	4.26751e-39	1.26742e-37	yes
PARG27322	3216.24	-1.9148	0.15517	176.126	5.68372e-39	1.68518e-37	yes
PARG00602	1191.67	-1.11986	0.180674	176.049	5.90675e-39	1.74542e-37	yes
PARG01515	536.438	0.657872	0.243785	176.05	5.90551e-39	1.74542e-37	yes
PARG01048	93.2453	7.82125	1.50386	175.905	6.34867e-39	1.87286e-37	yes
PARG28512	4166.04	0.0733015	0.155178	175.583	7.45771e-39	2.19634e-37	yes
PARG21314	773.171	1.35298	0.20231	175.546	7.59827e-39	2.23399e-37	yes
PARG05778	2633.01	0.984514	0.169742	174.275	1.4344e-38	4.21029e-37	yes
PARG22860	77.5897	10.0249	2.09403	174.158	1.52043e-38	4.45538e-37	yes
PARG28236	880.564	-0.150488	0.194144	173.969	1.67169e-38	4.89046e-37	yes
PARG25047	486.68	1.22832	0.246157	173.873	1.75399e-38	5.12271e-37	yes
PARG24197	223.719	2.362	0.340984	173.581	2.02975e-38	5.91825e-37	yes
PARG06018	1507.35	0.0426044	0.185609	173.431	2.18707e-38	6.36639e-37	yes
PARG02084	1289.62	0.558862	0.174193	173.379	2.24549e-38	6.52566e-37	yes
PARG18568	346.344	1.97261	0.302749	173.313	2.32001e-38	6.73109e-37	yes
PARG13496	136.019	10.8264	2.10153	173.142	2.52693e-38	7.31935e-37	yes
PARG16031	816.154	-2.33336	0.199961	172.651	3.23045e-38	9.34174e-37	yes
PARG25758	619.707	-1.30637	0.236788	172.084	4.2901e-38	1.23856e-36	yes
PARG13596	955.982	1.23237	0.194186	171.944	4.60188e-38	1.3264e-36	yes
PARG12700	3180.85	-0.0438433	0.158938	171.296	6.36122e-38	1.83049e-36	yes
PARG01959	284.464	0.915316	0.280727	170.845	7.96982e-38	2.28963e-36	yes
PARG29546	1034.28	-1.99276	0.187093	170.71	8.5286e-38	2.44616e-36	yes
PARG00107	1369.07	1.51994	0.204133	170.697	8.58303e-38	2.45777e-36	yes
PARG18521	1115.23	-0.0296483	0.180495	170.306	1.0434e-37	2.98292e-36	yes
PARG25398	331.099	0.934112	0.267238	169.917	1.26756e-37	3.61789e-36	yes
PARG02334	894.248	-1.11588	0.212126	169.748	1.37945e-37	3.93089e-36	yes
PARG25363	834.189	0.24861	0.196119	169.701	1.4123e-37	4.01798e-36	yes
PARG19714	865.914	1.90236	0.23331	169.267	1.75449e-37	4.98344e-36	yes
PARG27043	145.491	-6.30616	0.764526	169.096	1.91074e-37	5.41848e-36	yes
PARG12536	2280.73	-0.168309	0.157483	169.062	1.94417e-37	5.50441e-36	yes
PARG26555	220.301	-5.32179	0.434222	168.897	2.11091e-37	5.96689e-36	yes
PARG20585	419.187	1.52035	0.24011	168.705	2.32353e-37	6.55736e-36	yes
PARG00404	2504.3	-1.42225	0.190427	168.388	2.72224e-37	7.67026e-36	yes
PARG26646	969.861	1.33724	0.180951	168.344	2.78275e-37	7.82822e-36	yes
PARG06005	751.609	1.3268	0.195469	168.33	2.80344e-37	7.8738e-36	yes
PARG29361	73.7619	9.95832	2.09946	168.32	2.81699e-37	7.89924e-36	yes
PARG06897	1525.22	-0.0164342	0.224374	168.303	2.84116e-37	7.95435e-36	yes
PARG01484	260.127	-0.175307	0.341312	168.237	2.93574e-37	8.20608e-36	yes
PARG05506	631.306	1.84928	0.235618	168.208	2.9789e-37	8.31349e-36	yes
PARG07100	647.111	2.07268	0.217673	168.148	3.0692e-37	8.55193e-36	yes
PARG13718	250.607	-4.00058	0.322933	167.549	4.1423e-37	1.15237e-35	yes
PARG30256	674.897	1.85225	0.230204	167.295	4.70302e-37	1.3063e-35	yes
PARG02169	2701.3	-0.226417	0.171757	167.061	5.28538e-37	1.46573e-35	yes
PARG03548	3090.85	-0.908627	0.161168	166.787	6.06256e-37	1.67861e-35	yes
PARG14219	7314.54	0.0559634	0.132284	166.139	8.38221e-37	2.31723e-35	yes
PARG25288	1518.25	0.4026	0.172038	165.86	9.6397e-37	2.66068e-35	yes
PARG24041	4858.55	-0.112728	0.239891	165.575	1.11108e-36	3.06192e-35	yes
PARG29552	433.637	-0.752741	0.329	164.648	1.76702e-36	4.86193e-35	yes
PARG06849	381.592	-1.15664	0.26406	163.611	2.96633e-36	8.14908e-35	yes
PARG01974	345.589	2.13831	0.286904	163.044	3.93857e-36	1.08031e-34	yes
PARG08690_DAM6	1480.06	-5.25415	0.57375	76.6558	1.37463e-14	1.13259e-34	yes
PARG16453	1220.38	1.33632	0.17491	162.745	4.57426e-36	1.25272e-34	yes
PARG08246	1012.51	1.36561	0.178958	162.603	4.9116e-36	1.34301e-34	yes
PARG06104	636.503	-0.489097	0.2219	162.536	5.07748e-36	1.38622e-34	yes
PARG08694	1046.01	0.321037	0.224527	162.524	5.10924e-36	1.39272e-34	yes
PARG25945	190.209	4.96249	0.511354	162.449	5.30551e-36	1.44398e-34	yes
PARG21274	290.542	3.26347	0.348773	162.375	5.50379e-36	1.49564e-34	yes
PARG00455	216.894	2.60851	0.336579	162.184	6.05469e-36	1.6428e-34	yes
PARG13644	1291.44	-0.38949	0.177342	162.027	6.55016e-36	1.7745e-34	yes
PARG06686	2059.26	-1.1584	0.17167	161.99	6.67241e-36	1.80484e-34	yes
PARG13749	107.969	8.05886	1.53394	161.879	7.05438e-36	1.90522e-34	yes
PARG21320	2874.25	-2.3288	0.190091	161.86	7.12025e-36	1.92007e-34	yes
PARG19136	741.71	2.02052	0.241423	161.817	7.27741e-36	1.95944e-34	yes
PARG10386	545.623	-2.13273	0.247212	161.618	8.03875e-36	2.16112e-34	yes
PARG13234	660.908	1.5368	0.214803	161.572	8.22511e-36	2.20785e-34	yes
PARG18465	2785.06	1.33898	0.146311	161.523	8.42718e-36	2.25864e-34	yes
PARG20247	1761	-0.843147	0.202963	161.423	8.8617e-36	2.37148e-34	yes
PARG19094	4068.07	0.839934	0.184389	161.163	1.00887e-35	2.69572e-34	yes
PARG00620	606.958	-3.397	0.27663	160.497	1.40772e-35	3.75578e-34	yes
PARG11866	1691.28	0.370422	0.213027	160.157	1.6688e-35	4.44558e-34	yes
PARG27526	2576.52	0.554067	0.154677	160.055	1.75614e-35	4.67117e-34	yes
PARG14473	1595.6	0.421009	0.196798	160.024	1.78319e-35	4.73596e-34	yes
PARG06083	238.908	1.45847	0.37921	159.898	1.89973e-35	5.03786e-34	yes
PARG10292	846.899	1.21408	0.192366	159.64	2.16086e-35	5.72173e-34	yes
PARG27586	680.517	1.60164	0.207535	159.488	2.33176e-35	6.16495e-34	yes
PARG18249	191.65	-3.9888	0.384716	159.259	2.61396e-35	6.9007e-34	yes
PARG29571	945.195	1.38547	0.189733	159.198	2.69476e-35	7.10333e-34	yes
PARG01103	1422.58	0.438744	0.171213	159.182	2.7174e-35	7.1523e-34	yes
PARG12398	765.852	0.577357	0.216497	158.865	3.18362e-35	8.36689e-34	yes
PARG02446	6118.63	-0.459846	0.135673	158.749	3.37321e-35	8.85191e-34	yes
PARG03951	167.565	-2.37398	0.425057	158.52	3.78191e-35	9.90963e-34	yes
PARG12992	1510	-1.46039	0.194468	158.449	3.91955e-35	1.0255e-33	yes
PARG30093	648.5	0.329773	0.261715	158.042	4.80345e-35	1.25489e-33	yes
PARG18451	1090.88	0.466048	0.187905	158.013	4.87394e-35	1.27142e-33	yes
PARG18382	4506.13	-1.8456	0.197228	157.687	5.73588e-35	1.49405e-33	yes
PARG15677	369.082	0.920579	0.315845	157.594	6.01086e-35	1.56336e-33	yes
PARG18891	392.379	1.19143	0.281089	157.468	6.40218e-35	1.66268e-33	yes
PARG04043	351.19	2.31629	0.286102	157.251	7.13652e-35	1.85065e-33	yes
PARG13841	1658.38	0.516618	0.159225	157.149	7.50829e-35	1.94419e-33	yes
PARG08132	971.104	1.14292	0.188201	157.076	7.7888e-35	2.01386e-33	yes
PARG22541	170.63	5.88495	0.735309	156.752	9.15611e-35	2.36392e-33	yes
PARG07665	204.025	-4.23497	0.368406	156.66	9.58796e-35	2.47178e-33	yes
PARG09169	8132.17	-0.698676	0.172129	156.486	1.04607e-34	2.69282e-33	yes
PARG21265	1639.84	1.40797	0.169443	156.085	1.27784e-34	3.28464e-33	yes
PARG05989	1494.72	1.07202	0.168348	156.024	1.31789e-34	3.38264e-33	yes
PARG18363	1702.94	0.954184	0.169054	155.95	1.36749e-34	3.50485e-33	yes
PARG19393	769.977	2.32644	0.281026	155.677	1.56775e-34	4.01225e-33	yes
PARG19882	315.55	-0.553767	0.259487	155.602	1.62686e-34	4.15749e-33	yes
PARG16210	268.849	0.435998	0.2791	155.434	1.7701e-34	4.51696e-33	yes
PARG07524	269.685	1.36253	0.293999	155.11	2.08134e-34	5.3035e-33	yes
PARG07213	1284.5	-0.0350001	0.197348	155.046	2.14911e-34	5.46825e-33	yes
PARG17563	437.036	2.16197	0.291827	154.869	2.34797e-34	5.9656e-33	yes
PARG27587	595.65	1.37788	0.211858	154.847	2.37331e-34	6.0213e-33	yes
PARG28530	989.662	-2.03161	0.180908	154.715	2.53601e-34	6.4248e-33	yes
PARG00326	603.829	-0.312849	0.224183	154.595	2.69196e-34	6.81008e-33	yes
PARG05320	729.452	0.834905	0.213674	154.5	2.82343e-34	7.13242e-33	yes
PARG29434	1824.56	-1.16024	0.176428	154.465	2.87246e-34	7.24584e-33	yes
PARG12129	1758.83	1.29835	0.163749	154.301	3.11843e-34	7.85504e-33	yes
PARG13768	2769.28	-1.94427	0.162556	154.222	3.24431e-34	8.16043e-33	yes
PARG14743	362.563	2.55673	0.289517	154.076	3.49065e-34	8.76752e-33	yes
PARG07916	376.968	-3.00701	0.257003	154.019	3.59107e-34	9.00687e-33	yes
PARG06212	2526.89	-0.201966	0.156207	154.001	3.62391e-34	9.07629e-33	yes
PARG02033	929.726	1.66895	0.193916	153.534	4.57595e-34	1.14444e-32	yes
PARG28802	142.39	0.0692162	0.515057	153.327	5.07586e-34	1.26767e-32	yes
PARG04596	489.86	1.48492	0.340129	153.292	5.16436e-34	1.28794e-32	yes
PARG20384	810.9	5.83161	0.435832	153.198	5.41456e-34	1.34842e-32	yes
PARG19646	391.272	-3.52614	0.294751	152.972	6.06035e-34	1.50712e-32	yes
PARG06453	616.592	-1.55683	0.242861	152.816	6.55198e-34	1.62707e-32	yes
PARG00997	7417.2	1.04073	0.139812	152.353	8.26106e-34	2.0486e-32	yes
PARG14630	586.667	1.2575	0.226839	152.335	8.33276e-34	2.06347e-32	yes
PARG13099	592.799	1.23873	0.218697	152.015	9.78113e-34	2.41873e-32	yes
PARG00129	185.281	3.02344	0.375979	151.87	1.05171e-33	2.59707e-32	yes
PARG12933	997.275	1.7059	0.193258	151.67	1.16245e-33	2.8665e-32	yes
PARG18566	1473.97	-1.71566	0.195497	151.523	1.25079e-33	3.08003e-32	yes
PARG07128	88.6022	10.2257	2.11803	151.177	1.48733e-33	3.65738e-32	yes
PARG03710	421.363	0.968299	0.248083	150.993	1.62999e-33	4.00258e-32	yes
PARG13543	567.942	-0.57288	0.288694	150.838	1.76206e-33	4.32086e-32	yes
PARG13131	10548.4	0.355553	0.129243	150.794	1.80094e-33	4.41005e-32	yes
PARG14057	89.4714	3.92882	0.585331	150.605	1.97952e-33	4.8406e-32	yes
PARG22059	1489.7	-2.31103	0.265261	150.471	2.11699e-33	5.16957e-32	yes
PARG18642	527.304	-1.69952	0.263939	150.372	2.22372e-33	5.42268e-32	yes
PARG20855	2710.44	0.656688	0.198505	149.926	2.77915e-33	6.76773e-32	yes
PARG27108	71.0001	7.44765	1.52635	149.753	3.03009e-33	7.3686e-32	yes
PARG16366	3872.17	-2.19023	0.187344	149.717	3.08612e-33	7.49449e-32	yes
PARG27340	3360.31	-0.65974	0.157492	149.445	3.53581e-33	8.5747e-32	yes
PARG19020	1714.88	-0.653989	0.161696	149.304	3.79269e-33	9.17343e-32	yes
PARG22671	5959.32	-0.59667	0.2144	149.304	3.79313e-33	9.17343e-32	yes
PARG27316	1008.72	-3.0509	0.261684	149.185	4.02632e-33	9.72402e-32	yes
PARG27456	223.389	5.25695	0.622379	148.984	4.45214e-33	1.07377e-31	yes
PARG07589	2954.55	1.24919	0.150187	148.932	4.56802e-33	1.10021e-31	yes
PARG21323	1797.53	-0.681237	0.185018	148.828	4.8134e-33	1.15772e-31	yes
PARG24688	1558.96	-1.28665	0.159598	148.653	5.25285e-33	1.26169e-31	yes
PARG10100	1614.14	1.30107	0.161772	148.444	5.83215e-33	1.39892e-31	yes
PARG19217	1307.91	2.1709	0.18892	148.388	5.99715e-33	1.43654e-31	yes
PARG04652	1891.19	0.570631	0.162319	148.381	6.01844e-33	1.43968e-31	yes
PARG10864	131.98	2.7019	0.418687	148.161	6.71675e-33	1.60454e-31	yes
PARG13643	154.616	-3.00964	0.438196	148.105	6.90834e-33	1.64806e-31	yes
PARG00216	1729.19	0.506347	0.215836	148.056	7.08011e-33	1.68675e-31	yes
PARG05743	792.198	-0.933884	0.229138	147.701	8.454e-33	2.01134e-31	yes
PARG24950	3198.93	-2.11108	0.182559	146.906	1.25828e-32	2.98961e-31	yes
PARG07057	150.483	1.713	0.391938	146.34	1.66965e-32	3.96164e-31	yes
PARG10254	626.595	1.08904	0.25668	145.896	2.08521e-32	4.941e-31	yes
PARG02097	593.744	-0.056384	0.25241	145.399	2.67302e-32	6.32532e-31	yes
PARG06588	541.089	1.53118	0.244948	145.392	2.68246e-32	6.3391e-31	yes
PARG28471	376.103	0.996111	0.300643	145.372	2.70909e-32	6.39344e-31	yes
PARG03713	144.655	2.7629	0.410996	145.367	2.71675e-32	6.40293e-31	yes
PARG17728	1880.47	2.22634	0.22939	145.296	2.81446e-32	6.62434e-31	yes
PARG22729	6706.53	-1.55134	0.145034	145.285	2.82986e-32	6.65167e-31	yes
PARG06687	1015.14	1.11532	0.183009	145.247	2.88479e-32	6.77176e-31	yes
PARG25126	839.576	1.09657	0.202571	145.066	3.15708e-32	7.40105e-31	yes
PARG16074	451.234	3.42809	0.283179	144.949	3.34756e-32	7.83713e-31	yes
PARG08621	702.195	-1.66447	0.24243	144.698	3.79607e-32	8.87533e-31	yes
PARG09088	2503.62	-1.44524	0.178352	144.516	4.15655e-32	9.70524e-31	yes
PARG16490	248.494	3.18067	0.33682	144.444	4.31009e-32	1.00504e-30	yes
PARG06794	209.528	1.56897	0.44291	144.041	5.27059e-32	1.22738e-30	yes
PARG12397	1520.7	0.610928	0.189235	143.876	5.72408e-32	1.33123e-30	yes
PARG03111	2263.32	-1.25366	0.158969	143.827	5.86748e-32	1.36277e-30	yes
PARG12178	3767.06	1.04484	0.144518	143.738	6.13392e-32	1.42278e-30	yes
PARG25647	14702.6	-1.59247	0.149867	143.435	7.13578e-32	1.65298e-30	yes
PARG25648	14705.5	-1.59266	0.149918	143.373	7.36247e-32	1.70325e-30	yes
PARG00046	431.89	-2.26933	0.246764	143.168	8.1575e-32	1.88469e-30	yes
PARG06145	3861.02	1.9439	0.186275	143.041	8.69237e-32	2.00563e-30	yes
PARG25353	800.645	1.46469	0.20235	143.027	8.74941e-32	2.01615e-30	yes
PARG25680	480.555	2.19393	0.245823	142.913	9.26675e-32	2.13257e-30	yes
PARG10583	1389.75	0.907552	0.168354	142.866	9.48652e-32	2.18029e-30	yes
PARG09027	4851.61	-0.601934	0.145673	142.705	1.02793e-31	2.3594e-30	yes
PARG10674	261.774	1.28232	0.28438	142.691	1.03538e-31	2.37341e-30	yes
PARG18924	8004.34	-1.00698	0.149243	142.67	1.04634e-31	2.39541e-30	yes
PARG02040	2523.31	-1.26679	0.156091	142.252	1.28955e-31	2.94836e-30	yes
PARG28291	1936.02	0.641884	0.165143	142.227	1.30531e-31	2.98052e-30	yes
PARG24776	309.736	2.44826	0.298273	142.218	1.31171e-31	2.99124e-30	yes
PARG14187	166.392	2.92424	0.408231	142.205	1.32002e-31	3.00629e-30	yes
PARG06265	1360.27	-0.858776	0.20507	142.144	1.36098e-31	3.09557e-30	yes
PARG13254	487.105	2.4449	0.247128	142.099	1.39219e-31	3.16246e-30	yes
PARG17788	60.6834	9.67518	2.10886	142.086	1.40125e-31	3.17894e-30	yes
PARG16380	390.44	2.53258	0.263109	141.916	1.52502e-31	3.45527e-30	yes
PARG06406	118.688	0.772638	0.708566	141.858	1.56987e-31	3.55232e-30	yes
PARG04435	1007.82	1.16348	0.184518	141.766	1.64394e-31	3.71513e-30	yes
PARG09081	73.0401	9.94691	2.11757	141.642	1.74924e-31	3.94804e-30	yes
PARG27901	400.189	-0.00141277	0.240831	141.576	1.80791e-31	4.07521e-30	yes
PARG24285	1493.86	-2.76352	0.249843	141.29	2.08562e-31	4.69517e-30	yes
PARG04588	190.806	2.4676	0.626887	141.169	2.21634e-31	4.98309e-30	yes
PARG29460	245.233	2.49293	0.348747	141.072	2.32643e-31	5.22392e-30	yes
PARG22728	14612.2	-1.35494	0.131004	141.017	2.39086e-31	5.36175e-30	yes
PARG04147	235.004	-3.14248	0.38207	141.008	2.40205e-31	5.37999e-30	yes
PARG20269	414.297	-2.46523	0.243273	140.971	2.44613e-31	5.47174e-30	yes
PARG01381	267.019	-1.44001	0.36345	140.759	2.72023e-31	6.07714e-30	yes
PARG21796	1135.43	-0.762836	0.215499	140.673	2.83925e-31	6.33499e-30	yes
PARG26839	1447.99	-0.171748	0.20308	140.581	2.97359e-31	6.62631e-30	yes
PARG01391	409.523	1.03936	0.265741	140.327	3.37532e-31	7.51201e-30	yes
PARG18999	1331.75	2.10981	0.187333	139.887	4.20612e-31	9.34918e-30	yes
PARG20345	743.412	-0.13415	0.276436	139.815	4.3604e-31	9.67986e-30	yes
PARG00864	1851.74	-1.40676	0.173136	139.44	5.26115e-31	1.16648e-29	yes
PARG25042	72.6229	5.89827	0.988089	139.412	5.3342e-31	1.18118e-29	yes
PARG22892	162.292	5.9988	0.753468	139.279	5.70234e-31	1.26111e-29	yes
PARG28301	1370.02	2.35536	0.203459	139.263	5.74756e-31	1.26952e-29	yes
PARG13047	494.293	-1.78364	0.258511	139.236	5.82395e-31	1.28478e-29	yes
PARG24229	3158.79	0.356449	0.149821	139.161	6.04684e-31	1.33228e-29	yes
PARG26831	148.961	0.843926	0.504225	138.957	6.69585e-31	1.47342e-29	yes
PARG06348	449.519	2.89356	0.292026	138.926	6.80211e-31	1.49493e-29	yes
PARG07939	7089.03	-0.507592	0.200545	138.698	7.6213e-31	1.67136e-29	yes
PARG16986	870.415	1.75007	0.192568	138.698	7.62388e-31	1.67136e-29	yes
PARG02596	1346.5	0.981746	0.168037	138.685	7.67421e-31	1.6803e-29	yes
PARG26488	750.352	-1.07565	0.213168	138.143	1.00623e-30	2.20044e-29	yes
PARG02932	878.887	-0.0388937	0.200293	138.072	1.04262e-30	2.27718e-29	yes
PARG11571	4686.27	-1.58672	0.146791	138.015	1.07242e-30	2.33938e-29	yes
PARG17720	1212.18	1.92157	0.187281	137.897	1.13788e-30	2.47908e-29	yes
PARG02919	461.167	0.959752	0.25598	137.892	1.1407e-30	2.48215e-29	yes
PARG04419	1206.64	1.77332	0.214274	137.618	1.30825e-30	2.84321e-29	yes
PARG24852	775.064	1.02379	0.220257	137.614	1.31037e-30	2.8443e-29	yes
PARG14282	1440.21	-1.86696	0.165299	137.362	1.48665e-30	3.22297e-29	yes
PARG14257	4229.87	-0.506108	0.220854	137.335	1.50668e-30	3.26237e-29	yes
PARG05759	75.3512	9.93704	2.09309	137.258	1.56615e-30	3.38697e-29	yes
PARG19635	1208.36	-2.04675	0.185969	137.164	1.6415e-30	3.54555e-29	yes
PARG19031	2950.7	-1.5819	0.144465	137.053	1.73513e-30	3.74319e-29	yes
PARG16484	1186.52	-1.78815	0.173426	136.957	1.82079e-30	3.92317e-29	yes
PARG25310	118.65	5.07969	0.645908	136.881	1.89093e-30	4.06933e-29	yes
PARG03816	1840.58	-0.318452	0.211062	136.82	1.9497e-30	4.19067e-29	yes
PARG24967	247.864	1.79383	0.301893	136.795	1.97398e-30	4.23768e-29	yes
PARG23340	214.401	1.94572	0.390175	136.741	2.02767e-30	4.34762e-29	yes
PARG06042	457.834	-0.553895	0.255703	136.655	2.1173e-30	4.53427e-29	yes
PARG00938	3151.33	0.307316	0.147723	136.494	2.29478e-30	4.90838e-29	yes
PARG05089	394.836	-0.130638	0.316198	136.408	2.39578e-30	5.11818e-29	yes
PARG20240	2235.3	0.0525575	0.161971	136.352	2.46392e-30	5.25737e-29	yes
PARG21805	1105.98	2.10491	0.191981	136.293	2.53731e-30	5.40739e-29	yes
PARG08008	4544.22	1.91212	0.178078	136.247	2.59614e-30	5.52606e-29	yes
PARG00896	507.931	-2.17403	0.250695	136.203	2.65385e-30	5.64208e-29	yes
PARG13595	3878.05	-0.35182	0.150869	136.2	2.65814e-30	5.64437e-29	yes
PARG20079	1051.85	0.468611	0.200951	136.193	2.66738e-30	5.65716e-29	yes
PARG15732	344.921	1.61523	0.344176	136.046	2.87067e-30	6.08098e-29	yes
PARG24219	919.236	0.653968	0.226377	135.699	3.41524e-30	7.22584e-29	yes
PARG24984	814.706	1.17626	0.25392	135.696	3.42013e-30	7.22748e-29	yes
PARG28091	534.976	1.1751	0.246649	135.461	3.84688e-30	8.11954e-29	yes
PARG24179	755.305	0.452496	0.194121	135.447	3.873e-30	8.16488e-29	yes
PARG19857	578.355	1.28608	0.24736	135.366	4.03334e-30	8.49271e-29	yes
PARG13492	196.979	3.20632	0.401627	135.113	4.57653e-30	9.62495e-29	yes
PARG06685	1981.5	-1.19819	0.169548	134.955	4.95332e-30	1.04049e-28	yes
PARG22810	106.062	4.07738	0.610361	134.911	5.06332e-30	1.06233e-28	yes
PARG19870	817.402	1.01812	0.201759	134.903	5.08345e-30	1.06528e-28	yes
PARG23206	92.3877	6.22361	0.971213	134.843	5.2392e-30	1.09661e-28	yes
PARG16936	710.141	-2.5463	0.270634	134.759	5.46369e-30	1.14224e-28	yes
PARG26958	213.885	-4.5538	0.479633	134.577	5.98252e-30	1.24922e-28	yes
PARG04100	1835.03	-1.56284	0.194832	134.217	7.16264e-30	1.49387e-28	yes
PARG18923	8186.94	-0.962287	0.147745	134.163	7.36102e-30	1.53343e-28	yes
PARG11595	254.347	2.05705	0.301937	134.031	7.86307e-30	1.63608e-28	yes
PARG13674	706.095	1.32895	0.200938	133.949	8.19296e-30	1.7027e-28	yes
PARG06342	268.986	-0.677043	0.393795	133.892	8.4298e-30	1.74986e-28	yes
PARG19940	218.388	2.52861	0.402981	133.833	8.67839e-30	1.79933e-28	yes
PARG02888	343.996	1.67041	0.271204	133.811	8.77419e-30	1.81705e-28	yes
PARG12040	75.1326	5.92378	0.962569	133.708	9.23982e-30	1.91123e-28	yes
PARG25040	768.605	0.270097	0.190449	132.938	1.35826e-29	2.80621e-28	yes
PARG18594	1229.56	0.225022	0.182754	132.859	1.41231e-29	2.91447e-28	yes
PARG27595	2985.68	1.41317	0.185771	132.807	1.4501e-29	2.98894e-28	yes
PARG19553	959.463	1.33285	0.232885	132.752	1.49003e-29	3.06765e-28	yes
PARG27002	591.093	-1.95857	0.232046	132.588	1.61784e-29	3.32688e-28	yes
PARG18722	1488.99	2.07255	0.196387	132.498	1.69169e-29	3.47468e-28	yes
PARG29473	1062.67	2.5261	0.214616	132.422	1.75783e-29	3.60632e-28	yes
PARG02155	608.962	-0.00577822	0.229705	132.191	1.97256e-29	4.04214e-28	yes
PARG24720	534.198	-0.196872	0.228352	132.08	2.08592e-29	4.26946e-28	yes
PARG20522	105.349	-1.2869	0.589316	131.925	2.25321e-29	4.6065e-28	yes
PARG22806	1485.06	0.155021	0.216207	131.8	2.39917e-29	4.89921e-28	yes
PARG02438	867.917	-0.502408	0.190268	131.783	2.41957e-29	4.93513e-28	yes
PARG22531	14790.1	-1.56573	0.156657	131.558	2.70771e-29	5.51645e-28	yes
PARG25403	435.605	1.29764	0.235943	131.388	2.94756e-29	5.99814e-28	yes
PARG16534	1125.37	-0.496885	0.191104	131.258	3.14594e-29	6.39445e-28	yes
PARG18533	414.965	-2.03948	0.260163	131.208	3.22499e-29	6.54755e-28	yes
PARG07266	1028.46	-0.565758	0.187781	131.109	3.38866e-29	6.87191e-28	yes
PARG13753	657.444	2.22133	0.224098	131.107	3.3927e-29	6.87218e-28	yes
PARG02234	3194.44	1.16626	0.144269	130.937	3.69342e-29	7.47269e-28	yes
PARG11661	284.061	0.590122	0.347235	130.849	3.85959e-29	7.79992e-28	yes
PARG04574	576.547	0.676727	0.228751	130.831	3.8948e-29	7.86205e-28	yes
PARG11382	180.633	-2.36831	0.481384	130.632	4.30142e-29	8.67289e-28	yes
PARG20266	727.8	1.31218	0.202678	130.513	4.56586e-29	9.19553e-28	yes
PARG05773	119.584	-7.15883	0.733694	130.494	4.60972e-29	9.27323e-28	yes
PARG02951	1681.83	1.1921	0.17218	130.258	5.18709e-29	1.04228e-27	yes
PARG04257	1965.45	-0.810817	0.223318	130.116	5.56889e-29	1.11772e-27	yes
PARG00456	264.371	-4.42081	0.541558	129.708	6.82886e-29	1.36904e-27	yes
PARG12211	323.77	0.113578	0.35141	129.7	6.85479e-29	1.37268e-27	yes
PARG07377	687.012	1.3094	0.205558	129.654	7.01496e-29	1.40315e-27	yes
PARG27625	348.355	-4.19611	0.380968	129.617	7.14493e-29	1.42752e-27	yes
PARG22208	1041.92	1.12431	0.182543	129.444	7.78992e-29	1.55462e-27	yes
PARG11103	1482.74	0.202868	0.179972	129.247	8.59536e-29	1.71342e-27	yes
PARG19073	1319.36	-1.94056	0.195819	129.195	8.82493e-29	1.75719e-27	yes
PARG12934	777.775	1.66651	0.202811	129.149	9.02953e-29	1.7959e-27	yes
PARG09356	1153.98	0.317245	0.170112	129.028	9.59098e-29	1.90541e-27	yes
PARG12145	408.698	0.874244	0.258925	128.657	1.15478e-28	2.29158e-27	yes
PARG19198	5320.87	-1.59682	0.154329	128.631	1.1696e-28	2.31837e-27	yes
PARG12713	417.433	0.0199067	0.272927	128.602	1.18702e-28	2.35024e-27	yes
PARG06380	567.76	1.92853	0.255008	128.178	1.46704e-28	2.90141e-27	yes
PARG08770	2574.98	-0.324823	0.155333	128.12	1.51049e-28	2.98398e-27	yes
PARG02475	337.215	0.176025	0.281042	128.014	1.59281e-28	3.14307e-27	yes
PARG22868	67.405	6.35716	1.13538	127.921	1.6688e-28	3.28933e-27	yes
PARG00362	1707.91	-0.00771468	0.180005	127.648	1.91216e-28	3.76479e-27	yes
PARG21863	244.531	1.16192	0.303048	127.627	1.9326e-28	3.80077e-27	yes
PARG08405	390.736	2.4561	0.358625	127.563	1.99521e-28	3.91914e-27	yes
PARG29484	323.492	2.95725	0.341295	127.561	1.99724e-28	3.91914e-27	yes
PARG23561	2197.22	-1.65021	0.23127	127.437	2.12572e-28	4.1666e-27	yes
PARG07799	132.413	4.50098	0.554886	127.286	2.29205e-28	4.48762e-27	yes
PARG23767	258.619	0.104717	0.354228	127.262	2.31952e-28	4.53635e-27	yes
PARG24449	646.451	1.85542	0.217115	127.234	2.35183e-28	4.59443e-27	yes
PARG07383	5703.57	-0.237198	0.141126	127.045	2.58502e-28	5.04438e-27	yes
PARG19843	10413.8	-1.42083	0.14723	126.752	2.9935e-28	5.83501e-27	yes
PARG29422	1003.14	-0.389374	0.296856	126.661	3.13251e-28	6.09921e-27	yes
PARG13480	1098.94	0.790515	0.174459	126.58	3.2615e-28	6.34334e-27	yes
PARG15235	1171.46	0.973942	0.224005	126.351	3.65803e-28	7.10668e-27	yes
PARG10521	271.615	-0.506326	0.363668	126.249	3.84898e-28	7.4694e-27	yes
PARG12056	606.054	0.676516	0.205182	126.232	3.88244e-28	7.52603e-27	yes
PARG27801	168.319	-0.282136	0.437236	126.099	4.14879e-28	8.03349e-27	yes
PARG05745	856.503	-0.96986	0.210322	125.916	4.54754e-28	8.79592e-27	yes
PARG25937	133.424	4.14977	0.535294	125.85	4.69903e-28	9.07894e-27	yes
PARG27845	867.883	-1.23906	0.190055	125.826	4.75642e-28	9.17973e-27	yes
PARG13145	3842.3	0.0916843	0.154608	125.739	4.96854e-28	9.57861e-27	yes
PARG28532	637.682	1.11147	0.224675	125.685	5.10203e-28	9.82519e-27	yes
PARG15174	837.087	-1.3337	0.214264	125.589	5.35531e-28	1.03016e-26	yes
PARG02249	247.664	-0.719685	0.37891	125.472	5.67638e-28	1.08954e-26	yes
PARG12116	1051.13	0.977905	0.206757	125.472	5.67541e-28	1.08954e-26	yes
PARG08344	97.047	4.81014	0.663414	125.409	5.85989e-28	1.12354e-26	yes
PARG20944	1230.59	0.267313	0.238107	125.403	5.87468e-28	1.12515e-26	yes
PARG29762	4412.82	-0.55186	0.142355	125.384	5.93283e-28	1.13505e-26	yes
PARG15291	137.08	-1.0928	0.464336	125.257	6.3214e-28	1.20807e-26	yes
PARG08502	907.957	-0.762761	0.196698	125.235	6.39021e-28	1.21913e-26	yes
PARG23763	2179.73	-0.794461	0.221284	125.234	6.39314e-28	1.21913e-26	yes
PARG29369	480.489	-4.149	0.381521	125.191	6.53318e-28	1.24449e-26	yes
PARG20667	221.459	2.65252	0.392547	125.075	6.92327e-28	1.31737e-26	yes
PARG18074	484.541	-2.43666	0.225868	125.07	6.94126e-28	1.31936e-26	yes
PARG25424	219.897	1.42608	0.355221	124.996	7.20213e-28	1.36747e-26	yes
PARG14933	601.295	-2.04095	0.205309	124.793	7.97088e-28	1.5118e-26	yes
PARG04026	2650.82	1.12413	0.151072	124.763	8.09283e-28	1.53328e-26	yes
PARG24068	289.376	2.47257	0.311804	124.738	8.19588e-28	1.55113e-26	yes
PARG29458	276.445	0.797073	0.377417	124.606	8.75394e-28	1.65496e-26	yes
PARG16194	813.136	1.0817	0.194839	124.6	8.77917e-28	1.65795e-26	yes
PARG22797	262.097	-0.707931	0.30667	124.451	9.46037e-28	1.78468e-26	yes
PARG00299	1521.49	0.72425	0.187618	124.059	1.15087e-27	2.16877e-26	yes
PARG21808	2204.38	-1.15471	0.273251	124.054	1.15345e-27	2.17131e-26	yes
PARG20177	373.559	1.49786	0.284914	123.997	1.18671e-27	2.23152e-26	yes
PARG16762	556.679	1.1016	0.224777	123.829	1.29079e-27	2.42465e-26	yes
PARG10724	976.995	0.367893	0.190403	123.789	1.31724e-27	2.47169e-26	yes
PARG00949	286.381	1.01953	0.272772	123.774	1.32664e-27	2.48667e-26	yes
PARG28090	458.292	-0.0411298	0.304329	123.63	1.42566e-27	2.66942e-26	yes
PARG07401	331.841	1.80053	0.321207	123.532	1.49751e-27	2.80098e-26	yes
PARG28155	252.922	2.70863	0.34211	123.471	1.54423e-27	2.88529e-26	yes
PARG03227	691.353	1.40182	0.203229	123.237	1.73536e-27	3.23896e-26	yes
PARG24221	974.907	-2.37177	0.231682	123.203	1.76503e-27	3.29085e-26	yes
PARG12494	11787.7	-0.102938	0.143099	122.901	2.05314e-27	3.82398e-26	yes
PARG29227	2091.81	1.89889	0.204444	122.898	2.05569e-27	3.82467e-26	yes
PARG16278	763.367	-1.40208	0.252441	122.8	2.15918e-27	4.01298e-26	yes
PARG07621	55.7162	9.5482	2.12218	122.738	2.22723e-27	4.13507e-26	yes
PARG13682	425.889	-1.92648	0.251696	122.655	2.32129e-27	4.30516e-26	yes
PARG00340	1169	1.02959	0.173074	122.612	2.37239e-27	4.39529e-26	yes
PARG20926	4833.62	-0.583284	0.154272	122.591	2.39672e-27	4.43571e-26	yes
PARG12183	1691.7	-0.824934	0.200176	122.435	2.59116e-27	4.79051e-26	yes
PARG21332	1421.48	0.646749	0.200557	122.19	2.92932e-27	5.41001e-26	yes
PARG00101	135.931	3.20622	0.759321	122.183	2.93929e-27	5.42272e-26	yes
PARG25230	1075.07	0.690748	0.206289	122.177	2.94863e-27	5.43425e-26	yes
PARG01741	223.363	1.11223	0.366998	122.121	3.03151e-27	5.58115e-26	yes
PARG27896	248.136	-0.612849	0.317395	121.932	3.33316e-27	6.13008e-26	yes
PARG27994	904.956	-1.87561	0.193791	121.893	3.39776e-27	6.24236e-26	yes
PARG24216	77.4073	3.52186	1.5359	121.887	3.40938e-27	6.25718e-26	yes
PARG06847	522.328	1.54795	0.237987	121.757	3.63661e-27	6.66725e-26	yes
PARG12185	839.632	-1.70905	0.197967	121.668	3.80307e-27	6.96516e-26	yes
PARG00578	420.468	-0.89096	0.336225	121.651	3.83477e-27	7.01591e-26	yes
PARG23651	691.705	0.552501	0.202575	121.601	3.93226e-27	7.1868e-26	yes
PARG06483	1509.58	-0.940868	0.210957	121.295	4.58252e-27	8.36654e-26	yes
PARG02418	3632.51	0.950758	0.145295	121.224	4.74788e-27	8.65947e-26	yes
PARG21106	116.256	3.05455	0.461554	121.062	5.14899e-27	9.3813e-26	yes
PARG08065	263.598	0.912861	0.290477	120.947	5.45294e-27	9.92481e-26	yes
PARG27603	199.894	2.61624	0.361506	120.93	5.49989e-27	9.99991e-26	yes
PARG02967	67.8379	5.80003	1.01527	120.728	6.08615e-27	1.10544e-25	yes
PARG28289	2648.95	-0.415265	0.156125	120.656	6.30803e-27	1.14456e-25	yes
PARG02151	3253.08	-1.31652	0.143939	120.306	7.51255e-27	1.36171e-25	yes
PARG21465	5985.81	-0.122271	0.136433	120.141	8.16086e-27	1.4777e-25	yes
PARG21515	119.114	3.65645	0.495443	120.078	8.42329e-27	1.52364e-25	yes
PARG28526	386.477	0.91458	0.240919	119.945	8.99891e-27	1.62609e-25	yes
PARG10364	102.138	-1.42582	0.664879	119.799	9.68112e-27	1.74757e-25	yes
PARG03981	5997.59	0.664282	0.155051	119.785	9.75227e-27	1.75861e-25	yes
PARG06400	327.556	-2.90559	0.283814	119.778	9.78634e-27	1.76294e-25	yes
PARG24290	361.816	-1.35508	0.27125	119.512	1.11746e-26	2.01097e-25	yes
PARG20943	187.661	1.37139	0.388521	119.48	1.13552e-26	2.04138e-25	yes
PARG06607	550.847	2.07282	0.254406	119.265	1.26437e-26	2.27071e-25	yes
PARG07062	744.753	0.965337	0.194482	119.078	1.38818e-26	2.49051e-25	yes
PARG19038	921.223	-0.0104041	0.186964	119.005	1.44042e-26	2.58159e-25	yes
PARG27271	734.743	-3.70639	0.348139	118.948	1.48165e-26	2.65279e-25	yes
PARG30050	179.303	1.24802	0.336694	118.913	1.50787e-26	2.69698e-25	yes
PARG19466	2163.97	-1.27093	0.210419	118.39	1.95829e-26	3.49905e-25	yes
PARG20716	219.41	0.963147	0.302487	118.349	1.99876e-26	3.56773e-25	yes
PARG26570	153.7	3.13947	0.440888	118.126	2.23514e-26	3.98563e-25	yes
PARG05863	1363.63	0.169301	0.203508	118.075	2.29255e-26	4.08385e-25	yes
PARG23859	1485.07	-0.817793	0.202668	118.014	2.36341e-26	4.20582e-25	yes
PARG25931	128.881	4.08919	0.538649	117.827	2.59578e-26	4.61466e-25	yes
PARG25438	182.236	-4.19278	0.41999	117.779	2.65776e-26	4.72008e-25	yes
PARG05479	1112.51	-0.60465	0.186012	117.694	2.77442e-26	4.92228e-25	yes
PARG20615	3185.17	-0.194721	0.165331	117.675	2.80039e-26	4.96336e-25	yes
PARG01618	240.749	2.10408	0.306347	117.548	2.98393e-26	5.28333e-25	yes
PARG01079	2795.61	1.06548	0.176568	117.386	3.23572e-26	5.72339e-25	yes
PARG18989	2221.4	-1.20927	0.164685	117.254	3.45662e-26	6.10797e-25	yes
PARG05721	664.756	0.413282	0.220939	117.097	3.73789e-26	6.59836e-25	yes
PARG05851	1390.15	0.179157	0.204784	117.074	3.78096e-26	6.66769e-25	yes
PARG01207	392.85	-1.3563	0.237435	116.696	4.56758e-26	8.04681e-25	yes
PARG06362	2309.02	1.87659	0.171849	116.616	4.75597e-26	8.37032e-25	yes
PARG05519	995.119	0.192414	0.200439	116.606	4.77935e-26	8.40305e-25	yes
PARG02982	9344.04	-0.985859	0.137168	116.584	4.8306e-26	8.48467e-25	yes
PARG27800	269.488	-0.151119	0.327346	116.52	4.98864e-26	8.75352e-25	yes
PARG08473	1033.81	-0.201844	0.204668	116.381	5.34886e-26	9.37624e-25	yes
PARG26938	194.934	1.64447	0.380324	116.368	5.38329e-26	9.42719e-25	yes
PARG02685	732.114	-0.14807	0.204342	116.346	5.44107e-26	9.5189e-25	yes
PARG23504	971.211	1.98737	0.224186	116.342	5.45199e-26	9.52852e-25	yes
PARG00106	425.773	1.21348	0.244589	116.295	5.58361e-26	9.74886e-25	yes
PARG26813	255.535	2.56453	0.346342	116.262	5.67649e-26	9.9012e-25	yes
PARG29284	537.617	1.93981	0.249383	115.828	7.05189e-26	1.2288e-24	yes
PARG06509	292.945	0.984553	0.269879	115.753	7.32145e-26	1.27451e-24	yes
PARG23110	486.614	1.66556	0.227194	115.745	7.35106e-26	1.2784e-24	yes
PARG15686	415.409	-0.283201	0.270481	115.705	7.49953e-26	1.30293e-24	yes
PARG09446	1640.56	0.715232	0.201196	115.664	7.65345e-26	1.32836e-24	yes
PARG07306	742.709	1.05001	0.224371	115.578	7.98828e-26	1.38511e-24	yes
PARG28297	7759.5	-0.0192756	0.134081	115.573	8.00944e-26	1.38741e-24	yes
PARG02920	169.008	1.02548	0.343934	115.535	8.16296e-26	1.41261e-24	yes
PARG18488	5077.81	0.673042	0.140765	115.403	8.71906e-26	1.50736e-24	yes
PARG11152	427.48	0.330193	0.230878	115.398	8.74458e-26	1.51029e-24	yes
PARG09192	722.344	2.40637	0.247969	115.195	9.67657e-26	1.66961e-24	yes
PARG00834	395.315	0.808465	0.239473	115.19	9.70141e-26	1.67226e-24	yes
PARG06562	457.752	1.92486	0.265054	115.109	1.01033e-25	1.73983e-24	yes
PARG28696	3452.99	-0.58962	0.168748	114.937	1.10069e-25	1.89358e-24	yes
PARG12888	431.452	2.31985	0.323926	114.88	1.13261e-25	1.94658e-24	yes
PARG19665	330.303	1.05346	0.262274	114.856	1.14648e-25	1.96851e-24	yes
PARG01114	226.154	-3.59906	0.584801	114.789	1.18529e-25	2.03315e-24	yes
PARG02078	3359.42	0.501738	0.186236	114.734	1.21868e-25	2.08839e-24	yes
PARG19868	2414.58	0.966746	0.16062	114.569	1.32337e-25	2.26558e-24	yes
PARG24102	422.379	1.86673	0.255975	114.319	1.49924e-25	2.56417e-24	yes
PARG09015	1697.78	1.27511	0.176291	114.309	1.50671e-25	2.57444e-24	yes
PARG08730	227.537	2.66335	0.457308	114.209	1.58402e-25	2.7039e-24	yes
PARG25715	1021.07	-1.82103	0.17701	114.055	1.71114e-25	2.91807e-24	yes
PARG09393	1529.05	1.76626	0.176652	113.892	1.85633e-25	3.1626e-24	yes
PARG06128	2189.6	1.2136	0.166053	113.83	1.91477e-25	3.259e-24	yes
PARG25302	181.436	-2.54505	0.360463	113.751	1.99226e-25	3.38762e-24	yes
PARG01676	906.944	1.45571	0.213374	113.604	2.14422e-25	3.64248e-24	yes
PARG20219	1665.27	-2.27406	0.228289	113.563	2.18776e-25	3.71286e-24	yes
PARG19653	1069.41	1.37148	0.181731	113.518	2.23799e-25	3.79444e-24	yes
PARG22944	5692.6	0.256133	0.154462	113.51	2.24671e-25	3.80556e-24	yes
PARG16035	376.274	0.634055	0.2958	113.463	2.30059e-25	3.89307e-24	yes
PARG27931	221.76	-3.26932	0.323095	113.395	2.37997e-25	4.02353e-24	yes
PARG13952	274.193	1.78664	0.329884	113.352	2.4318e-25	4.10719e-24	yes
PARG08506	3902.82	0.914048	0.150942	113.193	2.63282e-25	4.43818e-24	yes
PARG11097	842.25	1.62845	0.226942	113.195	2.6307e-25	4.43818e-24	yes
PARG04075	516.237	2.40921	0.251001	113.128	2.72041e-25	4.58144e-24	yes
PARG24546	292.591	0.702192	0.340814	113.118	2.73345e-25	4.59899e-24	yes
PARG11108	983.721	-0.769715	0.28487	112.768	3.25673e-25	5.47418e-24	yes
PARG02026	3174.74	-0.497197	0.228958	112.568	3.59919e-25	6.04402e-24	yes
PARG08527	7929.26	-0.973489	0.187404	112.426	3.86334e-25	6.48142e-24	yes
PARG24642	595.776	1.42734	0.212842	112.384	3.94537e-25	6.61272e-24	yes
PARG29278	594.635	2.94875	0.262206	112.345	4.02254e-25	6.73565e-24	yes
PARG21602	174.427	2.70823	0.367055	112.141	4.45474e-25	7.45225e-24	yes
PARG07990	657.563	2.97299	0.298454	112.128	4.48364e-25	7.49347e-24	yes
PARG18458	3220.4	-0.309083	0.148857	112.122	4.49814e-25	7.51057e-24	yes
PARG07413	1731.38	-0.144862	0.19361	112.007	4.76391e-25	7.94678e-24	yes
PARG05547	56.3905	9.5676	2.12744	111.987	4.81223e-25	8.01978e-24	yes
PARG08905	2261.2	0.496615	0.151415	111.813	5.24866e-25	8.73881e-24	yes
PARG03286	684.807	1.40159	0.219205	111.742	5.43915e-25	9.04742e-24	yes
PARG25127	457.929	-0.159115	0.240114	111.469	6.23543e-25	1.03621e-23	yes
PARG13239	188.602	0.956433	0.326349	111.222	7.05312e-25	1.17099e-23	yes
PARG30383	527.879	1.5942	0.225391	111.118	7.43082e-25	1.23254e-23	yes
PARG03635	281.441	-0.810019	0.332918	110.965	8.02238e-25	1.3294e-23	yes
PARG00646	766.423	-2.19167	0.215657	110.957	8.05363e-25	1.33332e-23	yes
PARG20248	574.475	-0.610985	0.223516	110.773	8.82829e-25	1.4602e-23	yes
PARG11426	1081.88	1.03174	0.187102	110.743	8.96151e-25	1.48084e-23	yes
PARG25305	2228.33	0.155915	0.153032	110.699	9.16077e-25	1.51234e-23	yes
PARG19754	534.367	0.360652	0.234967	110.688	9.21154e-25	1.5193e-23	yes
PARG21137	2258.01	-0.00491389	0.196299	110.634	9.46676e-25	1.55993e-23	yes
PARG09067	320.36	0.661226	0.261329	110.527	9.98671e-25	1.64407e-23	yes
PARG07659	276.078	2.00932	0.319683	110.501	1.01179e-24	1.66411e-23	yes
PARG28125	1714.75	1.09137	0.1664	110.47	1.02759e-24	1.68851e-23	yes
PARG15939	2249.57	0.964787	0.153972	110.383	1.07334e-24	1.76204e-23	yes
PARG10681	1934.06	0.0126208	0.153385	110.257	1.14263e-24	1.87404e-23	yes
PARG20274	7651.22	0.209432	0.152053	110.158	1.20116e-24	1.9682e-23	yes
PARG02821	117.109	-3.5037	0.445765	109.814	1.42658e-24	2.33539e-23	yes
PARG18304	433.971	1.70885	0.262801	109.754	1.46963e-24	2.40362e-23	yes
PARG12251	484.128	-0.656956	0.243984	109.618	1.57305e-24	2.57039e-23	yes
PARG09493	51.7952	6.99006	1.55146	109.556	1.62245e-24	2.64865e-23	yes
PARG11159	2885.6	-0.0318956	0.197417	109.551	1.62678e-24	2.65324e-23	yes
PARG22956	788.448	-0.680585	0.209915	109.447	1.71376e-24	2.79253e-23	yes
PARG03597	50.2638	9.39376	2.12378	109.443	1.71725e-24	2.79562e-23	yes
PARG24224	219.595	1.69152	0.324332	109.403	1.75196e-24	2.84948e-23	yes
PARG20931	113.96	0.733142	0.632727	109.391	1.76256e-24	2.86408e-23	yes
PARG20630	4220.29	-1.25225	0.180521	109.319	1.82691e-24	2.9659e-23	yes
PARG10515	141.686	-3.93099	0.404291	109.301	1.8433e-24	2.98976e-23	yes
PARG19524	2834.86	-1.06935	0.17398	109.264	1.87752e-24	3.04245e-23	yes
PARG15948	83.6649	6.04328	0.974083	109.199	1.94011e-24	3.14098e-23	yes
PARG11153	1309.55	1.2349	0.171237	109.163	1.97465e-24	3.19395e-23	yes
PARG24964	736.306	1.17479	0.225406	109.16	1.978e-24	3.19644e-23	yes
PARG18823	1818.29	1.03914	0.171092	109.032	2.10866e-24	3.40446e-23	yes
PARG13352	6819.26	0.70844	0.138191	108.988	2.15538e-24	3.47669e-23	yes
PARG11592	591.403	-1.35415	0.216998	108.939	2.20887e-24	3.55971e-23	yes
PARG19135	674.135	0.0919965	0.208171	108.915	2.23512e-24	3.5987e-23	yes
PARG18623	1007.9	0.760634	0.17875	108.873	2.2833e-24	3.67292e-23	yes
PARG00710	3614.82	1.18701	0.206418	108.627	2.5819e-24	4.14944e-23	yes
PARG24195	173.931	1.7543	0.364755	108.454	2.81482e-24	4.51965e-23	yes
PARG16259	845.333	1.06194	0.198087	108.342	2.97667e-24	4.77517e-23	yes
PARG13624	321.168	1.66578	0.301965	108.273	3.08194e-24	4.93953e-23	yes
PARG07114	506.672	-2.28436	0.234042	108.192	3.20867e-24	5.13796e-23	yes
PARG05805	156.568	-1.67139	0.394848	108.067	3.41624e-24	5.46537e-23	yes
PARG23739	46.3562	9.28481	2.13004	107.873	3.7637e-24	6.01576e-23	yes
PARG19947	690.442	0.564975	0.215317	107.76	3.98303e-24	6.36054e-23	yes
PARG11341	987.132	0.573289	0.210139	107.746	4.01181e-24	6.4007e-23	yes
PARG10694	2017.96	4.76403	0.585173	107.725	4.05419e-24	6.46244e-23	yes
PARG15133	1086.89	1.50597	0.226023	107.62	4.27127e-24	6.8023e-23	yes
PARG19489	290.183	0.509718	0.266427	107.552	4.41924e-24	7.03159e-23	yes
PARG02287	832.366	-0.975286	0.20082	107.518	4.49478e-24	7.14533e-23	yes
PARG28868	755.382	1.30016	0.207319	107.516	4.50019e-24	7.14746e-23	yes
PARG09947	1321.5	-0.152786	0.19049	107.513	4.50712e-24	7.152e-23	yes
PARG21186	3377.42	-1.23546	0.208517	107.509	4.51578e-24	7.15928e-23	yes
PARG23829	138.221	2.03155	0.424534	107.461	4.62555e-24	7.32671e-23	yes
PARG26445	262.491	1.11442	0.291179	107.36	4.86372e-24	7.69703e-23	yes
PARG21264	126.385	-4.33758	0.455788	107.259	5.11584e-24	8.08873e-23	yes
PARG06473	6606.56	0.950832	0.134038	107.161	5.37512e-24	8.49105e-23	yes
PARG11249	129.2	1.34455	0.407824	107.091	5.56571e-24	8.78422e-23	yes
PARG20204	910.662	2.27867	0.219683	107.05	5.68041e-24	8.95722e-23	yes
PARG14213	456.59	1.15817	0.258353	106.923	6.05265e-24	9.53563e-23	yes
PARG24006	1255.3	1.15529	0.178772	106.855	6.26095e-24	9.85497e-23	yes
PARG07793	2946.32	0.0945779	0.146924	106.71	6.73146e-24	1.05861e-22	yes
PARG30030	647.718	1.41844	0.213805	106.687	6.80957e-24	1.06994e-22	yes
PARG20005	4030.66	-0.858822	0.140007	106.636	6.98811e-24	1.09701e-22	yes
PARG27039	1517.52	-1.09259	0.27076	106.605	7.09699e-24	1.11311e-22	yes
PARG19866	1832.76	-1.24031	0.177047	106.356	8.03791e-24	1.25956e-22	yes
PARG20504	1365.6	0.724197	0.199833	106.173	8.80597e-24	1.37869e-22	yes
PARG12600	3339.15	-1.56956	0.24482	106.049	9.372e-24	1.466e-22	yes
PARG23746	60.7975	0.57184	1.27904	105.761	1.08195e-23	1.69091e-22	yes
PARG25180	695.401	0.95877	0.200028	105.739	1.0942e-23	1.70855e-22	yes
PARG24193	82.4736	3.4718	0.567158	105.726	1.10129e-23	1.71809e-22	yes
PARG18141	602.133	1.64195	0.254174	105.667	1.13435e-23	1.7681e-22	yes
PARG03180	113.387	-3.79321	0.429355	105.637	1.15147e-23	1.78951e-22	yes
PARG19900	366.473	0.0627279	0.243506	105.639	1.15044e-23	1.78951e-22	yes
PARG25189	668.227	1.56373	0.225095	105.637	1.1513e-23	1.78951e-22	yes
PARG27653	2139.23	-1.45972	0.221349	105.636	1.15216e-23	1.78951e-22	yes
PARG07054	1840.11	-1.09307	0.157913	105.549	1.20299e-23	1.86681e-22	yes
PARG03630	4012.25	0.0461193	0.147271	105.522	1.21972e-23	1.8911e-22	yes
PARG15386	71.6567	9.8543	2.1095	105.501	1.23264e-23	1.90946e-22	yes
PARG29153	4454.53	-1.33452	0.167002	105.412	1.28861e-23	1.99439e-22	yes
PARG13646	197.372	2.11129	0.343781	105.341	1.33533e-23	2.06488e-22	yes
PARG20509	538.166	-0.603427	0.221889	105.294	1.36694e-23	2.1119e-22	yes
PARG27131	791.357	-1.62717	0.310323	105.131	1.48293e-23	2.28911e-22	yes
PARG10287	5391.18	-0.520285	0.145638	105.125	1.48734e-23	2.2939e-22	yes
PARG13867	599.604	-0.162632	0.212888	105.12	1.49115e-23	2.29776e-22	yes
PARG22007	527.112	-1.06262	0.221125	105.101	1.50538e-23	2.31765e-22	yes
PARG07845	1775.37	0.108046	0.168352	104.751	1.79288e-23	2.75787e-22	yes
PARG04299	1371.87	-0.625333	0.19855	104.68	1.85792e-23	2.85386e-22	yes
PARG20161	1438.94	0.406451	0.170999	104.679	1.85853e-23	2.85386e-22	yes
PARG16136	3279.18	-3.15705	0.542673	104.677	1.86101e-23	2.85518e-22	yes
PARG08615	362.679	1.19962	0.256923	104.658	1.87839e-23	2.87932e-22	yes
PARG15773	73.332	3.84203	0.643761	104.599	1.93495e-23	2.96343e-22	yes
PARG14314	1684.29	-1.27931	0.182389	104.539	1.9934e-23	3.05031e-22	yes
PARG27774	749.499	0.414993	0.272876	104.501	2.03193e-23	3.10656e-22	yes
PARG27654	278.169	-2.74774	0.282733	104.478	2.05494e-23	3.139e-22	yes
PARG19170	862.769	-2.32932	0.242884	104.41	2.12687e-23	3.24606e-22	yes
PARG11090	390.768	2.44816	0.314272	104.351	2.18991e-23	3.33937e-22	yes
PARG02401	72686.6	0.669167	0.221563	104.325	2.21872e-23	3.38038e-22	yes
PARG04415	559.052	1.47502	0.233492	104.265	2.28652e-23	3.48065e-22	yes
PARG08908	701.511	-0.158301	0.734505	104.243	2.31196e-23	3.51634e-22	yes
PARG14643	495.561	-0.0531969	0.301414	104.168	2.39965e-23	3.64656e-22	yes
PARG11139	84.9411	2.03021	0.49529	104.138	2.43621e-23	3.69891e-22	yes
PARG01927	183.812	-4.59265	0.561717	103.86	2.79896e-23	4.24601e-22	yes
PARG21488	342.656	0.808893	0.277876	103.849	2.81482e-23	4.26639e-22	yes
PARG11945	299.111	3.36151	0.340445	103.829	2.84392e-23	4.30679e-22	yes
PARG24386	987.484	-1.51803	0.199873	103.783	2.90906e-23	4.40165e-22	yes
PARG23113	2957.87	-0.453184	0.167976	103.775	2.92062e-23	4.41153e-22	yes
PARG23240	686.345	-0.233639	0.204723	103.777	2.91872e-23	4.41153e-22	yes
PARG12470	375.132	0.27156	0.240715	103.672	3.07516e-23	4.64099e-22	yes
PARG21793	1127	-0.595729	0.226445	103.552	3.266e-23	4.92478e-22	yes
PARG12393	711.173	-1.89523	0.200991	103.277	3.74644e-23	5.64439e-22	yes
PARG26784	959.444	1.1603	0.181214	103.173	3.94632e-23	5.94043e-22	yes
PARG22550	627.506	-1.44165	0.221324	103.129	4.03554e-23	6.06953e-22	yes
PARG04568	130.631	2.84951	0.450553	103.095	4.10431e-23	6.16769e-22	yes
PARG07072	2750.98	-0.0427654	0.208642	102.995	4.31357e-23	6.47662e-22	yes
PARG03494	106.188	2.38375	0.461923	102.934	4.44714e-23	6.67147e-22	yes
PARG20346	81.5005	5.5747	0.875229	102.899	4.52729e-23	6.78592e-22	yes
PARG05911	192.136	1.0958	0.32815	102.883	4.56214e-23	6.83233e-22	yes
PARG13082	120.253	4.38826	0.60486	102.79	4.77983e-23	7.15225e-22	yes
PARG27333	1562.06	-0.0628639	0.17563	102.697	5.00764e-23	7.48676e-22	yes
PARG21173	925.546	0.646703	0.221762	102.681	5.04668e-23	7.53872e-22	yes
PARG02954	278.89	1.43814	0.278449	102.622	5.19836e-23	7.7587e-22	yes
PARG21822	436.639	1.63301	0.237767	102.601	5.25499e-23	7.83658e-22	yes
PARG04182	156.159	-0.521686	0.357376	102.373	5.88815e-23	8.77334e-22	yes
PARG24573	1982.7	0.0629811	0.183395	102.334	6.00368e-23	8.93791e-22	yes
PARG03137	920.758	1.42395	0.194012	102.313	6.06858e-23	9.02688e-22	yes
PARG08599	622.849	-0.262222	0.227879	102.307	6.08667e-23	9.04615e-22	yes
PARG15204	6099.15	-1.34593	0.194535	101.979	7.17106e-23	1.06488e-21	yes
PARG05652	43.4751	9.19461	2.13476	101.947	7.28755e-23	1.08126e-21	yes
PARG29494	1380.4	0.847928	0.169488	101.943	7.30099e-23	1.08234e-21	yes
PARG18964	640.285	0.525391	0.200838	101.786	7.89779e-23	1.16983e-21	yes
PARG22913	1881.49	-1.35121	0.155265	101.627	8.55114e-23	1.26554e-21	yes
PARG18919	1974.02	0.912567	0.157334	101.604	8.6478e-23	1.27877e-21	yes
PARG19722	75.5763	5.9315	1.01214	101.587	8.72185e-23	1.28864e-21	yes
PARG06995	812.784	1.11402	0.227201	101.454	9.32497e-23	1.37659e-21	yes
PARG07047	541.543	1.79837	0.240773	101.415	9.50565e-23	1.40208e-21	yes
PARG06788	248.968	-3.16323	0.325582	101.406	9.55021e-23	1.40748e-21	yes
PARG19750	592.054	0.722812	0.224146	101.301	1.00637e-22	1.48191e-21	yes
PARG27932	821.044	1.84587	0.211919	100.78	1.30614e-22	1.92172e-21	yes
PARG15759	508.343	-2.05458	0.240414	100.776	1.30831e-22	1.9233e-21	yes
PARG29156	58.2168	5.53896	0.984487	100.733	1.33692e-22	1.96372e-21	yes
PARG12599	1986.02	1.58337	0.185288	100.566	1.45334e-22	2.13294e-21	yes
PARG28173	1162.67	-1.11351	0.30571	100.525	1.48352e-22	2.17542e-21	yes
PARG01564	162.18	-0.439948	0.430595	100.5	1.50238e-22	2.20124e-21	yes
PARG21521	809.876	-1.09837	0.232898	100.385	1.59069e-22	2.32869e-21	yes
PARG08601	5328.45	1.00323	0.137786	100.38	1.59537e-22	2.33359e-21	yes
PARG00172	1614.14	1.61827	0.180463	100.355	1.61519e-22	2.36063e-21	yes
PARG01206	482.38	-2.1426	0.234051	100.346	1.62227e-22	2.369e-21	yes
PARG14110	748.733	0.170348	0.211447	100.222	1.72599e-22	2.51836e-21	yes
PARG06900	1772.27	-0.723967	0.183851	100.22	1.72801e-22	2.51922e-21	yes
PARG08332	490.887	-1.75798	0.25737	100.164	1.77708e-22	2.58862e-21	yes
PARG11423	1882.81	-0.957685	0.168801	100.103	1.83185e-22	2.6662e-21	yes
PARG19897	94.9578	4.26473	0.609003	99.9882	1.94019e-22	2.82154e-21	yes
PARG28064	549.181	-0.0722304	0.231984	99.9616	1.96617e-22	2.85696e-21	yes
PARG02772	1423.63	1.62485	0.271415	99.9172	2.01031e-22	2.91869e-21	yes
PARG03517	2734.22	-1.39952	0.145845	99.8677	2.06063e-22	2.98928e-21	yes
PARG04348	456.463	1.07208	0.298285	99.8322	2.09756e-22	3.04034e-21	yes
PARG09019	132.053	-1.71959	0.435919	99.7215	2.21693e-22	3.21071e-21	yes
PARG12958	9933.79	0.196257	0.141462	99.7186	2.22015e-22	3.21273e-21	yes
PARG14184	4637.96	-0.40684	0.137201	99.7006	2.24022e-22	3.23911e-21	yes
PARG07105	233.99	-0.233005	0.343385	99.6226	2.32926e-22	3.36508e-21	yes
PARG12601	1440.51	-0.864189	0.174092	99.6059	2.34881e-22	3.39054e-21	yes
PARG10753	374.727	-1.6695	0.298718	99.5962	2.36031e-22	3.40435e-21	yes
PARG19989	806.576	1.64583	0.201177	99.4242	2.57229e-22	3.70705e-21	yes
PARG24080	1107.26	-0.153739	0.188276	99.1436	2.95967e-22	4.26183e-21	yes
PARG01643	1200.78	-1.1423	0.292959	99.1413	2.96306e-22	4.26322e-21	yes
PARG19881	189.235	-3.44275	0.361294	99.0541	3.09517e-22	4.44965e-21	yes
PARG29547	450.493	-1.36331	0.268028	98.9227	3.30521e-22	4.74773e-21	yes
PARG20979	728.798	-1.52989	0.236249	98.8846	3.36892e-22	4.83529e-21	yes
PARG00895	15117.2	-0.583183	0.147112	98.8098	3.49727e-22	5.01542e-21	yes
PARG12331	459.727	1.60761	0.283273	98.7676	3.57185e-22	5.1182e-21	yes
PARG23108	322.777	1.47003	0.281837	98.7185	3.66053e-22	5.24099e-21	yes
PARG18485	945.641	-0.0565125	0.185631	98.5754	3.93208e-22	5.62521e-21	yes
PARG01263	168.586	-1.88397	0.377355	98.4992	4.08475e-22	5.83887e-21	yes
PARG28433	129.542	-4.77122	0.635283	98.4541	4.17786e-22	5.96711e-21	yes
PARG20951	834.171	0.0659976	0.211972	98.4252	4.23873e-22	6.04914e-21	yes
PARG29269	3551.14	-1.42884	0.152474	98.385	4.32473e-22	6.16686e-21	yes
PARG24445	4024.01	-1.52587	0.159533	98.3815	4.33247e-22	6.1729e-21	yes
PARG23614	825.494	1.91609	0.24015	98.3652	4.3678e-22	6.21819e-21	yes
PARG19386	8490.29	-1.43552	0.150149	98.3576	4.3844e-22	6.23678e-21	yes
PARG00730	3093.57	1.31513	0.165948	98.3318	4.44135e-22	6.31268e-21	yes
PARG09190	654.95	-2.32165	0.262271	98.23	4.67324e-22	6.63691e-21	yes
PARG23878	1014.74	0.676342	0.19595	98.0663	5.07181e-22	7.19714e-21	yes
PARG26957	161.243	-2.97618	0.358733	98.0628	5.08083e-22	7.20413e-21	yes
PARG27379	154.476	-3.36139	0.365051	97.9974	5.24973e-22	7.43761e-21	yes
PARG27365	3416.37	0.850675	0.151871	97.8769	5.57561e-22	7.89295e-21	yes
PARG21776	611.442	-0.991095	0.256893	97.8736	5.585e-22	7.89987e-21	yes
PARG06996	517.636	1.36977	0.229524	97.7518	5.93552e-22	8.38893e-21	yes
PARG21232	360.482	3.12324	0.309535	97.7417	5.96572e-22	8.42484e-21	yes
PARG01120	9615.36	0.33812	0.154257	97.7382	5.97607e-22	8.43268e-21	yes
PARG20930	359.367	1.62699	0.323273	97.7172	6.03934e-22	8.51513e-21	yes
PARG23596	646.832	-1.07871	0.213568	97.711	6.05796e-22	8.53454e-21	yes
PARG20800	2643.86	-2.12997	0.244272	97.6705	6.18178e-22	8.702e-21	yes
PARG23971	647.778	-0.0417765	0.2443	97.5848	6.45262e-22	9.07599e-21	yes
PARG10102	1444.02	-0.872508	0.198858	97.5105	6.69689e-22	9.41205e-21	yes
PARG19183	487.341	2.13472	0.31407	97.5042	6.71792e-22	9.43407e-21	yes
PARG03553	426.15	1.04949	0.233368	97.5002	6.73136e-22	9.4454e-21	yes
PARG19691	357.402	-2.20665	0.256171	97.4802	6.79899e-22	9.53269e-21	yes
PARG24769	2311.99	0.841933	0.152559	97.4127	7.03218e-22	9.85178e-21	yes
PARG04114	672.507	1.96701	0.216515	97.3462	7.27009e-22	1.0177e-20	yes
PARG20580	512.764	-1.98237	0.24053	97.2709	7.54899e-22	1.0559e-20	yes
PARG15257	280.639	1.94438	0.302127	97.206	7.79788e-22	1.08984e-20	yes
PARG00957	770.178	1.51842	0.201073	97.1678	7.94828e-22	1.10998e-20	yes
PARG20401	1139.2	0.16317	0.171412	97.0675	8.3572e-22	1.16616e-20	yes
PARG10064	4074.93	-1.69418	0.208178	96.8359	9.3833e-22	1.3083e-20	yes
PARG12163	1896.44	0.705727	0.16198	96.7871	9.61506e-22	1.33956e-20	yes
PARG04069	196.174	3.63977	0.463147	96.6814	1.01368e-21	1.41112e-20	yes
PARG05777	978.27	-1.66728	0.186678	96.6664	1.02129e-21	1.4206e-20	yes
PARG20118	2178.31	0.972917	0.190393	96.5836	1.06447e-21	1.47949e-20	yes
PARG19805	993.079	0.128233	0.184676	96.5406	1.08763e-21	1.51049e-20	yes
PARG02947	1771.66	-2.35651	0.25081	96.4849	1.11831e-21	1.55186e-20	yes
PARG08351	1808.98	-0.494202	0.194623	96.3736	1.1823e-21	1.63937e-20	yes
PARG05830	267.937	1.65346	0.296164	96.3441	1.19989e-21	1.66245e-20	yes
PARG19757	261.279	1.07612	0.318057	96.2698	1.24533e-21	1.72404e-20	yes
PARG20349	5730.32	0.904137	0.1618	96.0638	1.38044e-21	1.90959e-20	yes
PARG00361	1367.39	-0.448388	0.271399	96.0529	1.38799e-21	1.91701e-20	yes
PARG06244	2882.39	-0.88765	0.203388	96.054	1.38718e-21	1.91701e-20	yes
PARG07913	232.387	-2.80935	0.324172	95.7699	1.59895e-21	2.20665e-20	yes
PARG12831	3124.32	-0.2725	0.15245	95.7676	1.60074e-21	2.20739e-20	yes
PARG03607	42.3932	9.15417	2.14285	95.6742	1.6773e-21	2.31115e-20	yes
PARG21341	477.504	1.58259	0.229754	95.6634	1.68635e-21	2.32181e-20	yes
PARG23901	1909.67	-0.365797	0.162512	95.6586	1.69043e-21	2.32559e-20	yes
PARG18206	697.274	1.41434	0.25932	95.625	1.71912e-21	2.36321e-20	yes
PARG06969	254.748	-1.37338	0.352086	95.573	1.76436e-21	2.42352e-20	yes
PARG20553	620.646	-1.81759	0.218316	95.5249	1.8073e-21	2.48056e-20	yes
PARG12200	1514.46	1.05443	0.162732	95.4836	1.84501e-21	2.53034e-20	yes
PARG13735	409.594	0.202311	0.269512	95.4103	1.91386e-21	2.62272e-20	yes
PARG16195	21299.3	-0.28744	0.154763	95.387	1.9363e-21	2.6514e-20	yes
PARG08677	1192.73	-0.723071	0.214383	95.3502	1.97225e-21	2.69853e-20	yes
PARG05487	169.234	0.411064	0.474043	95.2504	2.07315e-21	2.83218e-20	yes
PARG10953	2100.04	1.41955	0.16182	95.251	2.07259e-21	2.83218e-20	yes
PARG11331	434.654	0.818019	0.230771	95.1576	2.17166e-21	2.96445e-20	yes
PARG07452	5534.59	1.878	0.182911	95.1428	2.18782e-21	2.9842e-20	yes
PARG12614	78.5053	3.77306	0.603066	95.0499	2.29176e-21	3.12354e-20	yes
PARG22086	634.354	1.21832	0.242217	94.9573	2.40037e-21	3.26904e-20	yes
PARG24487	484.252	1.14195	0.226258	94.9453	2.41483e-21	3.28618e-20	yes
PARG12357	334.821	0.839406	0.258061	94.8528	2.52913e-21	3.43641e-20	yes
PARG18432	1717.97	0.496969	0.170661	94.8539	2.52772e-21	3.43641e-20	yes
PARG00885	84.7379	4.12199	1.54558	94.7847	2.61678e-21	3.55276e-20	yes
PARG10764	886.307	0.935587	0.203999	94.7365	2.68063e-21	3.63664e-20	yes
PARG23453	1944.72	-1.33993	0.252378	94.7063	2.72141e-21	3.68912e-20	yes
PARG10880	3570.83	1.3079	0.141991	94.5451	2.94977e-21	3.99252e-20	yes
PARG26577	545.572	1.10601	0.221693	94.5457	2.94885e-21	3.99252e-20	yes
PARG19512	357.083	0.725582	0.282694	94.429	3.12603e-21	4.22783e-20	yes
PARG30105	2658.65	-0.0197733	0.159367	94.3786	3.20593e-21	4.33256e-20	yes
PARG27841	938.777	0.464103	0.19773	94.3444	3.26116e-21	4.40382e-20	yes
PARG19204	3645.63	-1.42283	0.155136	94.3141	3.3109e-21	4.46755e-20	yes
PARG18944	18500.5	-0.153726	0.214104	94.2826	3.36351e-21	4.53506e-20	yes
PARG00365	1222.8	-1.59702	0.213274	94.1694	3.55931e-21	4.79539e-20	yes
PARG06135	423.387	-1.59821	0.261427	94.1306	3.62919e-21	4.88579e-20	yes
PARG20697	172.548	1.0429	0.334853	94.0897	3.70409e-21	4.98281e-20	yes
PARG05299	648.544	1.23542	0.203143	93.9882	3.89693e-21	5.23822e-20	yes
PARG17078	820.674	-1.10176	0.197303	93.9326	4.0067e-21	5.38165e-20	yes
PARG06113	1964.85	-0.562252	0.158959	93.8095	4.26104e-21	5.71891e-20	yes
PARG02682	505.97	1.50903	0.234611	93.7211	4.45362e-21	5.97282e-20	yes
PARG02330	3545.19	1.07376	0.141707	93.718	4.46064e-21	5.97767e-20	yes
PARG18740	1777.7	1.29009	0.163792	93.6781	4.55046e-21	6.09338e-20	yes
PARG05695	231.429	3.09683	0.55284	93.6752	4.5572e-21	6.09777e-20	yes
PARG15912	2038.9	-0.0457738	0.182055	93.5589	4.82997e-21	6.45784e-20	yes
PARG18300	2016.43	-0.301008	0.198722	93.5296	4.90127e-21	6.54819e-20	yes
PARG07165	399.774	0.624937	0.256135	93.498	4.9793e-21	6.64738e-20	yes
PARG07033	725.251	-1.20686	0.196749	93.4337	5.14185e-21	6.85918e-20	yes
PARG23884	1948.43	-0.334885	0.183999	93.3099	5.47024e-21	7.29171e-20	yes
PARG03267	218.86	-3.73279	0.397365	93.2033	5.76985e-21	7.68526e-20	yes
PARG03289	106.19	2.00603	0.439873	93.1969	5.78842e-21	7.70416e-20	yes
PARG23560	679.777	0.670996	0.203388	93.1528	5.91722e-21	7.86963e-20	yes
PARG24755	1432.23	-1.0605	0.161031	93.1391	5.9581e-21	7.91801e-20	yes
PARG06539	205.888	2.85061	0.349394	93.0685	6.17214e-21	8.19627e-20	yes
PARG25577	700.751	-1.0678	0.210652	92.9956	6.40105e-21	8.49383e-20	yes
PARG07142	3506.21	-0.200259	0.1485	92.9341	6.60104e-21	8.7526e-20	yes
PARG18893	1276.4	-0.630932	0.171062	92.9252	6.6307e-21	8.7853e-20	yes
PARG06867	563.249	-0.946401	0.318938	92.8705	6.81438e-21	9.02187e-20	yes
PARG05884	545.245	0.338219	0.224966	92.8559	6.86416e-21	9.07997e-20	yes
PARG27763	168.972	-4.44632	0.476721	92.8547	6.86859e-21	9.07997e-20	yes
PARG22185	1301.32	-1.45769	0.181619	92.7552	7.21865e-21	9.53556e-20	yes
PARG20644	3187.34	1.06334	0.142425	92.7444	7.25784e-21	9.58014e-20	yes
PARG28272	165.209	1.79661	0.353793	92.6378	7.65514e-21	1.0097e-19	yes
PARG19222	398.358	1.8603	0.298581	92.6226	7.71351e-21	1.01663e-19	yes
PARG00338	389.505	1.7714	0.28724	92.5889	7.84457e-21	1.03313e-19	yes
PARG03567	5642.55	-3.58153	0.518548	92.567	7.93101e-21	1.04373e-19	yes
PARG05642	437.931	0.30931	0.249187	92.5296	8.08069e-21	1.06264e-19	yes
PARG02355	4023.1	0.264	0.149284	92.5253	8.09832e-21	1.06416e-19	yes
PARG01289	578.508	1.97807	0.269089	92.517	8.13164e-21	1.06774e-19	yes
PARG20331	110.105	1.71698	0.423727	92.4981	8.20902e-21	1.0771e-19	yes
PARG06695	2337.4	-0.743336	0.15505	92.4909	8.23852e-21	1.08016e-19	yes
PARG23571	108.201	-0.173093	0.59677	92.4691	8.32893e-21	1.0912e-19	yes
PARG16037	442.374	2.33848	0.435833	92.385	8.68659e-21	1.13721e-19	yes
PARG20876	609.504	0.87944	0.214798	92.3439	8.86715e-21	1.15999e-19	yes
PARG00705	3025.69	-1.50529	0.173174	92.2687	9.2068e-21	1.20352e-19	yes
PARG07079	593.314	4.82823	0.703455	92.2043	9.50793e-21	1.24196e-19	yes
PARG14129	3335.93	0.330953	0.141582	92.1406	9.81586e-21	1.28124e-19	yes
PARG00174	3142.69	0.856699	0.169983	92.1363	9.8371e-21	1.28306e-19	yes
PARG02306	4002.15	-1.22047	0.159362	91.8797	1.11837e-20	1.45761e-19	yes
PARG27830	751.185	0.852511	0.298604	91.8401	1.1407e-20	1.48562e-19	yes
PARG00480	358.697	-3.62797	0.395112	91.7929	1.16793e-20	1.51995e-19	yes
PARG02115	3556.45	0.144558	0.154775	91.6961	1.22587e-20	1.59417e-19	yes
PARG18581	202.663	2.44429	0.354837	91.6584	1.24921e-20	1.62333e-19	yes
PARG02280	892.438	-1.0249	0.193946	91.6068	1.28183e-20	1.66448e-19	yes
PARG21211	4803.48	1.52151	0.188828	91.5071	1.34735e-20	1.74827e-19	yes
PARG05168	4782.2	-0.152131	0.157303	91.4957	1.35508e-20	1.75611e-19	yes
PARG16121	587.028	1.61489	0.222636	91.4952	1.35539e-20	1.75611e-19	yes
PARG00098	1142.51	1.12931	0.174849	91.4503	1.38616e-20	1.79465e-19	yes
PARG29164	187.471	-4.61693	0.49377	91.4399	1.39343e-20	1.80274e-19	yes
PARG28199	403.968	1.73954	0.246779	91.3692	1.44354e-20	1.8662e-19	yes
PARG24575	1050.13	-0.296801	0.224252	91.3189	1.48029e-20	1.91231e-19	yes
PARG08739	1397.57	-0.890805	0.262474	91.2722	1.51527e-20	1.95605e-19	yes
PARG27799	241.524	1.23279	0.305411	91.1567	1.60535e-20	2.07082e-19	yes
PARG08688_DAM2	178.707	-2.65283	0.586161	37.6646	0.000399261	2.26499e-19	yes
PARG10366	1666.37	-0.114081	0.164383	90.9546	1.77604e-20	2.28932e-19	yes
PARG19566	3356.61	0.593076	0.208533	90.9388	1.79012e-20	2.30577e-19	yes
PARG01080	743.613	0.713327	0.20229	90.8633	1.859e-20	2.39275e-19	yes
PARG18819	326.755	-2.83695	0.347803	90.8363	1.88429e-20	2.42352e-19	yes
PARG26414	1519.4	-0.420743	0.174889	90.7698	1.94803e-20	2.50368e-19	yes
PARG06415	567.948	1.11846	0.226766	90.7166	2.00049e-20	2.56921e-19	yes
PARG03744	113.578	1.21596	0.423918	90.5311	2.19496e-20	2.81692e-19	yes
PARG04464	1473.14	0.730139	0.170417	90.5005	2.22881e-20	2.85827e-19	yes
PARG19632	3197.03	1.14829	0.177526	90.2082	2.57953e-20	3.30563e-19	yes
PARG14162	61.1407	5.63807	1.04969	90.1985	2.59201e-20	3.31921e-19	yes
PARG01046	364.544	-0.065821	0.277665	90.1688	2.63087e-20	3.36652e-19	yes
PARG21701	1390.2	0.71179	0.172207	90.1442	2.66333e-20	3.40558e-19	yes
PARG25096	391.611	1.53398	0.281986	90.1291	2.68358e-20	3.42897e-19	yes
PARG27343	492.01	0.862079	0.272782	90.1103	2.70895e-20	3.45888e-19	yes
PARG26785	472.414	1.42873	0.242249	90.0923	2.7334e-20	3.48757e-19	yes
PARG28076	447.967	0.633944	0.230274	89.9717	2.90329e-20	3.70165e-19	yes
PARG06114	3682	-0.598665	0.163778	89.9607	2.91926e-20	3.71931e-19	yes
PARG29382	1393.52	-0.733383	0.169049	89.928	2.96741e-20	3.77791e-19	yes
PARG25201	2316.9	-1.49226	0.165014	89.9123	2.9909e-20	3.80506e-19	yes
PARG02336	920.54	-0.94748	0.183364	89.8838	3.03373e-20	3.85676e-19	yes
PARG01083	2048.38	0.955662	0.160812	89.7776	3.19917e-20	4.06415e-19	yes
PARG24414	1318.82	-1.96599	0.215638	89.7454	3.2511e-20	4.12714e-19	yes
PARG02055	897.834	0.749095	0.190989	89.6971	3.33065e-20	4.22507e-19	yes
PARG03147	490.682	-2.24852	0.253912	89.4471	3.7741e-20	4.78416e-19	yes
PARG01043	77.5007	3.97921	0.625086	89.3958	3.87212e-20	4.90134e-19	yes
PARG28078	479.175	1.09	0.233642	89.3962	3.87131e-20	4.90134e-19	yes
PARG03491	93.671	2.37534	0.493384	89.3452	3.9714e-20	5.02339e-19	yes
PARG14217	1220.02	1.00284	0.176066	89.3433	3.97515e-20	5.02452e-19	yes
PARG26752	568.927	0.939606	0.229235	89.3284	4.00478e-20	5.05834e-19	yes
PARG16202	936.523	1.77926	0.216856	89.2288	4.20927e-20	5.31281e-19	yes
PARG06041	1832.76	-0.166842	0.202187	89.169	4.33701e-20	5.46619e-19	yes
PARG25944	125.889	3.7036	0.499975	89.1701	4.33477e-20	5.46619e-19	yes
PARG22901	859.235	1.32456	0.209532	89.1168	4.45171e-20	5.60673e-19	yes
PARG25832	378.822	1.6381	0.254344	89.0705	4.55609e-20	5.73409e-19	yes
PARG29493	1062.71	-1.8411	0.214092	89.0398	4.62655e-20	5.8186e-19	yes
PARG20456	342.988	-0.590782	0.279413	89.0084	4.69977e-20	5.90645e-19	yes
PARG13683	5160.17	-1.56902	0.477072	88.9911	4.74051e-20	5.9534e-19	yes
PARG08489	1263.01	-0.717389	0.179185	88.989	4.74557e-20	5.9555e-19	yes
PARG10469	7701.44	0.288411	0.137955	88.9864	4.75178e-20	5.95905e-19	yes
PARG29805	1450.42	1.73753	0.173953	88.8677	5.0423e-20	6.31887e-19	yes
PARG10960	7863.23	1.73823	0.193522	88.8607	5.05985e-20	6.33635e-19	yes
PARG10466	3023.4	-1.29716	0.146873	88.8569	5.06966e-20	6.34411e-19	yes
PARG27302	916.089	0.626468	0.20765	88.8319	5.13325e-20	6.41911e-19	yes
PARG24508	351.563	1.39861	0.257501	88.7388	5.37801e-20	6.72041e-19	yes
PARG18974	141.622	-3.99482	0.546132	88.7325	5.39495e-20	6.73679e-19	yes
PARG06544	7378.86	-0.435624	0.131699	88.5787	5.82625e-20	7.2702e-19	yes
PARG03156	298.733	1.10871	0.277619	88.4656	6.16509e-20	7.68211e-19	yes
PARG27291	2387.14	1.1204	0.158906	88.4666	6.16188e-20	7.68211e-19	yes
PARG13529	17411	-1.72183	0.241228	88.423	6.29788e-20	7.84203e-19	yes
PARG17532	79.9556	5.19257	0.81704	88.3825	6.42664e-20	7.99668e-19	yes
PARG05825	605.038	1.34845	0.257127	88.3449	6.5487e-20	8.1428e-19	yes
PARG24276	572.552	1.09033	0.222614	88.2571	6.84257e-20	8.5022e-19	yes
PARG01448	361.811	-2.57639	0.284827	88.1038	7.3875e-20	9.17282e-19	yes
PARG01763	173.179	2.85949	0.530711	88.0536	7.57527e-20	9.39932e-19	yes
PARG04595	142.183	-0.914635	0.417203	88.0295	7.66722e-20	9.5067e-19	yes
PARG07121	673.493	0.789888	0.221637	88.0037	7.76674e-20	9.62332e-19	yes
PARG24702	331.872	0.615512	0.253117	87.9894	7.82257e-20	9.68566e-19	yes
PARG18491	3334.8	-0.961026	0.192007	87.9686	7.9043e-20	9.77998e-19	yes
PARG20460	416.087	-2.10823	0.239759	87.9522	7.96953e-20	9.85374e-19	yes
PARG07565	939.945	-1.13778	0.185072	87.9154	8.1173e-20	1.00294e-18	yes
PARG07189	3724.6	0.117274	0.172572	87.8049	8.57826e-20	1.05915e-18	yes
PARG08951	72.1423	3.77239	0.630368	87.799	8.60381e-20	1.06156e-18	yes
PARG06177	625.913	-0.433418	0.203539	87.6716	9.16957e-20	1.13057e-18	yes
PARG28057	1184.42	0.9591	0.218711	87.6335	9.34616e-20	1.15154e-18	yes
PARG06231	1305.43	-0.0355194	0.175699	87.6028	9.49053e-20	1.16851e-18	yes
PARG14126	3310.35	0.23081	0.161731	87.2984	1.10511e-19	1.35969e-18	yes
PARG18456	1969.17	0.707727	0.164304	87.2899	1.10977e-19	1.36448e-18	yes
PARG23827	1973.85	-0.302006	0.164474	87.2392	1.13826e-19	1.39853e-18	yes
PARG05800	3916.01	1.29089	0.207865	87.2259	1.14588e-19	1.4069e-18	yes
PARG27766	1011.15	-2.49824	0.293684	87.1875	1.16808e-19	1.43316e-18	yes
PARG24654	1692.86	1.08323	0.162446	87.1785	1.17334e-19	1.43861e-18	yes
PARG04197	444.241	3.29336	0.337877	87.0363	1.25979e-19	1.54353e-18	yes
PARG16536	313.556	-1.99269	0.272191	87.002	1.28164e-19	1.5692e-18	yes
PARG10682	1811.87	-0.103566	0.155125	86.927	1.33056e-19	1.62796e-18	yes
PARG00214	331.013	0.327527	0.316161	86.855	1.37939e-19	1.68653e-18	yes
PARG03712	476.103	0.31269	0.238203	86.8118	1.4095e-19	1.72216e-18	yes
PARG00282	1216.32	-0.276511	0.197245	86.7096	1.48339e-19	1.81118e-18	yes
PARG12751	1026.47	1.3119	0.203034	86.7076	1.48484e-19	1.81169e-18	yes
PARG15462	595.886	0.678421	0.21461	86.6984	1.49169e-19	1.81878e-18	yes
PARG24447	263.264	-2.53661	0.282371	86.645	1.53203e-19	1.86668e-18	yes
PARG14647	3898.89	0.283555	0.166773	86.6366	1.53854e-19	1.87331e-18	yes
PARG13490	848.036	0.569641	0.287286	86.595	1.57086e-19	1.91134e-18	yes
PARG12665	2413.21	0.368775	0.236916	86.5826	1.58063e-19	1.9219e-18	yes
PARG16942	1347.11	-1.53462	0.21134	86.5525	1.60459e-19	1.94968e-18	yes
PARG18065	4030.78	0.586302	0.154693	86.5309	1.62198e-19	1.96945e-18	yes
PARG19367	3841.67	0.250266	0.139649	86.4103	1.72286e-19	2.08921e-18	yes
PARG29151	626.509	0.807902	0.211044	86.4101	1.72298e-19	2.08921e-18	yes
PARG06678	440.892	2.45641	0.344548	86.4049	1.72749e-19	2.09322e-18	yes
PARG07203	43.1369	9.18823	2.16248	86.4016	1.73037e-19	2.09528e-18	yes
PARG08444	693.069	0.781284	0.198412	86.2465	1.8699e-19	2.26266e-18	yes
PARG13359	329.19	1.04772	0.261668	86.2187	1.89602e-19	2.2927e-18	yes
PARG11140	63.8689	-1.28887	0.850882	86.1793	1.93376e-19	2.33673e-18	yes
PARG05190	1394.82	-0.366762	0.167365	86.15	1.9623e-19	2.36959e-18	yes
PARG02812	188.144	1.39156	0.359294	86.1231	1.98882e-19	2.39997e-18	yes
PARG27177	298.599	-1.94181	0.279034	86.0394	2.07391e-19	2.50093e-18	yes
PARG20475	264.888	1.04972	0.317807	86.0345	2.07899e-19	2.50533e-18	yes
PARG28046	93.4426	2.61482	0.50534	85.9928	2.12272e-19	2.55628e-18	yes
PARG13685	2726.66	-1.76978	0.506468	85.5992	2.5844e-19	3.11013e-18	yes
PARG12153	769.834	-0.460123	0.195825	85.5775	2.61262e-19	3.14193e-18	yes
PARG12267	656.093	-0.572486	0.219228	85.5755	2.6153e-19	3.14301e-18	yes
PARG17734	4035.16	-0.195302	0.155602	85.5576	2.63884e-19	3.16913e-18	yes
PARG22879	1218.64	1.04176	0.173768	85.5443	2.65637e-19	3.18801e-18	yes
PARG00249	310.66	-0.0522085	0.265327	85.5399	2.66222e-19	3.19285e-18	yes
PARG10605	608.812	-0.514588	0.224139	85.4882	2.73198e-19	3.27427e-18	yes
PARG03436	153.765	0.752538	0.376864	85.4717	2.75461e-19	3.29915e-18	yes
PARG19648	797.388	-1.13295	0.194162	85.4479	2.78762e-19	3.33641e-18	yes
PARG03385	1526.63	-1.38746	0.177793	85.4424	2.7952e-19	3.34321e-18	yes
PARG24615	717.472	0.846108	0.212167	85.3956	2.86147e-19	3.42015e-18	yes
PARG27042	538.784	-2.3812	0.267365	85.2658	3.05322e-19	3.64686e-18	yes
PARG26857	2270.32	-0.911961	0.151276	85.0726	3.36291e-19	4.01404e-18	yes
PARG03676	1734.04	-0.591961	0.186812	84.9228	3.62445e-19	4.32327e-18	yes
PARG15452	334.335	0.873204	0.404459	84.8841	3.69527e-19	4.40476e-18	yes
PARG25755	107.047	1.49854	0.423371	84.8772	3.70807e-19	4.41703e-18	yes
PARG14987	9574.97	-0.137171	0.157758	84.7944	3.8648e-19	4.6006e-18	yes
PARG06233	57.1429	9.54162	2.13161	84.7513	3.94908e-19	4.69775e-18	yes
PARG07700	1403.65	0.594216	0.1906	84.7091	4.03325e-19	4.79463e-18	yes
PARG14943	383.576	1.85281	0.250809	84.6804	4.09147e-19	4.86056e-18	yes
PARG29723	82.6887	0.31247	0.620803	84.5292	4.4128e-19	5.23875e-18	yes
PARG05905	199.969	0.726987	0.321203	84.4929	4.49367e-19	5.33116e-18	yes
PARG16435	3978.48	-0.537299	0.147279	84.461	4.56598e-19	5.41328e-18	yes
PARG06366	43.1052	9.17954	2.15352	84.4262	4.64608e-19	5.50454e-18	yes
PARG19033	1363.17	-1.48207	0.168758	84.4095	4.68496e-19	5.54686e-18	yes
PARG04754	2309.88	-0.463614	0.190536	84.3709	4.77626e-19	5.65116e-18	yes
PARG08579	106.698	0.747988	0.424655	84.354	4.81676e-19	5.69524e-18	yes
PARG04098	312.758	-2.03566	0.272478	84.3326	4.86867e-19	5.75276e-18	yes
PARG24234	9588.89	1.44317	0.152266	84.3008	4.94667e-19	5.84099e-18	yes
PARG26592	960.796	0.152087	0.200748	84.2429	5.09206e-19	6.00863e-18	yes
PARG13313	1322.9	1.50826	0.286972	83.9141	6.00179e-19	7.07736e-18	yes
PARG12091	69.9484	3.84044	0.641171	83.9073	6.02237e-19	7.09687e-18	yes
PARG15924	1842.45	1.64291	0.178114	83.8823	6.09796e-19	7.18114e-18	yes
PARG10069	1762.47	-1.481	0.167679	83.8693	6.13779e-19	7.2232e-18	yes
PARG03682	12165.5	1.03307	0.147999	83.8487	6.20131e-19	7.29307e-18	yes
PARG27259	2119.45	-1.22334	0.222401	83.8424	6.22083e-19	7.31114e-18	yes
PARG06409	2891.24	-1.32899	0.17604	83.7691	6.45329e-19	7.57928e-18	yes
PARG02717	381.151	-2.28781	0.270536	83.6557	6.82964e-19	8.01594e-18	yes
PARG09270	454.914	1.72332	0.234372	83.645	6.86631e-19	8.0536e-18	yes
PARG06056	234.969	0.769708	0.302371	83.6151	6.96969e-19	8.1694e-18	yes
PARG10516	778.832	1.05743	0.222033	83.5734	7.11667e-19	8.33613e-18	yes
PARG13419	1486.59	-0.651563	0.164179	83.5245	7.29256e-19	8.53647e-18	yes
PARG23736	498.425	-1.68719	0.362459	83.5202	7.30827e-19	8.54917e-18	yes
PARG25501	391.062	1.61627	0.262331	83.5066	7.35803e-19	8.60166e-18	yes
PARG07606	1560.33	-0.315077	0.185933	83.4933	7.40745e-19	8.65368e-18	yes
PARG12349	127.012	-1.17086	0.567854	83.4786	7.46202e-19	8.71164e-18	yes
PARG19350	140.604	4.0447	0.548378	83.4487	7.57418e-19	8.83671e-18	yes
PARG10952	2806.22	1.9075	0.19656	83.4197	7.68485e-19	8.95988e-18	yes
PARG14527	9382.08	3.72234	0.602462	83.3944	7.78285e-19	9.06812e-18	yes
PARG05099	317.921	1.2357	0.269448	83.3779	7.84713e-19	9.13697e-18	yes
PARG03852	1372.75	1.42516	0.170198	83.3621	7.90948e-19	9.20348e-18	yes
PARG28714	142.209	2.17588	0.422582	83.3565	7.93179e-19	9.22333e-18	yes
PARG19596	500.699	-0.472085	0.368792	83.3523	7.94842e-19	9.23655e-18	yes
PARG01980	856.649	1.2399	0.195188	83.2399	8.40787e-19	9.76401e-18	yes
PARG03528	1513.56	-0.234032	0.17984	83.1695	8.70905e-19	1.01071e-17	yes
PARG19062	1102.1	-0.121955	0.182223	83.0525	9.23397e-19	1.07092e-17	yes
PARG24891	1197.99	0.607108	0.208131	83.0252	9.36054e-19	1.08488e-17	yes
PARG07328	1317.71	-1.4404	0.178606	83.0195	9.38734e-19	1.08727e-17	yes
PARG19678	369.077	0.347321	0.2631	82.9713	9.61615e-19	1.11304e-17	yes
PARG24752	347.885	0.310864	0.258487	82.8502	1.02164e-18	1.18174e-17	yes
PARG27074	935.297	1.90278	0.196533	82.8462	1.02369e-18	1.18333e-17	yes
PARG19177	1719.78	0.5225	0.168083	82.7933	1.05117e-18	1.2143e-17	yes
PARG18243	394.637	-1.44003	0.234291	82.7321	1.08381e-18	1.25119e-17	yes
PARG05751	1603.45	-0.42006	0.175571	82.6881	1.10789e-18	1.27815e-17	yes
PARG05724	530.611	0.419391	0.226159	82.678	1.11355e-18	1.28383e-17	yes
PARG00027	821.409	1.44164	0.215479	82.6707	1.11759e-18	1.28764e-17	yes
PARG23999	641.943	-1.79186	0.335558	82.6362	1.13702e-18	1.30918e-17	yes
PARG24450	779.792	1.00453	0.196631	82.5707	1.17488e-18	1.35188e-17	yes
PARG08577	2314.87	-0.704641	0.182266	82.5602	1.18108e-18	1.35812e-17	yes
PARG00143	160.527	1.59525	0.363223	82.369	1.29956e-18	1.49339e-17	yes
PARG23793	620.233	0.229005	0.203037	82.3551	1.30864e-18	1.50284e-17	yes
PARG08251	317.839	0.429936	0.286746	82.2936	1.34946e-18	1.54871e-17	yes
PARG12520	1064.08	0.282466	0.262504	82.2364	1.38864e-18	1.59264e-17	yes
PARG08813	2200.13	1.16153	0.157938	82.1425	1.45539e-18	1.6681e-17	yes
PARG06284	951.209	1.09722	0.196681	82.1164	1.4745e-18	1.68785e-17	yes
PARG15934	1525.07	0.79057	0.176916	82.1164	1.47454e-18	1.68785e-17	yes
PARG20780	277.379	-1.63051	0.274943	82.0967	1.48914e-18	1.70345e-17	yes
PARG18791	472.963	-0.608908	0.300223	82.0937	1.49135e-18	1.70376e-17	yes
PARG22865	580.002	-1.92681	0.226342	82.0949	1.49043e-18	1.70376e-17	yes
PARG28552	42.1072	9.13401	2.1555	82.0778	1.50326e-18	1.71626e-17	yes
PARG12346	1832.89	-0.335362	0.161794	82.0493	1.52482e-18	1.73974e-17	yes
PARG14065	410.478	-2.02025	0.242782	82.0043	1.55951e-18	1.77817e-17	yes
PARG15774	165.41	0.0201838	0.343494	81.9682	1.58796e-18	1.80943e-17	yes
PARG08690_DAM5	1863.26	-6.31721	0.67298	81.8532	1.6819e-18	1.91523e-17	yes
PARG25077	7235.51	0.297396	0.156784	81.8451	1.68874e-18	1.92178e-17	yes
PARG09186	775.422	0.0125281	0.223861	81.8039	1.72388e-18	1.96049e-17	yes
PARG10470	6976.82	0.211855	0.14036	81.7836	1.74148e-18	1.97923e-17	yes
PARG21564	1643.88	-0.104266	0.175341	81.7549	1.76666e-18	2.00656e-17	yes
PARG20502	274.343	1.24696	0.28577	81.7529	1.76845e-18	2.00729e-17	yes
PARG01963	339.017	-1.6581	0.284108	81.7493	1.77164e-18	2.00961e-17	yes
PARG02090	668.418	1.03396	0.216958	81.7365	1.78297e-18	2.02116e-17	yes
PARG13808	4137.56	1.62255	0.176913	81.7292	1.78952e-18	2.02727e-17	yes
PARG11981	133.61	1.4696	0.393646	81.6591	1.85336e-18	2.09824e-17	yes
PARG19880	206.676	1.75277	0.334656	81.6318	1.87877e-18	2.12565e-17	yes
PARG17968	415.67	-0.57896	0.353665	81.6257	1.88451e-18	2.13077e-17	yes
PARG19411	587.94	-1.89625	0.228746	81.5095	1.99729e-18	2.25683e-17	yes
PARG11529	92.2544	2.7129	0.549854	81.4659	2.04127e-18	2.30505e-17	yes
PARG15385	14491.6	-0.277292	0.167135	81.4461	2.0616e-18	2.32651e-17	yes
PARG16567	50.959	6.90879	1.5501	81.3721	2.13929e-18	2.41263e-17	yes
PARG22908	1793.38	-0.742453	0.1574	81.361	2.15119e-18	2.42451e-17	yes
PARG01932	71.2202	-6.3128	1.02357	81.3427	2.17095e-18	2.4452e-17	yes
PARG21584	1544.83	1.37162	0.204684	81.2529	2.27063e-18	2.55584e-17	yes
PARG12047	7074.9	-0.786136	0.140614	81.2476	2.27669e-18	2.56103e-17	yes
PARG07004	744.392	0.417398	0.192213	81.2057	2.32494e-18	2.61363e-17	yes
PARG07503	300.923	1.27312	0.270016	81.186	2.34797e-18	2.63783e-17	yes
PARG15527	198.099	-2.94204	0.353596	81.162	2.37625e-18	2.6679e-17	yes
PARG28095	1470.64	-0.648286	0.17523	81.1525	2.38763e-18	2.67896e-17	yes
PARG17690	1027.31	-1.15051	0.189757	81.1506	2.38989e-18	2.67979e-17	yes
PARG03740	762.188	-0.183082	0.234821	81.1381	2.40489e-18	2.69489e-17	yes
PARG03234	660.234	-1.86926	0.221341	80.9182	2.68437e-18	3.00615e-17	yes
PARG07199	319.335	0.850731	0.258977	80.9083	2.69759e-18	3.01904e-17	yes
PARG22697	250.184	0.0425478	0.362984	80.8167	2.82406e-18	3.15857e-17	yes
PARG15870	2986.42	-0.933069	0.150564	80.7887	2.86389e-18	3.20107e-17	yes
PARG16111	3263.34	0.615688	0.149229	80.7874	2.8658e-18	3.20118e-17	yes
PARG02413	1914.82	-0.653021	0.156533	80.773	2.88641e-18	3.22174e-17	yes
PARG07523	693.981	1.44644	0.265007	80.772	2.88787e-18	3.22174e-17	yes
PARG00489	213.636	0.359921	0.423268	80.7706	2.88989e-18	3.22195e-17	yes
PARG28290	286.935	-0.683601	0.298067	80.7559	2.91132e-18	3.24377e-17	yes
PARG08088	103.152	2.55385	0.473959	80.7319	2.94636e-18	3.28074e-17	yes
PARG10355	682.429	0.148081	0.217075	80.7085	2.98102e-18	3.31723e-17	yes
PARG27166	687.291	-2.2034	0.277823	80.5912	3.16113e-18	3.51544e-17	yes
PARG07354	3942.96	-0.311408	0.234653	80.5888	3.16491e-18	3.51741e-17	yes
PARG05258	486.241	1.26084	0.239509	80.5858	3.16974e-18	3.52055e-17	yes
PARG20152	435.59	0.968921	0.237588	80.4795	3.34267e-18	3.71028e-17	yes
PARG22596	2205.31	0.0341206	0.174586	80.4589	3.37728e-18	3.74633e-17	yes
PARG07542	520.611	-2.32106	0.268235	80.4251	3.43488e-18	3.80782e-17	yes
PARG18139	218.509	2.20267	0.36255	80.3926	3.49118e-18	3.8678e-17	yes
PARG27500	706.986	-0.443279	0.210105	80.3837	3.50676e-18	3.88261e-17	yes
PARG19660	186.554	1.9059	0.371774	80.3823	3.50924e-18	3.88291e-17	yes
PARG24348	190.526	2.63982	0.36312	80.3598	3.54888e-18	3.92431e-17	yes
PARG24382	692.593	-0.831337	0.29641	80.3142	3.63077e-18	4.01233e-17	yes
PARG16321	1175.82	1.26625	0.185039	80.1529	3.93558e-18	4.34644e-17	yes
PARG03516	2345.86	0.651702	0.158825	80.093	4.05541e-18	4.47598e-17	yes
PARG22870	364.598	0.229454	0.243654	80.0915	4.05834e-18	4.47639e-17	yes
PARG22471	4082.83	-1.30323	0.164981	80.0798	4.08224e-18	4.49993e-17	yes
PARG03232	1926.05	0.133939	0.161401	80.0558	4.1315e-18	4.55138e-17	yes
PARG13883	631.589	-0.288717	0.201672	80.0401	4.16402e-18	4.58433e-17	yes
PARG07094	1026.71	0.0330573	0.199514	80.029	4.18712e-18	4.60688e-17	yes
PARG12810	3121.45	0.165975	0.149424	79.9916	4.26618e-18	4.69093e-17	yes
PARG29180	1547.92	0.0788044	0.175423	79.9543	4.34655e-18	4.77632e-17	yes
PARG05666	1911.2	-0.306867	0.175931	79.8603	4.55564e-18	5.00295e-17	yes
PARG27612	238.933	-0.0663674	0.314803	79.7941	4.70913e-18	5.16829e-17	yes
PARG07151	443.482	1.9387	0.360576	79.731	4.86001e-18	5.33055e-17	yes
PARG13590	958.677	0.857972	0.206642	79.6729	5.00326e-18	5.48424e-17	yes
PARG17686	5901.39	-0.66262	0.15654	79.6334	5.10313e-18	5.59023e-17	yes
PARG07644	898.039	-0.586216	0.20564	79.6255	5.12321e-18	5.60874e-17	yes
PARG13199	372.436	1.54758	0.262371	79.5723	5.26127e-18	5.75629e-17	yes
PARG10390	163.767	0.317675	0.365822	79.5675	5.27397e-18	5.7666e-17	yes
PARG29199	523.584	-0.0843803	0.227133	79.5448	5.33429e-18	5.82893e-17	yes
PARG20453	512.272	0.32641	0.24901	79.4628	5.5574e-18	6.06896e-17	yes
PARG05558	6439.03	-1.74163	0.262673	79.3952	5.74842e-18	6.27366e-17	yes
PARG22815	365.324	-0.229615	0.261808	79.3734	5.81148e-18	6.33855e-17	yes
PARG26960	89.0401	-4.99161	0.724072	79.2748	6.1052e-18	6.65478e-17	yes
PARG19205	2316.76	-1.31532	0.154673	79.2427	6.20383e-18	6.7581e-17	yes
PARG24252	3943.99	-0.540968	0.150185	79.2385	6.21684e-18	6.76808e-17	yes
PARG13903	707.104	-1.51832	0.279717	79.213	6.29672e-18	6.8508e-17	yes
PARG22803	317.339	1.5646	0.271862	79.2011	6.3342e-18	6.88732e-17	yes
PARG00964	40.8739	5.6326	1.19605	79.1844	6.38741e-18	6.94088e-17	yes
PARG11658	316.318	-0.0337869	0.256705	79.1585	6.47081e-18	7.02716e-17	yes
PARG17120	86.7797	1.11051	0.47716	79.1432	6.5205e-18	7.07675e-17	yes
PARG07919	373.772	1.38856	0.279205	79.1344	6.54905e-18	7.10335e-17	yes
PARG25102	43.0496	4.37507	0.898052	79.1083	6.63526e-18	7.19243e-17	yes
PARG26833	286.946	1.79039	0.283103	79.033	6.88964e-18	7.46356e-17	yes
PARG00221	61.1738	4.32487	0.747963	79.0082	6.97564e-18	7.55208e-17	yes
PARG20937	483.282	0.946783	0.227675	78.9842	7.06005e-18	7.63875e-17	yes
PARG23558	9284.88	-0.0931525	0.167409	78.946	7.19609e-18	7.78116e-17	yes
PARG18978	598.22	0.237198	0.215943	78.7917	7.77307e-18	8.39988e-17	yes
PARG07447	512.883	1.39254	0.242634	78.7736	7.84384e-18	8.47115e-17	yes
PARG01088	227.891	1.36484	0.301709	78.7028	8.12642e-18	8.77095e-17	yes
PARG27771	93.406	3.01384	0.529625	78.656	8.31899e-18	8.97328e-17	yes
PARG29978	51750.3	0.903156	0.124589	78.6412	8.38084e-18	9.03445e-17
PARG02086	710.719	-0.58116	0.193729	78.6377	8.39539e-18	9.04459e-17	yes
PARG06197	98.4477	-0.747987	0.659277	78.5848	8.62035e-18	9.28126e-17	yes
PARG16494	421.569	0.804099	0.239387	78.5327	8.84788e-18	9.52041e-17	yes
PARG28152	268.307	0.90782	0.299453	78.4921	9.02949e-18	9.70988e-17	yes
PARG23225	1131.85	-0.00751626	0.177513	78.4665	9.1455e-18	9.82862e-17	yes
PARG14496	635.083	-0.555538	0.212368	78.3818	9.54154e-18	1.0248e-16	yes
PARG22911	268.308	0.979868	0.314916	78.3772	9.56349e-18	1.02653e-16	yes
PARG06834	1377.08	0.843674	0.174963	78.3559	9.66586e-18	1.03688e-16	yes
PARG17756	822.387	1.14752	0.223763	78.3443	9.72211e-18	1.04228e-16	yes
PARG02891	649.595	0.671239	0.200269	78.3048	9.91586e-18	1.06241e-16	yes
PARG02324	292.948	-0.537301	0.283812	78.2882	9.99857e-18	1.07061e-16	yes
PARG07885	630.697	1.42484	0.242058	78.2815	1.00321e-17	1.07355e-16	yes
PARG26071	1717.89	-0.492311	0.165286	78.2434	1.02248e-17	1.0935e-16	yes
PARG03151	455.013	1.60172	0.239135	78.2074	1.04108e-17	1.11272e-16	yes
PARG27439	924.928	1.68409	0.187731	78.1451	1.07398e-17	1.14719e-16	yes
PARG22393	643.27	1.63002	0.210686	78.1124	1.09172e-17	1.16542e-16	yes
PARG12517	373.654	0.178701	0.257192	78.0131	1.14728e-17	1.224e-16	yes
PARG20043	517.073	1.01219	0.217874	78.0047	1.15208e-17	1.22838e-16	yes
PARG01841	221.542	-0.57698	0.331753	77.9706	1.17191e-17	1.24875e-16	yes
PARG19707	392.293	-2.73483	0.327131	77.9678	1.17356e-17	1.24976e-16	yes
PARG12985	279.407	-2.04679	0.290757	77.8715	1.23148e-17	1.31065e-16	yes
PARG12151	158.76	1.86307	0.363993	77.7455	1.31154e-17	1.39501e-16	yes
PARG24551	133.335	2.12238	0.395075	77.6876	1.35002e-17	1.43507e-16	yes
PARG25669	533.919	0.306039	0.213536	77.5255	1.46406e-17	1.55535e-16	yes
PARG26289	1121.6	-0.888667	0.174908	77.5099	1.47549e-17	1.56655e-16	yes
PARG23921	188.932	-1.8515	0.323535	77.4989	1.48366e-17	1.57427e-16	yes
PARG05518	599.365	6.82263	0.99482	77.4288	1.53658e-17	1.62944e-16	yes
PARG19712	1895.5	0.162474	0.198418	77.403	1.55651e-17	1.64958e-16	yes
PARG01214	457.807	-1.95944	0.230504	77.384	1.57133e-17	1.66428e-16	yes
PARG19387	1561.88	0.890963	0.181104	77.2888	1.64798e-17	1.74442e-16	yes
PARG12236	1321.34	1.97718	0.305544	77.072	1.83661e-17	1.94246e-16	yes
PARG24099	13181.6	1.2527	0.144485	77.0713	1.83728e-17	1.94246e-16	yes
PARG27646	306.203	1.65367	0.34702	77.0661	1.84209e-17	1.94637e-16	yes
PARG07168	1403.5	0.585777	0.166414	77.0069	1.89744e-17	2.00365e-16	yes
PARG10081	643.258	0.607286	0.210663	76.9777	1.92532e-17	2.03187e-16	yes
PARG11695	44.7415	6.76891	1.58568	76.9256	1.97617e-17	2.08429e-16	yes
PARG12953	402.906	-2.15351	0.259978	76.9107	1.99097e-17	2.09863e-16	yes
PARG29449	4058.66	-0.0871074	0.157406	76.8841	2.01761e-17	2.12544e-16	yes
PARG14420	2194.3	0.576832	0.157747	76.854	2.04818e-17	2.15635e-16	yes
PARG09191	3815.5	1.5611	0.259031	76.8091	2.0947e-17	2.20402e-16	yes
PARG29162	115.271	0.472202	0.42036	76.798	2.1063e-17	2.21489e-16	yes
PARG29463	3884.86	0.439542	0.167162	76.7937	2.11087e-17	2.21837e-16	yes
PARG18986	138.615	-3.34829	0.396485	76.7782	2.12729e-17	2.23429e-16	yes
PARG09676	992.137	0.519584	0.210706	76.773	2.13283e-17	2.23877e-16	yes
PARG02693	1496.75	-0.336466	0.164619	76.7603	2.14641e-17	2.25168e-16	yes
PARG26916	45.4575	-3.22932	1.68386	76.7238	2.18598e-17	2.29182e-16	yes
PARG18985	340.462	2.01244	0.281907	76.7092	2.20201e-17	2.30726e-16	yes
PARG07800	1154.32	0.286629	0.196455	76.696	2.21657e-17	2.32112e-16	yes
PARG24943	919.953	-1.64373	0.294313	76.6806	2.23365e-17	2.33762e-16	yes
PARG15175	1012.33	-0.788008	0.18326	76.582	2.34654e-17	2.45431e-16	yes
PARG27485	207.282	-0.950917	0.340661	76.5661	2.36524e-17	2.47239e-16	yes
PARG10957	182.078	-0.682624	0.39982	76.5209	2.4194e-17	2.5275e-16	yes
PARG13064	661.807	0.579315	0.226521	76.4812	2.4679e-17	2.57664e-16	yes
PARG13065	5851.04	0.862765	0.142611	76.4688	2.4832e-17	2.59107e-16
PARG27823	175.955	2.30848	0.401667	76.3765	2.60044e-17	2.7118e-16	yes
PARG23956	3112.79	0.935835	0.147358	76.3584	2.62409e-17	2.73484e-16	yes
PARG27689	1598.53	-0.52513	0.175015	76.355	2.62859e-17	2.73791e-16	yes
PARG08752	2856.89	1.21578	0.152628	76.2429	2.78018e-17	2.89409e-16	yes
PARG16203	401.262	-0.637625	0.372317	76.2171	2.81617e-17	2.92982e-16	yes
PARG20251	82.4962	-0.60498	0.588171	76.1975	2.84393e-17	2.95695e-16	yes
PARG26881	783.067	-0.752802	0.251308	76.1758	2.87499e-17	2.98748e-16	yes
PARG06087	578.758	0.263003	0.319744	76.1157	2.96273e-17	3.07683e-16	yes
PARG26751	690.557	1.03668	0.212846	76.0737	3.02562e-17	3.14029e-16	yes
PARG20485	460.21	2.18048	0.247767	76.0479	3.06484e-17	3.17912e-16	yes
PARG22562	1898.89	-0.483486	0.169955	76.0269	3.09713e-17	3.21072e-16	yes
PARG23717	1499.97	0.806246	0.161998	76.0189	3.10962e-17	3.22176e-16	yes
PARG20097	1062.76	-1.64819	0.233408	75.9982	3.14197e-17	3.25336e-16	yes
PARG00559	35.4205	8.88542	2.1564	75.9843	3.1639e-17	3.27415e-16	yes
PARG27635	249.071	-0.226421	0.298236	75.9209	3.2658e-17	3.3776e-16	yes
PARG13052	1711.95	-0.102152	0.160921	75.8996	3.30077e-17	3.41177e-16	yes
PARG05634	452.83	-2.06257	0.247037	75.8548	3.37545e-17	3.48691e-16	yes
PARG00044	350.257	-2.53226	0.332072	75.8042	3.46195e-17	3.57416e-16	yes
PARG07853	627.725	2.10545	0.272667	75.7967	3.47494e-17	3.58547e-16	yes
PARG08595	1896.68	-1.29623	0.157038	75.7866	3.49256e-17	3.60154e-16	yes
PARG19384	334.334	1.21562	0.302639	75.698	3.65085e-17	3.76256e-16	yes
PARG05147	3067.88	1.55819	0.168469	75.6379	3.76223e-17	3.87507e-16	yes
PARG03626	35.1899	8.87606	2.15675	75.6217	3.79274e-17	3.90421e-16	yes
PARG18026	4378.37	-0.131801	0.171327	75.6131	3.80906e-17	3.91871e-16	yes
PARG04414	1390.45	-0.854977	0.180351	75.587	3.85917e-17	3.96795e-16	yes
PARG02834	366.433	-2.33391	0.336401	75.5714	3.88942e-17	3.99672e-16	yes
PARG21126	120.309	0.669221	0.477549	75.5648	3.90226e-17	4.00756e-16	yes
PARG10312	1396.76	1.30295	0.187204	75.5538	3.92378e-17	4.02732e-16	yes
PARG24167	721.155	1.26844	0.196848	75.5495	3.93222e-17	4.03362e-16	yes
PARG25333	5917.37	0.294776	0.139409	75.4493	4.1343e-17	4.23844e-16	yes
PARG25200	1098.06	0.183336	0.213378	75.4091	4.21822e-17	4.32195e-16	yes
PARG01221	268.67	-1.83977	0.291216	75.3655	4.31108e-17	4.41453e-16	yes
PARG28741	2379.32	0.285332	0.17805	75.3035	4.44678e-17	4.55083e-16	yes
PARG02229	516.847	0.660524	0.345903	75.2984	4.45831e-17	4.55997e-16	yes
PARG28239	6430.45	-1.2904	0.157042	75.2597	4.54525e-17	4.6462e-16	yes
PARG26914	1480.81	-1.22603	0.163578	75.2484	4.57107e-17	4.66987e-16	yes
PARG26181	774.509	1.37357	0.198724	75.2372	4.59683e-17	4.69347e-16	yes
PARG08429	359.275	2.12916	0.330538	75.1422	4.82045e-17	4.91892e-16	yes
PARG29379	843.896	-0.167954	0.207684	75.114	4.8887e-17	4.98568e-16	yes
PARG12975	478.145	0.803141	0.229044	75.1078	4.90403e-17	4.99842e-16	yes
PARG02102	736.304	-0.38595	0.281331	75.0486	5.05134e-17	5.14558e-16	yes
PARG18487	1910.89	0.507261	0.167509	74.9256	5.37161e-17	5.46865e-16	yes
PARG10247	2110.86	-0.470806	0.174554	74.9146	5.40144e-17	5.49584e-16	yes
PARG07615	112.559	1.97866	0.451758	74.9078	5.41973e-17	5.51102e-16	yes
PARG26884	3066.07	0.745698	0.174863	74.9067	5.42262e-17	5.51102e-16	yes
PARG26794	1068.02	-0.2011	0.197393	74.8855	5.48048e-17	5.5666e-16	yes
PARG11692	1292.57	1.20741	0.175931	74.8736	5.51331e-17	5.59671e-16	yes
PARG18442	172.604	0.731443	0.339177	74.8478	5.58475e-17	5.66596e-16	yes
PARG00986	631.723	-0.473956	0.24925	74.8416	5.60212e-17	5.67866e-16	yes
PARG21263	334.663	1.39805	0.283456	74.841	5.60373e-17	5.67866e-16	yes
PARG27531	726.595	1.59035	0.221774	74.8246	5.6499e-17	5.72215e-16	yes
PARG07647	699.644	-1.73923	0.212207	74.8014	5.71579e-17	5.78555e-16	yes
PARG24420	811.754	0.447588	0.187384	74.7451	5.87905e-17	5.94738e-16	yes
PARG01926	85.3244	-4.93216	0.763312	74.7424	5.88695e-17	5.95194e-16	yes
PARG02671	3504.24	-0.487511	0.144931	74.7332	5.914e-17	5.97586e-16	yes
PARG29197	947.916	-0.678569	0.214685	74.6386	6.20064e-17	6.2619e-16	yes
PARG19099	396.873	-0.217643	0.261074	74.6371	6.20534e-17	6.26305e-16	yes
PARG03665	7040.24	-2.47055	0.618059	74.6224	6.25096e-17	6.30547e-16	yes
PARG23478	712.475	0.59488	0.194958	74.5206	6.57738e-17	6.63093e-16	yes
PARG23576	1014.88	-2.06659	0.251406	74.4376	6.85614e-17	6.90801e-16	yes
PARG24209	1248.2	0.866194	0.170896	74.4249	6.89966e-17	6.94787e-16	yes
PARG28410	565.147	-0.99116	0.258485	74.4176	6.92512e-17	6.96951e-16	yes
PARG12783	411.39	0.78779	0.274662	74.3869	7.03232e-17	7.07336e-16	yes
PARG27474	485.898	1.59216	0.2734	74.3798	7.05704e-17	7.09416e-16	yes
PARG25402	766.054	-1.58341	0.191671	74.3386	7.20392e-17	7.23767e-16	yes
PARG24361	739.32	1.26879	0.195694	74.3343	7.21961e-17	7.2493e-16	yes
PARG25084	88.4685	0.247905	0.590347	74.3236	7.25831e-17	7.28399e-16	yes
PARG07690	8239.81	-0.146313	0.200893	74.1809	7.79504e-17	7.81816e-16	yes
PARG13208	1673.32	0.183749	0.163351	74.1316	7.98947e-17	8.0086e-16	yes
PARG02366	2998.84	-1.00224	0.160833	74.1156	8.054e-17	8.06869e-16	yes
PARG24155	103.633	2.46042	0.470595	74.1084	8.08287e-17	8.093e-16	yes
PARG19675	5728.68	0.264984	0.136715	74.0751	8.21859e-17	8.22421e-16	yes
PARG27200	842.781	0.49252	0.185455	74.0312	8.40082e-17	8.40178e-16	yes
PARG06896	967.223	-0.0331388	0.182466	74.0195	8.45007e-17	8.44623e-16	yes
PARG21950	716.233	-0.163941	0.20942	74.0112	8.48527e-17	8.47659e-16	yes
PARG03967	854.881	-2.0196	0.261009	73.9332	8.82308e-17	8.80905e-16	yes
PARG15514	845.787	0.418382	0.206928	73.9238	8.86455e-17	8.84544e-16	yes
PARG26247	125.735	3.02304	0.484439	73.8005	9.42827e-17	9.4026e-16	yes
PARG24626	609.907	-1.57014	0.206048	73.7871	9.49154e-17	9.46033e-16	yes
PARG17960	528.375	-1.88304	0.227221	73.7542	9.64912e-17	9.61194e-16	yes
PARG11724	240.995	2.63174	0.36098	73.7253	9.78953e-17	9.74629e-16	yes
PARG11224	206.528	2.4006	0.362637	73.7151	9.83937e-17	9.79037e-16	yes
PARG03690	3393.33	-0.204052	0.142105	73.699	9.91898e-17	9.864e-16
PARG07208	395.684	1.32016	0.256494	73.67	1.00639e-16	1.00025e-15	yes
PARG11645	2584.68	0.653309	0.258588	73.6448	1.01913e-16	1.01234e-15	yes
PARG07304	830.905	-0.180896	0.186987	73.6043	1.04001e-16	1.03237e-15	yes
PARG09494	607.152	1.00659	0.216671	73.6034	1.04047e-16	1.03237e-15	yes
PARG20464	1087.06	1.79128	0.198023	73.5919	1.04648e-16	1.03775e-15	yes
PARG06315	1722.03	0.34352	0.200693	73.4947	1.09856e-16	1.08878e-15	yes
PARG30101	12020.4	-1.14663	0.152161	73.4768	1.10845e-16	1.09796e-15	yes
PARG18298	2033.36	-0.540628	0.155726	73.4665	1.11416e-16	1.10299e-15	yes
PARG09263	90.2723	3.23862	0.525422	73.4642	1.11545e-16	1.10365e-15	yes
PARG23577	1265.66	-0.116468	0.176762	73.4275	1.1361e-16	1.12345e-15	yes
PARG20945	256.54	3.89638	0.519949	73.3374	1.18846e-16	1.17457e-15	yes
PARG28273	4176.65	-0.498605	0.158775	73.293	1.21514e-16	1.20026e-15	yes
PARG03488	717.706	1.21319	0.2209	73.236	1.25029e-16	1.23428e-15	yes
PARG13638	141.125	0.28102	0.366149	73.1911	1.27868e-16	1.2616e-15	yes
PARG07143	396.686	0.589283	0.273864	73.1277	1.31986e-16	1.3015e-15	yes
PARG11728	84.3255	0.987557	0.816414	73.1247	1.32181e-16	1.30269e-15	yes
PARG24466	6354.21	-0.198928	0.145117	73.1222	1.32346e-16	1.30359e-15
PARG00544	725.794	-0.781213	0.222386	72.9905	1.41356e-16	1.39156e-15	yes
PARG20101	1054	0.129188	0.175805	72.9889	1.41467e-16	1.39187e-15	yes
PARG15718	684.596	0.29129	0.206652	72.968	1.42957e-16	1.40574e-15	yes
PARG04018	31.3782	8.7216	2.17095	72.885	1.49009e-16	1.46444e-15	yes
PARG11880	1223.74	0.3494	0.177577	72.8577	1.5106e-16	1.48377e-15	yes
PARG06590	202.031	0.46727	0.307604	72.8248	1.53565e-16	1.50752e-15	yes
PARG27196	435.237	-2.89485	0.370041	72.7243	1.6148e-16	1.58434e-15	yes
PARG01565	154.11	-1.0098	0.519174	72.6979	1.63625e-16	1.60449e-15	yes
PARG04015	2948.24	0.920061	0.158347	72.5968	1.72106e-16	1.68672e-15	yes
PARG21795	921.156	-0.645645	0.187832	72.5911	1.72605e-16	1.69066e-15	yes
PARG19751	940.045	-0.372935	0.191835	72.5808	1.73493e-16	1.69842e-15	yes
PARG21460	1288.36	-0.576535	0.172964	72.5392	1.77142e-16	1.73317e-15	yes
PARG20707	751.31	-0.41638	0.222163	72.5212	1.78737e-16	1.74781e-15	yes
PARG02944	77.2115	1.7918	0.501461	72.4768	1.82751e-16	1.78606e-15	yes
PARG08575	590	0.0403792	0.294365	72.4597	1.84317e-16	1.80037e-15	yes
PARG28555	2141.59	1.28317	0.158044	72.4431	1.85859e-16	1.81443e-15	yes
PARG12213	828.152	-1.35351	0.188133	72.4377	1.8636e-16	1.8183e-15	yes
PARG10269	4020.76	-1.1964	0.149089	72.3561	1.94121e-16	1.89298e-15	yes
PARG19554	164.804	1.59357	0.376659	72.3306	1.96613e-16	1.91621e-15	yes
PARG05552	105.255	0.41131	0.529589	72.3021	1.99436e-16	1.94265e-15	yes
PARG28300	1316.38	0.319807	0.188514	72.281	2.01544e-16	1.9621e-15	yes
PARG03727	799.877	0.0232303	0.214056	72.2481	2.04892e-16	1.99359e-15	yes
PARG12454	1481.93	1.22903	0.206228	72.1626	2.13839e-16	2.07949e-15	yes
PARG13389	60.1847	5.54735	1.01716	72.1309	2.17261e-16	2.1116e-15	yes
PARG11156	353.745	1.58478	0.284013	72.0884	2.21925e-16	2.15573e-15	yes
PARG15926	7027.04	-0.0421415	0.13765	72.0742	2.23507e-16	2.16991e-15
PARG09884	782.022	-0.573114	0.204862	72.0381	2.2757e-16	2.20813e-15	yes
PARG08503	1175.16	-1.14171	0.255635	72.0182	2.2985e-16	2.22902e-15	yes
PARG27147	369.485	-0.157018	0.251775	72.0014	2.31786e-16	2.24656e-15	yes
PARG04060	3246.97	0.915523	0.159895	71.9962	2.32395e-16	2.25123e-15	yes
PARG02953	487.491	1.53059	0.264665	71.9904	2.33074e-16	2.25656e-15	yes
PARG06288	97.5847	2.55	0.496966	71.9828	2.33957e-16	2.26385e-15	yes
PARG08988	1212.01	-1.26303	0.189568	71.9717	2.35255e-16	2.27517e-15	yes
PARG27665	1294.62	-1.64562	0.201208	71.9418	2.388e-16	2.30818e-15	yes
PARG00629	425.133	0.183567	0.258045	71.9383	2.3922e-16	2.31097e-15	yes
PARG12819	103.096	0.802338	0.428619	71.906	2.43113e-16	2.34729e-15	yes
PARG07131	751.613	-1.71322	0.211952	71.8842	2.45779e-16	2.37173e-15	yes
PARG11826	3165.77	0.197632	0.162945	71.8605	2.48707e-16	2.39867e-15	yes
PARG13908	355.863	0.636422	0.246336	71.8327	2.52187e-16	2.4309e-15	yes
PARG07502	2280.8	-0.246401	0.159713	71.808	2.5533e-16	2.45984e-15	yes
PARG12513	2849.48	0.885846	0.14718	71.7772	2.59283e-16	2.49519e-15
PARG17861	1412.41	-0.0856182	0.171012	71.7772	2.59281e-16	2.49519e-15	yes
PARG10684	9900.21	-1.2401	0.164243	71.7542	2.62279e-16	2.52264e-15	yes
PARG05667	44.868	5.14531	1.02549	71.6213	2.8031e-16	2.6946e-15	yes
PARG12195	47.7771	5.7943	1.16864	71.5311	2.93235e-16	2.8173e-15	yes
PARG04316	300.859	1.12276	0.287508	71.3861	3.15291e-16	3.02755e-15	yes
PARG06621	1306.48	-0.594366	0.180611	71.3768	3.16757e-16	3.03997e-15	yes
PARG29350	18868	-1.05531	0.141156	71.3451	3.21817e-16	3.08684e-15	yes
PARG23353	455.337	-0.822188	0.27033	71.3221	3.25539e-16	3.12085e-15	yes
PARG19162	1114.59	0.0314005	0.208952	71.2143	3.4357e-16	3.2919e-15	yes
PARG18064	10093.8	1.0001	0.131719	71.1877	3.48162e-16	3.33409e-15
PARG02167	7699.53	0.845281	0.139201	71.1821	3.49151e-16	3.34174e-15	yes
PARG28312	3241.97	-0.637171	0.15442	71.1787	3.49731e-16	3.34547e-15	yes
PARG21202	4878.87	-0.57664	0.152995	71.1527	3.54309e-16	3.38742e-15	yes
PARG22977	399.539	1.50263	0.250196	71.1115	3.61691e-16	3.45612e-15	yes
PARG22030	320.033	2.60937	0.393379	71.0818	3.67106e-16	3.50595e-15	yes
PARG11226	315.624	1.72532	0.269347	70.9045	4.01137e-16	3.82888e-15	yes
PARG06309	1467.36	-1.32169	0.215058	70.851	4.11994e-16	3.93037e-15	yes
PARG02677	223.931	3.25192	0.386092	70.8482	4.1259e-16	3.93393e-15	yes
PARG26306	204.559	0.27762	0.310631	70.8233	4.1775e-16	3.98096e-15	yes
PARG11660	162.627	0.533495	0.391004	70.8043	4.21744e-16	4.01685e-15	yes
PARG18553	982.072	0.408387	0.189111	70.7336	4.36906e-16	4.159e-15	yes
PARG06209	1449.03	-0.452104	0.18319	70.6785	4.49107e-16	4.27284e-15	yes
PARG07571	333.302	0.540896	0.267598	70.6475	4.56142e-16	4.33742e-15	yes
PARG24004	2193.62	-0.833063	0.188889	70.646	4.56478e-16	4.33827e-15	yes
PARG07085	4407.39	1.44336	0.191284	70.5726	4.73544e-16	4.49803e-15	yes
PARG03278	1446.9	1.26143	0.16899	70.567	4.74869e-16	4.50574e-15	yes
PARG17683	834.533	1.06895	0.20513	70.5679	4.74655e-16	4.50574e-15	yes
PARG23967	1206.97	-0.454788	0.168254	70.5582	4.76948e-16	4.52304e-15	yes
PARG00058	410.859	1.06023	0.253082	70.5275	4.84343e-16	4.59068e-15	yes
PARG20144	953.33	1.58885	0.202504	70.4452	5.04673e-16	4.78079e-15	yes
PARG29384	690.808	-1.08708	0.313014	70.4413	5.05659e-16	4.78756e-15	yes
PARG06659	1519.05	1.1768	0.170931	70.4071	5.14395e-16	4.86765e-15	yes
PARG07899	955.436	1.3202	0.227973	70.4055	5.14814e-16	4.86899e-15	yes
PARG26706	940.974	1.24273	0.194431	70.4026	5.15553e-16	4.87336e-15	yes
PARG16140	222.825	-0.172005	0.37135	70.3843	5.20289e-16	4.91548e-15	yes
PARG16985	505.51	1.30813	0.260877	70.3672	5.24766e-16	4.95512e-15	yes
PARG06877	226.203	-2.46535	0.340414	70.2993	5.42874e-16	5.12335e-15	yes
PARG01764	566.947	0.0829736	0.215177	70.2777	5.48759e-16	5.17612e-15	yes
PARG16240	1228.62	0.967727	0.184338	70.2679	5.51469e-16	5.19889e-15	yes
PARG25455	738.449	1.29543	0.224562	70.2642	5.52495e-16	5.20577e-15	yes
PARG20974	154.565	3.0813	0.474793	70.2501	5.56383e-16	5.2396e-15	yes
PARG06857	301.819	1.45443	0.273359	70.2145	5.66391e-16	5.33099e-15	yes
PARG07437	530.022	0.707418	0.230364	70.1215	5.93357e-16	5.58181e-15	yes
PARG03304	1078.54	0.625758	0.181608	70.12	5.93795e-16	5.58294e-15	yes
PARG06086	335.268	-0.412048	0.304091	70.1092	5.97013e-16	5.6102e-15	yes
PARG24075	632.373	0.779206	0.218993	70.0878	6.03435e-16	5.66752e-15	yes
PARG27809	1387.55	-0.396786	0.183402	70.0669	6.09775e-16	5.72401e-15	yes
PARG05857	206.296	1.31694	0.435801	70.0562	6.13031e-16	5.7515e-15	yes
PARG25097	291.495	0.730546	0.271677	70.0497	6.15026e-16	5.76714e-15	yes
PARG07772	2677.3	-0.107972	0.157524	70.0469	6.15894e-16	5.7722e-15
PARG05460	139.08	1.99034	0.39022	70.0322	6.20457e-16	5.81187e-15	yes
PARG18971	292.269	1.90378	0.326083	70.0138	6.26181e-16	5.86236e-15	yes
PARG21172	348.32	0.367828	0.247299	70.0074	6.28185e-16	5.87799e-15	yes
PARG06910	148.306	2.60817	0.398817	69.9321	6.52295e-16	6.09943e-15	yes
PARG12284	173.624	5.50604	0.706887	69.9313	6.52543e-16	6.09943e-15	yes
PARG02402	1985.57	-0.347283	0.157571	69.8858	6.67578e-16	6.23664e-15	yes
PARG04590	89.4161	1.15745	0.639847	69.8463	6.80867e-16	6.35741e-15	yes
PARG05978	1247.23	0.465289	0.213949	69.8385	6.8354e-16	6.37898e-15	yes
PARG17323	1032.39	1.05209	0.177176	69.8268	6.8756e-16	6.41309e-15	yes
PARG14045	1251.68	-1.8831	0.270306	69.7703	7.07266e-16	6.5934e-15	yes
PARG26062	2398.02	-0.854386	0.149435	69.7071	7.29944e-16	6.8012e-15
PARG27578	293.828	0.490657	0.323963	69.5024	8.08635e-16	7.53041e-15	yes
PARG11831	1027.29	-0.0925411	0.206936	69.4974	8.10646e-16	7.54515e-15	yes
PARG07385	1496.63	-0.107401	0.181341	69.4728	8.20671e-16	7.63441e-15	yes
PARG24510	2527.93	0.840031	0.161576	69.3732	8.6259e-16	8.02013e-15	yes
PARG04962	769.575	2.01422	0.243036	69.3645	8.66346e-16	8.05079e-15	yes
PARG25195	3580.66	0.803864	0.264772	69.3554	8.70276e-16	8.08304e-15	yes
PARG28249	1257.98	1.32846	0.17243	69.332	8.80533e-16	8.17399e-15	yes
PARG24441	739.796	0.763005	0.196741	69.3256	8.83349e-16	8.1958e-15	yes
PARG25981	344.198	1.46895	0.356593	69.0467	1.01552e-15	9.41714e-15	yes
PARG03068	333.63	-0.631896	0.28856	68.9929	1.04321e-15	9.66883e-15	yes
PARG04573	84.6064	3.24287	0.557113	68.9701	1.0552e-15	9.77481e-15	yes
PARG12649	1961.04	-1.13709	0.159982	68.9381	1.07221e-15	9.92716e-15	yes
PARG26687	1421.29	-1.39666	0.181467	68.8998	1.09292e-15	1.01135e-14	yes
PARG26581	241.03	0.953052	0.304439	68.7779	1.16164e-15	1.07438e-14	yes
PARG24919	181.783	-1.98182	0.347182	68.7225	1.19427e-15	1.10398e-14	yes
PARG05785	1872.69	0.107432	0.160313	68.721	1.19513e-15	1.10419e-14	yes
PARG21543	478.004	1.55506	0.244154	68.7124	1.20031e-15	1.10839e-14	yes
PARG26698	1632.42	-1.15982	0.186998	68.6918	1.21271e-15	1.11926e-14	yes
PARG19536	79.6853	2.05756	0.513669	68.6851	1.2168e-15	1.12244e-14	yes
PARG00511	1333.13	1.53688	0.208117	68.6722	1.2247e-15	1.12914e-14	yes
PARG12844	165.994	1.89867	0.36517	68.6685	1.22692e-15	1.1306e-14	yes
PARG07801	132.518	1.87954	0.429609	68.6522	1.23699e-15	1.13928e-14	yes
PARG19327	468.35	1.8804	0.314976	68.5768	1.28448e-15	1.1824e-14	yes
PARG13388	250.228	1.02825	0.287049	68.4946	1.33843e-15	1.23142e-14	yes
PARG18142	1695.11	-1.51033	0.192291	68.4724	1.35334e-15	1.24447e-14	yes
PARG01011	274.076	-1.34891	0.302003	68.406	1.39902e-15	1.28581e-14	yes
PARG12386	4012.37	-0.605276	0.514564	68.3615	1.43047e-15	1.31403e-14	yes
PARG01990	573.241	0.159471	0.227593	68.3417	1.44471e-15	1.32642e-14	yes
PARG24241	2227.19	-0.933513	0.197557	68.2888	1.48346e-15	1.36128e-14	yes
PARG29421	376.046	2.30143	0.276503	68.2788	1.49092e-15	1.36741e-14	yes
PARG00233	932.498	1.76597	0.201587	68.2691	1.49811e-15	1.37329e-14	yes
PARG12684	3224.23	-0.00103159	0.144355	68.2571	1.50718e-15	1.38089e-14
PARG13690	1044	0.752047	0.177465	68.24	1.52008e-15	1.39199e-14	yes
PARG09644	681.873	1.32975	0.208743	68.212	1.54156e-15	1.41092e-14	yes
PARG13237	774.971	0.444687	0.211941	68.1187	1.61516e-15	1.47751e-14	yes
PARG05720	815.688	-0.986668	0.223117	68.0829	1.64428e-15	1.50337e-14	yes
PARG27709	4776.86	0.597785	0.148181	68.0696	1.65531e-15	1.51266e-14
PARG29433	1613.21	0.766012	0.186107	68.0359	1.68342e-15	1.53755e-14	yes
PARG19083	957.241	-0.046978	0.185236	67.7717	1.92115e-15	1.75377e-14	yes
PARG18438	2036.56	-1.3802	0.173426	67.7507	1.9414e-15	1.77134e-14	yes
PARG25375	92.2713	1.71564	0.460919	67.5961	2.09741e-15	1.91269e-14	yes
PARG14248	2094.08	-0.31834	0.157021	67.58	2.11437e-15	1.92716e-14	yes
PARG25739	1007.4	0.0215221	0.191294	67.5515	2.14479e-15	1.95387e-14	yes
PARG21215	838.979	-0.576854	0.268961	67.5357	2.16181e-15	1.96835e-14	yes
PARG05770	121.921	1.55179	0.402614	67.5183	2.18061e-15	1.98445e-14	yes
PARG30222	1416.82	-1.25546	0.177847	67.5052	2.19498e-15	1.99649e-14	yes
PARG08433	295.02	-0.140443	0.30881	67.4531	2.25291e-15	2.04813e-14	yes
PARG00865	823.597	-1.15019	0.18973	67.446	2.26088e-15	2.0543e-14	yes
PARG13211	1642.72	-0.16345	0.16142	67.4169	2.29409e-15	2.08341e-14	yes
PARG27190	857.962	0.0577405	0.18905	67.4117	2.3e-15	2.08769e-14	yes
PARG28281	4371.32	0.829413	0.140276	67.4042	2.30869e-15	2.09449e-14
PARG19717	4124.61	-1.19967	0.15444	67.3938	2.32069e-15	2.10322e-14	yes
PARG20102	593.092	1.07874	0.215675	67.3942	2.3203e-15	2.10322e-14	yes
PARG06126	1086.1	0.0627955	0.175542	67.3834	2.33276e-15	2.11306e-14	yes
PARG16850	1923.31	-1.19792	0.163303	67.37	2.34845e-15	2.12618e-14	yes
PARG28288	5724.55	-0.892936	0.168629	67.2575	2.48434e-15	2.24805e-14	yes
PARG13919	388.994	0.962048	0.265142	67.1797	2.58292e-15	2.33605e-14	yes
PARG10733	4739.33	1.33271	0.158858	67.1755	2.5884e-15	2.33981e-14	yes
PARG07651	354.881	0.268486	0.312949	67.0957	2.69378e-15	2.43381e-14	yes
PARG12106	547.983	0.942086	0.236846	67.0203	2.79724e-15	2.52599e-14	yes
PARG12510	2366.42	1.03865	0.159062	67.012	2.80889e-15	2.53521e-14	yes
PARG18796	890.618	0.870062	0.187558	66.9983	2.82819e-15	2.55132e-14	yes
PARG12963	794.405	1.05209	0.198126	66.9907	2.83898e-15	2.55974e-14	yes
PARG00777	169.692	-0.820263	0.400694	66.9722	2.86528e-15	2.58213e-14	yes
PARG13671	37.8136	8.96139	2.1577	66.9704	2.86784e-15	2.58311e-14	yes
PARG07501	6523.39	0.153773	0.141175	66.9169	2.94562e-15	2.65181e-14
PARG20067	3371.47	-0.532108	0.153378	66.829	3.07797e-15	2.76955e-14	yes
PARG24203	6007.54	-0.599428	0.137917	66.8139	3.10125e-15	2.78906e-14
PARG26339	179.825	-2.82467	0.369199	66.8003	3.12245e-15	2.8067e-14	yes
PARG29256	1143.67	-0.45791	0.18291	66.7947	3.13128e-15	2.81319e-14	yes
PARG06455	535.101	-0.629624	0.223285	66.7081	3.26987e-15	2.9362e-14	yes
PARG10667	1905.97	-1.19092	0.153948	66.706	3.27331e-15	2.93779e-14	yes
PARG02984	143.933	1.80298	0.419392	66.6956	3.29028e-15	2.95151e-14	yes
PARG01363	478.647	-0.858582	0.230207	66.6658	3.33971e-15	2.99433e-14	yes
PARG12008	123.809	0.814257	0.390701	66.6544	3.35879e-15	3.0099e-14	yes
PARG28578	230.128	2.05099	0.357293	66.6144	3.42661e-15	3.06911e-14	yes
PARG03554	626.707	0.1573	0.229116	66.5812	3.48392e-15	3.11886e-14	yes
PARG07642	1578.71	-0.899429	0.173513	66.5364	3.56295e-15	3.18798e-14	yes
PARG10623	724.25	-0.927837	0.198127	66.4642	3.69389e-15	3.30346e-14	yes
PARG05535	605.063	0.943814	0.224991	66.4489	3.72231e-15	3.32601e-14	yes
PARG06764	10358.3	1.0042	0.133814	66.4486	3.72289e-15	3.32601e-14	yes
PARG11212	32.2229	6.30035	1.607	66.4433	3.73272e-15	3.3331e-14	yes
PARG10556	312.487	1.15856	0.376752	66.4226	3.7715e-15	3.36602e-14	yes
PARG13641	113.819	1.88596	0.424258	66.4202	3.77601e-15	3.36833e-14	yes
PARG07750	5636.56	1.44692	0.20282	66.3606	3.89017e-15	3.4684e-14	yes
PARG12705	7064.3	0.905857	0.143323	66.3006	4.00874e-15	3.57231e-14	yes
PARG12223	28.4195	8.5815	2.18312	66.2902	4.02969e-15	3.58747e-14	yes
PARG15190	520.988	-1.47029	0.222808	66.2901	4.02983e-15	3.58747e-14	yes
PARG00632	1049.07	0.127852	0.191959	66.2733	4.06392e-15	3.61599e-14	yes
PARG13351	2409.37	0.299704	0.154513	66.2508	4.10988e-15	3.65503e-14	yes
PARG11530	1510.53	1.08932	0.168941	66.2378	4.13665e-15	3.67697e-14	yes
PARG19759	459.912	-0.703517	0.230284	66.2007	4.21405e-15	3.74388e-14	yes
PARG27663	2245.24	-1.25581	0.159617	66.1261	4.37425e-15	3.88424e-14	yes
PARG06150	1099.53	0.762404	0.175485	66.059	4.5234e-15	4.01466e-14	yes
PARG11081	164.018	2.019	0.357692	66.0147	4.62486e-15	4.10264e-14	yes
PARG23565	351.196	1.18755	0.373642	65.981	4.70328e-15	4.1701e-14	yes
PARG24635	263.911	1.86674	0.370237	65.966	4.73867e-15	4.19936e-14	yes
PARG29956	649.474	0.392229	0.227009	65.8982	4.90217e-15	4.34207e-14	yes
PARG27849	1044.69	-1.55971	0.244425	65.8905	4.921e-15	4.35654e-14	yes
PARG25073	2986.54	-0.379958	0.249764	65.8362	5.05652e-15	4.47427e-14	yes
PARG12557	854.274	-0.427172	0.210773	65.7497	5.27999e-15	4.66965e-14	yes
PARG17673	741.233	-1.13452	0.192837	65.7119	5.38077e-15	4.7564e-14	yes
PARG23854	1463.4	-0.369881	0.2083	65.6897	5.44088e-15	4.80711e-14	yes
PARG01192	6686.78	-1.05509	0.187783	65.6705	5.4933e-15	4.85099e-14	yes
PARG23447	492.565	-1.29237	0.236582	65.6406	5.57591e-15	4.92147e-14	yes
PARG25480	906.012	1.25528	0.28385	65.5731	5.76749e-15	5.08801e-14	yes
[truncated: 20,452 more rows]

## Sheet: DESeq2_Interaction
gene_id	baseMean	log2FoldChange	lfcSE	stat	pvalue	padj
[truncated: 18,138 more rows]
