# Supplementary material for: Meta-analysis of RNA-Seq studies reveals genes with dominant functions during flower bud endo- to eco-dormancy transition in Prunus species
Source: Sci Rep. 2021 Jun 23;11:13173. doi: 10.1038/s41598-021-92600-6 (PMC8222350; doi:10.1038/s41598-021-92600-6)
Supplement: Supplementary file 5 — Supplementary Information 5. [file 41598_2021_92600_MOESM5_ESM.xlsx]

## Sheet: Samples_P.persica
Supplemental Table 1
	Prunus persica
Study original description								Meta-analysis
Run	BioSample	Genotype	phenotype	Sample Name	tissue	collection_date	dev_stage	Cultivar_description	Sample
SRR10150134	SAMN12791307	A209	low chill	A209-1-0	floral bud	2015-10-14	dormant(0 chill hours)	LCR	En1
SRR10150137	SAMN12791305	A209	low chill	A209-2-0	floral bud	2015-10-16	dormant(0 chill hours)	LCR	En1
SRR10150135	SAMN12791306	A209	low chill	A209-3-0	floral bud	2015-10-14	dormant(0 chill hours)	LCR	En1
SRR10150138	SAMN12791304	A209	low chill	A209-4-0	floral bud	2015-10-16	dormant(0 chill hours)	LCR	En1
SRR10150122	SAMN12791309	A209	low chill	A209-1 (100)	floral bud	2015-11-23	dormant(100 chill hours)	LCR	En2
SRR10150123	SAMN12791308	A209	low chill	A209-2 (100)	floral bud	2015-11-23	dormant(100 chill hours)	LCR	En2
SRR10150120	SAMN12791310	A209	low chill	A209-3 (100)	floral bud	2015-11-23	dormant(100 chill hours)	LCR	En2
SRR10150119	SAMN12791311	A209	low chill	A209-4 (100)	floral bud	2015-11-23	dormant(100 chill hours)	LCR	En2
SRR10150111	SAMN12791312	A209	low chill	A209-1 (600)	floral bud	2016-01-28	dormant(600 chill hours)	LCR	Eco
SRR10150109	SAMN12791313	A209	low chill	A209-2 (600)	floral bud	2016-01-28	dormant(600 chill hours)	LCR	Eco
SRR10150108	SAMN12791314	A209	low chill	A209-3 (600)	floral bud	2016-01-28	dormant(600 chill hours)	LCR	Eco
SRR10150107	SAMN12791315	A209	low chill	A209-4 (600)	floral bud	2016-01-28	dormant(600 chill hours)	LCR	Eco
SRR10150221	SAMN12791316	A209	low chill	A209-1 (Pre-B)	floral bud	2016-02-10	prebloom	LCR	n.i.
SRR10150220	SAMN12791317	A209	low chill	A209-2 (Pre-B)	floral bud	2016-02-10	prebloom	LCR	n.i.
SRR10150219	SAMN12791318	A209	low chill	A209-3 (Pre-B)	floral bud	2016-02-10	prebloom	LCR	n.i.
SRR10150218	SAMN12791319	A209	low chill	A209-4 (Pre-B)	floral bud	2016-02-10	prebloom	LCR	n.i.
SRR10150133	SAMN12791357	A340	low chill	A340-1-0	floral bud	2015-10-14	dormant(0 chill hours)	LCR	En1
SRR10150131	SAMN12791358	A340	low chill	A340-2-0	floral bud	2015-10-16	dormant(0 chill hours)	LCR	En1
SRR10150129	SAMN12791359	A340	low chill	A340-3-0	floral bud	2015-10-16	dormant(0 chill hours)	LCR	En1
SRR10150128	SAMN12791360	A340	low chill	A340-4-0	floral bud	2015-10-16	dormant(0 chill hours)	LCR	En1
SRR10150115	SAMN12791361	A340	low chill	A340-1 (100)	floral bud	2015-11-23	dormant(100 chill hours)	LCR	En2
SRR10150114	SAMN12791362	A340	low chill	A340-2 (100)	floral bud	2015-11-23	dormant(100 chill hours)	LCR	En2
SRR10150113	SAMN12791363	A340	low chill	A340-3 (100)	floral bud	2015-11-23	dormant(100 chill hours)	LCR	En2
SRR10150112	SAMN12791364	A340	low chill	A340-4 (100)	floral bud	2015-11-23	dormant(100 chill hours)	LCR	En2
SRR10150225	SAMN12791365	A340	low chill	A340-1 (600)	floral bud	2016-01-28	dormant(600 chill hours)	LCR	Eco
SRR10150224	SAMN12791366	A340	low chill	A340-2 (600)	floral bud	2016-01-28	dormant(600 chill hours)	LCR	Eco
SRR10150223	SAMN12791367	A340	low chill	A340-3 (600)	floral bud	2016-01-28	dormant(600 chill hours)	LCR	Eco
SRR10150222	SAMN12791368	A340	low chill	A340-4 (600)	floral bud	2016-01-28	dormant(600 chill hours)	LCR	Eco
SRR10150208	SAMN12791369	A340	low chill	A340-1 (Pre-B)	floral bud	2016-02-10	prebloom	LCR	n.i.
SRR10150207	SAMN12791370	A340	low chill	A340-2 (Pre-B)	floral bud	2016-02-10	prebloom	LCR	n.i.
SRR10150206	SAMN12791371	A340	low chill	A340-3 (Pre-B)	floral bud	2016-02-10	prebloom	LCR	n.i.
SRR10150205	SAMN12791372	A340	low chill	A340-4 (Pre-B)	floral bud	2016-02-10	prebloom	LCR	n.i.
SRR10150127	SAMN12791322	A318	high chill	A318-1-0	floral bud	2015-10-14	dormant(0 chill hours)	HCR	En1
SRR10150140	SAMN12791320	A318	high chill	A318-2-0	floral bud	2015-10-16	dormant(0 chill hours)	HCR	En1
SRR10150130	SAMN12791321	A318	high chill	A318-3-0	floral bud	2015-10-16	dormant(0 chill hours)	HCR	En1
SRR10150126	SAMN12791323	A318	high chill	A318-2 (100)	floral bud	2015-11-23	dormant(100 chill hours)	HCR	En2
SRR10150125	SAMN12791324	A318	high chill	A318-3 (100)	floral bud	2015-11-23	dormant(100 chill hours)	HCR	En2
SRR10150124	SAMN12791325	A318	high chill	A318-4 (100)	floral bud	2015-11-23	dormant(100 chill hours)	HCR	En2
SRR10150106	SAMN12791326	A318	high chill	A318-1 (600)	floral bud	2016-01-28	dormant(600 chill hours)	HCR	n.i.
SRR10150105	SAMN12791327	A318	high chill	A318-2 (600)	floral bud	2016-01-28	dormant(600 chill hours)	HCR	n.i.
SRR10150104	SAMN12791328	A318	high chill	A318-3 (600)	floral bud	2016-01-28	dormant(600 chill hours)	HCR	n.i.
SRR10150103	SAMN12791329	A318	high chill	A318-4 (600)	floral bud	2016-01-28	dormant(600 chill hours)	HCR	n.i.
SRR10150217	SAMN12791330	A318	high chill	A318-1 (1000)	floral bud	2016-02-27	dormant(1000 chill hours)	HCR	Eco
SRR10150216	SAMN12791331	A318	high chill	A318-2 (1000)	floral bud	2016-02-27	dormant(1000 chill hours)	HCR	Eco
SRR10150214	SAMN12791332	A318	high chill	A318-3 (1000)	floral bud	2016-02-27	dormant(1000 chill hours)	HCR	Eco
SRR10150213	SAMN12791333	A318	high chill	A318-4 (1000)	floral bud	2016-02-27	dormant(1000 chill hours)	HCR	Eco
SRR10150199	SAMN12791334	A318	high chill	A318-1 (Pre-B)	floral bud	2016-03-17	prebloom	HCR	n.i.
SRR10150198	SAMN12791335	A318	high chill	A318-2 (Pre-B)	floral bud	2016-03-17	prebloom	HCR	n.i.
SRR10150197	SAMN12791336	A318	high chill	A318-3 (Pre-B)	floral bud	2016-03-17	prebloom	HCR	n.i.
SRR10150196	SAMN12791337	A318	high chill	A318-4 (Pre-B)	floral bud	2016-03-17	prebloom	HCR	n.i.
SRR10150136	SAMN12791341	A323	high chill	A323-1-0	floral bud	2015-10-14	dormant(0 chill hours)	HCR	En1
SRR10150142	SAMN12791338	A323	high chill	A323-2-0	floral bud	2015-10-14	dormant(0 chill hours)	HCR	En1
SRR10150139	SAMN12791340	A323	high chill	A323-3-0	floral bud	2015-10-14	dormant(0 chill hours)	HCR	En1
SRR10150141	SAMN12791339	A323	high chill	A323-4-0	floral bud	2015-10-14	dormant(0 chill hours)	HCR	En1
SRR10150118	SAMN12791342	A323	high chill	A323-1 (100)	floral bud	2015-11-23	dormant(100 chill hours)	HCR	En2
SRR10150117	SAMN12791343	A323	high chill	A323-2 (100)	floral bud	2015-11-23	dormant(100 chill hours)	HCR	En2
SRR10150195	SAMN12791344	A323	high chill	A323-3 (100)	floral bud	2015-11-23	dormant(100 chill hours)	HCR	En2
SRR10150116	SAMN12791345	A323	high chill	A323-4 (100)	floral bud	2015-11-23	dormant(100 chill hours)	HCR	En2
SRR10150102	SAMN12791346	A323	high chill	A323-1 (600)	floral bud	2016-01-28	dormant(600 chill hours)	HCR	n.i.
SRR10150101	SAMN12791347	A323	high chill	A323-3 (600)	floral bud	2016-01-28	dormant(600 chill hours)	HCR	n.i.
SRR10150100	SAMN12791348	A323	high chill	A323-4 (600)	floral bud	2016-01-28	dormant(600 chill hours)	HCR	n.i.
SRR10150212	SAMN12791349	A323	high chill	A323-1 (1000)	floral bud	2016-02-27	dormant(1000 chill hours)	HCR	Eco
SRR10150211	SAMN12791350	A323	high chill	A323-2 (1000)	floral bud	2016-02-27	dormant(1000 chill hours)	HCR	Eco
SRR10150210	SAMN12791351	A323	high chill	A323-3 (1000)	floral bud	2016-02-27	dormant(1000 chill hours)	HCR	Eco
SRR10150209	SAMN12791352	A323	high chill	A323-4 (1000)	floral bud	2016-02-27	dormant(1000 chill hours)	HCR	Eco
SRR10150203	SAMN12791353	A323	high chill	A323-1 (Pre-B)	floral bud	2016-03-17	prebloom	HCR	n.i.
SRR10150202	SAMN12791354	A323	high chill	A323-2 (Pre-B)	floral bud	2016-03-17	prebloom	HCR	n.i.
SRR10150201	SAMN12791355	A323	high chill	A323-3 (Pre-B)	floral bud	2016-03-17	prebloom	HCR	n.i.
SRR10150200	SAMN12791356	A323	high chill	A323-4 (Pre-B)	floral bud	2016-03-17	prebloom	HCR	n.i.
